# Supplementary material for: Dynamics of primitive streak regression controls the fate of neuromesodermal progenitors in the chicken embryo
Source: eLife. 2021 Jul 6;10:e64819. doi: 10.7554/eLife.64819 (PMC8260230; doi:10.7554/eLife.64819)
Supplement: Figure 1—figure supplement 1—source data 1. [file elife-64819-fig1-figsupp1-data1.xlsx]

## Sheet: sup Figure 1H
Stage 4	Stage 4+	Stage5	5 somites
28	238	215	396
52	197	250	340
43	107	284
39	103	317
28		197
20		202
16		234
