# Supplementary material for: Dynamics of primitive streak regression controls the fate of neuromesodermal progenitors in the chicken embryo
Source: eLife. 2021 Jul 6;10:e64819. doi: 10.7554/eLife.64819 (PMC8260230; doi:10.7554/eLife.64819)
Supplement: Figure 2—source data 1. [file elife-64819-fig2-data1.xlsx]

## Sheet: Number of cells analyzed
Cell category
non clone	Clones
67	107
99	181
101	151
105	80
200	141
31	67
7	22

## Sheet: Brainbow Analysis Stage HH20
	Embryos
		1 (not in the figure)	2	3	4		total
Clone type	NM	7	9	7	7		23
	M	3	1	2	3		6
	N	0	1	0	1		2

## Sheet: Brainbow Analysis Stage HH17
		Embryos
		1	2	3			total
Clone type	NM	7	2	2			11
	N	0	1	1			2
	M	0	2	1			3

## Sheet: Analysis retrovirus
	Anterior							Posterior
Neural	9	0	0	14	10	1	0	4	5	1	8	3	0	1
Mesoderm	11	0	0	8	20	0	0	4	5	0	3	3	0	0
	Clone 1	Clone 2	Clone 3	Clone 4	Clone 5	Clone 6	Clone 7
Neural	9	0	0	14	10	1	0
Neural posterior	4	5	1	8	3	0	1
Mesoderm posterior	4	5	0	3	3	0	0
Mesoderm	11	0	0	8	20	0	0

## Sheet: HH20e2
ALL CELLS										Non clone cells (silhouette <0.4)											Clone cells (silhouette >0.4)
Cell Type	Cell ID	C1	C2	C3	Y	Clone nb (idx11)	silhouette_idx11			Cell Type	Cell ID	C1	C2	C3	Y	Clone nb	silhouette_idx11	Axis level			Cell Type	Cell ID	C1	C2	C3	Y	Clone nb	silhouette_idx11	Axis level	Assigned Clone type
1	1	59.1243	18.2825	22.5932	3400.59	2	0.489306			2	3	37.7371	22.1343	40.1285	153.75	7	-0.209152	4.49824			1	38	67.2031	19.2509	13.5461	1576.12	1	0.407816	46.1123	NM
1	2	62.2906	18.6983	19.011	3406.24	2	0.417696			2	104	3.60739	73.3204	23.0722	389.41	6	-0.16978	11.3929			2	72	69.1976	15.3478	15.4546	3322.94	1	0.410491	97.2188
1	3	60.2074	19.2256	20.5671	3406.31	2	0.612168			1	11	41.0155	31.9389	27.0456	2826.33	8	-0.164774	82.6896			1	43	65.1288	17.8716	16.9995	1280.2	1	0.429825	37.4547
1	4	58.7531	16.8047	24.4422	3407.77	2	0.230047			2	55	40.1507	17.0837	42.7657	2404.85	7	-0.161037	70.3584			2	68	68.998	14.766	16.236	3370.26	1	0.438409	98.6033
1	5	63.447	17.528	19.0249	3417.33	2	0.22312			2	170	4.7789	72.7762	22.4449	3084.73	6	-0.154786	90.2496			2	86	65.2201	17.9215	16.8585	3316.36	1	0.456657	97.0263
1	6	56.9674	16.1508	26.8818	3414.48	9	0.268823			2	137	2.62919	41.4409	55.9299	2517.53	6	-0.115893	73.6551			1	80	65.7352	16.9845	17.2803	478.69	1	0.468265	14.005
1	7	38.5048	44.1216	17.3736	2816.96	11	0.0829117			2	101	2.61577	73.4156	23.9687	403.86	6	-0.112255	11.8157			2	99	65.224	18.4306	16.3454	381.85	1	0.481032	11.1717
1	8	37.7919	43.2298	18.9784	2817.62	8	-0.0537169			1	14	57.4861	18.4913	24.0226	2135	9	-0.108068	62.4634			2	65	68.4068	16.4938	15.0994	3369.74	1	0.508215	98.5881
1	9	27.4863	43.8134	28.7004	2830.24	8	0.549214			2	97	3.08306	73.1743	23.7426	333.85	6	-0.0974319	9.76741			2	78	65.3993	18.6026	15.9982	3308.16	1	0.514044	96.7864
1	10	29.1676	42.8581	27.9743	2834.4	8	0.540287			2	4	39.3709	17.5503	43.0787	149.05	7	-0.0832938	4.36074			2	79	66.9871	15.5646	17.4483	3308.82	1	0.5178	96.8057
1	11	41.0155	31.9389	27.0456	2826.33	8	-0.164774			1	8	37.7919	43.2298	18.9784	2817.62	8	-0.0537169	82.4348			1	40	65.6982	19.2477	15.0541	1167.07	1	0.539107	34.1448
1	12	35.178	50.1737	14.6484	2801.69	8	0.0385068			1	22	49.9696	18.232	31.7984	1936.28	4	-0.0460849	56.6495			1	47	67.7039	17.407	14.8891	1293.85	1	0.570588	37.854
1	13	52.0245	18.4712	29.5043	2112.45	9	0.469			2	58	48.1184	22.2145	29.6671	3317.93	4	-0.0455176	97.0723			1	78	67.6294	17.4253	14.9454	613.89	1	0.580205	17.9605
1	14	57.4861	18.4913	24.0226	2135	9	-0.108068			2	181	17.4853	66.0499	16.4648	3364	6	-0.00995589	98.4201			2	85	67.7367	16.969	15.2943	3313.46	1	0.586215	96.9415
1	15	46.1425	20.2978	33.5597	2160.79	4	0.504169			1	21	50.3889	16.9316	32.6796	1949.66	4	0.00218083	57.041			2	63	66.1254	17.6945	16.1801	3377.49	1	0.592599	98.8148
1	16	47.3013	17.8786	34.82	2139.85	4	0.481944			1	102	17.6723	53.3328	28.9949	454.31	8	0.00368877	13.2917			1	67	66.1663	18.0508	15.7829	691.48	1	0.606997	20.2305
1	17	25.0048	25.6364	49.3589	2129.93	7	0.471733			2	132	5.96231	71.4453	22.5924	1552.64	6	0.0165278	45.4254			2	81	66.7296	18.3118	14.9587	3323.31	1	0.610156	97.2297
1	18	26.8138	28.165	45.0212	2157.73	7	0.380191			2	151	3.0287	72.6414	24.3299	2871.44	6	0.0240433	84.0094			2	82	67.0426	17.9962	14.9612	3351.69	1	0.610566	98.06
1	19	37.1492	26.4088	36.442	2144.14	4	0.294567			2	153	4.59723	72.0126	23.3902	2896.36	6	0.0256018	84.7384			1	61	66.9147	17.5483	15.5371	926.16	1	0.642835	27.0965
1	20	45.0667	20.797	34.1363	2039.48	4	0.554619			1	75	69.1855	18.1739	12.6406	720.28	1	0.0311378	21.0731			2	77	66.7822	17.4488	15.769	3270.37	1	0.646615	95.6808
1	21	50.3889	16.9316	32.6796	1949.66	4	0.00218083			1	85	36.7507	44.8903	18.359	375.05	8	0.0322617	10.9728			1	2	62.2906	18.6983	19.011	3406.24	2	0.417696	99.6559	NM
1	22	49.9696	18.232	31.7984	1936.28	4	-0.0460849			1	12	35.178	50.1737	14.6484	2801.69	8	0.0385068	81.9687			2	6	60.8034	15.2388	23.9578	315.52	2	0.436993	9.23113
1	23	22.6354	10.5711	66.7935	1795.93	5	0.314057			2	15	58.7549	13.9207	27.3244	314.39	9	0.0486056	9.19807			2	87	58.8895	18.4279	22.6826	3297.32	2	0.451901	96.4693
1	24	16.4805	9.77737	73.7421	1814.89	5	0.529496			2	67	69.4125	17.5763	13.0112	3351.3	1	0.0657004	98.0486			1	45	62.5083	17.4434	20.0483	1265.93	2	0.473115	37.0372
1	25	17.1927	9.45738	73.3499	1837.29	5	0.527838			2	48	37.7213	37.2435	25.0351	2738.3	8	0.0686857	80.1141			1	1	59.1243	18.2825	22.5932	3400.59	2	0.489306	99.4906
1	26	18.8011	9.97533	71.2236	1794.6	5	0.505731			2	123	22.3135	59.1976	18.4889	1033.02	8	0.0754278	30.2229			2	70	61.8163	18.9094	19.2743	3370.38	2	0.489313	98.6068
1	27	43.8573	18.1445	37.9983	1934.24	4	0.587899			2	88	56.9389	18.6448	24.4164	3340.04	9	0.077653	97.7191			1	71	61.678	19.0876	19.2344	713.6	2	0.493758	20.8777
1	28	13.64	54.0466	32.3134	1711.13	6	0.22809			1	59	41.1844	13.02	45.7956	945.12	7	0.0785634	27.6513			2	33	61.9728	18.5405	19.4866	1549.55	2	0.496176	45.335
1	29	14.877	54.1376	30.9854	1711.51	6	0.163282			1	64	62.7063	20.1286	17.1651	668.23	2	0.0822092	19.5503			1	44	62.3826	17.2144	20.403	1243.87	2	0.50358	36.3917
1	30	15.9783	59.4422	24.5795	1678.57	6	0.279728			1	7	38.5048	44.1216	17.3736	2816.96	11	0.0829117	82.4154			2	18	59.5638	17.5282	22.908	393.26	2	0.512958	11.5056
1	31	25.4375	21.9079	52.6546	1762.74	7	0.491746			2	103	2.08939	72.6283	25.2824	351.28	6	0.0851159	10.2774			1	36	62.0205	15.7467	22.2328	1616.17	2	0.523064	47.2841
1	32	35.1426	16.9054	47.952	1710.02	7	0.416798			1	93	68.8913	8.58034	22.5284	33.51	1	0.0939565	0.980398			2	10	59.2991	20.4666	20.2342	313.57	2	0.527196	9.17408
1	33	58.2707	19.5854	22.1438	1637.38	2	0.37455			2	62	52.3223	29.6712	18.0065	3315.33	11	0.104416	96.9962			2	90	60.1283	16.8491	23.0226	3303.18	2	0.531841	96.6407
1	34	15.3024	60.0952	24.6024	1663.78	6	0.334023			2	75	63.5855	17.8455	18.569	3263.12	2	0.118907	95.4687			1	49	61.5887	18.413	19.9983	1271.73	2	0.561878	37.2068
1	35	63.1834	15.0549	21.7618	1618.34	2	0.384404			2	29	45.5749	30.4455	23.9796	1191.28	11	0.120908	34.8531			2	16	61.4319	16.1369	22.4312	377.12	2	0.569834	11.0334
1	36	62.0205	15.7467	22.2328	1616.17	2	0.523064			2	31	56.1963	24.5447	19.259	1178.51	2	0.121778	34.4795			2	45	61.4848	17.8292	20.686	2764.39	2	0.597916	80.8774
1	37	63.3295	20.8801	15.7904	1606.12	1	0.144498			1	86	65.408	15.1571	19.4348	376.44	1	0.123616	11.0135			1	66	61.3991	17.3479	21.2529	715.34	2	0.606711	20.9286
1	38	67.2031	19.2509	13.5461	1576.12	1	0.407816			1	77	70.0685	15.6605	14.271	571.08	1	0.13276	16.708			1	69	60.2088	17.5557	22.2355	715	2	0.611357	20.9187
1	39	74.6634	13.7686	11.568	1222.9	10	0.54447			1	103	58.6175	25.8947	15.4878	568.16	2	0.141122	16.6226			1	3	60.2074	19.2256	20.5671	3406.31	2	0.612168	99.658
1	40	65.6982	19.2477	15.0541	1167.07	1	0.539107			2	42	35.0159	22.7942	42.1899	2656.49	7	0.141529	77.7206			2	59	61.2708	17.6928	21.0364	3328.16	2	0.61432	97.3716
1	41	69.7589	16.2309	14.0102	1199.66	1	0.166981			1	37	63.3295	20.8801	15.7904	1606.12	1	0.144498	46.9901			2	84	60.3189	17.4781	22.203	3325.76	2	0.616954	97.3013
1	42	73.5772	15.7398	10.683	1337.79	10	0.626433			1	91	52.991	14.0534	32.9556	37.39	9	0.148686	1.09391			2	28	60.8128	18.6332	20.554	1238.31	2	0.617245	36.2291
1	43	65.1288	17.8716	16.9995	1280.2	1	0.429825			1	70	57.7781	18.5236	23.6983	724.47	2	0.156159	21.1957			2	34	61.1214	17.6677	21.2109	1548.97	2	0.622209	45.318
1	44	62.3826	17.2144	20.403	1243.87	2	0.50358			2	122	39.2945	47.7411	12.9644	1022.26	11	0.159426	29.9081			2	27	60.6844	18.6235	20.6921	1234.73	2	0.623037	36.1243
1	45	62.5083	17.4434	20.0483	1265.93	2	0.473115			1	29	14.877	54.1376	30.9854	1711.51	6	0.163282	50.0734			2	91	61.0845	17.5132	21.4023	3288.66	2	0.623244	96.2159
1	46	75.1196	16.3541	8.52633	1276.03	10	0.57625			2	71	61.0008	22.6214	16.3778	3369.71	2	0.166442	98.5872			2	108	2.59962	75.7043	21.6961	339.86	3	0.473283	9.94324	NM
1	47	67.7039	17.407	14.8891	1293.85	1	0.570588			1	41	69.7589	16.2309	14.0102	1199.66	1	0.166981	35.0983			1	118	1.83361	76.3356	21.8308	1594.35	3	0.500097	46.6457
1	48	55.5913	19.3088	25.0998	1251	9	0.3674			2	182	3.82977	38.0823	58.088	3373.74	5	0.170251	98.7051			1	97	2.62602	76.2885	21.0854	239.39	3	0.544055	7.0038
1	49	61.5887	18.413	19.9983	1271.73	2	0.561878			1	52	41.0103	11.6042	47.3856	942.65	7	0.181737	27.579			2	180	1.78261	90.997	7.22035	3340.54	3	0.554195	97.7338
1	50	46.4432	11.4883	42.0685	968.5	4	0.322582			2	178	1.77699	38.4811	59.7419	3337.31	5	0.190137	97.6393			1	123	5.61115	75.6262	18.7626	3136.2	3	0.560142	91.7554
1	51	44.7697	13.3781	41.8522	978.52	4	0.34521			2	76	63.6492	17.0926	19.2582	3346.01	2	0.203412	97.8938			2	112	3.74049	76.0331	20.2264	476.05	3	0.562679	13.9277
1	52	41.0103	11.6042	47.3856	942.65	7	0.181737			1	79	64.3573	17.9782	17.6645	521.12	1	0.204563	15.2463			2	169	6.3428	75.8631	17.7941	3085.59	3	0.581858	90.2747
1	53	35.6747	10.0717	54.2536	926.56	7	0.453377			2	89	57.5117	19.9489	22.5394	3338.54	2	0.205243	97.6752			2	118	3.35114	76.6638	19.9851	1244.65	3	0.6075	36.4146
1	54	34.8617	10.163	54.9752	970.89	7	0.46279			1	100	2.58745	71.7569	25.6557	322.4	6	0.20685	9.43242			1	110	1.58815	88.7398	9.67202	962.09	3	0.608093	28.1477
1	55	38.3566	10.7257	50.9177	950.45	7	0.388854			1	90	64.1577	12.3057	23.5366	36.8	2	0.214654	1.07665			2	168	4.98027	76.3174	18.7023	3230.23	3	0.612191	94.5064
1	56	38.1294	10.608	51.2626	915.81	7	0.398587			2	66	64.3387	18.1194	17.5419	3373.89	1	0.215935	98.7095			2	100	1.64219	77.7397	20.6181	385.22	3	0.619135	11.2703
1	57	40.2438	10.8371	48.9191	949.76	7	0.276869			2	175	5.61357	72.932	21.4544	3175.1	3	0.216351	92.8935			2	156	5.21543	77.05	17.7345	2835.14	3	0.655764	82.9473
1	58	35.7802	10.7526	53.4673	980.85	7	0.460897			2	173	3.91472	71.2684	24.8169	3117.27	6	0.21796	91.2016			2	106	2.86189	77.5489	19.5892	315.39	3	0.658404	9.22733
1	59	41.1844	13.02	45.7956	945.12	7	0.0785634			1	113	2.34709	74.2457	23.4073	1351.83	3	0.221036	39.5503			1	117	1.29006	86.4481	12.2618	1419.81	3	0.667646	41.5392
1	60	34.9777	19.7789	45.2434	968.52	7	0.321275			1	5	63.447	17.528	19.0249	3417.33	2	0.22312	99.9804			1	107	2.35689	85.9488	11.6943	979.09	3	0.674748	28.6451
1	61	66.9147	17.5483	15.5371	926.16	1	0.642835			2	22	59.2002	15.9579	24.842	468.5	2	0.223399	13.7068			2	129	2.14649	85.8325	12.021	1307.44	3	0.679041	38.2516
1	62	38.3549	13.4032	48.2419	969.73	7	0.336958			1	28	13.64	54.0466	32.3134	1711.13	6	0.22809	50.0623			1	122	5.513	81.9127	12.5743	3124.62	3	0.689043	91.4166
1	63	61.7298	19.8377	18.4326	639.57	2	0.391849			2	73	69.3477	16.8857	13.7667	3302.79	1	0.228639	96.6293			2	167	4.26519	77.8215	17.9133	3137.6	3	0.695064	91.7964
1	64	62.7063	20.1286	17.1651	668.23	2	0.0822092			1	4	58.7531	16.8047	24.4422	3407.77	2	0.230047	99.7007			2	102	2.30385	78.5041	19.1921	328.26	3	0.697443	9.60386
1	65	64.1715	19.0701	16.7584	692.61	1	0.252527			2	30	52.0669	25.7482	22.185	1187.59	9	0.239681	34.7452			1	114	1.27214	84.8051	13.9228	1417.4	3	0.705457	41.4687
1	66	61.3991	17.3479	21.2529	715.34	2	0.606711			2	40	45.8702	23.7984	30.3314	2734.8	4	0.241018	80.0117			1	115	1.22	84.5895	14.1905	1412.29	3	0.708748	41.3192
1	67	66.1663	18.0508	15.7829	691.48	1	0.606997			2	43	31.9336	25.5508	42.5156	2691.39	7	0.244301	78.7417			1	96	2.32253	78.8305	18.847	113.91	3	0.714651	3.33265
1	68	53.7228	18.8854	27.3918	700.47	9	0.576307			1	125	5.024	70.616	24.36	3171.95	6	0.247845	92.8013			2	126	2.62094	84.1056	13.2734	1314.73	3	0.716371	38.4649
1	69	60.2088	17.5557	22.2355	715	2	0.611357			2	163	6.38858	72.8581	20.7533	3197.44	3	0.249924	93.5471			1	116	1.28935	84.2467	14.464	1434.9	3	0.717125	41.9807
1	70	57.7781	18.5236	23.6983	724.47	2	0.156159			1	65	64.1715	19.0701	16.7584	692.61	1	0.252527	20.2636			1	95	2.81326	78.6841	18.5027	102.36	3	0.720059	2.99473
1	71	61.678	19.0876	19.2344	713.6	2	0.493758			2	145	35.9865	37.9888	26.0248	2555.66	8	0.259355	74.7706			2	105	3.1359	78.6254	18.2387	387.58	3	0.722046	11.3394
1	72	70.5188	19.7818	9.6994	743.85	10	0.439368			1	101	19.7299	49.1702	31.1	449.63	8	0.267829	13.1548			2	121	4.68089	79.2706	16.0485	1074.52	3	0.726899	31.4371
1	73	71.1951	17.5493	11.2556	731.11	10	0.507181			1	6	56.9674	16.1508	26.8818	3414.48	9	0.268823	99.897			1	106	1.51932	83.6164	14.8642	946.41	3	0.728062	27.689
1	74	70.297	19.0301	10.6729	735.11	10	0.422333			2	177	4.13695	70.8116	25.0514	3303.85	6	0.271549	96.6603			1	108	2.30896	83.698	13.9931	984.52	3	0.728136	28.804
1	75	69.1855	18.1739	12.6406	720.28	1	0.0311378			1	57	40.2438	10.8371	48.9191	949.76	7	0.276869	27.787			2	165	4.25089	78.9203	16.8289	3199.97	3	0.730437	93.6211
1	76	76.0208	13.5809	10.3984	783.65	10	0.550722			2	176	6.26227	69.7114	24.0263	3312.38	6	0.277341	96.9099			2	113	4.11757	78.8972	16.9852	490.67	3	0.731149	14.3555
1	77	70.0685	15.6605	14.271	571.08	1	0.13276			2	92	69.9922	13.4123	16.5955	3274.36	1	0.277384	95.7975			1	94	1.35063	80.6682	17.9812	82.99	3	0.731881	2.42803
1	78	67.6294	17.4253	14.9454	613.89	1	0.580205			1	30	15.9783	59.4422	24.5795	1678.57	6	0.279728	49.1097			2	125	4.00639	81.7306	14.263	1353.32	3	0.734069	39.5939
1	79	64.3573	17.9782	17.6645	521.12	1	0.204563			2	148	26.1402	31.1597	42.7001	2677.64	7	0.283764	78.3394			2	171	2.74934	79.1329	18.1177	3065.8	3	0.734119	89.6957
1	80	65.7352	16.9845	17.2803	478.69	1	0.468265			1	89	22.2946	22.9446	54.7608	31.75	7	0.284441	0.928906			1	99	1.74443	83.1476	15.108	248.19	3	0.735148	7.26126
1	81	27.2522	21.5119	51.2359	478.01	7	0.510926			2	54	33.3158	22.9995	43.6847	2410.95	7	0.287276	70.5369			2	117	3.43891	81.6141	14.947	1330.84	3	0.746081	38.9362
1	82	32.095	46.9748	20.9302	407.48	8	0.377792			2	32	62.9923	18.1468	18.861	1563.44	2	0.290095	45.7414			1	124	3.6757	79.8155	16.5088	3220.18	3	0.746573	94.2124
1	83	63.2977	16.1663	20.536	364.52	2	0.361458			1	88	23.5075	20.7202	55.7723	17.73	7	0.290946	0.518724			2	111	3.48038	79.6293	16.8903	448.83	3	0.74746	13.1314
1	84	41.4765	44.5252	13.9983	355.83	11	0.355026			2	60	69.4308	20.6719	9.89739	3340.27	10	0.291238	97.7259			2	120	3.56565	81.1264	15.3079	1082.23	3	0.747741	31.6627
1	85	36.7507	44.8903	18.359	375.05	8	0.0322617			2	20	46.4975	22.3785	31.1239	499.5	4	0.291466	14.6138			2	166	3.49766	79.7111	16.7912	3130.2	3	0.748206	91.5799
1	86	65.408	15.1571	19.4348	376.44	1	0.123616			1	19	37.1492	26.4088	36.442	2144.14	4	0.294567	62.7308			1	109	2.52337	80.555	16.9216	989.78	3	0.754826	28.9579
1	87	29.2215	18.7746	52.0039	20.69	7	0.507352			2	94	42.2277	27.2425	30.5298	3269.79	4	0.308591	95.6638			2	183	2.70253	80.6697	16.6278	3348.09	3	0.75569	97.9547
1	88	23.5075	20.7202	55.7723	17.73	7	0.290946			2	12	48.5294	18.2296	33.241	423.65	4	0.310223	12.3947			2	49	40.9	19.1608	39.9392	2494.45	4	0.400629	72.9798	NM
1	89	22.2946	22.9446	54.7608	31.75	7	0.284441			2	164	8.32914	68.1495	23.5213	3160.04	6	0.310601	92.4529			2	46	39.1178	27.7365	33.1456	2838.21	4	0.411667	83.0372
1	90	64.1577	12.3057	23.5366	36.8	2	0.214654			1	23	22.6354	10.5711	66.7935	1795.93	5	0.314057	52.5433			2	2	47.9578	17.2537	34.7885	143.16	4	0.428599	4.18841
1	91	52.991	14.0534	32.9556	37.39	9	0.148686			1	60	34.9777	19.7789	45.2434	968.52	7	0.321275	28.3359			1	16	47.3013	17.8786	34.82	2139.85	4	0.481944	62.6053
1	92	42.1711	16.8025	41.0264	31.22	4	0.38215			1	50	46.4432	11.4883	42.0685	968.5	4	0.322582	28.3353			2	11	46.0563	20.5169	33.4268	354.62	4	0.501195	10.3751
1	93	68.8913	8.58034	22.5284	33.51	1	0.0939565			2	69	70.2163	18.1308	11.6529	3360.26	10	0.323537	98.3107			1	15	46.1425	20.2978	33.5597	2160.79	4	0.504169	63.218
1	94	1.35063	80.6682	17.9812	82.99	3	0.731881			2	174	3.9877	70.4093	25.603	3178.14	6	0.330478	92.9824			2	41	43.5394	23.3224	33.1382	2746.84	4	0.504326	80.364
1	95	2.81326	78.6841	18.5027	102.36	3	0.720059			1	34	15.3024	60.0952	24.6024	1663.78	6	0.334023	48.677			2	8	40.501	22.7359	36.7632	284.96	4	0.512174	8.33704
1	96	2.32253	78.8305	18.847	113.91	3	0.714651			2	26	48.49	17.9905	33.5195	572.24	4	0.33578	16.742			2	13	46.8584	17.1329	36.0087	449.37	4	0.515424	13.1472
1	97	2.62602	76.2885	21.0854	239.39	3	0.544055			1	62	38.3549	13.4032	48.2419	969.73	7	0.336958	28.3713			2	24	45.7875	19.8355	34.377	431.79	4	0.546394	12.6328
1	98	2.59441	66.3458	31.0598	257.22	6	0.555325			2	95	3.48254	70.4927	26.0247	283.28	6	0.340381	8.28789			1	20	45.0667	20.797	34.1363	2039.48	4	0.554619	59.6688
1	99	1.74443	83.1476	15.108	248.19	3	0.735148			2	93	56.245	17.3227	26.4323	3267.1	9	0.340639	95.5851			2	9	45.7027	17.6923	36.6049	316.21	4	0.571713	9.25132
1	100	2.58745	71.7569	25.6557	322.4	6	0.20685			1	51	44.7697	13.3781	41.8522	978.52	4	0.34521	28.6284			2	150	41.5629	21.439	36.9981	2773.35	4	0.57474	81.1396
1	101	19.7299	49.1702	31.1	449.63	8	0.267829			2	52	54.3034	21.9638	23.7329	2403.96	9	0.346883	70.3324			2	50	43.9154	21.1611	34.9235	2434.41	4	0.585581	71.2232
1	102	17.6723	53.3328	28.9949	454.31	8	0.00368877			2	23	43.6083	14.6799	41.7117	424.96	4	0.348627	12.433			1	27	43.8573	18.1445	37.9983	1934.24	4	0.587899	56.5898
1	103	58.6175	25.8947	15.4878	568.16	2	0.141122			2	51	48.4388	17.821	33.7402	2418.39	4	0.352996	70.7545			2	39	42.326	21.083	36.591	2741.33	4	0.595744	80.2028
1	104	3.85638	49.9453	46.1983	948.05	6	0.367588			1	84	41.4765	44.5252	13.9983	355.83	11	0.355026	10.4105			2	17	44.3355	19.7324	35.9321	401.3	4	0.597106	11.7408
1	105	3.57878	56.0561	40.3651	962.56	6	0.479625			2	135	33.2153	45.4994	21.2853	2495.23	8	0.36141	73.0026			2	19	21.5183	8.14865	70.3331	280.79	5	0.429655	8.21504	NM
1	106	1.51932	83.6164	14.8642	946.41	3	0.728062			1	83	63.2977	16.1663	20.536	364.52	2	0.361458	10.6647			1	26	18.8011	9.97533	71.2236	1794.6	5	0.505731	52.5044
1	107	2.35689	85.9488	11.6943	979.09	3	0.674748			2	119	3.00214	49.7151	47.2827	1240.07	6	0.365054	36.2806			1	25	17.1927	9.45738	73.3499	1837.29	5	0.527838	53.7534
1	108	2.30896	83.698	13.9931	984.52	3	0.728136			2	64	69.0257	16.6329	14.3414	3385.91	1	0.365845	99.0611			1	24	16.4805	9.77737	73.7421	1814.89	5	0.529496	53.098
1	109	2.52337	80.555	16.9216	989.78	3	0.754826			2	35	50.428	20.4822	29.0897	1536.23	9	0.367084	44.9453			1	112	1.22016	70.0937	28.6862	1109.98	6	0.407065	32.4745	NM
1	110	1.58815	88.7398	9.67202	962.09	3	0.608093			1	48	55.5913	19.3088	25.0998	1251	9	0.3674	36.6004			2	157	6.37281	68.2006	25.4266	3187.02	6	0.4219	93.2422
1	111	3.45096	67.0718	29.4772	1032.84	6	0.554854			1	104	3.85638	49.9453	46.1983	948.05	6	0.367588	27.737			2	130	2.43403	52.3535	45.2124	1271.79	6	0.42272	37.2086
1	112	1.22016	70.0937	28.6862	1109.98	6	0.407065			1	33	58.2707	19.5854	22.1438	1637.38	2	0.37455	47.9046			2	172	4.43489	68.9312	26.6339	3073.38	6	0.449604	89.9175
1	113	2.34709	74.2457	23.4073	1351.83	3	0.221036			2	7	56.0757	15.3746	28.5497	248.03	9	0.375929	7.25658			2	134	4.53852	68.7747	26.6868	1539.74	6	0.457701	45.048
1	114	1.27214	84.8051	13.9228	1417.4	3	0.705457			1	82	32.095	46.9748	20.9302	407.48	8	0.377792	11.9216			2	131	3.6139	54.2963	42.0898	1280.11	6	0.460793	37.452
1	115	1.22	84.5895	14.1905	1412.29	3	0.708748			1	18	26.8138	28.165	45.0212	2157.73	7	0.380191	63.1284			2	133	5.73772	67.8554	26.4069	1511.91	6	0.473638	44.2338
1	116	1.28935	84.2467	14.464	1434.9	3	0.717125			1	92	42.1711	16.8025	41.0264	31.22	4	0.38215	0.9134			1	105	3.57878	56.0561	40.3651	962.56	6	0.479625	28.1615
1	117	1.29006	86.4481	12.2618	1419.81	3	0.667646			1	35	63.1834	15.0549	21.7618	1618.34	2	0.384404	47.3476			1	120	2.58405	68.5606	28.8553	1645.26	6	0.50248	48.1352
1	118	1.83361	76.3356	21.8308	1594.35	3	0.500097			1	55	38.3566	10.7257	50.9177	950.45	7	0.388854	27.8072			2	127	2.75256	59.8174	37.43	1211.42	6	0.508985	35.4424
1	119	2.07318	68.0106	29.9163	1634.95	6	0.518588			2	21	55.5864	18.9534	25.4602	497.87	9	0.390299	14.5661			2	115	2.69312	68.3452	28.9617	1271.14	6	0.513307	37.1896
1	120	2.58405	68.5606	28.8553	1645.26	6	0.50248			2	98	2.9431	70.1348	26.9221	332.79	6	0.391146	9.7364			2	158	9.89953	58.5918	31.5087	3199.33	6	0.513904	93.6024
1	121	1.80901	67.9062	30.2848	1690.51	6	0.515692			1	63	61.7298	19.8377	18.4326	639.57	2	0.391849	18.7118			1	121	1.80901	67.9062	30.2848	1690.51	6	0.515692	49.459
1	122	5.513	81.9127	12.5743	3124.62	3	0.689043			2	179	4.89798	74.2722	20.8299	3327.39	3	0.392457	97.349			1	119	2.07318	68.0106	29.9163	1634.95	6	0.518588	47.8335
1	123	5.61115	75.6262	18.7626	3136.2	3	0.560142			2	139	33.9916	38.2544	27.754	2558.27	8	0.393782	74.847			2	110	5.0642	58.6548	36.281	411.43	6	0.520117	12.0372
1	124	3.6757	79.8155	16.5088	3220.18	3	0.746573			2	116	1.9654	70.1921	27.8425	1170.04	6	0.396262	34.2317			2	162	4.3373	67.7839	27.8788	3056	6	0.521569	89.409
1	125	5.024	70.616	24.36	3171.95	6	0.247845			1	56	38.1294	10.608	51.2626	915.81	7	0.398587	26.7937			2	109	2.86556	67.804	29.3304	375.46	6	0.535239	10.9848
2	1	50.4984	22.8417	26.6598	164.69	9	0.475952			2	147	25.8393	28.3753	45.7854	2683.56	7	0.398905	78.5126			2	155	3.0235	67.7641	29.2124	2778.6	6	0.537316	81.2932
2	2	47.9578	17.2537	34.7885	143.16	4	0.428599														2	96	1.88062	66.1326	31.9867	297.42	6	0.53861	8.70158
2	3	37.7371	22.1343	40.1285	153.75	7	-0.209152														2	114	2.95247	67.6748	29.3727	1154.06	6	0.539427	33.7642
2	4	39.3709	17.5503	43.0787	149.05	7	-0.0832938														2	161	5.18499	66.5537	28.2613	3099.35	6	0.544559	90.6773
2	5	45.6213	32.9955	21.3832	311.3	11	0.438087														2	124	5.43957	66.0394	28.5211	1059.8	6	0.552108	31.0064
2	6	60.8034	15.2388	23.9578	315.52	2	0.436993														2	128	2.53259	65.1253	32.3421	1191.94	6	0.552876	34.8724
2	7	56.0757	15.3746	28.5497	248.03	9	0.375929														2	159	5.53603	65.8393	28.6246	3112.24	6	0.553913	91.0544
2	8	40.501	22.7359	36.7632	284.96	4	0.512174														1	111	3.45096	67.0718	29.4772	1032.84	6	0.554854	30.2177
2	9	45.7027	17.6923	36.6049	316.21	4	0.571713														1	98	2.59441	66.3458	31.0598	257.22	6	0.555325	7.52545
2	10	59.2991	20.4666	20.2342	313.57	2	0.527196														2	107	3.42782	66.7147	29.8575	367.23	6	0.560905	10.744
2	11	46.0563	20.5169	33.4268	354.62	4	0.501195														2	149	3.61868	64.1311	32.2502	2625.61	6	0.566343	76.8171
2	12	48.5294	18.2296	33.241	423.65	4	0.310223														2	160	5.58434	64.0005	30.4152	3102.88	6	0.567346	90.7806
2	13	46.8584	17.1329	36.0087	449.37	4	0.515424														2	154	3.8809	64.2022	31.9169	2854.52	6	0.569628	83.5143
2	14	51.0937	20.0604	28.8459	327.75	9	0.458211														2	152	4.03599	65.2344	30.7296	2944.78	6	0.573597	86.1551
2	15	58.7549	13.9207	27.3244	314.39	9	0.0486056														1	32	35.1426	16.9054	47.952	1710.02	7	0.416798	50.0298	N
2	16	61.4319	16.1369	22.4312	377.12	2	0.569834														1	53	35.6747	10.0717	54.2536	926.56	7	0.453377	27.1083
2	17	44.3355	19.7324	35.9321	401.3	4	0.597106														1	58	35.7802	10.7526	53.4673	980.85	7	0.460897	28.6966
2	18	59.5638	17.5282	22.908	393.26	2	0.512958														1	54	34.8617	10.163	54.9752	970.89	7	0.46279	28.4052
2	19	21.5183	8.14865	70.3331	280.79	5	0.429655														1	17	25.0048	25.6364	49.3589	2129.93	7	0.471733	62.3151
2	20	46.4975	22.3785	31.1239	499.5	4	0.291466														1	31	25.4375	21.9079	52.6546	1762.74	7	0.491746	51.5723
2	21	55.5864	18.9534	25.4602	497.87	9	0.390299														1	87	29.2215	18.7746	52.0039	20.69	7	0.507352	0.605325
2	22	59.2002	15.9579	24.842	468.5	2	0.223399														1	81	27.2522	21.5119	51.2359	478.01	7	0.510926	13.9851
2	23	43.6083	14.6799	41.7117	424.96	4	0.348627														2	146	33.1401	37.5289	29.3309	2555.36	8	0.409673	74.7618	NM
2	24	45.7875	19.8355	34.377	431.79	4	0.546394														2	47	31.7489	37.9518	30.2993	2728.79	8	0.436082	79.8359
2	25	55.2312	16.8543	27.9145	546	9	0.461197														1	10	29.1676	42.8581	27.9743	2834.4	8	0.540287	82.9257
2	26	48.49	17.9905	33.5195	572.24	4	0.33578														2	136	27.7232	42.8033	29.4736	2497.3	8	0.541748	73.0632
2	27	60.6844	18.6235	20.6921	1234.73	2	0.623037														1	9	27.4863	43.8134	28.7004	2830.24	8	0.549214	82.804
2	28	60.8128	18.6332	20.554	1238.31	2	0.617245														2	53	54.4769	20.7604	24.7628	2364.35	9	0.43756	69.1735	NM
2	29	45.5749	30.4455	23.9796	1191.28	11	0.120908														2	56	51.0766	24.3458	24.5776	3340.5	9	0.444666	97.7326
2	30	52.0669	25.7482	22.185	1187.59	9	0.239681														2	14	51.0937	20.0604	28.8459	327.75	9	0.458211	9.58894
2	31	56.1963	24.5447	19.259	1178.51	2	0.121778														2	25	55.2312	16.8543	27.9145	546	9	0.461197	15.9743
2	32	62.9923	18.1468	18.861	1563.44	2	0.290095														1	13	52.0245	18.4712	29.5043	2112.45	9	0.469	61.8037
2	33	61.9728	18.5405	19.4866	1549.55	2	0.496176														2	1	50.4984	22.8417	26.6598	164.69	9	0.475952	4.81831
2	34	61.1214	17.6677	21.2109	1548.97	2	0.622209														2	37	50.6526	23.2489	26.0985	1575.05	9	0.48805	46.081
2	35	50.428	20.4822	29.0897	1536.23	9	0.367084														2	57	51.4318	21.4626	27.1056	3268.4	9	0.556176	95.6232
2	36	53.8578	18.2471	27.8951	1592.69	9	0.557285														2	36	53.8578	18.2471	27.8951	1592.69	9	0.557285	46.5971
2	37	50.6526	23.2489	26.0985	1575.05	9	0.48805														1	68	53.7228	18.8854	27.3918	700.47	9	0.576307	20.4936
2	38	52.4362	20.0601	27.5036	2728.57	9	0.605535														2	38	52.4362	20.0601	27.5036	2728.57	9	0.605535	79.8294
2	39	42.326	21.083	36.591	2741.33	4	0.595744														1	74	70.297	19.0301	10.6729	735.11	10	0.422333	21.507	NM
2	40	45.8702	23.7984	30.3314	2734.8	4	0.241018														1	72	70.5188	19.7818	9.6994	743.85	10	0.439368	21.7627
2	41	43.5394	23.3224	33.1382	2746.84	4	0.504326														1	73	71.1951	17.5493	11.2556	731.11	10	0.507181	21.39
2	42	35.0159	22.7942	42.1899	2656.49	7	0.141529														1	39	74.6634	13.7686	11.568	1222.9	10	0.54447	35.7782
2	43	31.9336	25.5508	42.5156	2691.39	7	0.244301														1	76	76.0208	13.5809	10.3984	783.65	10	0.550722	22.9272
2	44	47.0791	38.7613	14.1597	2667.21	11	0.660864														2	80	71.6537	17.1613	11.185	3300.06	10	0.552647	96.5494
2	45	61.4848	17.8292	20.686	2764.39	2	0.597916														1	46	75.1196	16.3541	8.52633	1276.03	10	0.57625	37.3327
2	46	39.1178	27.7365	33.1456	2838.21	4	0.411667														2	74	74.7346	14.1156	11.1499	3339.26	10	0.579438	97.6963
2	47	31.7489	37.9518	30.2993	2728.79	8	0.436082														2	61	72.6525	15.9365	11.411	3329.23	10	0.583414	97.4029
2	48	37.7213	37.2435	25.0351	2738.3	8	0.0686857														2	83	72.5918	17.4458	9.96247	3306.57	10	0.614787	96.7399
2	49	40.9	19.1608	39.9392	2494.45	4	0.400629														1	42	73.5772	15.7398	10.683	1337.79	10	0.626433	39.1396
2	50	43.9154	21.1611	34.9235	2434.41	4	0.585581														2	142	54.3185	35.122	10.5596	2567.78	11	0.408927	75.1252	M
2	51	48.4388	17.821	33.7402	2418.39	4	0.352996														2	5	45.6213	32.9955	21.3832	311.3	11	0.438087	9.10767
2	52	54.3034	21.9638	23.7329	2403.96	9	0.346883														2	140	45.8894	37.0458	17.0648	2583.94	11	0.658711	75.598
2	53	54.4769	20.7604	24.7628	2364.35	9	0.43756														2	44	47.0791	38.7613	14.1597	2667.21	11	0.660864	78.0342
2	54	33.3158	22.9995	43.6847	2410.95	7	0.287276														2	144	46.0076	37.4176	16.5748	2549.21	11	0.664806	74.5819
2	55	40.1507	17.0837	42.7657	2404.85	7	-0.161037														2	141	47.2905	37.8671	14.8424	2538	11	0.677044	74.2539
2	56	51.0766	24.3458	24.5776	3340.5	9	0.444666														2	143	48.0505	36.6809	15.2686	2544.94	11	0.681434	74.457
2	57	51.4318	21.4626	27.1056	3268.4	9	0.556176														2	138	46.9512	36.9939	16.0549	2564.76	11	0.682933	75.0369
2	58	48.1184	22.2145	29.6671	3317.93	4	-0.0455176
2	59	61.2708	17.6928	21.0364	3328.16	2	0.61432
2	60	69.4308	20.6719	9.89739	3340.27	10	0.291238
2	61	72.6525	15.9365	11.411	3329.23	10	0.583414
2	62	52.3223	29.6712	18.0065	3315.33	11	0.104416
2	63	66.1254	17.6945	16.1801	3377.49	1	0.592599
2	64	69.0257	16.6329	14.3414	3385.91	1	0.365845
2	65	68.4068	16.4938	15.0994	3369.74	1	0.508215
2	66	64.3387	18.1194	17.5419	3373.89	1	0.215935
2	67	69.4125	17.5763	13.0112	3351.3	1	0.0657004
2	68	68.998	14.766	16.236	3370.26	1	0.438409
2	69	70.2163	18.1308	11.6529	3360.26	10	0.323537
2	70	61.8163	18.9094	19.2743	3370.38	2	0.489313
2	71	61.0008	22.6214	16.3778	3369.71	2	0.166442
2	72	69.1976	15.3478	15.4546	3322.94	1	0.410491
2	73	69.3477	16.8857	13.7667	3302.79	1	0.228639
2	74	74.7346	14.1156	11.1499	3339.26	10	0.579438
2	75	63.5855	17.8455	18.569	3263.12	2	0.118907
2	76	63.6492	17.0926	19.2582	3346.01	2	0.203412
2	77	66.7822	17.4488	15.769	3270.37	1	0.646615
2	78	65.3993	18.6026	15.9982	3308.16	1	0.514044
2	79	66.9871	15.5646	17.4483	3308.82	1	0.5178
2	80	71.6537	17.1613	11.185	3300.06	10	0.552647
2	81	66.7296	18.3118	14.9587	3323.31	1	0.610156
2	82	67.0426	17.9962	14.9612	3351.69	1	0.610566
2	83	72.5918	17.4458	9.96247	3306.57	10	0.614787
2	84	60.3189	17.4781	22.203	3325.76	2	0.616954
2	85	67.7367	16.969	15.2943	3313.46	1	0.586215
2	86	65.2201	17.9215	16.8585	3316.36	1	0.456657
2	87	58.8895	18.4279	22.6826	3297.32	2	0.451901
2	88	56.9389	18.6448	24.4164	3340.04	9	0.077653
2	89	57.5117	19.9489	22.5394	3338.54	2	0.205243
2	90	60.1283	16.8491	23.0226	3303.18	2	0.531841
2	91	61.0845	17.5132	21.4023	3288.66	2	0.623244
2	92	69.9922	13.4123	16.5955	3274.36	1	0.277384
2	93	56.245	17.3227	26.4323	3267.1	9	0.340639
2	94	42.2277	27.2425	30.5298	3269.79	4	0.308591
2	95	3.48254	70.4927	26.0247	283.28	6	0.340381
2	96	1.88062	66.1326	31.9867	297.42	6	0.53861
2	97	3.08306	73.1743	23.7426	333.85	6	-0.0974319
2	98	2.9431	70.1348	26.9221	332.79	6	0.391146
2	99	65.224	18.4306	16.3454	381.85	1	0.481032
2	100	1.64219	77.7397	20.6181	385.22	3	0.619135
2	101	2.61577	73.4156	23.9687	403.86	6	-0.112255
2	102	2.30385	78.5041	19.1921	328.26	3	0.697443
2	103	2.08939	72.6283	25.2824	351.28	6	0.0851159
2	104	3.60739	73.3204	23.0722	389.41	6	-0.16978
2	105	3.1359	78.6254	18.2387	387.58	3	0.722046
2	106	2.86189	77.5489	19.5892	315.39	3	0.658404
2	107	3.42782	66.7147	29.8575	367.23	6	0.560905
2	108	2.59962	75.7043	21.6961	339.86	3	0.473283
2	109	2.86556	67.804	29.3304	375.46	6	0.535239
2	110	5.0642	58.6548	36.281	411.43	6	0.520117
2	111	3.48038	79.6293	16.8903	448.83	3	0.74746
2	112	3.74049	76.0331	20.2264	476.05	3	0.562679
2	113	4.11757	78.8972	16.9852	490.67	3	0.731149
2	114	2.95247	67.6748	29.3727	1154.06	6	0.539427
2	115	2.69312	68.3452	28.9617	1271.14	6	0.513307
2	116	1.9654	70.1921	27.8425	1170.04	6	0.396262
2	117	3.43891	81.6141	14.947	1330.84	3	0.746081
2	118	3.35114	76.6638	19.9851	1244.65	3	0.6075
2	119	3.00214	49.7151	47.2827	1240.07	6	0.365054
2	120	3.56565	81.1264	15.3079	1082.23	3	0.747741
2	121	4.68089	79.2706	16.0485	1074.52	3	0.726899
2	122	39.2945	47.7411	12.9644	1022.26	11	0.159426
2	123	22.3135	59.1976	18.4889	1033.02	8	0.0754278
2	124	5.43957	66.0394	28.5211	1059.8	6	0.552108
2	125	4.00639	81.7306	14.263	1353.32	3	0.734069
2	126	2.62094	84.1056	13.2734	1314.73	3	0.716371
2	127	2.75256	59.8174	37.43	1211.42	6	0.508985
2	128	2.53259	65.1253	32.3421	1191.94	6	0.552876
2	129	2.14649	85.8325	12.021	1307.44	3	0.679041
2	130	2.43403	52.3535	45.2124	1271.79	6	0.42272
2	131	3.6139	54.2963	42.0898	1280.11	6	0.460793
2	132	5.96231	71.4453	22.5924	1552.64	6	0.0165278
2	133	5.73772	67.8554	26.4069	1511.91	6	0.473638
2	134	4.53852	68.7747	26.6868	1539.74	6	0.457701
2	135	33.2153	45.4994	21.2853	2495.23	8	0.36141
2	136	27.7232	42.8033	29.4736	2497.3	8	0.541748
2	137	2.62919	41.4409	55.9299	2517.53	6	-0.115893
2	138	46.9512	36.9939	16.0549	2564.76	11	0.682933
2	139	33.9916	38.2544	27.754	2558.27	8	0.393782
2	140	45.8894	37.0458	17.0648	2583.94	11	0.658711
2	141	47.2905	37.8671	14.8424	2538	11	0.677044
2	142	54.3185	35.122	10.5596	2567.78	11	0.408927
2	143	48.0505	36.6809	15.2686	2544.94	11	0.681434
2	144	46.0076	37.4176	16.5748	2549.21	11	0.664806
2	145	35.9865	37.9888	26.0248	2555.66	8	0.259355
2	146	33.1401	37.5289	29.3309	2555.36	8	0.409673
2	147	25.8393	28.3753	45.7854	2683.56	7	0.398905
2	148	26.1402	31.1597	42.7001	2677.64	7	0.283764
2	149	3.61868	64.1311	32.2502	2625.61	6	0.566343
2	150	41.5629	21.439	36.9981	2773.35	4	0.57474
2	151	3.0287	72.6414	24.3299	2871.44	6	0.0240433
2	152	4.03599	65.2344	30.7296	2944.78	6	0.573597
2	153	4.59723	72.0126	23.3902	2896.36	6	0.0256018
2	154	3.8809	64.2022	31.9169	2854.52	6	0.569628
2	155	3.0235	67.7641	29.2124	2778.6	6	0.537316
2	156	5.21543	77.05	17.7345	2835.14	3	0.655764
2	157	6.37281	68.2006	25.4266	3187.02	6	0.4219
2	158	9.89953	58.5918	31.5087	3199.33	6	0.513904
2	159	5.53603	65.8393	28.6246	3112.24	6	0.553913
2	160	5.58434	64.0005	30.4152	3102.88	6	0.567346
2	161	5.18499	66.5537	28.2613	3099.35	6	0.544559
2	162	4.3373	67.7839	27.8788	3056	6	0.521569
2	163	6.38858	72.8581	20.7533	3197.44	3	0.249924
2	164	8.32914	68.1495	23.5213	3160.04	6	0.310601
2	165	4.25089	78.9203	16.8289	3199.97	3	0.730437
2	166	3.49766	79.7111	16.7912	3130.2	3	0.748206
2	167	4.26519	77.8215	17.9133	3137.6	3	0.695064
2	168	4.98027	76.3174	18.7023	3230.23	3	0.612191
2	169	6.3428	75.8631	17.7941	3085.59	3	0.581858
2	170	4.7789	72.7762	22.4449	3084.73	6	-0.154786
2	171	2.74934	79.1329	18.1177	3065.8	3	0.734119
2	172	4.43489	68.9312	26.6339	3073.38	6	0.449604
2	173	3.91472	71.2684	24.8169	3117.27	6	0.21796
2	174	3.9877	70.4093	25.603	3178.14	6	0.330478
2	175	5.61357	72.932	21.4544	3175.1	3	0.216351
2	176	6.26227	69.7114	24.0263	3312.38	6	0.277341
2	177	4.13695	70.8116	25.0514	3303.85	6	0.271549
2	178	1.77699	38.4811	59.7419	3337.31	5	0.190137
2	179	4.89798	74.2722	20.8299	3327.39	3	0.392457
2	180	1.78261	90.997	7.22035	3340.54	3	0.554195
2	181	17.4853	66.0499	16.4648	3364	6	-0.00995589
2	182	3.82977	38.0823	58.088	3373.74	5	0.170251
2	183	2.70253	80.6697	16.6278	3348.09	3	0.75569

## Sheet: HH20e3
ALL CELLS										Non clone cells (silhouette <0.4)											Clone cells (silhouette >0.4)
Cell Type	Cell ID	C1	C2	C3	Y	Axis level	Clone nb	silhouette_idx9		Cell Type	Cell ID	C1	C2	C3	Y	Axis level	Clone nb	silhouette_idx9			Cell Type	Cell ID	C1	C2	C3	Y	Axis level	Clone nb	silhouette_idx9	Assigned Clone type
1	1	44.9639	19.3107	35.7253	2589.93	66.682	3	0.651451		2	115	5.81368	67.0177	27.1686	1312.95	33.8041	9	-0.243995			2	61	34.6265	41.3156	24.0578	3568.53	91.8777	1	0.460995	NM
1	2	36.7643	22.4568	40.7789	2577.21	66.3545	3	0.291717		2	110	5.32583	67.2114	27.4627	1427.83	36.7618	9	-0.240007			2	53	31.063	35.5102	33.4269	3652.97	94.0518	1	0.475982
1	3	42.1623	18.2985	39.5391	2611.69	67.2423	3	0.62362		2	4	36.1826	20.5134	43.304	465.46	11.984	6	-0.169802			2	51	30.587	35.5471	33.8659	3650.55	93.9894	1	0.480599
1	4	45.1419	19.5253	35.3327	2620.51	67.4694	3	0.64585		2	2	35.81	21.1033	43.0867	458.89	11.8149	6	-0.138194			1	95	28.5336	41.0234	30.4431	3534.04	90.9897	1	0.4815
1	5	27.944	20.7375	51.3185	2653.77	68.3257	6	0.565548		1	23	35.0281	22.886	42.0859	3012.9	77.5721	6	-0.119727			1	98	34.4572	39.1998	26.3431	3588.51	92.3921	1	0.487312
1	6	28.8187	21.4922	49.6891	2664.23	68.595	6	0.538456		1	37	36.9149	16.7308	46.3543	3125.11	80.4611	6	-0.0970689			1	81	29.7385	42.0615	28.2001	3438.63	88.5332	1	0.517445
1	7	24.3456	21.8769	53.7775	2683.18	69.0829	6	0.598797		2	44	60.9551	16.7448	22.3002	3834.65	98.7294	8	-0.0450265			2	57	29.7609	41.9628	28.2763	3525.82	90.7781	1	0.523738
1	8	24.342	23.1757	52.4823	2763.88	71.1607	6	0.601344		2	23	37.7556	37.7181	24.5263	965.86	24.8677	5	-0.0393269			1	96	29.3681	39.5496	31.0823	3543.97	91.2454	1	0.527523
1	9	33.1666	24.4499	42.3836	2774.01	71.4215	6	0.0612263		1	94	23.92	44.5489	31.531	3508.2	90.3244	7	-0.0258851			1	83	29.3222	39.9741	30.7036	3451	88.8517	1	0.527976
1	10	41.9513	20.9822	37.0665	2921.52	75.2194	3	0.651596		1	64	27.0435	46.3886	26.568	3325.69	85.6254	7	-0.0174722			1	99	29.5992	39.7844	30.6164	3591.8	92.4768	1	0.540585
1	11	44.7665	19.3176	35.9158	2930.82	75.4588	3	0.655288		1	65	26.4675	46.1661	27.3664	3299.83	84.9596	7	0.000448942			2	82	30.106	41.513	28.381	3263.68	84.0288	1	0.543507
1	12	34.1077	20.7535	45.1388	2945.75	75.8432	6	0.139648		2	74	26.6446	45.9658	27.3896	3406.08	87.6952	1	0.00170234			2	56	33.9219	39.8172	26.2609	3528.07	90.836	1	0.545275
1	13	30.495	20.586	48.9191	2954.73	76.0744	6	0.46609		1	122	57.6006	31.215	11.1844	807.03	20.7783	5	0.00491101			2	60	33.7874	39.8681	26.3445	3564.76	91.7806	1	0.555611
1	14	47.1108	22.0715	30.8177	2963.95	76.3118	3	0.352554		2	31	34.4872	48.9563	16.5565	3519.79	90.6228	1	0.0120517			2	63	31.2544	41.8665	26.8791	3582.26	92.2312	1	0.557024
1	15	38.4468	19.5462	42.007	2970.85	76.4894	3	0.394805		2	15	49.2395	27.2939	23.4666	853.46	21.9737	5	0.0163002			2	62	33.7413	40.077	26.1818	3572.02	91.9676	1	0.559218
1	16	24.6313	24.2905	51.0782	2969.42	76.4526	6	0.592096		1	72	62.3574	13.7814	23.8612	3323.79	85.5765	8	0.032066			2	87	33.5425	39.6999	26.7576	3293.72	84.8023	1	0.568856
1	17	38.9047	20.7137	40.3816	2982.03	76.7773	3	0.483521		2	86	37.8186	44.1025	18.0789	3297.46	84.8986	1	0.0548736			1	88	32.8871	40.7473	26.3656	3495.94	90.0088	1	0.581942
1	18	52.751	20.4943	26.7548	2989.7	76.9748	4	0.534553		2	7	38.3241	38.541	23.135	482.37	12.4194	5	0.0575287			2	59	32.4664	39.5337	27.9998	3554.28	91.5108	1	0.590541
1	19	46.6562	19.5864	33.7573	2994.14	77.0891	3	0.567736		1	9	33.1666	24.4499	42.3836	2774.01	71.4215	6	0.0612263			1	82	32.6482	39.6473	27.7045	3449.43	88.8113	1	0.591709
1	20	47.5066	18.863	33.6304	2991.11	77.0111	3	0.50545		1	43	48.7888	21.8179	29.3933	3136.24	80.7477	3	0.0676481			2	55	32.3353	39.9286	27.7361	3660.87	94.2551	1	0.592341
1	21	46.5155	20.8852	32.5993	2993.71	77.078	3	0.515771		1	103	28.031	46.3497	25.6193	3634.09	93.5657	1	0.0745919			2	116	5.79819	69.0833	25.1185	1401.54	36.085	2	0.435719	M
1	22	40.1283	20.2702	39.6014	3002.34	77.3002	3	0.581352		2	13	52.7533	28.6699	18.5768	837.98	21.5752	5	0.0779354			2	107	5.82447	69.8344	24.3411	1425.98	36.7142	2	0.520278
1	23	35.0281	22.886	42.0859	3012.9	77.5721	6	-0.119727		2	46	61.827	15.445	22.728	3823.76	98.449	8	0.0795451			2	118	3.25705	72.0463	24.6967	1324.96	34.1133	2	0.609934
1	24	55.5166	16.9545	27.5289	3016.68	77.6694	4	0.656648		1	91	62.1868	14.6405	23.1727	3386.53	87.1918	8	0.0811173			2	111	3.03124	83.0031	13.9656	1291.9	33.2621	2	0.643913
1	25	21.8444	54.8996	23.2559	3009.7	77.4897	7	0.589392		2	33	35.2228	51.8059	12.9714	3509.75	90.3643	7	0.0815342			2	109	5.00202	71.8338	23.1642	1429.97	36.8169	2	0.658249
1	26	19.6577	52.0129	28.3294	3020.85	77.7768	7	0.52955		1	75	61.2636	17.384	21.3523	3383.33	87.1094	8	0.0990217			2	113	4.40326	73.1282	22.4685	1250.03	32.1841	2	0.708721
1	27	21.4564	52.0329	26.5107	3023.25	77.8386	7	0.579987		1	61	60.7165	18.8473	20.4362	3302.94	85.0396	8	0.103245			2	114	4.38856	80.0319	15.5795	1397.36	35.9773	2	0.710979
1	28	20.8172	55.5006	23.6823	3025.46	77.8955	7	0.570635		2	20	34.6656	31.1165	34.218	969.46	24.9604	1	0.103923			2	112	2.69793	78.5566	18.7455	1288.1	33.1643	2	0.740909
1	29	22.7559	53.5186	23.7254	3040.52	78.2832	7	0.599792		1	50	46.3179	25.9833	27.6987	3270.27	84.1985	3	0.10836			2	102	3.72571	77.3341	18.9402	2901.59	74.7062	2	0.763683
1	30	19.928	52.0203	28.0517	3047.76	78.4696	7	0.539691		2	84	31.6634	47.2463	21.0903	3272.36	84.2523	1	0.110636			2	106	4.61047	75.7338	19.6557	1421.31	36.594	2	0.768198
1	31	21.0299	57.091	21.8791	3050.18	78.5319	7	0.544752		4	4	4.06155	40.6949	55.2436	2618.01	67.4049	9	0.121383			2	117	4.7793	75.9999	19.2208	1405.3	36.1818	2	0.769461
1	32	22.7507	51.2049	26.0444	3065.24	78.9197	7	0.573921		1	12	34.1077	20.7535	45.1388	2945.75	75.8432	6	0.139648			1	51	44.7589	24.4604	30.7807	3276.51	84.3592	3	0.405187	NM
1	33	22.2135	52.7852	25.0014	3070.92	79.0659	7	0.597415		2	47	33.2375	56.0738	10.6887	3724.29	95.888	7	0.145601			1	35	39.1788	18.2452	42.576	3104.26	79.9243	3	0.414459
1	34	48.9779	16.9342	34.0879	3066.76	78.9588	3	0.358411		2	48	51.3117	17.6757	31.0126	3635.4	93.5994	4	0.157952			2	36	48.237	15.3748	36.3881	3677.27	94.6774	3	0.451413
1	35	39.1788	18.2452	42.576	3104.26	79.9243	3	0.414459		1	106	24.9209	43.1259	31.9532	3628.71	93.4271	1	0.159563			2	89	47.9105	18.5883	33.5011	3389.18	87.26	3	0.46529
1	36	47.4318	18.2138	34.3544	3119.12	80.3069	3	0.521387		2	32	32.3169	53.6846	13.9985	3521.75	90.6733	7	0.167697			1	17	38.9047	20.7137	40.3816	2982.03	76.7773	3	0.483521
1	37	36.9149	16.7308	46.3543	3125.11	80.4611	6	-0.0970689		1	97	22.8166	46.0376	31.1458	3492.17	89.9117	7	0.181924			2	16	46.3358	13.5397	40.1245	864.94	22.2693	3	0.501341
1	38	27.3932	53.1105	19.4963	3160.02	81.3599	7	0.40373		1	55	60.1169	17.4443	22.4388	3217.38	82.8368	4	0.185527			1	20	47.5066	18.863	33.6304	2991.11	77.0111	3	0.50545
1	39	24.2009	54.2371	21.562	3167.56	81.5541	7	0.561413		2	58	39.072	36.3277	24.6003	3540.53	91.1568	5	0.187606			1	21	46.5155	20.8852	32.5993	2993.71	77.078	3	0.515771
1	40	27.4958	53.5918	18.9124	3171.52	81.656	7	0.39466		1	102	26.0102	43.903	30.0868	3635.21	93.5945	1	0.189852			2	45	45.1918	22.546	32.2622	3871.95	99.6898	3	0.516858
1	41	23.0896	54.9198	21.9906	3167.46	81.5515	7	0.579948		2	14	53.2171	26.0872	20.6957	837.56	21.5644	4	0.203093			1	36	47.4318	18.2138	34.3544	3119.12	80.3069	3	0.521387
1	42	69.8587	16.5943	13.5471	3131.1	80.6153	8	0.519701		2	72	50.9277	12.3816	36.6908	3422.32	88.1133	3	0.226231			2	11	39.1392	21.7902	39.0706	595.66	15.3363	3	0.531149
1	43	48.7888	21.8179	29.3933	3136.24	80.7477	3	0.0676481		2	104	29.9214	46.031	24.0476	3382.78	87.0953	1	0.228039			1	19	46.6562	19.5864	33.7573	2994.14	77.0891	3	0.567736
1	44	58.3399	17.166	24.4941	3158.45	81.3195	4	0.527854		1	53	63.7977	13.2599	22.9424	3210.89	82.6697	8	0.229454			1	22	40.1283	20.2702	39.6014	3002.34	77.3002	3	0.581352
1	45	24.2531	48.4765	27.2704	3227.04	83.0855	7	0.405613		1	110	24.9537	46.9508	28.0955	3651.28	94.0082	7	0.231279			2	12	40.1246	21.0669	38.8085	625.09	16.094	3	0.593369
1	46	24.8279	47.0914	28.0807	3228.21	83.1156	7	0.253473		1	66	27.9007	45.0928	27.0065	3328.83	85.7062	1	0.232044			2	100	46.0818	17.9674	35.9508	2613.39	67.286	3	0.605007
1	47	22.0172	50.9658	27.017	3264.61	84.0528	7	0.561672		2	119	2.81802	65.1729	32.0091	559.1	14.395	9	0.237211			1	113	45.5615	20.2466	34.192	3878.02	99.846	3	0.615311
1	48	23.8919	47.6146	28.4935	3265.39	84.0729	7	0.341837		2	83	36.1464	44.4859	19.3677	3268.73	84.1589	1	0.238737			2	39	45.8765	19.2419	34.8816	3710.38	95.5299	3	0.620515
1	49	51.4607	20.4568	28.0825	3260.97	83.9591	4	0.365006		2	54	34.0995	46.0322	19.8683	3647.88	93.9207	1	0.240336			1	3	42.1623	18.2985	39.5391	2611.69	67.2423	3	0.62362
1	50	46.3179	25.9833	27.6987	3270.27	84.1985	3	0.10836		1	117	49.6316	24.5755	25.7929	1076.06	27.7049	4	0.244163			1	4	45.1419	19.5253	35.3327	2620.51	67.4694	3	0.64585
1	51	44.7589	24.4604	30.7807	3276.51	84.3592	3	0.405187		2	95	24.1895	46.7972	29.0133	2777.62	71.5144	7	0.245618			2	3	44.4359	18.7158	36.8483	470.73	12.1197	3	0.650712
1	52	63.8996	15.0555	21.0449	3214.79	82.7701	8	0.403234		2	35	59.3497	18.6477	22.0026	3650.37	93.9848	4	0.25046			1	1	44.9639	19.3107	35.7253	2589.93	66.682	3	0.651451
1	53	63.7977	13.2599	22.9424	3210.89	82.6697	8	0.229454		1	111	51.8241	17.51	30.6658	3883.3	99.982	4	0.251337			1	10	41.9513	20.9822	37.0665	2921.52	75.2194	3	0.651596
1	54	63.3886	16.5052	20.1062	3217.33	82.8355	8	0.437936		1	46	24.8279	47.0914	28.0807	3228.21	83.1156	7	0.253473			1	11	44.7665	19.3176	35.9158	2930.82	75.4588	3	0.655288
1	55	60.1169	17.4443	22.4388	3217.38	82.8368	4	0.185527		2	98	50.0371	23.1169	26.846	2725.5	70.1725	4	0.257032			2	10	43.7542	19.4028	36.8429	582.16	14.9887	3	0.66081
1	56	61.7292	19.4693	18.8015	3275.96	84.345	8	0.343801		2	52	44.2719	44.1064	11.6217	3660.88	94.2554	5	0.25789			1	79	59.2331	16.7272	24.0396	3419.03	88.0286	4	0.411087	NM
1	57	64.7627	19.6369	15.6004	3282.61	84.5162	8	0.53779		1	118	54.7826	32.7309	12.4865	868.16	22.3522	5	0.258104			2	94	59.426	14.7139	25.8601	3209.93	82.645	4	0.414727
1	58	24.6246	47.0788	28.2966	3291.72	84.7508	7	0.261926		1	58	24.6246	47.0788	28.2966	3291.72	84.7508	7	0.261926			1	71	58.8273	17.9275	23.2453	3318.77	85.4472	4	0.425407
1	59	68.1828	16.3693	15.4479	3282.49	84.5131	8	0.556983		1	100	35.0268	33.4283	31.5449	3574.75	92.0378	1	0.261967			2	81	52.3709	18.684	28.9452	3288.88	84.6777	4	0.429944
1	60	65.1391	16.7794	18.0815	3287.34	84.638	8	0.554321		2	27	32.0077	32.4058	35.5865	1025.88	26.413	1	0.268991			2	76	58.4226	18.1391	23.4383	3414.76	87.9186	4	0.471519
1	61	60.7165	18.8473	20.4362	3302.94	85.0396	8	0.103245		1	80	61.0045	20.7384	18.257	3396.7	87.4537	8	0.281918			2	77	58.7349	16.7496	24.5154	3417.78	87.9964	4	0.485999
1	62	59.3944	17.9537	22.6519	3309.83	85.217	4	0.315422		2	25	39.7884	37.439	22.7726	1004.92	25.8733	5	0.287929			2	91	58.5922	15.2212	26.1866	3431.83	88.3581	4	0.500442
1	63	66.3219	15.5491	18.129	3293.91	84.8072	8	0.55569		1	2	36.7643	22.4568	40.7789	2577.21	66.3545	3	0.291717			1	77	55.5021	21.4226	23.0752	3369.51	86.7536	4	0.503844
1	64	27.0435	46.3886	26.568	3325.69	85.6254	7	-0.0174722		2	103	21.8679	47.2045	30.9277	3379.64	87.0144	7	0.300806			1	90	58.1451	18.0574	23.7976	3389.51	87.2685	4	0.515214
1	65	26.4675	46.1661	27.3664	3299.83	84.9596	7	0.000448942		2	24	40.1333	38.3078	21.5589	1012.11	26.0584	5	0.301042			2	92	52.8499	19.3207	27.8294	3349.17	86.2299	4	0.521156
1	66	27.9007	45.0928	27.0065	3328.83	85.7062	1	0.232044		1	73	56.7369	22.1361	21.127	3373.52	86.8568	4	0.311885			1	78	57.4304	18.9803	23.5893	3413.53	87.887	4	0.526466
1	67	57.0137	16.2352	26.7511	3331.52	85.7755	4	0.607845		1	108	29.8372	45.261	24.9018	3618.63	93.1676	1	0.314288			1	44	58.3399	17.166	24.4941	3158.45	81.3195	4	0.527854
1	68	53.5244	17.7956	28.6799	3340.17	85.9982	4	0.540837		1	62	59.3944	17.9537	22.6519	3309.83	85.217	4	0.315422			1	18	52.751	20.4943	26.7548	2989.7	76.9748	4	0.534553
1	69	54.8441	17.3	27.8559	3336.24	85.897	4	0.64086		1	89	27.7272	43.9375	28.3353	3495.1	89.9871	1	0.315686			1	68	53.5244	17.7956	28.6799	3340.17	85.9982	4	0.540837
1	70	69.0652	14.0761	16.8586	3340.43	86.0049	8	0.524174		1	129	2.74624	18.1342	79.1196	3685.53	94.8901	6	0.316928			2	43	52.8078	20.8648	26.3274	3828.78	98.5783	4	0.541488
1	71	58.8273	17.9275	23.2453	3318.77	85.4472	4	0.425407		2	90	60.1084	14.6743	25.2172	3428.23	88.2654	4	0.318116			1	87	57.7357	16.2057	26.0585	3431.94	88.361	4	0.57602
1	72	62.3574	13.7814	23.8612	3323.79	85.5765	8	0.032066		2	96	26.7773	35.8017	37.421	2778.93	71.5481	1	0.327625			1	67	57.0137	16.2352	26.7511	3331.52	85.7755	4	0.607845
1	73	56.7369	22.1361	21.127	3373.52	86.8568	4	0.311885		1	107	26.5149	41.7506	31.7345	3622.78	93.2745	1	0.335849			2	42	57.2323	17.8325	24.9353	3824.41	98.4658	4	0.60846
1	74	56.2707	17.8567	25.8725	3374.81	86.8901	4	0.657757		2	6	48.9239	17.8438	33.2323	456.92	11.7642	3	0.338625			1	114	56.2383	19.0503	24.7114	3837.42	98.8007	4	0.617062
1	75	61.2636	17.384	21.3523	3383.33	87.1094	8	0.0990217		1	130	9.78708	31.0298	59.1832	3869.02	99.6143	6	0.340344			2	34	53.9465	18.9399	27.1136	3601.9	92.7369	4	0.619303
1	76	73.1276	17.7167	9.15564	3396.03	87.4364	8	0.423734		1	84	28.5115	44.3639	27.1246	3407.25	87.7253	1	0.340373			2	49	54.7063	17.0778	28.2159	3677.78	94.6905	4	0.619853
1	77	55.5021	21.4226	23.0752	3369.51	86.7536	4	0.503844		1	48	23.8919	47.6146	28.4935	3265.39	84.0729	7	0.341837			1	69	54.8441	17.3	27.8559	3336.24	85.897	4	0.64086
1	78	57.4304	18.9803	23.5893	3413.53	87.887	4	0.526466		1	56	61.7292	19.4693	18.8015	3275.96	84.345	8	0.343801			2	80	54.8144	17.3226	27.863	3282.56	84.5149	4	0.64307
1	79	59.2331	16.7272	24.0396	3419.03	88.0286	4	0.411087		2	88	52.2684	17.5271	30.2045	3340.45	86.0054	4	0.344282			1	24	55.5166	16.9545	27.5289	3016.68	77.6694	4	0.656648
1	80	61.0045	20.7384	18.257	3396.7	87.4537	8	0.281918		2	50	59.7995	15.6115	24.589	3589.55	92.4189	4	0.347215			1	74	56.2707	17.8567	25.8725	3374.81	86.8901	4	0.657757
1	81	29.7385	42.0615	28.2001	3438.63	88.5332	1	0.517445		2	65	20.1962	48.3832	31.4206	3508.24	90.3254	7	0.350952			1	86	55.8889	17.2903	26.8208	3427.4	88.2441	4	0.664945
1	82	32.6482	39.6473	27.7045	3449.43	88.8113	1	0.591709		1	14	47.1108	22.0715	30.8177	2963.95	76.3118	3	0.352554			2	19	42.104	38.1813	19.7147	958.68	24.6828	5	0.437091	M
1	83	29.3222	39.9741	30.7036	3451	88.8517	1	0.527976		1	104	29.6536	44.9422	25.4043	3638.21	93.6717	1	0.356009			2	21	49.7007	31.761	18.5384	987.26	25.4186	5	0.446513
1	84	28.5115	44.3639	27.1246	3407.25	87.7253	1	0.340373		1	34	48.9779	16.9342	34.0879	3066.76	78.9588	3	0.358411			2	8	41.736	33.9484	24.3156	475.79	12.25	5	0.460443
1	85	30.921	44.9341	24.1449	3422.81	88.1259	1	0.366716		1	112	62.9093	16.1658	20.9249	3852	99.1761	8	0.358467			2	22	41.9266	33.7048	24.3686	965.54	24.8594	5	0.470038
1	86	55.8889	17.2903	26.8208	3427.4	88.2441	4	0.664945		2	99	58.5567	19.0975	22.3458	2629.83	67.7093	4	0.3609			2	9	42.9135	32.0097	25.0768	449.3	11.568	5	0.475721
1	87	57.7357	16.2057	26.0585	3431.94	88.361	4	0.57602		1	49	51.4607	20.4568	28.0825	3260.97	83.9591	4	0.365006			2	26	43.2723	34.6847	22.043	1012.29	26.0631	5	0.558099
1	88	32.8871	40.7473	26.3656	3495.94	90.0088	1	0.581942		2	85	31.7874	44.8659	23.3467	3278.61	84.4132	1	0.36609			2	41	43.5975	33.9869	22.4156	3776.73	97.2382	5	0.570311
1	89	27.7272	43.9375	28.3353	3495.1	89.9871	1	0.315686		1	85	30.921	44.9341	24.1449	3422.81	88.1259	1	0.366716			2	40	46.3137	35.4008	18.2854	3742.47	96.3561	5	0.582722
1	90	58.1451	18.0574	23.7976	3389.51	87.2685	4	0.515214		1	101	35.525	40.6066	23.8684	3567.53	91.852	1	0.368602			2	28	44.8449	33.5556	21.5995	1036.26	26.6802	5	0.597232
1	91	62.1868	14.6405	23.1727	3386.53	87.1918	8	0.0811173		1	93	29.8963	44.8116	25.2922	3488.01	89.8046	1	0.370145			2	37	11.9768	29.6191	58.404	3628.05	93.4101	6	0.436153	NMP
1	92	27.1356	50.4614	22.403	3433.52	88.4016	7	0.390218		2	1	62.8205	16.6609	20.5187	3217.17	82.8314	8	0.374474			1	13	30.495	20.586	48.9191	2954.73	76.0744	6	0.46609
1	93	29.8963	44.8116	25.2922	3488.01	89.8046	1	0.370145		2	18	51.1038	31.5698	17.3264	865.96	22.2956	5	0.375015			2	30	29.8855	20.9351	49.1793	1058.21	27.2454	6	0.498068
1	94	23.92	44.5489	31.531	3508.2	90.3244	7	-0.0258851		2	101	48.7596	17.4579	33.7825	2623.95	67.5579	3	0.376263			2	97	29.3329	22.1121	48.555	2766.12	71.2183	6	0.504743
1	95	28.5336	41.0234	30.4431	3534.04	90.9897	1	0.4815		2	29	25.2259	29.6387	45.1355	1058.35	27.249	6	0.382194			2	5	28.6327	19.4061	51.9612	467.64	12.0402	6	0.527492
1	96	29.3681	39.5496	31.0823	3543.97	91.2454	1	0.527523		2	71	27.1356	50.4614	22.403	3433.52	88.4016	7	0.386202			1	6	28.8187	21.4922	49.6891	2664.23	68.595	6	0.538456
1	97	22.8166	46.0376	31.1458	3492.17	89.9117	7	0.181924		1	116	42.6572	25.8804	31.4624	1107.78	28.5216	3	0.388369			4	3	18.5981	20.6904	60.7114	2571.56	66.2092	6	0.541833
1	98	34.4572	39.1998	26.3431	3588.51	92.3921	1	0.487312		1	92	27.1356	50.4614	22.403	3433.52	88.4016	7	0.390218			4	2	18.8713	21.2149	59.9139	2587.26	66.6132	6	0.553445
1	99	29.5992	39.7844	30.6164	3591.8	92.4768	1	0.540585		1	109	29.3785	44.4415	26.18	3645.58	93.8615	1	0.391204			1	5	27.944	20.7375	51.3185	2653.77	68.3257	6	0.565548
1	100	35.0268	33.4283	31.5449	3574.75	92.0378	1	0.261967		1	40	27.4958	53.5918	18.9124	3171.52	81.656	7	0.39466			2	17	23.3247	26.1046	50.5707	934.41	24.0579	6	0.572984
1	101	35.525	40.6066	23.8684	3567.53	91.852	1	0.368602		1	15	38.4468	19.5462	42.007	2970.85	76.4894	3	0.394805			4	1	27.1066	21.0279	51.8655	2591.03	66.7104	6	0.581341
1	102	26.0102	43.903	30.0868	3635.21	93.5945	1	0.189852		2	79	62.3899	24.1787	13.4314	3397.13	87.4647	8	0.398479			1	16	24.6313	24.2905	51.0782	2969.42	76.4526	6	0.592096
1	103	28.031	46.3497	25.6193	3634.09	93.5657	1	0.0745919													1	7	24.3456	21.8769	53.7775	2683.18	69.0829	6	0.598797
1	104	29.6536	44.9422	25.4043	3638.21	93.6717	1	0.356009													1	8	24.342	23.1757	52.4823	2763.88	71.1607	6	0.601344
1	105	23.7303	48.5119	27.7578	3642.06	93.7709	7	0.421243													1	38	27.3932	53.1105	19.4963	3160.02	81.3599	7	0.40373	NM
1	106	24.9209	43.1259	31.9532	3628.71	93.4271	1	0.159563													1	45	24.2531	48.4765	27.2704	3227.04	83.0855	7	0.405613
1	107	26.5149	41.7506	31.7345	3622.78	93.2745	1	0.335849													2	105	19.7672	60.1981	20.0347	3416.72	87.9691	7	0.408949
1	108	29.8372	45.261	24.9018	3618.63	93.1676	1	0.314288													1	105	23.7303	48.5119	27.7578	3642.06	93.7709	7	0.421243
1	109	29.3785	44.4415	26.18	3645.58	93.8615	1	0.391204													2	67	25.0893	49.525	25.3857	3468.77	89.3092	7	0.440783
1	110	24.9537	46.9508	28.0955	3651.28	94.0082	7	0.231279													2	75	21.1593	50.3848	28.4559	3406.04	87.6941	7	0.516013
1	111	51.8241	17.51	30.6658	3883.3	99.982	4	0.251337													2	68	25.5428	52.7615	21.6957	3472.1	89.395	7	0.516081
1	112	62.9093	16.1658	20.9249	3852	99.1761	8	0.358467													1	26	19.6577	52.0129	28.3294	3020.85	77.7768	7	0.52955
1	113	45.5615	20.2466	34.192	3878.02	99.846	3	0.615311													1	30	19.928	52.0203	28.0517	3047.76	78.4696	7	0.539691
1	114	56.2383	19.0503	24.7114	3837.42	98.8007	4	0.617062													1	31	21.0299	57.091	21.8791	3050.18	78.5319	7	0.544752
1	115	63.6985	18.7969	17.5046	3818.22	98.3064	8	0.511768													2	64	23.731	51.0809	25.1881	3526.76	90.8023	7	0.559221
1	116	42.6572	25.8804	31.4624	1107.78	28.5216	3	0.388369													2	73	22.6516	50.7419	26.6065	3402.25	87.5965	7	0.559346
1	117	49.6316	24.5755	25.7929	1076.06	27.7049	4	0.244163													1	39	24.2009	54.2371	21.562	3167.56	81.5541	7	0.561413
1	118	54.7826	32.7309	12.4865	868.16	22.3522	5	0.258104													1	47	22.0172	50.9658	27.017	3264.61	84.0528	7	0.561672
1	119	64.8755	26.1261	8.99837	865.85	22.2927	8	0.400114													2	66	22.7149	50.9887	26.2965	3501.31	90.147	7	0.567847
1	120	64.0104	24.3932	11.5965	881.67	22.7001	8	0.433443													1	28	20.8172	55.5006	23.6823	3025.46	77.8955	7	0.570635
1	121	65.7051	18.9597	15.3352	835.92	21.5221	8	0.547761													1	32	22.7507	51.2049	26.0444	3065.24	78.9197	7	0.573921
1	122	57.6006	31.215	11.1844	807.03	20.7783	5	0.00491101													1	41	23.0896	54.9198	21.9906	3167.46	81.5515	7	0.579948
1	123	66.2799	23.8422	9.87795	851.62	21.9264	8	0.44353													1	27	21.4564	52.0329	26.5107	3023.25	77.8386	7	0.579987
1	124	64.8156	15.2655	19.9189	1296.53	33.3813	8	0.491477													1	25	21.8444	54.8996	23.2559	3009.7	77.4897	7	0.589392
1	125	3.65735	61.6247	34.718	3452.57	88.8921	9	0.508159													2	69	22.0886	54.7661	23.1452	3433.37	88.3978	7	0.591849
1	126	3.74548	58.5434	37.7112	3443.45	88.6573	9	0.586087													2	70	22.7771	54.5109	22.712	3455.73	88.9735	7	0.592406
1	127	7.19676	55.8411	36.9621	3525.22	90.7626	9	0.507624													1	33	22.2135	52.7852	25.0014	3070.92	79.0659	7	0.597415
1	128	4.9659	58.7356	36.2985	3537.03	91.0667	9	0.583553													1	29	22.7559	53.5186	23.7254	3040.52	78.2832	7	0.599792
1	129	2.74624	18.1342	79.1196	3685.53	94.8901	6	0.316928													1	119	64.8755	26.1261	8.99837	865.85	22.2927	8	0.400114	NM
1	130	9.78708	31.0298	59.1832	3869.02	99.6143	6	0.340344													1	52	63.8996	15.0555	21.0449	3214.79	82.7701	8	0.403234
2	1	62.8205	16.6609	20.5187	3217.17	82.8314	8	0.374474													1	76	73.1276	17.7167	9.15564	3396.03	87.4364	8	0.423734
2	2	35.81	21.1033	43.0867	458.89	11.8149	6	-0.138194													1	120	64.0104	24.3932	11.5965	881.67	22.7001	8	0.433443
2	3	44.4359	18.7158	36.8483	470.73	12.1197	3	0.650712													1	54	63.3886	16.5052	20.1062	3217.33	82.8355	8	0.437936
2	4	36.1826	20.5134	43.304	465.46	11.984	6	-0.169802													1	123	66.2799	23.8422	9.87795	851.62	21.9264	8	0.44353
2	5	28.6327	19.4061	51.9612	467.64	12.0402	6	0.527492													1	124	64.8156	15.2655	19.9189	1296.53	33.3813	8	0.491477
2	6	48.9239	17.8438	33.2323	456.92	11.7642	3	0.338625													2	78	63.4549	19.902	16.6432	3396.64	87.4521	8	0.501175
2	7	38.3241	38.541	23.135	482.37	12.4194	5	0.0575287													1	115	63.6985	18.7969	17.5046	3818.22	98.3064	8	0.511768
2	8	41.736	33.9484	24.3156	475.79	12.25	5	0.460443													1	42	69.8587	16.5943	13.5471	3131.1	80.6153	8	0.519701
2	9	42.9135	32.0097	25.0768	449.3	11.568	5	0.475721													1	70	69.0652	14.0761	16.8586	3340.43	86.0049	8	0.524174
2	10	43.7542	19.4028	36.8429	582.16	14.9887	3	0.66081													2	38	67.2847	14.4054	18.3099	3714.01	95.6233	8	0.532398
2	11	39.1392	21.7902	39.0706	595.66	15.3363	3	0.531149													1	57	64.7627	19.6369	15.6004	3282.61	84.5162	8	0.53779
2	12	40.1246	21.0669	38.8085	625.09	16.094	3	0.593369													1	121	65.7051	18.9597	15.3352	835.92	21.5221	8	0.547761
2	13	52.7533	28.6699	18.5768	837.98	21.5752	5	0.0779354													1	60	65.1391	16.7794	18.0815	3287.34	84.638	8	0.554321
2	14	53.2171	26.0872	20.6957	837.56	21.5644	4	0.203093													1	63	66.3219	15.5491	18.129	3293.91	84.8072	8	0.55569
2	15	49.2395	27.2939	23.4666	853.46	21.9737	5	0.0163002													1	59	68.1828	16.3693	15.4479	3282.49	84.5131	8	0.556983
2	16	46.3358	13.5397	40.1245	864.94	22.2693	3	0.501341													2	93	67.5364	16.1973	16.2663	3214.47	82.7618	8	0.565319
2	17	23.3247	26.1046	50.5707	934.41	24.0579	6	0.572984													2	120	3.35145	51.0647	45.5838	575.16	14.8084	9	0.455652	NM
2	18	51.1038	31.5698	17.3264	865.96	22.2956	5	0.375015													1	127	7.19676	55.8411	36.9621	3525.22	90.7626	9	0.507624
2	19	42.104	38.1813	19.7147	958.68	24.6828	5	0.437091													1	125	3.65735	61.6247	34.718	3452.57	88.8921	9	0.508159
2	20	34.6656	31.1165	34.218	969.46	24.9604	1	0.103923													2	108	5.43005	60.6135	33.9564	1423.46	36.6493	9	0.518186
2	21	49.7007	31.761	18.5384	987.26	25.4186	5	0.446513													1	128	4.9659	58.7356	36.2985	3537.03	91.0667	9	0.583553
2	22	41.9266	33.7048	24.3686	965.54	24.8594	5	0.470038													1	126	3.74548	58.5434	37.7112	3443.45	88.6573	9	0.586087
2	23	37.7556	37.7181	24.5263	965.86	24.8677	5	-0.0393269
2	24	40.1333	38.3078	21.5589	1012.11	26.0584	5	0.301042
2	25	39.7884	37.439	22.7726	1004.92	25.8733	5	0.287929
2	26	43.2723	34.6847	22.043	1012.29	26.0631	5	0.558099
2	27	32.0077	32.4058	35.5865	1025.88	26.413	1	0.268991
2	28	44.8449	33.5556	21.5995	1036.26	26.6802	5	0.597232
2	29	25.2259	29.6387	45.1355	1058.35	27.249	6	0.382194
2	30	29.8855	20.9351	49.1793	1058.21	27.2454	6	0.498068
2	31	34.4872	48.9563	16.5565	3519.79	90.6228	1	0.0120517
2	32	32.3169	53.6846	13.9985	3521.75	90.6733	7	0.167697
2	33	35.2228	51.8059	12.9714	3509.75	90.3643	7	0.0815342
2	34	53.9465	18.9399	27.1136	3601.9	92.7369	4	0.619303
2	35	59.3497	18.6477	22.0026	3650.37	93.9848	4	0.25046
2	36	48.237	15.3748	36.3881	3677.27	94.6774	3	0.451413
2	37	11.9768	29.6191	58.404	3628.05	93.4101	6	0.436153
2	38	67.2847	14.4054	18.3099	3714.01	95.6233	8	0.532398
2	39	45.8765	19.2419	34.8816	3710.38	95.5299	3	0.620515
2	40	46.3137	35.4008	18.2854	3742.47	96.3561	5	0.582722
2	41	43.5975	33.9869	22.4156	3776.73	97.2382	5	0.570311
2	42	57.2323	17.8325	24.9353	3824.41	98.4658	4	0.60846
2	43	52.8078	20.8648	26.3274	3828.78	98.5783	4	0.541488
2	44	60.9551	16.7448	22.3002	3834.65	98.7294	8	-0.0450265
2	45	45.1918	22.546	32.2622	3871.95	99.6898	3	0.516858
2	46	61.827	15.445	22.728	3823.76	98.449	8	0.0795451
2	47	33.2375	56.0738	10.6887	3724.29	95.888	7	0.145601
2	48	51.3117	17.6757	31.0126	3635.4	93.5994	4	0.157952
2	49	54.7063	17.0778	28.2159	3677.78	94.6905	4	0.619853
2	50	59.7995	15.6115	24.589	3589.55	92.4189	4	0.347215
2	51	30.587	35.5471	33.8659	3650.55	93.9894	1	0.480599
2	52	44.2719	44.1064	11.6217	3660.88	94.2554	5	0.25789
2	53	31.063	35.5102	33.4269	3652.97	94.0518	1	0.475982
2	54	34.0995	46.0322	19.8683	3647.88	93.9207	1	0.240336
2	55	32.3353	39.9286	27.7361	3660.87	94.2551	1	0.592341
2	56	33.9219	39.8172	26.2609	3528.07	90.836	1	0.545275
2	57	29.7609	41.9628	28.2763	3525.82	90.7781	1	0.523738
2	58	39.072	36.3277	24.6003	3540.53	91.1568	5	0.187606
2	59	32.4664	39.5337	27.9998	3554.28	91.5108	1	0.590541
2	60	33.7874	39.8681	26.3445	3564.76	91.7806	1	0.555611
2	61	34.6265	41.3156	24.0578	3568.53	91.8777	1	0.460995
2	62	33.7413	40.077	26.1818	3572.02	91.9676	1	0.559218
2	63	31.2544	41.8665	26.8791	3582.26	92.2312	1	0.557024
2	64	23.731	51.0809	25.1881	3526.76	90.8023	7	0.559221
2	65	20.1962	48.3832	31.4206	3508.24	90.3254	7	0.350952
2	66	22.7149	50.9887	26.2965	3501.31	90.147	7	0.567847
2	67	25.0893	49.525	25.3857	3468.77	89.3092	7	0.440783
2	68	25.5428	52.7615	21.6957	3472.1	89.395	7	0.516081
2	69	22.0886	54.7661	23.1452	3433.37	88.3978	7	0.591849
2	70	22.7771	54.5109	22.712	3455.73	88.9735	7	0.592406
2	71	27.1356	50.4614	22.403	3433.52	88.4016	7	0.386202
2	72	50.9277	12.3816	36.6908	3422.32	88.1133	3	0.226231
2	73	22.6516	50.7419	26.6065	3402.25	87.5965	7	0.559346
2	74	26.6446	45.9658	27.3896	3406.08	87.6952	1	0.00170234
2	75	21.1593	50.3848	28.4559	3406.04	87.6941	7	0.516013
2	76	58.4226	18.1391	23.4383	3414.76	87.9186	4	0.471519
2	77	58.7349	16.7496	24.5154	3417.78	87.9964	4	0.485999
2	78	63.4549	19.902	16.6432	3396.64	87.4521	8	0.501175
2	79	62.3899	24.1787	13.4314	3397.13	87.4647	8	0.398479
2	80	54.8144	17.3226	27.863	3282.56	84.5149	4	0.64307
2	81	52.3709	18.684	28.9452	3288.88	84.6777	4	0.429944
2	82	30.106	41.513	28.381	3263.68	84.0288	1	0.543507
2	83	36.1464	44.4859	19.3677	3268.73	84.1589	1	0.238737
2	84	31.6634	47.2463	21.0903	3272.36	84.2523	1	0.110636
2	85	31.7874	44.8659	23.3467	3278.61	84.4132	1	0.36609
2	86	37.8186	44.1025	18.0789	3297.46	84.8986	1	0.0548736
2	87	33.5425	39.6999	26.7576	3293.72	84.8023	1	0.568856
2	88	52.2684	17.5271	30.2045	3340.45	86.0054	4	0.344282
2	89	47.9105	18.5883	33.5011	3389.18	87.26	3	0.46529
2	90	60.1084	14.6743	25.2172	3428.23	88.2654	4	0.318116
2	91	58.5922	15.2212	26.1866	3431.83	88.3581	4	0.500442
2	92	52.8499	19.3207	27.8294	3349.17	86.2299	4	0.521156
2	93	67.5364	16.1973	16.2663	3214.47	82.7618	8	0.565319
2	94	59.426	14.7139	25.8601	3209.93	82.645	4	0.414727
2	95	24.1895	46.7972	29.0133	2777.62	71.5144	7	0.245618
2	96	26.7773	35.8017	37.421	2778.93	71.5481	1	0.327625
2	97	29.3329	22.1121	48.555	2766.12	71.2183	6	0.504743
2	98	50.0371	23.1169	26.846	2725.5	70.1725	4	0.257032
2	99	58.5567	19.0975	22.3458	2629.83	67.7093	4	0.3609
2	100	46.0818	17.9674	35.9508	2613.39	67.286	3	0.605007
2	101	48.7596	17.4579	33.7825	2623.95	67.5579	3	0.376263
2	102	3.72571	77.3341	18.9402	2901.59	74.7062	2	0.763683
2	103	21.8679	47.2045	30.9277	3379.64	87.0144	7	0.300806
2	104	29.9214	46.031	24.0476	3382.78	87.0953	1	0.228039
2	105	19.7672	60.1981	20.0347	3416.72	87.9691	7	0.408949
2	106	4.61047	75.7338	19.6557	1421.31	36.594	2	0.768198
2	107	5.82447	69.8344	24.3411	1425.98	36.7142	2	0.520278
2	108	5.43005	60.6135	33.9564	1423.46	36.6493	9	0.518186
2	109	5.00202	71.8338	23.1642	1429.97	36.8169	2	0.658249
2	110	5.32583	67.2114	27.4627	1427.83	36.7618	9	-0.240007
2	111	3.03124	83.0031	13.9656	1291.9	33.2621	2	0.643913
2	112	2.69793	78.5566	18.7455	1288.1	33.1643	2	0.740909
2	113	4.40326	73.1282	22.4685	1250.03	32.1841	2	0.708721
2	114	4.38856	80.0319	15.5795	1397.36	35.9773	2	0.710979
2	115	5.81368	67.0177	27.1686	1312.95	33.8041	9	-0.243995
2	116	5.79819	69.0833	25.1185	1401.54	36.085	2	0.435719
2	117	4.7793	75.9999	19.2208	1405.3	36.1818	2	0.769461
2	118	3.25705	72.0463	24.6967	1324.96	34.1133	2	0.609934
2	119	2.81802	65.1729	32.0091	559.1	14.395	9	0.237211
2	120	3.35145	51.0647	45.5838	575.16	14.8084	9	0.455652
4	1	27.1066	21.0279	51.8655	2591.03	66.7104	6	0.581341
4	2	18.8713	21.2149	59.9139	2587.26	66.6132	6	0.553445
4	3	18.5981	20.6904	60.7114	2571.56	66.2092	6	0.541833
4	4	4.06155	40.6949	55.2436	2618.01	67.4049	9	0.121383

## Sheet: HH20e4
ALL CELLS										Non clone cells (silhouette <0.4)											Clone cells (silhouette >0.4)
Cell Type	Cell ID	C1	C2	C3	Y	Axis level	Clone nb	silhouette_idx11		Cell Type	Cell ID	C1	C2	C3	Y	Axis level	Clone nb	silhouette_idx11			Cell Type	Cell ID	C1	C2	C3	Y	Axis level	Clone nb	silhouette_idx11	Assigned Clone type
1	1	7.40746	74.3885	18.2041	13	0.335311	2	0.684923		2	38	43.3308	28.0753	28.5939	3862.45	99.6247	6	0.0472898			2	10	47.6004	22.0495	30.3501	181.6	4.68403	1	0.427167	MP
1	2	8.49133	74.6245	16.8841	425.23	10.968	2	0.646597		2	42	49.1527	23.3087	27.5386	3711.62	95.7343	6	0.0557779			4	4	43.5817	24.0033	32.4149	3272.93	84.4191	1	0.635453
1	3	3.84523	82.8536	13.3011	615.47	15.8749	11	0.501252		2	2	50.7169	22.7257	26.5575	246.6	6.36059	6	0.0581523			2	6	44.1235	21.9793	33.8972	180.68	4.6603	1	0.718229
1	4	5.25245	86.189	8.55859	620.22	15.9974	11	0.721962		1	8	5.54641	79.1743	15.2793	658.6	16.9874	2	0.0699517			2	3	45.0516	22.465	32.4834	179.79	4.63735	1	0.743062
1	5	5.83632	81.7066	12.4571	620.54	16.0057	11	0.408476		1	23	59.5007	22.0921	18.4071	206.85	5.33531	7	0.118507			2	71	5.59304	76.8281	17.5789	508.93	13.1269	2	0.49101	NM
1	6	5.38828	82.9572	11.6546	599.88	15.4728	11	0.557279		2	24	67.3335	19.6216	13.0449	1406.12	36.2682	4	0.143109			2	67	8.56984	76.1703	15.2598	472.25	12.1808	2	0.491291
1	7	4.76276	81.2136	14.0236	626.96	16.1713	11	0.283692		2	22	59.0597	18.8831	22.0572	1072.49	27.6629	5	0.149156			1	19	3.14826	71.7109	25.1408	1187.13	30.6198	2	0.580317
1	8	5.54641	79.1743	15.2793	658.6	16.9874	2	0.0699517		2	37	58.4889	22.0405	19.4707	3854.96	99.4315	5	0.18985			1	2	8.49133	74.6245	16.8841	425.23	10.968	2	0.646597
1	9	4.19707	87.488	8.31489	666.55	17.1924	11	0.75169		2	11	44.0535	33.0281	22.9185	488.67	12.6043	6	0.193067			2	66	5.10627	73.1053	21.7885	502.52	12.9616	2	0.682166
1	10	5.46124	87.1981	7.34067	668.78	17.2499	11	0.720678		2	16	31.6679	41.3716	26.9605	451.24	11.6389	9	0.218359			1	1	7.40746	74.3885	18.2041	13	0.335311	2	0.684923
1	11	5.9624	81.9257	12.1119	647.99	16.7137	11	0.440861		1	24	36.2756	29.6931	34.0313	142.85	3.68455	10	0.23138			2	70	8.57793	68.4534	22.9687	477.36	12.3126	2	0.695062
1	12	3.75615	87.2604	8.98349	654.64	16.8852	11	0.753989		2	30	68.4238	17.9509	13.6254	2650.36	68.3611	4	0.244778			2	69	8.409	68.6734	22.9176	470.02	12.1233	2	0.7002
1	13	2.26234	88.6521	9.08557	1072.53	27.6639	11	0.736502		2	20	63.6466	23.906	12.4474	1014.03	26.155	7	0.250748			1	25	8.88644	70.6201	20.4935	438.23	11.3033	2	0.729588
1	14	1.91213	92.0054	6.08252	1110.6	28.6459	11	0.672109		2	33	58.1695	22.3943	19.4362	3826.22	98.6902	5	0.259985			2	68	8.25328	72.9161	18.8307	483.49	12.4707	2	0.732364
1	15	2.16515	90.884	6.95084	1166.42	30.0856	11	0.701223		1	7	4.76276	81.2136	14.0236	626.96	16.1713	11	0.283692			2	64	6.88185	72.3422	20.776	488.41	12.5976	2	0.734358
1	16	1.88903	92.673	5.43794	1120.06	28.8899	11	0.65146		2	15	46.8215	39.4656	13.7129	526.61	13.5829	9	0.29206			2	55	3.47902	37.6959	58.8251	3820.47	98.5419	3	0.802544	M
1	17	2.45944	87.3947	10.1458	1146.95	29.5834	11	0.735637		2	50	45.5461	38.116	16.338	3306.44	85.2835	9	0.2953			2	57	2.55203	45.4271	52.0209	3876.66	99.9912	3	0.847498
1	18	71.25	22.1432	6.6068	1032.06	26.6201	4	0.529791		2	32	53.5384	19.0019	27.4596	2881.63	74.3263	5	0.300864			2	56	4.36893	43.5003	52.1308	3871.88	99.8679	3	0.882209
1	19	3.14826	71.7109	25.1408	1187.13	30.6198	2	0.580317		2	63	38.1283	50.1525	11.7192	803.38	20.7217	8	0.316676			2	53	4.45071	40.3426	55.2067	3828.84	98.7578	3	0.888665
1	20	75.4137	18.0921	6.4942	153.63	3.9626	4	0.514813		2	48	57.7662	22.7748	19.4591	3314.24	85.4847	5	0.335021			2	54	4.37287	40.5966	55.0305	3827.4	98.7207	3	0.893351
1	21	70.9732	17.337	11.6898	171.62	4.42662	4	0.540687		2	18	38.1433	37.7433	24.1134	495.96	12.7924	9	0.35482			2	52	3.59848	43.1343	53.2672	3858.01	99.5102	3	0.896369
1	22	48.6834	25.5506	25.766	184.53	4.75961	6	0.485909		2	5	57.758	22.5392	19.7027	131.17	3.38329	5	0.356131			1	20	75.4137	18.0921	6.4942	153.63	3.9626	4	0.514813	NM
1	23	59.5007	22.0921	18.4071	206.85	5.33531	7	0.118507		2	36	67.6908	23.1829	9.12631	3836.39	98.9525	4	0.371985			1	18	71.25	22.1432	6.6068	1032.06	26.6201	4	0.529791
1	24	36.2756	29.6931	34.0313	142.85	3.68455	10	0.23138		2	23	54.3307	18.8509	26.8185	1369.52	35.3242	5	0.374766			2	28	69.6365	19.0243	11.3392	1363.73	35.1749	4	0.540031
1	25	8.88644	70.6201	20.4935	438.23	11.3033	2	0.729588													1	21	70.9732	17.337	11.6898	171.62	4.42662	4	0.540687
1	26	64.7855	19.1818	16.0328	1287.73	33.2146	7	0.576095													2	19	70.9598	18.9877	10.0525	973.17	25.1011	4	0.613431
1	27	30.1686	30.7379	39.0935	3587.94	92.5442	10	0.805403													2	12	53.4085	25.5512	21.0403	490.16	12.6428	5	0.42561	MP
2	1	55.7661	19.7162	24.5177	247.01	6.37116	5	0.506466													2	44	53.5797	25.7715	20.6488	3536.93	91.2285	5	0.430928
2	2	50.7169	22.7257	26.5575	246.6	6.36059	6	0.0581523													2	29	53.4271	23.3813	23.1916	1369.83	35.3322	5	0.470438
2	3	45.0516	22.465	32.4834	179.79	4.63735	1	0.743062													2	21	57.2133	21.9493	20.8373	1019.69	26.301	5	0.489947
2	4	47.3037	28.1899	24.5064	114.44	2.95177	6	0.544845													2	8	53.7082	24.7748	21.517	114.66	2.95744	5	0.49913
2	5	57.758	22.5392	19.7027	131.17	3.38329	5	0.356131													2	1	55.7661	19.7162	24.5177	247.01	6.37116	5	0.506466
2	6	44.1235	21.9793	33.8972	180.68	4.6603	1	0.718229													2	14	54.3466	24.6043	21.0491	484.77	12.5037	5	0.563479
2	7	48.5163	27.3268	24.157	180.01	4.64302	6	0.526931													2	43	54.4134	22.8797	22.7069	3536.17	91.2089	5	0.601268
2	8	53.7082	24.7748	21.517	114.66	2.95744	5	0.49913													4	6	55.5332	21.8508	22.6159	3298.35	85.0749	5	0.628997
2	9	63.5102	19.0317	17.4582	143.05	3.68971	7	0.717889													2	31	55.1559	21.9574	22.8868	2650.35	68.3608	5	0.638565
2	10	47.6004	22.0495	30.3501	181.6	4.68403	1	0.427167													2	40	44.3232	29.852	25.8248	3704.12	95.5409	6	0.406677	NMP
2	11	44.0535	33.0281	22.9185	488.67	12.6043	6	0.193067													1	22	48.6834	25.5506	25.766	184.53	4.75961	6	0.485909
2	12	53.4085	25.5512	21.0403	490.16	12.6428	5	0.42561													4	1	48.5985	25.6945	25.707	3286.53	84.7698	6	0.496483
2	13	61.2093	21.2537	17.537	476.37	12.2871	7	0.535402													2	7	48.5163	27.3268	24.157	180.01	4.64302	6	0.526931
2	14	54.3466	24.6043	21.0491	484.77	12.5037	5	0.563479													2	4	47.3037	28.1899	24.5064	114.44	2.95177	6	0.544845
2	15	46.8215	39.4656	13.7129	526.61	13.5829	9	0.29206													2	35	64.0284	22.2067	13.7649	3843.69	99.1408	7	0.401947	NMP
2	16	31.6679	41.3716	26.9605	451.24	11.6389	9	0.218359													2	49	66.1645	15.912	17.9235	3303.89	85.2177	7	0.407053
2	17	37.1821	40.9446	21.8733	467.21	12.0508	9	0.518097													2	25	62.4576	17.7633	19.7791	1395.57	35.9961	7	0.494055
2	18	38.1433	37.7433	24.1134	495.96	12.7924	9	0.35482													2	46	61.2839	22.2306	16.4855	3516.35	90.6977	7	0.514463
2	19	70.9598	18.9877	10.0525	973.17	25.1011	4	0.613431													2	34	61.7548	19.1352	19.11	3836.33	98.951	7	0.526045
2	20	63.6466	23.906	12.4474	1014.03	26.155	7	0.250748													2	13	61.2093	21.2537	17.537	476.37	12.2871	7	0.535402
2	21	57.2133	21.9493	20.8373	1019.69	26.301	5	0.489947													1	26	64.7855	19.1818	16.0328	1287.73	33.2146	7	0.576095
2	22	59.0597	18.8831	22.0572	1072.49	27.6629	5	0.149156													2	45	63.7833	17.2785	18.9381	3526.12	90.9497	7	0.602884
2	23	54.3307	18.8509	26.8185	1369.52	35.3242	5	0.374766													2	51	64.5989	19.0937	16.3073	3324.04	85.7374	7	0.609733
2	24	67.3335	19.6216	13.0449	1406.12	36.2682	4	0.143109													4	5	62.266	21.5263	16.2078	3307.18	85.3027	7	0.633659
2	25	62.4576	17.7633	19.7791	1395.57	35.9961	7	0.494055													2	47	63.0403	21.1921	15.7677	3306.08	85.2742	7	0.661617
2	26	63.1667	19.2289	17.6044	1428.74	36.8517	7	0.716551													2	41	63.5121	20.4766	16.0113	3724.69	96.0714	7	0.673507
2	27	63.3058	18.9857	17.7084	1422.69	36.6956	7	0.715785													2	39	63.3788	18.7571	17.8641	3782.28	97.5569	7	0.705728
2	28	69.6365	19.0243	11.3392	1363.73	35.1749	4	0.540031													2	27	63.3058	18.9857	17.7084	1422.69	36.6956	7	0.715785
2	29	53.4271	23.3813	23.1916	1369.83	35.3322	5	0.470438													2	26	63.1667	19.2289	17.6044	1428.74	36.8517	7	0.716551
2	30	68.4238	17.9509	13.6254	2650.36	68.3611	4	0.244778													2	9	63.5102	19.0317	17.4582	143.05	3.68971	7	0.717889
2	31	55.1559	21.9574	22.8868	2650.35	68.3608	5	0.638565													2	62	27.8184	53.5072	18.6743	799.34	20.6175	8	0.533326	M
2	32	53.5384	19.0019	27.4596	2881.63	74.3263	5	0.300864													2	60	34.9799	54.958	10.0621	777.37	20.0508	8	0.628156
2	33	58.1695	22.3943	19.4362	3826.22	98.6902	5	0.259985													2	61	29.7408	58.8386	11.4206	796.96	20.5561	8	0.731407
2	34	61.7548	19.1352	19.11	3836.33	98.951	7	0.526045													2	59	28.8621	57.3934	13.7445	774.2	19.969	8	0.735637
2	35	64.0284	22.2067	13.7649	3843.69	99.1408	7	0.401947													2	58	29.8356	56.4083	13.7561	773.73	19.9569	8	0.742188
2	36	67.6908	23.1829	9.12631	3836.39	98.9525	4	0.371985													2	17	37.1821	40.9446	21.8733	467.21	12.0508	9	0.518097
2	37	58.4889	22.0405	19.4707	3854.96	99.4315	5	0.18985													4	2	30.2851	27.8321	41.8828	3355.38	86.5457	10	0.7485	NP
2	38	43.3308	28.0753	28.5939	3862.45	99.6247	6	0.0472898													1	27	30.1686	30.7379	39.0935	3587.94	92.5442	10	0.805403
2	39	63.3788	18.7571	17.8641	3782.28	97.5569	7	0.705728													4	3	29.6542	29.837	40.5088	3246.06	83.7262	10	0.833643
2	40	44.3232	29.852	25.8248	3704.12	95.5409	6	0.406677													4	7	29.7577	29.9629	40.2795	3231.28	83.345	10	0.835894
2	41	63.5121	20.4766	16.0113	3724.69	96.0714	7	0.673507													1	5	5.83632	81.7066	12.4571	620.54	16.0057	11	0.408476	NM
2	42	49.1527	23.3087	27.5386	3711.62	95.7343	6	0.0557779													1	11	5.9624	81.9257	12.1119	647.99	16.7137	11	0.440861
2	43	54.4134	22.8797	22.7069	3536.17	91.2089	5	0.601268													1	3	3.84523	82.8536	13.3011	615.47	15.8749	11	0.501252
2	44	53.5797	25.7715	20.6488	3536.93	91.2285	5	0.430928													1	6	5.38828	82.9572	11.6546	599.88	15.4728	11	0.557279
2	45	63.7833	17.2785	18.9381	3526.12	90.9497	7	0.602884													1	16	1.88903	92.673	5.43794	1120.06	28.8899	11	0.65146
2	46	61.2839	22.2306	16.4855	3516.35	90.6977	7	0.514463													1	14	1.91213	92.0054	6.08252	1110.6	28.6459	11	0.672109
2	47	63.0403	21.1921	15.7677	3306.08	85.2742	7	0.661617													2	65	4.40433	84.9211	10.6745	484.54	12.4978	11	0.685371
2	48	57.7662	22.7748	19.4591	3314.24	85.4847	5	0.335021													1	15	2.16515	90.884	6.95084	1166.42	30.0856	11	0.701223
2	49	66.1645	15.912	17.9235	3303.89	85.2177	7	0.407053													1	10	5.46124	87.1981	7.34067	668.78	17.2499	11	0.720678
2	50	45.5461	38.116	16.338	3306.44	85.2835	9	0.2953													1	4	5.25245	86.189	8.55859	620.22	15.9974	11	0.721962
2	51	64.5989	19.0937	16.3073	3324.04	85.7374	7	0.609733													1	17	2.45944	87.3947	10.1458	1146.95	29.5834	11	0.735637
2	52	3.59848	43.1343	53.2672	3858.01	99.5102	3	0.896369													1	13	2.26234	88.6521	9.08557	1072.53	27.6639	11	0.736502
2	53	4.45071	40.3426	55.2067	3828.84	98.7578	3	0.888665													1	9	4.19707	87.488	8.31489	666.55	17.1924	11	0.75169
2	54	4.37287	40.5966	55.0305	3827.4	98.7207	3	0.893351													1	12	3.75615	87.2604	8.98349	654.64	16.8852	11	0.753989
2	55	3.47902	37.6959	58.8251	3820.47	98.5419	3	0.802544
2	56	4.36893	43.5003	52.1308	3871.88	99.8679	3	0.882209
2	57	2.55203	45.4271	52.0209	3876.66	99.9912	3	0.847498
2	58	29.8356	56.4083	13.7561	773.73	19.9569	8	0.742188
2	59	28.8621	57.3934	13.7445	774.2	19.969	8	0.735637
2	60	34.9799	54.958	10.0621	777.37	20.0508	8	0.628156
2	61	29.7408	58.8386	11.4206	796.96	20.5561	8	0.731407
2	62	27.8184	53.5072	18.6743	799.34	20.6175	8	0.533326
2	63	38.1283	50.1525	11.7192	803.38	20.7217	8	0.316676
2	64	6.88185	72.3422	20.776	488.41	12.5976	2	0.734358
2	65	4.40433	84.9211	10.6745	484.54	12.4978	11	0.685371
2	66	5.10627	73.1053	21.7885	502.52	12.9616	2	0.682166
2	67	8.56984	76.1703	15.2598	472.25	12.1808	2	0.491291
2	68	8.25328	72.9161	18.8307	483.49	12.4707	2	0.732364
2	69	8.409	68.6734	22.9176	470.02	12.1233	2	0.7002
2	70	8.57793	68.4534	22.9687	477.36	12.3126	2	0.695062
2	71	5.59304	76.8281	17.5789	508.93	13.1269	2	0.49101
4	1	48.5985	25.6945	25.707	3286.53	84.7698	6	0.496483
4	2	30.2851	27.8321	41.8828	3355.38	86.5457	10	0.7485
4	3	29.6542	29.837	40.5088	3246.06	83.7262	10	0.833643
4	4	43.5817	24.0033	32.4149	3272.93	84.4191	1	0.635453
4	5	62.266	21.5263	16.2078	3307.18	85.3027	7	0.633659
4	6	55.5332	21.8508	22.6159	3298.35	85.0749	5	0.628997
4	7	29.7577	29.9629	40.2795	3231.28	83.345	10	0.835894

## Sheet: HH17e1
ALL CELLS									Non clone cells (silhouette <0.4)									Clone cells (silhouette >0.4)
Cell Type	C1	C2	C3	Y	Clone nb	silhouette_idx7	Axis level		Cell Type	C1	C2	C3	Y	Clone nb	silhouette_idx7	Axis level		Cell Type	C1	C2	C3	Y	Clone nb	silhouette_idx7	Axis level	Assigned Clone type
2	10.1964	69.234	20.5696	4789.75	10	0.131357	96.1587		2	5.72035	60.2361	34.0435	2045.55	6	0.399366	41.067		2	34.0615	48.0226	17.9159	4037.65	1	0.637199	81.061	NM
2	17.6868	64.0923	18.2208	4841.09	3	0.247046	97.1894		2	30.345	25.7761	43.879	4445.36	5	0.394441	89.2464		1	33.3966	48.3395	18.2639	4443.98	1	0.634414	89.2187
2	7.70525	63.6566	28.6382	4830.71	10	0.606543	96.981		2	50.7472	16.3011	32.9517	3378.56	2	0.393091	67.829		2	32.3053	47.3366	20.3581	2189.41	1	0.622133	43.9552
2	4.13773	59.3726	36.4897	4720.69	6	0.166431	94.7721		1	40.6186	10.4717	48.9097	1864.76	5	0.392469	37.4374		2	33.1034	46.0832	20.8134	4340.77	1	0.619321	87.1466
2	33.1034	46.0832	20.8134	4340.77	3	0.619321	87.1451		2	51.6451	13.4484	34.9065	3260.52	2	0.38887	65.4591		2	32.7873	51.3418	15.871	2391.77	1	0.613999	48.0178
2	3.63507	51.1224	45.2425	4226.66	6	0.596676	84.8541		2	0.528758	38.4408	61.0304	3261.16	4	0.385706	65.472		1	37.0827	51.7998	11.1176	3988.52	1	0.5851	80.0748
2	10.8836	74.4168	14.6995	4212.51	1	0.47681	84.5701		2	40.0594	31.0195	28.9211	3125.33	8	0.378497	62.745		1	30.758	53.0393	16.2028	4447.08	1	0.579908	89.2808
2	25.1536	53.1851	21.6613	4109.36	3	0.430993	82.4992		2	24.0679	52.524	23.4081	2191.26	3	0.377932	43.9924		1	34.4615	53.568	11.9705	4126.27	1	0.577445	82.8402
2	34.0615	48.0226	17.9159	4037.65	3	0.637199	81.0595		1	42.8162	45.5776	11.6062	4026.41	7	0.377375	80.8353		1	35.7067	44.8633	19.43	1738.47	1	0.570102	34.902
2	17.6705	66.0944	16.2351	4060.78	10	0.104293	81.524		1	1.7175	69.6216	28.6609	4359.19	10	0.376221	87.5163		1	33.9701	55.1801	10.8499	4494.73	1	0.542988	90.2375
2	22.9324	47.1961	29.8715	4052.4	3	0.300975	81.3556		1	41.6553	8.87439	49.4703	1867.22	5	0.373454	37.4869		1	39.1484	47.3996	13.452	4307.32	1	0.525669	86.4751
2	1.57097	66.5096	31.9194	4058.88	10	0.498088	81.4857		1	32.7184	20.6131	46.6685	3885.89	5	0.372008	78.0143		2	35.8292	43.1643	21.0065	2182.83	1	0.510093	43.8232
2	22.7741	43.4937	33.7322	4017.23	3	0.259452	80.6496		2	51.067	34.5507	14.3823	2214.64	7	0.369349	44.4619		2	38.3411	43.7153	17.9436	2149.6	1	0.505008	43.156
2	6.26514	74.434	19.3009	3880.5	1	0.407372	77.9047		1	29.1123	11.666	59.2217	1863.97	9	0.367122	37.4217		1	28.7918	56.5104	14.6978	3986	1	0.484179	80.0241
2	6.72237	65.7716	27.5061	3862.18	10	0.558999	77.5369		1	27.5243	59.8076	12.668	4040.14	3	0.366893	81.111		1	30.2724	57.3614	12.3661	4491.39	1	0.481361	90.1704
2	18.0615	65.7368	16.2017	3782.25	10	0.116152	75.9322		1	43.1143	29.3103	27.5754	4372.16	8	0.359664	87.7768		1	26.0151	47.9533	26.0316	3003.88	1	0.453528	60.3068
2	3.73323	80.2716	15.9952	3521.87	1	0.721122	70.7047		1	30.9454	40.7004	28.3542	4022.78	8	0.358409	80.7624		2	27.7024	57.0169	15.2808	2315.63	1	0.450995	46.4892
2	2.63419	83.3692	13.9967	3520.73	1	0.744857	70.6819		2	15.8938	56.9219	27.1843	2184.66	10	0.353479	43.86		2	25.1536	53.1851	21.6613	4109.36	1	0.430993	82.5007
2	1.94529	83.2563	14.7984	3532.94	1	0.732822	70.927		1	2.26569	69.9086	27.8257	4107.19	10	0.352711	82.4571		1	28.106	58.3681	13.5259	4144.47	1	0.42296	83.2055
2	47.7443	15.2556	37	3401.07	2	0.552224	68.2796		1	50.2728	32.5508	17.1764	3938.07	7	0.347374	79.0619		1	25.3946	55.9818	18.6236	2986.77	1	0.405229	59.9632
2	49.1948	18.7481	32.0572	3405.11	2	0.42767	68.3608		1	34.0079	39.9559	26.0361	3842.95	8	0.343085	77.1521		1	40.7423	20.0413	39.2164	3851.07	2	0.667866	77.3153	NM
2	42.2033	14.5782	43.2185	3399.8	5	0.617681	68.2542		1	34.9806	16.3302	48.6892	4308.48	5	0.332156	86.4984		1	38.6781	20.9313	40.3906	4514.59	2	0.664869	90.6363
2	1.09821	35.8906	63.0112	3268.64	4	0.249516	65.6211		2	15.0953	37.7068	47.1979	3679.45	4	0.329814	73.8697		2	40.5558	18.8309	40.6133	2993.1	2	0.663844	60.0904
2	54.6268	14.2782	31.095	3318.41	2	0.155107	66.6201		1	52.4093	14.4009	33.1898	4500.92	2	0.327464	90.3618		1	40.4811	18.3409	41.178	4318.13	2	0.660144	86.692
2	54.4046	15.0324	30.563	3310.8	2	0.140527	66.4675		2	51.9722	36.5411	11.4866	2226.93	7	0.318098	44.7085		2	39.0052	23.6809	37.3139	3691.32	2	0.656528	74.108
2	0.528758	38.4408	61.0304	3261.16	4	0.385706	65.4708		1	56.5786	18.952	24.4694	3952.36	2	0.31709	79.3487		1	40.1465	23.461	36.3924	3093.88	2	0.653734	62.1136
2	1.07326	39.7607	59.1661	3246.56	4	0.465746	65.1777		1	24.2046	57.7734	18.022	3994.88	3	0.314701	80.2024		1	38.9411	19.0352	42.0238	4317.94	2	0.650165	86.6881
2	1.05354	45.6733	53.2731	3250.72	4	0.64302	65.2611		1	47.1304	24.9298	27.9398	4372.09	2	0.312336	87.7754		2	41.8178	22.3505	35.8317	3213.58	2	0.646607	64.5168
2	38.5157	16.5917	44.8926	3238.95	5	0.557026	65.0249		1	45.7901	49.5432	4.66666	4147.98	7	0.308947	83.276		1	36.7081	24.4018	38.8901	1891.81	2	0.645792	37.9806
2	43.8238	18.4522	37.724	3237.54	5	0.640421	64.9966		1	22.9873	49.9995	27.0132	1727.76	3	0.308018	34.687		1	38.8949	24.8437	36.2614	3531.94	2	0.643558	70.9083
2	3.93816	50.3682	45.6936	3216.23	6	0.609382	64.5687		1	4.00768	70.0699	25.9224	3781.8	10	0.304921	75.9246		2	43.8238	18.4522	37.724	3237.54	2	0.640421	64.9978
2	1.84323	56.0256	42.1312	3198.75	6	0.4054	64.2178		1	24.4174	58.4923	17.0903	4002.25	3	0.304655	80.3503		1	43.3987	16.8656	39.7357	3914.98	2	0.638966	78.5983
2	1.03135	50.4165	48.5521	3161.09	6	0.649485	63.4618		2	52.1218	37.0778	10.8004	2589.13	7	0.300983	51.9801		1	36.6697	25.2768	38.0536	4385.2	2	0.6334	88.0386
2	5.62304	59.2445	35.1325	3133.57	6	0.298684	62.9094		2	22.9324	47.1961	29.8715	4052.4	3	0.300975	81.3571		1	39.4933	25.2107	35.296	3869.89	2	0.632317	77.6931
2	4.01987	48.575	47.4051	3140.72	6	0.633579	63.0528		2	5.62304	59.2445	35.1325	3133.57	6	0.298684	62.9105		1	37.5004	20.3549	42.1447	1644.54	2	0.628564	33.0163
2	1.96159	78.7527	19.2857	2956.93	1	0.601163	59.363		1	3.40397	70.3086	26.2874	3776.42	10	0.295104	75.8165		1	43.6725	14.8233	41.5042	4309.51	2	0.618129	86.5189
2	1.25415	88.3133	10.4325	3017.57	1	0.644823	60.5806		2	11.7473	54.9363	33.3164	3679.1	6	0.293025	73.8628		2	42.2033	14.5782	43.2185	3399.8	2	0.617681	68.2554
2	2.3389	83.3291	14.332	3035.39	1	0.74076	60.9382		1	53.1248	24.3994	22.4758	3561.51	2	0.290517	71.5019		1	45.283	19.0632	35.6538	3956.31	2	0.608054	79.428
2	7.08363	56.8065	36.1099	2977.59	6	0.15649	59.7779		2	6.02304	69.6139	24.363	2082.15	10	0.290111	41.8019		1	43.794	22.1289	34.0771	4343.7	2	0.606114	87.2054
2	18.708	55.546	25.7461	2983.68	3	0.0972872	59.9002		1	52.689	25.2228	22.0883	3689.64	2	0.288625	74.0742		1	38.5625	17.8196	43.618	4553.41	2	0.600148	91.4155
2	33.4521	37.5626	28.9853	3699.78	8	0.14676	74.2765		2	9.93713	68.0887	21.9742	3558.4	10	0.28169	71.4395		2	45.6741	15.0929	39.233	2225.52	2	0.599407	44.6803
2	32.7929	30.0279	37.1792	3692.52	8	0.420581	74.1308		2	59.418	14.548	26.034	2231.14	2	0.274944	44.7931		1	40.1229	27.0392	32.8379	1887.65	2	0.578446	37.897
2	10.9797	57.4409	31.5794	3685.54	10	0.450456	73.9907		1	22.3895	47.2173	30.3931	4361.31	3	0.269417	87.559		1	42.2989	25.2278	32.4734	3856.49	2	0.573899	77.4241
2	15.0953	37.7068	47.1979	3679.45	4	0.329814	73.8683		2	48.6174	34.7624	16.6203	3431.17	7	0.26362	68.8851		2	47.3385	15.8581	36.8034	3102.28	2	0.56454	62.2823
2	11.7473	54.9363	33.3164	3679.1	6	0.293025	73.8614		2	22.7741	43.4937	33.7322	4017.23	3	0.259452	80.6511		1	34.6301	26.8602	38.5097	2984.87	2	0.55969	59.9251
2	8.46744	17.2944	74.2382	3660.08	9	0.604925	73.4795		1	1.38629	58.007	40.6067	4981.09	6	0.259366	100.002		2	46.6927	19.0895	34.2178	2983.84	2	0.559046	59.9045
2	51.6451	13.4484	34.9065	3260.52	2	0.38887	65.4579		1	45.6396	45.4097	8.95065	4137.62	7	0.258179	83.068		1	44.7675	22.7141	32.5184	1604.15	2	0.558059	32.2054
2	20.6017	55.0393	24.359	2996.75	3	0.0769825	60.1626		1	49.6992	30.3904	19.9105	1674.32	7	0.256291	33.6141		1	46.0073	20.687	33.3057	3095.28	2	0.557094	62.1417
2	72.3361	16.9832	10.6808	2061.36	11	0.583154	41.3837		2	50.6816	37.2099	12.1085	2573.07	7	0.253714	51.6576		2	38.5157	16.5917	44.8926	3238.95	2	0.557026	65.026
2	62.7206	23.414	13.8654	2027.82	11	0.632989	40.7105		2	1.09821	35.8906	63.0112	3268.64	4	0.249516	65.6222		1	46.8615	19.0429	34.0957	1593.97	2	0.552671	32.001
2	14.0267	55.7141	30.2592	2172.4	10	0.410683	43.613		2	17.6868	64.0923	18.2208	4841.09	3	0.247046	97.1912		2	47.7443	15.2556	37	3401.07	2	0.552224	68.2808
2	15.8938	56.9219	27.1843	2184.66	10	0.353479	43.8592		1	0.49858	71.5886	27.9128	4114.01	10	0.241061	82.594		1	36.6181	18.7595	44.6224	4465.27	2	0.544467	89.6462
2	24.0679	52.524	23.4081	2191.26	3	0.377932	43.9916		1	50.7233	27.9066	21.3701	3514.85	7	0.238826	70.5652		1	40.6511	27.9363	31.4126	3875.49	2	0.534419	77.8054
2	20.7958	52.2375	26.9667	2204.79	3	0.1324	44.2632		2	23.9962	60.8041	15.1997	2378.2	3	0.221467	47.7454		2	44.6303	23.6851	31.6846	3200.04	2	0.532954	64.245
2	51.067	34.5507	14.3823	2214.64	7	0.369349	44.4611		1	31.616	38.6239	29.7601	4254.67	8	0.215146	85.4179		2	48.4929	15.1836	36.3235	2208.47	2	0.526349	44.3378
2	46.8828	35.0825	18.0347	2223.41	7	0.155148	44.6371		1	49.1979	30.2203	20.5818	4393.08	7	0.210889	88.1967		2	48.5556	15.3073	36.1371	2216.06	2	0.523342	44.4902
2	50.1965	40.8252	8.97823	2220.51	7	0.0807803	44.5787		2	21.6408	51.6927	26.6665	1885.81	3	0.209712	37.8601		2	40.8018	28.5458	30.6525	4473.32	2	0.506099	89.8077
2	51.9722	36.5411	11.4866	2226.93	7	0.318098	44.7077		2	2.86342	71.2168	25.9198	2146.35	10	0.206909	43.0907		1	35.5744	19.0545	45.371	4349.32	2	0.498569	87.3183
2	35.8292	43.1643	21.0065	2182.83	3	0.510093	43.8224		1	0.793976	58.8599	40.3461	4748.68	6	0.20085	95.336		1	36.9321	16.9411	46.1267	4591.23	2	0.490407	92.1748
2	32.3053	47.3366	20.3581	2189.41	3	0.622133	43.9545		2	50.4664	21.202	28.3316	3740.64	2	0.19859	75.0982		1	32.7359	28.217	39.0471	1897.13	2	0.485572	38.0874
2	38.3411	43.7153	17.9436	2149.6	7	0.505008	43.1553		2	53.8106	21.3068	24.8826	3383.01	2	0.193434	67.9182		2	47.7949	20.159	32.0461	3254.38	2	0.477162	65.3358
2	2.56578	85.4983	11.9359	2187.13	1	0.712777	43.9087		2	48.9591	37.1486	13.8922	1567.1	7	0.192381	31.4615		2	46.5076	22.6128	30.8796	2988.01	2	0.471278	59.9881
2	3.14273	77.1023	19.755	2170.84	1	0.544446	43.5817		1	52.0563	24.4531	23.4906	4358.22	2	0.191492	87.4969		2	33.9316	29.2711	36.7972	4447.07	2	0.469116	89.2807
2	1.80148	84.5698	13.6287	2189.25	1	0.722825	43.9513		1	2.72914	57.6115	39.6594	4944.46	6	0.184746	99.2664		1	48.9669	18.4698	32.5633	3908.16	2	0.451058	78.4614
2	2.86342	71.2168	25.9198	2146.35	10	0.206909	43.0899		1	21.5019	54.578	23.9201	4046.61	3	0.173231	81.2409		1	49.9691	15.8467	34.1842	1617.5	2	0.450948	32.4734
2	5.04877	64.1496	30.8016	2096.86	10	0.582552	42.0963		2	49.0165	37.7556	13.2279	2585.92	7	0.167438	51.9156		2	36.7189	15.8098	47.4713	3165.2	2	0.428085	63.5455
2	6.02304	69.6139	24.363	2082.15	10	0.290111	41.8012		2	4.13773	59.3726	36.4897	4720.69	6	0.166431	94.7738		2	49.1948	18.7481	32.0572	3405.11	2	0.42767	68.362
2	5.72035	60.2361	34.0435	2045.55	6	0.399366	41.0663		1	35.8622	12.3668	51.771	1871.39	5	0.165896	37.5707		1	46.154	24.2604	29.5856	3891.12	2	0.422199	78.1193
2	6.80743	49.1956	43.997	2030.12	6	0.517715	40.7566		1	26.1553	20.8838	52.9609	4761.39	5	0.158587	95.5911		2	32.7929	30.0279	37.1792	3692.52	2	0.420581	74.1321
2	4.48391	83.228	12.2881	1946.4	1	0.743854	39.0759		2	7.08363	56.8065	36.1099	2977.59	6	0.15649	59.779		1	63.628	21.4703	14.9017	2255.62	3	0.638878	45.2845	NM
2	4.00244	82.1828	13.8148	1920.24	1	0.755	38.5506		2	46.8828	35.0825	18.0347	2223.41	7	0.155148	44.6379		1	66.005	19.0043	14.9907	2263	3	0.638845	45.4326
2	5.70592	78.445	15.8491	1892.74	1	0.683031	37.9986		2	54.6268	14.2782	31.095	3318.41	2	0.155107	66.6213		2	67.498	19.2574	13.2446	2768.77	3	0.637308	55.5866
2	21.6408	51.6927	26.6665	1885.81	3	0.209712	37.8594		1	50.2833	22.2863	27.4304	3838.14	2	0.151505	77.0556		2	67.6161	18.2876	14.0963	2862.69	3	0.63551	57.4721
2	6.71464	82.3284	10.9569	1790.03	1	0.708925	35.9366		2	33.4521	37.5626	28.9853	3699.78	8	0.14676	74.2779		2	67.434	18.1896	14.3764	2767.82	3	0.635227	55.5676
2	12.5449	74.6988	12.7563	1798.07	1	0.480211	36.0979		2	54.4046	15.0324	30.563	3310.8	2	0.140527	66.4687		2	64.4	22.5471	13.0529	2767.01	3	0.635038	55.5513
2	6.34482	80.9243	12.7309	1571.01	1	0.727071	31.5394		2	20.7958	52.2375	26.9667	2204.79	3	0.1324	44.264		2	62.7206	23.414	13.8654	2027.82	3	0.632989	40.7112
2	3.63995	76.9571	19.403	1573.55	1	0.555054	31.5905		2	10.1964	69.234	20.5696	4789.75	10	0.131357	96.1604		1	63.6629	20.0949	16.2422	3116.28	3	0.632968	62.5633
2	1.68366	78.1614	20.1549	1582.07	1	0.546189	31.7615		2	30.3024	34.6747	35.0229	3503.78	8	0.123625	70.3429		1	63.3546	20.2264	16.419	2258.18	3	0.631088	45.3359
2	48.9591	37.1486	13.8922	1567.1	7	0.192381	31.4609		1	54.4469	19.0235	26.5296	4168.61	2	0.11731	83.6901		2	68.0455	17.5272	14.4273	2377.33	3	0.62827	47.7279
2	48.4929	15.1836	36.3235	2208.47	2	0.526349	44.337		2	18.0615	65.7368	16.2017	3782.25	10	0.116152	75.9335		2	63.092	20.0159	16.8921	2853.84	3	0.625604	57.2946
2	45.6741	15.0929	39.233	2225.52	5	0.599407	44.6795		1	49.9513	23.3831	26.6657	4402.87	2	0.113811	88.3933		1	66.633	17.3388	16.0283	2236.64	3	0.622841	44.9035
2	48.5556	15.3073	36.1371	2216.06	2	0.523342	44.4894		2	35.7079	34.6018	29.6903	3607.71	8	0.111216	72.4294		1	69.1749	17.2826	13.5425	3111.52	3	0.620868	62.4678
2	59.418	14.548	26.034	2231.14	2	0.274944	44.7923		2	17.6705	66.0944	16.2351	4060.78	10	0.104293	81.5255		2	69.5251	18.3858	12.0892	2739.78	3	0.620307	55.0046
2	58.0005	13.409	28.5906	2232.06	2	0.0965685	44.8107		2	18.708	55.546	25.7461	2983.68	3	0.0972872	59.9013		2	68.2828	16.7817	14.9356	2761.32	3	0.619088	55.4371
2	27.7024	57.0169	15.2808	2315.63	3	0.450995	46.4884		2	58.0005	13.409	28.5906	2232.06	2	0.0965685	44.8115		2	69.2373	17.0487	13.714	2765.93	3	0.618806	55.5296
2	72.1624	16.157	11.6806	2360.48	11	0.58292	47.3889		1	3.8151	59.1018	37.0831	4370.05	6	0.0900096	87.7344		1	61.4612	21.046	17.4928	4311.64	3	0.610484	86.5617
2	61.0192	20.9861	17.9948	2358.26	11	0.600625	47.3442		1	49.0895	28.0754	22.8351	3646.81	7	0.0881812	73.2145		2	70.5082	18.3912	11.1006	2784.88	3	0.608638	55.9101
2	68.0455	17.5272	14.4273	2377.33	11	0.62827	47.7271		1	53.7986	16.978	29.2234	1726.45	2	0.0843285	34.6608		1	60.3075	23.1298	16.5627	3659.93	3	0.608244	73.4778
2	23.9962	60.8041	15.1997	2378.2	3	0.221467	47.7446		2	50.1965	40.8252	8.97823	2220.51	7	0.0807803	44.5795		2	67.2805	16.1737	16.5458	2396.82	3	0.605998	48.1193
2	67.2805	16.1737	16.5458	2396.82	11	0.605998	48.1184		2	20.6017	55.0393	24.359	2996.75	3	0.0769825	60.1636		1	61.1673	20.9597	17.873	3658.68	3	0.603479	73.4526
2	32.7873	51.3418	15.871	2391.77	3	0.613999	48.0169		1	30.0972	37.2767	32.6261	2992.07	8	0.0723835	60.0697		1	70.1201	15.8892	13.9906	3112.55	3	0.602192	62.4886
2	70.5962	13.5029	15.9009	2401.51	11	0.568532	48.2125		1	53.3336	20.2731	26.3932	4351.08	2	0.0716444	87.3535		2	61.0192	20.9861	17.9948	2358.26	3	0.600625	47.3451
2	50.6816	37.2099	12.1085	2573.07	7	0.253714	51.6567		1	57.9863	12.7375	29.2762	4303.8	2	0.0557188	86.4043		2	71.1135	19.4702	9.41624	2757.78	3	0.594362	55.3661
2	49.0165	37.7556	13.2279	2585.92	7	0.167438	51.9147		1	0.769827	61.3429	37.8873	4968.93	6	0.0519825	99.7578		2	70.824	15.4346	13.7414	3397.59	3	0.592915	68.211
2	54.6923	32.4208	12.8869	2577.11	7	0.496271	51.7379		1	28.8854	18.6958	52.4188	4760.5	5	0.0440475	95.5731		2	71.8954	18.2793	9.82529	2760.68	3	0.589055	55.4243
2	52.1218	37.0778	10.8004	2589.13	7	0.300983	51.9792		1	52.0873	20.6647	27.248	1728.52	2	0.0386196	34.7022		2	72.3361	16.9832	10.6808	2061.36	3	0.583154	41.3845
2	73.4004	16.8196	9.78004	2665.98	11	0.56694	53.5221		1	8.97312	31.5595	59.4674	4756.32	4	0.0368135	95.4892		2	72.1624	16.157	11.6806	2360.48	3	0.58292	47.3897
2	68.2828	16.7817	14.9356	2761.32	11	0.619088	55.4361		1	22.1825	66.4543	11.3632	4118.55	3	-0.0161944	82.6852		2	70.5962	13.5029	15.9009	2401.51	3	0.568532	48.2133
2	69.2373	17.0487	13.714	2765.93	11	0.618806	55.5286		1	3.61059	58.4098	37.9796	4603.53	6	-0.0319602	92.4218		2	73.4004	16.8196	9.78004	2665.98	3	0.56694	53.523
2	67.434	18.1896	14.3764	2767.82	11	0.635227	55.5666		1	44.5483	35.2982	20.1535	3919.31	7	-0.0353139	78.6852		2	73.7711	18.0854	8.14351	2766.55	3	0.559383	55.542
2	63.092	20.0159	16.8921	2853.84	11	0.625604	57.2936		1	44.9159	33.853	21.231	3582.41	7	-0.0390531	71.9215		2	60.8544	18.9502	20.1954	3931.76	3	0.555725	78.9351
2	58.1979	23.3686	18.4335	2843.57	11	0.553324	57.0873		1	4.00546	72.4897	23.5049	3812.95	10	-0.0541649	76.55		1	74.1619	17.8441	7.99398	2257.04	3	0.553539	45.3131
2	67.6832	13.6185	18.6982	2869	11	0.550497	57.5978		1	14.9672	68.8408	16.192	1741.07	10	-0.0567457	34.9542		2	58.1979	23.3686	18.4335	2843.57	3	0.553324	57.0884
2	60.0408	18.5922	21.3669	2853.63	11	0.512307	57.2893		1	44.9996	35.1291	19.8713	3930.62	7	-0.0699048	78.9122		2	67.6832	13.6185	18.6982	2869	3	0.550497	57.5988
2	69.5251	18.3858	12.0892	2739.78	11	0.620307	55.0036											1	62.2483	17.3193	20.4323	4416.44	3	0.549029	88.6658
2	71.1135	19.4702	9.41624	2757.78	11	0.594362	55.3651											1	60.5963	18.9802	20.4235	4408.11	3	0.54788	88.4984
2	67.498	19.2574	13.2446	2768.77	11	0.637308	55.5857											2	60.6677	18.8844	20.448	2867.11	3	0.547664	57.561
2	71.8954	18.2793	9.82529	2760.68	11	0.589055	55.4233											1	57.0468	23.9532	19	3650.59	3	0.519696	73.2904
2	73.7711	18.0854	8.14351	2766.55	11	0.559383	55.541											2	55.5985	27.9151	16.4864	3120.35	3	0.517532	62.645
2	64.4	22.5471	13.0529	2767.01	11	0.635038	55.5503											1	57.1356	23.6117	19.2527	3945.51	3	0.516842	79.2111
2	70.5082	18.3912	11.1006	2784.88	11	0.608638	55.9091											2	60.0408	18.5922	21.3669	2853.63	3	0.512307	57.2903
2	55.3034	24.1005	20.5961	2865.19	2	0.437812	57.5214											2	54.6923	32.4208	12.8869	2577.11	3	0.496271	51.7388
2	67.6161	18.2876	14.0963	2862.69	11	0.63551	57.4711											1	54.3564	30.5224	15.1212	3668.52	3	0.494298	73.6503
2	60.6677	18.8844	20.448	2867.11	11	0.547664	57.5599											1	59.6249	18.5451	21.83	2241.57	3	0.491204	45.0024
2	46.5076	22.6128	30.8796	2988.01	2	0.471278	59.9871											1	53.8605	31.0975	15.042	4353.95	3	0.481314	87.4113
2	46.6927	19.0895	34.2178	2983.84	2	0.559046	59.9034											2	55.3034	24.1005	20.5961	2865.19	3	0.437812	57.5225
2	40.5558	18.8309	40.6133	2993.1	5	0.663844	60.0893											1	54.8014	24.7812	20.4174	3743.45	3	0.427258	75.1546
2	55.5985	27.9151	16.4864	3120.35	7	0.517532	62.6439											2	10.329	60.801	28.87	3528.56	4	0.607497	70.8403	NM
2	40.0594	31.0195	28.9211	3125.33	8	0.378497	62.7439											2	7.70525	63.6566	28.6382	4830.71	4	0.606543	96.9827
2	47.3385	15.8581	36.8034	3102.28	2	0.56454	62.2811											1	8.02295	63.9617	28.0154	4550.76	4	0.600402	91.3624
2	36.7189	15.8098	47.4713	3165.2	5	0.428085	63.5444											2	5.04877	64.1496	30.8016	2096.86	4	0.582552	42.0971
2	41.8178	22.3505	35.8317	3213.58	8	0.646607	64.5157											1	7.9041	65.2282	26.8677	4563.41	4	0.564937	91.6164
2	44.6303	23.6851	31.6846	3200.04	8	0.532954	64.2439											2	6.72237	65.7716	27.5061	3862.18	4	0.558999	77.5383
2	47.7949	20.159	32.0461	3254.38	2	0.477162	65.3346											1	6.54224	66.0062	27.4516	3793.23	4	0.550768	76.154
2	70.824	15.4346	13.7414	3397.59	11	0.592915	68.2098											1	13.0397	59.6576	27.3027	4569.73	4	0.547189	91.7433
2	50.7472	16.3011	32.9517	3378.56	2	0.393091	67.8278											2	1.57097	66.5096	31.9194	4058.88	4	0.498088	81.4872
2	53.8106	21.3068	24.8826	3383.01	2	0.193434	67.917											1	14.225	60.4391	25.3359	4247.72	4	0.496611	85.2784
2	48.6174	34.7624	16.6203	3431.17	7	0.26362	68.8839											1	7.49903	60.1462	32.3548	4546.96	4	0.49584	91.2861
2	10.329	60.801	28.87	3528.56	10	0.607497	70.839											2	10.9797	57.4409	31.5794	3685.54	4	0.450456	73.992
2	9.93713	68.0887	21.9742	3558.4	10	0.28169	71.4382											1	1.48387	65.2885	33.2276	4588.86	4	0.446472	92.1273
2	35.7079	34.6018	29.6903	3607.71	8	0.111216	72.4281											2	14.0267	55.7141	30.2592	2172.4	4	0.410683	43.6138
2	30.3024	34.6747	35.0229	3503.78	8	0.123625	70.3416											2	1.03135	50.4165	48.5521	3161.09	5	0.649485	63.4629	NM
2	50.4664	21.202	28.3316	3740.64	2	0.19859	75.0969											2	1.05354	45.6733	53.2731	3250.72	5	0.64302	65.2623
2	39.0052	23.6809	37.3139	3691.32	8	0.656528	74.1067											1	1.44673	45.0572	53.4961	4708.67	5	0.640177	94.5325
2	60.8544	18.9502	20.1954	3931.76	11	0.555725	78.9337											2	4.01987	48.575	47.4051	3140.72	5	0.633579	63.0539
2	9.79887	74.4934	15.7078	4104.88	1	0.475223	82.4093											1	1.18503	52.4172	46.3977	4651.46	5	0.615168	93.3841
2	33.9316	29.2711	36.7972	4447.07	8	0.469116	89.2792											2	3.93816	50.3682	45.6936	3216.23	5	0.609382	64.5699
2	40.8018	28.5458	30.6525	4473.32	8	0.506099	89.8061											1	5.17735	48.5728	46.2498	3087.54	5	0.602085	61.9863
2	30.345	25.7761	43.879	4445.36	5	0.394441	89.2448											2	3.63507	51.1224	45.2425	4226.66	5	0.596676	84.8556
1	1.44673	45.0572	53.4961	4708.67	4	0.640177	94.5309											2	6.80743	49.1956	43.997	2030.12	5	0.517715	40.7573
1	1.90858	54.487	43.6045	4693.58	6	0.506917	94.228											1	1.90858	54.487	43.6045	4693.58	5	0.506917	94.2297
1	1.18503	52.4172	46.3977	4651.46	6	0.615168	93.3825											2	1.07326	39.7607	59.1661	3246.56	5	0.465746	65.1789
1	1.48387	65.2885	33.2276	4588.86	10	0.446472	92.1256											2	1.84323	56.0256	42.1312	3198.75	5	0.4054	64.219
1	3.61059	58.4098	37.9796	4603.53	6	-0.0319602	92.4202											2	4.00244	82.1828	13.8148	1920.24	6	0.755	38.5513	NM
1	13.0397	59.6576	27.3027	4569.73	10	0.547189	91.7416											1	4.21807	82.251	13.5309	3982.1	6	0.75448	79.9458
1	7.9041	65.2282	26.8677	4563.41	10	0.564937	91.6148											2	2.63419	83.3692	13.9967	3520.73	6	0.744857	70.6832
1	7.49903	60.1462	32.3548	4546.96	10	0.49584	91.2845											2	4.48391	83.228	12.2881	1946.4	6	0.743854	39.0766
1	8.02295	63.9617	28.0154	4550.76	10	0.600402	91.3607											2	2.3389	83.3291	14.332	3035.39	6	0.74076	60.9393
1	33.9701	55.1801	10.8499	4494.73	3	0.542988	90.2359											1	2.49648	82.1872	15.3163	4242.77	6	0.737173	85.179
1	30.2724	57.3614	12.3661	4491.39	3	0.481361	90.1688											2	1.94529	83.2563	14.7984	3532.94	6	0.732822	70.9282
1	0.793976	58.8599	40.3461	4748.68	6	0.20085	95.3343											2	6.34482	80.9243	12.7309	1571.01	6	0.727071	31.54
1	33.3966	48.3395	18.2639	4443.98	3	0.634414	89.2171											2	1.80148	84.5698	13.6287	2189.25	6	0.722825	43.9521
1	30.758	53.0393	16.2028	4447.08	3	0.579908	89.2792											2	3.73323	80.2716	15.9952	3521.87	6	0.721122	70.706
1	3.8151	59.1018	37.0831	4370.05	6	0.0900096	87.7328											2	2.56578	85.4983	11.9359	2187.13	6	0.712777	43.9094
1	22.3895	47.2173	30.3931	4361.31	3	0.269417	87.5574											2	6.71464	82.3284	10.9569	1790.03	6	0.708925	35.9372
1	49.1979	30.2203	20.5818	4393.08	7	0.210889	88.1951											1	4.62947	79.1147	16.2558	4231.52	6	0.696989	84.9533
1	34.9806	16.3302	48.6892	4308.48	5	0.332156	86.4968											2	5.70592	78.445	15.8491	1892.74	6	0.683031	37.9992
1	35.5744	19.0545	45.371	4349.32	5	0.498569	87.3167											1	5.83752	85.7284	8.4341	3950.2	6	0.658878	79.3055
1	1.7175	69.6216	28.6609	4359.19	10	0.376221	87.5148											2	1.25415	88.3133	10.4325	3017.57	6	0.644823	60.5817
1	4.62947	79.1147	16.2558	4231.52	1	0.696989	84.9517											2	1.96159	78.7527	19.2857	2956.93	6	0.601163	59.3641
1	2.49648	82.1872	15.3163	4242.77	1	0.737173	85.1775											2	3.63995	76.9571	19.403	1573.55	6	0.555054	31.5911
1	14.225	60.4391	25.3359	4247.72	10	0.496611	85.2769											2	1.68366	78.1614	20.1549	1582.07	6	0.546189	31.7621
1	28.106	58.3681	13.5259	4144.47	3	0.42296	83.204											2	3.14273	77.1023	19.755	2170.84	6	0.544446	43.5824
1	45.6396	45.4097	8.95065	4137.62	7	0.258179	83.0666											1	13.6028	79.9172	6.48001	3942.53	6	0.533514	79.1513
1	45.7901	49.5432	4.66666	4147.98	7	0.308947	83.2745											1	4.04172	76.4742	19.484	3806.52	6	0.5314	76.4207
1	34.4615	53.568	11.9705	4126.27	3	0.577445	82.8387											2	12.5449	74.6988	12.7563	1798.07	6	0.480211	36.0986
1	22.1825	66.4543	11.3632	4118.55	3	-0.0161944	82.6838											2	10.8836	74.4168	14.6995	4212.51	6	0.47681	84.5716
1	0.49858	71.5886	27.9128	4114.01	10	0.241061	82.5925											2	9.79887	74.4934	15.7078	4104.88	6	0.475223	82.4108
1	2.26569	69.9086	27.8257	4107.19	10	0.352711	82.4557											1	13.1466	74.4694	12.384	3950.41	6	0.460253	79.3096
1	27.5243	59.8076	12.668	4040.14	3	0.366893	81.1096											2	6.26514	74.434	19.3009	3880.5	6	0.407372	77.9061
1	21.5019	54.578	23.9201	4046.61	3	0.173231	81.2395											1	14.7454	11.5873	73.6673	1694.01	7	0.683665	34.0095	NM
1	42.8162	45.5776	11.6062	4026.41	7	0.377375	80.8338											1	13.6727	11.8089	74.5183	1687.5	7	0.678755	33.8788
1	4.21807	82.251	13.5309	3982.1	1	0.75448	79.9444											1	16.5891	15.977	67.4339	4756.32	7	0.678169	95.4893
1	28.7918	56.5104	14.6978	3986	3	0.484179	80.0227											1	13.2916	17.8608	68.8476	4745.9	7	0.668933	95.28
1	37.0827	51.7998	11.1176	3988.52	3	0.5851	80.0733											1	17.0103	20.6143	62.3754	4682.29	7	0.612119	94.0031
1	24.2046	57.7734	18.022	3994.88	3	0.314701	80.201											2	8.46744	17.2944	74.2382	3660.08	7	0.604925	73.4808
1	24.4174	58.4923	17.0903	4002.25	3	0.304655	80.3489											1	23.113	14.4049	62.482	1699.29	7	0.565118	34.1154
1	5.83752	85.7284	8.4341	3950.2	1	0.658878	79.304											1	8.43794	7.03687	84.5252	4741.22	7	0.526028	95.1861
1	13.1466	74.4694	12.384	3950.41	1	0.460253	79.3082
1	13.6028	79.9172	6.48001	3942.53	1	0.533514	79.1499
1	70.1201	15.8892	13.9906	3112.55	11	0.602192	62.4874
1	63.6629	20.0949	16.2422	3116.28	11	0.632968	62.5622
1	69.1749	17.2826	13.5425	3111.52	11	0.620868	62.4667
1	25.3946	55.9818	18.6236	2986.77	3	0.405229	59.9622
1	26.0151	47.9533	26.0316	3003.88	3	0.453528	60.3057
1	5.17735	48.5728	46.2498	3087.54	6	0.602085	61.9852
1	30.0972	37.2767	32.6261	2992.07	8	0.0723835	60.0687
1	74.1619	17.8441	7.99398	2257.04	11	0.553539	45.3123
1	66.005	19.0043	14.9907	2263	11	0.638845	45.4318
1	63.628	21.4703	14.9017	2255.62	11	0.638878	45.2837
1	14.9672	68.8408	16.192	1741.07	10	-0.0567457	34.9536
1	35.7067	44.8633	19.43	1738.47	3	0.570102	34.9014
1	22.9873	49.9995	27.0132	1727.76	3	0.308018	34.6864
1	13.2916	17.8608	68.8476	4745.9	9	0.668933	95.2783
1	8.97312	31.5595	59.4674	4756.32	4	0.0368135	95.4875
1	8.43794	7.03687	84.5252	4741.22	9	0.526028	95.1844
1	16.5891	15.977	67.4339	4756.32	9	0.678169	95.4876
1	17.0103	20.6143	62.3754	4682.29	9	0.612119	94.0014
1	36.9321	16.9411	46.1267	4591.23	5	0.490407	92.1732
1	38.5625	17.8196	43.618	4553.41	5	0.600148	91.4139
1	38.6781	20.9313	40.3906	4514.59	5	0.664869	90.6347
1	36.6181	18.7595	44.6224	4465.27	5	0.544467	89.6446
1	52.4093	14.4009	33.1898	4500.92	2	0.327464	90.3602
1	62.2483	17.3193	20.4323	4416.44	11	0.549029	88.6642
1	60.5963	18.9802	20.4235	4408.11	11	0.54788	88.4969
1	49.9513	23.3831	26.6657	4402.87	2	0.113811	88.3917
1	53.3336	20.2731	26.3932	4351.08	2	0.0716444	87.3519
1	52.0563	24.4531	23.4906	4358.22	2	0.191492	87.4953
1	39.1484	47.3996	13.452	4307.32	7	0.525669	86.4736
1	57.9863	12.7375	29.2762	4303.8	2	0.0557188	86.4028
1	61.4612	21.046	17.4928	4311.64	11	0.610484	86.5601
1	43.794	22.1289	34.0771	4343.7	8	0.606114	87.2038
1	38.9411	19.0352	42.0238	4317.94	5	0.650165	86.6866
1	40.4811	18.3409	41.178	4318.13	5	0.660144	86.6904
1	43.6725	14.8233	41.5042	4309.51	5	0.618129	86.5174
1	53.8605	31.0975	15.042	4353.95	7	0.481314	87.4097
1	47.1304	24.9298	27.9398	4372.09	2	0.312336	87.7739
1	43.1143	29.3103	27.5754	4372.16	8	0.359664	87.7752
1	36.6697	25.2768	38.0536	4385.2	8	0.6334	88.0371
1	31.616	38.6239	29.7601	4254.67	8	0.215146	85.4164
1	54.4469	19.0235	26.5296	4168.61	2	0.11731	83.6886
1	30.9454	40.7004	28.3542	4022.78	8	0.358409	80.761
1	43.3987	16.8656	39.7357	3914.98	5	0.638966	78.5968
1	57.1356	23.6117	19.2527	3945.51	11	0.516842	79.2097
1	45.283	19.0632	35.6538	3956.31	2	0.608054	79.4266
1	56.5786	18.952	24.4694	3952.36	2	0.31709	79.3473
1	44.9996	35.1291	19.8713	3930.62	7	-0.0699048	78.9108
1	50.2728	32.5508	17.1764	3938.07	7	0.347374	79.0605
1	44.5483	35.2982	20.1535	3919.31	7	-0.0353139	78.6838
1	48.9669	18.4698	32.5633	3908.16	2	0.451058	78.46
1	46.154	24.2604	29.5856	3891.12	2	0.422199	78.1179
1	32.7184	20.6131	46.6685	3885.89	5	0.372008	78.0129
1	34.0079	39.9559	26.0361	3842.95	8	0.343085	77.1508
1	39.4933	25.2107	35.296	3869.89	8	0.632317	77.6917
1	40.7423	20.0413	39.2164	3851.07	5	0.667866	77.3139
1	42.2989	25.2278	32.4734	3856.49	8	0.573899	77.4227
1	50.2833	22.2863	27.4304	3838.14	2	0.151505	77.0542
1	40.6511	27.9363	31.4126	3875.49	8	0.534419	77.804
1	54.8014	24.7812	20.4174	3743.45	2	0.427258	75.1533
1	54.3564	30.5224	15.1212	3668.52	7	0.494298	73.6489
1	60.3075	23.1298	16.5627	3659.93	11	0.608244	73.4765
1	57.0468	23.9532	19	3650.59	11	0.519696	73.2891
1	49.0895	28.0754	22.8351	3646.81	7	0.0881812	73.2132
1	61.1673	20.9597	17.873	3658.68	11	0.603479	73.4513
1	52.689	25.2228	22.0883	3689.64	2	0.288625	74.0729
1	38.8949	24.8437	36.2614	3531.94	8	0.643558	70.9071
1	53.1248	24.3994	22.4758	3561.51	2	0.290517	71.5006
1	44.9159	33.853	21.231	3582.41	7	-0.0390531	71.9203
1	50.7233	27.9066	21.3701	3514.85	7	0.238826	70.5639
1	46.0073	20.687	33.3057	3095.28	2	0.557094	62.1406
1	34.6301	26.8602	38.5097	2984.87	8	0.55969	59.924
1	63.3546	20.2264	16.419	2258.18	11	0.631088	45.335
1	66.633	17.3388	16.0283	2236.64	11	0.622841	44.9027
1	59.6249	18.5451	21.83	2241.57	11	0.491204	45.0016
1	40.1229	27.0392	32.8379	1887.65	8	0.578446	37.8964
1	32.7359	28.217	39.0471	1897.13	8	0.485572	38.0868
1	29.1123	11.666	59.2217	1863.97	9	0.367122	37.421
1	35.8622	12.3668	51.771	1871.39	5	0.165896	37.57
1	36.7081	24.4018	38.8901	1891.81	8	0.645792	37.9799
1	41.6553	8.87439	49.4703	1867.22	5	0.373454	37.4862
1	40.6186	10.4717	48.9097	1864.76	5	0.392469	37.4367
1	49.6992	30.3904	19.9105	1674.32	7	0.256291	33.6135
1	46.8615	19.0429	34.0957	1593.97	2	0.552671	32.0005
1	44.7675	22.7141	32.5184	1604.15	8	0.558059	32.2048
1	49.9691	15.8467	34.1842	1617.5	2	0.450948	32.4728
1	13.6727	11.8089	74.5183	1687.5	9	0.678755	33.8782
1	14.7454	11.5873	73.6673	1694.01	9	0.683665	34.0089
1	52.0873	20.6647	27.248	1728.52	2	0.0386196	34.7015
1	53.7986	16.978	29.2234	1726.45	2	0.0843285	34.6602
1	23.113	14.4049	62.482	1699.29	9	0.565118	34.1148
1	37.5004	20.3549	42.1447	1644.54	5	0.628564	33.0157
1	2.72914	57.6115	39.6594	4944.46	6	0.184746	99.2646
1	0.769827	61.3429	37.8873	4968.93	6	0.0519825	99.756
1	1.38629	58.007	40.6067	4981.09	6	0.259366	100
1	26.1553	20.8838	52.9609	4761.39	5	0.158587	95.5894
1	28.8854	18.6958	52.4188	4760.5	5	0.0440475	95.5714
1	3.40397	70.3086	26.2874	3776.42	10	0.295104	75.8151
1	4.00768	70.0699	25.9224	3781.8	10	0.304921	75.9233
1	4.00546	72.4897	23.5049	3812.95	10	-0.0541649	76.5486
1	4.04172	76.4742	19.484	3806.52	1	0.5314	76.4194
1	6.54224	66.0062	27.4516	3793.23	10	0.550768	76.1526
1	40.1465	23.461	36.3924	3093.88	8	0.653734	62.1124

## Sheet: HH17e2
ALL CELLS									Non clone cells (silhouette <0.4)									Clone cells (silhouette >0.4)
Cell Type	C1	C2	C3	Y	Clone nb	silhouette_idx5			Cell Type	C1	C2	C3	Y	Clone nb	silhouette_idx5	Axis level		Cell Type	C1	C2	C3	Y	Clone nb	silhouette_idx5	Axis level	Assigned Clone type
1	90.8586	5.25725	3.88412	940.268	1	0.709871			2	83.1539	6.56938	10.2767	426.328	1	0.390885	9.8916		1	89.9093	6.41605	3.67462	3922.01	1	0.71313	90.998	NM
1	84.6102	6.68141	8.70836	1249.72	1	0.526364			2	82.2832	7.90321	9.81357	2566.47	1	0.355128	59.5468		1	89.5572	7.8534	2.58944	3953.85	1	0.710301	91.7368
1	95.6043	2.4495	1.94619	2124.95	1	0.660465			2	70.9318	18.0762	10.992	4061.96	4	0.298837	94.2449		1	90.8586	5.25725	3.88412	940.268	1	0.709871	21.816
1	95.533	1.8577	2.60925	2133.53	1	0.659356			2	77.8108	7.16179	15.0274	2330.3	4	0.275705	54.0673		2	90.5705	7.2773	2.15225	4300.68	1	0.707054	99.7837
1	93.1004	4.41403	2.48559	2920.27	1	0.699188			2	17.8619	72.9711	9.167	3121.36	5	0.256731	72.4213		2	89.9531	5.64554	4.40141	4257.2	1	0.70635	98.775
1	86.3213	10.5082	3.17058	3541.32	1	0.675889			2	84.4413	1.43927	14.1194	2360.05	1	0.251301	54.7574		1	88.3882	8.52628	3.08551	3861.59	1	0.70578	89.596
1	93.3894	3.29233	3.31826	3744.91	1	0.690749			2	80.9632	8.94619	10.0906	2561.93	1	0.247381	59.4415		1	88.5084	8.8973	2.59428	3861.19	1	0.704118	89.5868
1	88.5084	8.8973	2.59428	3861.19	1	0.704118			1	77.9186	16.2443	5.83712	4005.5	1	0.244299	92.9351		2	87.79	8.83336	3.37665	2333.57	1	0.699866	54.1431
1	88.3882	8.52628	3.08551	3861.59	1	0.70578			2	76.3042	20.721	2.97484	3903.71	1	0.220415	90.5732		1	93.1004	4.41403	2.48559	2920.27	1	0.699188	67.7557
1	86.1393	9.65976	4.20091	3886.69	1	0.669912			1	15.5297	72.7085	11.7618	3889.63	5	0.188209	90.2466		1	92.5287	3.60805	3.86327	3918.86	1	0.694969	90.9249
1	86.3018	10.2426	3.45563	3893.87	1	0.676517			2	76.5481	18.3691	5.08283	4053.8	1	0.186307	94.0558		1	93.3894	3.29233	3.31826	3744.91	1	0.690749	86.889
1	89.9093	6.41605	3.67462	3922.01	1	0.71313			1	76.971	16.8953	6.13375	4022.11	1	0.174843	93.3205		2	93.5226	4.68256	1.7948	2343.79	1	0.690455	54.3804
1	92.5287	3.60805	3.86327	3918.86	1	0.694969			2	39.9648	50.9379	9.09728	3146.9	5	0.119673	73.0139		2	87.0621	9.50598	3.43191	2354.02	1	0.689362	54.6177
1	89.5572	7.8534	2.58944	3953.85	1	0.710301			2	81.1037	5.39444	13.5019	2513.96	1	0.0646616	58.3286		2	94.2992	2.96794	2.73283	2358.98	1	0.6816	54.7327
1	77.9186	16.2443	5.83712	4005.5	1	0.244299			2	80.5384	16.7338	2.72785	858.835	3	0.442099	19.9266		1	86.3018	10.2426	3.45563	3893.87	1	0.676517	90.3449
1	84.6331	13.0184	2.3485	4055.42	1	0.615602			2	77.061	3.0327	19.9063	446.434	1	0.429916	10.3581		1	86.3213	10.5082	3.17058	3541.32	1	0.675889	82.1651
1	76.971	16.8953	6.13375	4022.11	1	0.174843			2	65.434	28.2669	6.29915	3887.45	4	0.400816	90.1961		2	92.3876	2.5577	5.05466	1053.56	1	0.673248	24.4445
1	22.5793	66.5036	10.9171	955.763	5	0.567478			2	83.1539	6.56938	10.2767	426.328	3	0.390885	9.8916		2	94.8732	2.42272	2.70404	1206.31	1	0.672401	27.9886
1	31.5349	62.0083	6.45684	1643.57	5	0.626341			2	82.2832	7.90321	9.81357	2566.47	3	0.355128	59.5468		1	86.1393	9.65976	4.20091	3886.69	1	0.669912	90.1783
1	7.90645	90.3499	1.74364	3273.32	2	0.866484			2	32.7024	63.47	3.82767	4293.48	5	0.309891	99.6168		2	86.0954	11.2378	2.66673	2347.16	1	0.665642	54.4584
1	8.79367	86.1339	5.07245	3267.71	2	0.802578			1	31.5349	62.0083	6.45684	1643.57	5	0.308074	38.1339		2	95.1425	3.55757	1.29993	1227.29	1	0.665071	28.4753
1	7.48229	89.2965	3.22118	3280.83	2	0.883261			2	70.9318	18.0762	10.992	4061.96	1	0.298837	94.2449		1	95.6043	2.4495	1.94619	2124.95	1	0.660465	49.3028
1	4.08717	93.3913	2.52152	4043.67	2	0.823409			2	77.8108	7.16179	15.0274	2330.3	1	0.275705	54.0673		2	95.5716	2.13273	2.29568	4286.23	1	0.66042	99.4485
1	5.88296	87.8509	6.26616	3987.15	2	0.834306			2	39.9648	50.9379	9.09728	3146.9	4	0.265622	73.0139		1	95.533	1.8577	2.60925	2133.53	1	0.659356	49.5017
1	17.5884	66.4735	15.9381	3901.51	5	0.446859			2	84.4413	1.43927	14.1194	2360.05	3	0.251301	54.7574		2	88.595	4.62331	6.78171	1344.77	1	0.658223	31.2013
1	15.5297	72.7085	11.7618	3889.63	5	0.188209			2	80.9632	8.94619	10.0906	2561.93	3	0.247381	59.4415		2	86.8828	6.71771	6.39945	1011.28	1	0.651616	23.4635
2	83.1539	6.56938	10.2767	426.328	1	0.390885			1	77.9186	16.2443	5.83712	4005.5	3	0.244299	92.9351		2	90.8667	2.39933	6.73396	433.465	1	0.646357	10.0572
2	70.8595	9.12354	20.017	441.613	4	0.713083			2	76.3042	20.721	2.97484	3903.71	3	0.220415	90.5732		2	86.2596	12.3565	1.38393	3560.13	1	0.641832	82.6016
2	85.6504	5.35315	8.99642	420.85	1	0.552361			2	76.5481	18.3691	5.08283	4053.8	3	0.186307	94.0558		2	84.9617	10.3353	4.70301	1184.56	1	0.632943	27.484
2	90.8667	2.39933	6.73396	433.465	1	0.646357			1	76.971	16.8953	6.13375	4022.11	3	0.174843	93.3205		2	85.3169	8.76871	5.91438	849.162	1	0.625492	19.7021
2	69.3999	11.6723	18.9279	468.864	4	0.678171			2	81.1037	5.39444	13.5019	2513.96	3	0.0646616	58.3286		2	97.5152	1.38216	1.1026	2364.62	1	0.617724	54.8637
2	69.4801	9.08714	21.4327	460.145	4	0.71874			2	36.913	57.4832	5.6038	2535.63	5	-0.0583181	58.8313		1	84.6331	13.0184	2.3485	4055.42	1	0.615602	94.0933
2	77.061	3.0327	19.9063	446.434	4	0.429916												2	84.2207	13.7605	2.01879	860.374	1	0.59343	19.9623
2	63.5576	9.52503	26.9173	459.913	4	0.632821												2	83.8263	11.6466	4.52712	4281.03	1	0.590967	99.3279
2	85.3169	8.76871	5.91438	849.162	1	0.625492												2	88.7639	2.33525	8.90084	2491.6	1	0.584827	57.8097
2	80.5384	16.7338	2.72785	858.835	1	0.442099												2	86.3205	4.41987	9.25961	4263.04	1	0.558109	98.9104
2	84.2207	13.7605	2.01879	860.374	1	0.59343												2	85.6504	5.35315	8.99642	420.85	1	0.552361	9.7645
2	86.8828	6.71771	6.39945	1011.28	1	0.651616												2	83.0828	15.038	1.8792	3400.26	1	0.545689	78.8923
2	92.3876	2.5577	5.05466	1053.56	1	0.673248												1	84.6102	6.68141	8.70836	1249.72	1	0.526364	28.9959
2	84.9617	10.3353	4.70301	1184.56	1	0.632943												2	80.5384	16.7338	2.72785	858.835	1	0.442099	19.9266
2	94.8732	2.42272	2.70404	1206.31	1	0.672401												1	7.48229	89.2965	3.22118	3280.83	2	0.883261	76.1214	N
2	95.1425	3.55757	1.29993	1227.29	1	0.665071												1	7.90645	90.3499	1.74364	3273.32	2	0.866484	75.9472
2	87.79	8.83336	3.37665	2333.57	1	0.699866												1	5.88296	87.8509	6.26616	3987.15	2	0.834306	92.5093
2	86.0954	11.2378	2.66673	2347.16	1	0.665642												1	4.08717	93.3913	2.52152	4043.67	2	0.823409	93.8206
2	93.5226	4.68256	1.7948	2343.79	1	0.690455												1	8.79367	86.1339	5.07245	3267.71	2	0.802578	75.8169
2	87.0621	9.50598	3.43191	2354.02	1	0.689362												2	57.1371	36.2685	6.59438	3193.84	3	0.757689	74.1031	M
2	77.8108	7.16179	15.0274	2330.3	4	0.275705												2	60.7861	36.2173	2.99664	1369.74	3	0.753889	31.7804
2	71.5773	7.4137	21.009	2344.59	4	0.698335												2	53.5953	38.343	8.06165	2437.37	3	0.716406	56.5515
2	84.4413	1.43927	14.1194	2360.05	1	0.251301												2	54.4229	43.4409	2.1362	4310.33	3	0.664203	100.008
2	53.5953	38.343	8.06165	2437.37	3	0.716406												2	64.2148	31.8632	3.92206	2540.76	3	0.659193	58.9504
2	88.7639	2.33525	8.90084	2491.6	1	0.584827												2	65.6852	33.0251	1.2897	1335.73	3	0.643292	30.9915
2	72.9612	8.44503	18.5938	2492.9	4	0.65216												2	49.6174	41.7329	8.64971	3183.41	3	0.550398	73.8609
2	81.1037	5.39444	13.5019	2513.96	1	0.0646616												2	65.434	28.2669	6.29915	3887.45	3	0.50245	90.1961
2	74.7801	7.70705	17.5129	2516.32	4	0.558322												2	69.4801	9.08714	21.4327	460.145	4	0.71874	10.6762	M
2	82.2832	7.90321	9.81357	2566.47	1	0.355128												2	70.8595	9.12354	20.017	441.613	4	0.713083	10.2462
2	80.9632	8.94619	10.0906	2561.93	1	0.247381												2	71.5773	7.4137	21.009	2344.59	4	0.698335	54.3989
2	70.9318	18.0762	10.992	4061.96	4	0.298837												2	69.3999	11.6723	18.9279	468.864	4	0.678171	10.8785
2	76.5481	18.3691	5.08283	4053.8	1	0.186307												2	72.9612	8.44503	18.5938	2492.9	4	0.65216	57.8399
2	90.5705	7.2773	2.15225	4300.68	1	0.707054												2	63.5576	9.52503	26.9173	459.913	4	0.632821	10.6708
2	86.3205	4.41987	9.25961	4263.04	1	0.558109												2	67.1257	5.84182	27.0325	2535.92	4	0.631026	58.838
2	95.5716	2.13273	2.29568	4286.23	1	0.66042												2	62.1566	14.0747	23.7686	2565.7	4	0.559786	59.5291
2	83.8263	11.6466	4.52712	4281.03	1	0.590967												2	74.7801	7.70705	17.5129	2516.32	4	0.558322	58.3832
2	89.9531	5.64554	4.40141	4257.2	1	0.70635												2	77.061	3.0327	19.9063	446.434	4	0.429916	10.3581
2	76.3042	20.721	2.97484	3903.71	1	0.220415												1	31.5349	62.0083	6.45684	1643.57	5	0.626341	38.1339	NM
2	65.434	28.2669	6.29915	3887.45	3	0.50245												2	32.7024	63.47	3.82767	4293.48	5	0.580081	99.6168
2	64.2148	31.8632	3.92206	2540.76	3	0.659193												1	22.5793	66.5036	10.9171	955.763	5	0.567478	22.1755
2	36.913	57.4832	5.6038	2535.63	5	0.424736												1	17.5884	66.4735	15.9381	3901.51	5	0.446859	90.5224
2	67.1257	5.84182	27.0325	2535.92	4	0.631026												2	36.913	57.4832	5.6038	2535.63	5	0.424736	58.8313
2	62.1566	14.0747	23.7686	2565.7	4	0.559786
2	97.5152	1.38216	1.1026	2364.62	1	0.617724
2	94.2992	2.96794	2.73283	2358.98	1	0.6816
2	60.7861	36.2173	2.99664	1369.74	3	0.753889
2	88.595	4.62331	6.78171	1344.77	1	0.658223
2	65.6852	33.0251	1.2897	1335.73	3	0.643292
2	17.8619	72.9711	9.167	3121.36	5	0.256731
2	39.9648	50.9379	9.09728	3146.9	5	0.119673
2	57.1371	36.2685	6.59438	3193.84	3	0.757689
2	49.6174	41.7329	8.64971	3183.41	3	0.550398
2	83.0828	15.038	1.8792	3400.26	1	0.545689
2	32.7024	63.47	3.82767	4293.48	5	0.580081
2	54.4229	43.4409	2.1362	4310.33	3	0.664203
2	86.2596	12.3565	1.38393	3560.13	1	0.641832

## Sheet: HH17e3
ALL CELLS									Non clone cells (silhouette <0.4)									Clone cells (silhouette >0.4)
Cell Type	C1	C2	C3	Y	Clone nb	silhouette_idx4			Cell Type	C1	C2	C3	Y	Clone nb	silhouette_idx4	Axis level		Cell Type	C1	C2	C3	Y	Clone nb	silhouette_idx4	Axis level	Assigned Clone type
1	31.702	20.9815	47.3165	1243.87	4	0.393021			1	31.702	20.9815	47.3165	1243.87	4	0.393021	69.1037		2	8.97623	58.1186	32.9052	1342.74	1	0.688642	74.5964	NM
1	29.6797	27.6398	42.6805	1261.82	4	0.516697			1	60.3414	13.3639	26.2947	1534.14	2	0.384038	85.2303		2	6.95346	63.9069	29.1396	1242.33	1	0.671005	69.0183
1	13.5688	33.5835	52.8477	1295.8	4	0.374652			1	13.5688	33.5835	52.8477	1295.8	4	0.374652	71.9887		1	5.10607	57.1402	37.7537	1553.55	1	0.655502	86.3086
1	19.9984	30.3407	49.6608	1297.02	4	0.589431			2	17.1094	48.3973	34.4932	1534.65	1	0.300351	85.2583		2	10.9818	55.4909	33.5273	1251.98	1	0.645315	69.5544
1	25.6184	21.2033	53.1783	1412.59	4	0.519028			1	33.4152	30.2675	36.3173	1598.72	4	0.287733	88.8176		1	4.05405	67.5676	28.3784	1394.2	1	0.639906	77.4556
1	53.6697	21.2364	25.0938	1447.37	2	0.748608			2	13.8766	44.9759	41.1475	1227	1	0.114952	68.1667		2	12.3438	56.7898	30.8664	1222.93	1	0.639523	67.9408
1	50.5354	21.5069	27.9577	1461.15	2	0.784959			2	25.0402	44.8426	30.1172	131.942	4	-0.0922972	7.33011		1	3.36711	57.2082	39.4246	1496.46	1	0.624259	83.1366
1	60.3414	13.3639	26.2947	1534.14	2	0.384038												1	7.64994	51.9147	40.4354	1507.37	1	0.537531	83.743
1	56.0122	18.5563	25.4314	1540.59	2	0.690765												1	8.21397	84.4209	7.36516	1028.99	1	0.456547	57.1663
1	33.4152	30.2675	36.3173	1598.72	4	0.287733												1	50.5354	21.5069	27.9577	1461.15	2	0.784959	81.175	NM
1	43.9501	22.2916	33.7584	1580.04	2	0.459382												2	51.1941	19.5991	29.2068	121.909	2	0.776521	6.77272
1	3.36711	57.2082	39.4246	1496.46	1	0.624259												1	53.6697	21.2364	25.0938	1447.37	2	0.748608	80.4096
1	5.10607	57.1402	37.7537	1553.55	1	0.655502												1	56.0122	18.5563	25.4314	1540.59	2	0.690765	85.5885
1	7.64994	51.9147	40.4354	1507.37	1	0.537531												1	43.9501	22.2916	33.7584	1580.04	2	0.459382	87.7802
1	4.05405	67.5676	28.3784	1394.2	1	0.639906												2	76.8344	9.1433	14.0223	1405.03	3	0.802718	78.0574	M
1	8.21397	84.4209	7.36516	1028.99	1	0.456547												2	74.4681	9.57447	15.9574	1263.94	3	0.76494	70.2191
2	80.5405	7.56757	11.8919	1525.57	3	0.749333												2	80.5405	7.56757	11.8919	1525.57	3	0.749333	84.7539
2	71.3054	9.28529	19.4093	1440.14	3	0.604325												2	72.5299	14.1644	13.3057	1524.41	3	0.697953	84.6894
2	72.5299	14.1644	13.3057	1524.41	3	0.697953												2	77.7027	15.5405	6.75676	1276.67	3	0.657025	70.9263
2	76.8344	9.1433	14.0223	1405.03	3	0.802718												2	71.3054	9.28529	19.4093	1440.14	3	0.604325	80.0076	N
2	77.7027	15.5405	6.75676	1276.67	3	0.657025												1	19.9984	30.3407	49.6608	1297.02	4	0.589431	72.0567
2	74.4681	9.57447	15.9574	1263.94	3	0.76494												1	25.6184	21.2033	53.1783	1412.59	4	0.519028	78.4773
2	12.3438	56.7898	30.8664	1222.93	1	0.639523												1	29.6797	27.6398	42.6805	1261.82	4	0.516697	70.1013
2	10.9818	55.4909	33.5273	1251.98	1	0.645315
2	13.8766	44.9759	41.1475	1227	1	0.114952
2	6.95346	63.9069	29.1396	1242.33	1	0.671005
2	8.97623	58.1186	32.9052	1342.74	1	0.688642
2	17.1094	48.3973	34.4932	1534.65	1	0.300351
2	51.1941	19.5991	29.2068	121.909	2	0.776521
2	25.0402	44.8426	30.1172	131.942	4	-0.0922972

[truncated: 1 more sheets: HH20e1]
