# Supplementary material for: Dynamics of primitive streak regression controls the fate of neuromesodermal progenitors in the chicken embryo
Source: eLife. 2021 Jul 6;10:e64819. doi: 10.7554/eLife.64819 (PMC8260230; doi:10.7554/eLife.64819)
Supplement: Figure 5—source data 1. [file elife-64819-fig5-data1.xlsx]

## Sheet: Figure 5B
	NMP			PSM/LP			EE				2way ANOVA NMP-LP/PSM							2way ANOVA NMP-EE							2way ANOVA PSM/LP-EE
1H	0.7375	0.799	0.76	0.5411	0.63	0.62	0.223	0.56	0.548		Table Analyzed	Source data Fog5:Time before ingression from track						Table Analyzed	Source data Fog5:Time before ingression from track						Table Analyzed	Source data Fog5:Time before ingression from track
2H	0.575	0.612	0.34	0.329	0.36	0.215	0.3617	0.28	0.188
											Two-way RM ANOVA	Matching: Both factors						Two-way RM ANOVA	Matching: Both factors						Two-way RM ANOVA	Matching: Both factors
											Assume sphericity?	Yes						Assume sphericity?	Yes						Assume sphericity?	Yes
											Alpha	0.05						Alpha	0.05						Alpha	0.05
											Source of Variation	% of total variation	P value	P value summary	Significant?			Source of Variation	% of total variation	P value	P value summary	Significant?			Source of Variation	% of total variation	P value	P value summary	Significant?
											Row Factor	57.49	0.0575	ns	No			Row Factor	26.67	0.1932	ns	No			Row Factor	53.29	0.1518	ns	No
											Column Factor	26.67	0.0214	*	Yes			Column Factor	45.66	0.0343	*	Yes			Column Factor	7.894	0.0852	ns	No
											Row Factor x Column Factor	0.2897	0.3061	ns	No			Row Factor x Column Factor	1.188	0.5175	ns	No			Row Factor x Column Factor	4.114	0.3705	ns	No
											Subject x Row Factor	7.228						Subject x Row Factor	14.3						Subject x Row Factor	20.78
											Subject x Column Factor	1.179						Subject x Column Factor	3.299						Subject x Column Factor	1.539
											Subject	6.832						Subject	4.973						Subject	6.119
											ANOVA table	SS	DF	MS	F (DFn, DFd)	P value		ANOVA table	SS	DF	MS	F (DFn, DFd)	P value		ANOVA table	SS	DF	MS	F (DFn, DFd)	P value
											Row Factor	0.2287	1	0.2287	F (1, 2) = 15.91	P=0.0575		Row Factor	0.1346	1	0.1346	F (1, 2) = 3.729	P=0.1932		Row Factor	0.1606	1	0.1606	F (1, 2) = 5.129	P=0.1518
											Column Factor	0.1061	1	0.1061	F (1, 2) = 45.26	P=0.0214		Column Factor	0.2304	1	0.2304	F (1, 2) = 27.68	P=0.0343		Column Factor	0.0238	1	0.0238	F (1, 2) = 10.26	P=0.0852
											Row Factor x Column Factor	0.001152	1	0.001152	F (1, 2) = 1.857	P=0.3061		Row Factor x Column Factor	0.005994	1	0.005994	F (1, 2) = 0.6071	P=0.5175		Row Factor x Column Factor	0.0124	1	0.0124	F (1, 2) = 1.313	P=0.3705
											Subject x Row Factor	0.02876	2	0.01438				Subject x Row Factor	0.07219	2	0.03609				Subject x Row Factor	0.06264	2	0.03132
											Subject x Column Factor	0.004689	2	0.002344				Subject x Column Factor	0.01665	2	0.008324				Subject x Column Factor	0.00464	2	0.00232
											Subject	0.02718	2	0.01359				Subject	0.0251	2	0.01255				Subject	0.01845	2	0.009223
											Residual	0.001241	2	0.0006205				Residual	0.01975	2	0.009874				Residual	0.01889	2	0.009446
											Difference between row means							Difference between row means							Difference between row means
											Mean of 1H	0.6813						Mean of 1H	0.6046						Mean of 1H	0.5204
											Mean of 2H	0.4052						Mean of 2H	0.3928						Mean of 2H	0.289
											Difference between means	0.2761						Difference between means	0.2118						Difference between means	0.2314
											SE of difference	0.06923						SE of difference	0.1097						SE of difference	0.1022
											95% CI of difference	-0.02177 to 0.5740						95% CI of difference	-0.2601 to 0.6837						95% CI of difference	-0.2082 to 0.6710
											Difference between column means							Difference between column means							Difference between column means
											Mean of NMP	0.6373						Mean of NMP	0.6373						Mean of PSM/LP	0.4492
											Mean of PSM/LP	0.4492						Mean of EE	0.3601						Mean of EE	0.3601
											Difference between means	0.1881						Difference between means	0.2771						Difference between means	0.08907
											SE of difference	0.02795						SE of difference	0.05268						SE of difference	0.02781
											95% CI of difference	0.06779 to 0.3083						95% CI of difference	0.05049 to 0.5038						95% CI of difference	-0.03058 to 0.2087
											Interaction CI							Interaction CI							Interaction CI
											Mean diff, A1 - B1	0.1685						Mean diff, A1 - B1	0.3218						Mean diff, A1 - B1	0.1534
											Mean diff, A2 - B2	0.2077						Mean diff, A2 - B2	0.2324						Mean diff, A2 - B2	0.02477
											(A1 -B1) - (A2 - B2)	-0.0392						(A1 -B1) - (A2 - B2)	0.0894						(A1 -B1) - (A2 - B2)	0.1286
											95% CI of difference	-0.1630 to 0.08456						95% CI of difference	-0.4043 to 0.5831						95% CI of difference	-0.3543 to 0.6115
											(B1 - A1) - (B2 - A2)	0.0392						(B1 - A1) - (B2 - A2)	-0.0894						(B1 - A1) - (B2 - A2)	-0.1286
											95% CI of difference	-0.08456 to 0.1630						95% CI of difference	-0.5831 to 0.4043						95% CI of difference	-0.6115 to 0.3543
											Data summary							Data summary							Data summary
											Number of columns (Column Factor)	2						Number of columns (Column Factor)	2						Number of columns (Column Factor)	2
											Number of rows (Row Factor)	2						Number of rows (Row Factor)	2						Number of rows (Row Factor)	2
											Number of subjects (Subject)	3						Number of subjects (Subject)	3						Number of subjects (Subject)	3
											Number of missing values	0						Number of missing values	0						Number of missing values	0
