# Supplementary material for: Dynamics of primitive streak regression controls the fate of neuromesodermal progenitors in the chicken embryo
Source: eLife. 2021 Jul 6;10:e64819. doi: 10.7554/eLife.64819 (PMC8260230; doi:10.7554/eLife.64819)
Supplement: Figure 6—source data 1. [file elife-64819-fig6-data1.xlsx]

## Sheet: Figure 6A
T/SOX2 cells
35+ s	30 s	15-20 s	5-10 s	Stage 5	Stage 4
390	554	446	396	215	28
356	505	484	340	250	52
210	644	458	386	284	43
300	452	387	325	317	39
	655	475	411	197	28
			341	238	20
				197	16
				107
				103
				202
				234

## Sheet: Figure 6F
	Posterior	Anterior			Histogram
	0.8	8.8			Bin Center	Posterior	Anterior
	1.6	7.3			0	29	1
	0.3	2.3			1	35	8
	0.5	0.3			2	13	10
	0.3	9.7			3	3	2
	0.8	8.8			4	0	3
	0.6	8.3			5	0	6
	0.7	7.2			6	0	1
	1.1	0.5			7	0	11
	0.6	0.7			8	0	6
	0.7	3.9			9	0	13
	0.7	0.9			10	0	13
	0.4	8.5			11	0	4
	0.4	10			12	0	1
	0.9	7.1
	0.7	8.5
	1.1	8.6
	0.8	7.6
	0.6	8.2
	0.3	7.3
	0.5	2.4
	0.8	1.7
	0.9	7.3
	1.7	9.7
	1.5	10.5
	2.6	6.5
	0.3	8.1
	3.3	10.1
	2	10.1
	1.2	8.2
	0.9	8.6
	0.4	10.3
	2.2	10.3
	1.1	10.4
	0.9	2
	0.2	1.9
	2	1.4
	2.1	7.8
	0.8	8.5
	0.6	4.4
	1.1	8.9
	0.5	1.9
	1	9
	0.8	11.5
	1.2	6.8
	0.2	5
	1.1	10.8
	0.8	0.5
	1.8	1.5
	0.2	1.8
	0.3	5
	2	9.5
	2	4
	2.4	9.2
	0.2	5.2
	1.1	9.8
	0.8	4.8
	0.3	0.8
	0.3	8.9
	0.1	4.8
	0.2	1.7
	0.1	11
	0.7	10
	0.4	0.8
	1.6	9.9
	0.3	6.6
	1	0.7
	1.5	10.8
	0.5	10
	0.3	6.8
	3.4	5.9
	0.4	5.4
	0.1	2.8
	0.1	2.6
	0.2	1.9
	0.4	6.8
	0.2	7.4
	0.3	9.3
	0.1	9.3
	0.3

## Sheet: Figure 6G
Time between cell division
6.1
3.9
4.5
5.2
6.5
3
4.8
2.9
2.9
5.9
4.2
4.5

## Sheet: Figure 6C
	stage5				5-10s				15-20s				20+						Significance tests - st5												Significance tests - 5s												Significance tests - 15s
	NMP	LP	EE		NMP	LP	EE		NMP	LP	EE		NMP	LP	EE
250um	25.7	31.87	29.44		15.43	12.07	12.21		12.96	7.08	5.18		7.27	7.8	6.14
750um	16.25	16.57	19.69		12.37	11.16	10.65		11.34	4.69	6.96		4.04	6.4	6.39
1200um	7.01	6.38	9.25		5.28	9.07	7.53		9.6	3.97	6.69		2.72						Table Analyzed	Source data Fig6:Quanitf st5-20s pH3- st5			Table Analyzed	Source data Fig6:Quanitf st5-20s pH3- st5			Table Analyzed	Source data Fig6:Quanitf st5-20s pH3- st5			Table Analyzed	Source data Fig6:Quanitf st5-20s pH3- 5s			Table Analyzed	Source data Fig6:Quanitf st5-20s pH3- 5s			Table Analyzed	Source data Fig6:Quanitf st5-20s pH3- 5s			Table Analyzed	Source data Fig6:Quanitf st5-20s pH3- 15s			Table Analyzed	Source data Fig6:Quanitf st5-20s pH3- 15s
																			Column B	LP			Column C	EE			Column C	EE			Column B	LP			Column C	EE			Column C	EE			Column B	Data Set-B			Column C	Data Set-C
																			vs.	vs.			vs.	vs.			vs.	vs.			vs.	vs.			vs.	vs.			vs.	vs.			vs.	vs.			vs.	vs.
																			Column A	NMP			Column B	LP			Column A	NMP			Column A	NMP			Column A	NMP			Column B	LP			Column A	Data Set-A			Column A	Data Set-A
																			Unpaired t test				Unpaired t test				Unpaired t test				Unpaired t test				Unpaired t test				Unpaired t test				Unpaired t test				Unpaired t test
																			P value	0.0017			P value	0.1352			P value	0.0022			P value	0.2024			P value	0.0187			P value	0.0278			P value	0.8193			P value	0.593
																			P value summary	**			P value summary	ns			P value summary	**			P value summary	ns			P value summary	*			P value summary	*			P value summary	ns			P value summary	ns
																			Significantly different (P < 0.05)?	Yes			Significantly different (P < 0.05)?	No			Significantly different (P < 0.05)?	Yes			Significantly different (P < 0.05)?	No			Significantly different (P < 0.05)?	Yes			Significantly different (P < 0.05)?	Yes			Significantly different (P < 0.05)?	No			Significantly different (P < 0.05)?	No
																			One- or two-tailed P value?	Two-tailed			One- or two-tailed P value?	Two-tailed			One- or two-tailed P value?	Two-tailed			One- or two-tailed P value?	Two-tailed			One- or two-tailed P value?	Two-tailed			One- or two-tailed P value?	Two-tailed			One- or two-tailed P value?	Two-tailed			One- or two-tailed P value?	Two-tailed
																			t, df	t=7.496, df=4			t, df	t=1.868, df=4			t, df	t=6.981, df=4			t, df	t=1.523, df=4			t, df	t=3.824, df=4			t, df	t=3.380, df=4			t, df	t=0.2438, df=4			t, df	t=0.5800, df=4
																			How big is the difference?				How big is the difference?				How big is the difference?				How big is the difference?				How big is the difference?				How big is the difference?				How big is the difference?				How big is the difference?
																			Mean of column A	29			Mean of column B	13.24			Mean of column A	29			Mean of column A	13.24			Mean of column A	13.24			Mean of column B	11.39			Mean of column A	8.407			Mean of column A	8.407
																			Mean of column B	13.24			Mean of column C	8.407			Mean of column C	8.407			Mean of column B	11.39			Mean of column C	7.293			Mean of column C	7.293			Mean of column B	7.663			Mean of column C	6.753
																			Difference between means (B - A) ± SEM	-15.77 ± 2.103			Difference between means (C - B) ± SEM	-4.830 ± 2.586			Difference between means (C - A) ± SEM	-20.60 ± 2.950			Difference between means (B - A) ± SEM	-1.843 ± 1.210			Difference between means (C - A) ± SEM	-5.943 ± 1.554			Difference between means (C - B) ± SEM	-4.100 ± 1.213			Difference between means (B - A) ± SEM	-0.7433 ± 3.048			Difference between means (C - A) ± SEM	-1.653 ± 2.851
																			95% confidence interval	-21.61 to -9.927			95% confidence interval	-12.01 to 2.350			95% confidence interval	-28.79 to -12.41			95% confidence interval	-5.203 to 1.517			95% confidence interval	-10.26 to -1.628			95% confidence interval	-7.468 to -0.7324			95% confidence interval	-9.207 to 7.720			95% confidence interval	-9.568 to 6.261
																			R squared (eta squared)	0.9335			R squared (eta squared)	0.4658			R squared (eta squared)	0.9242			R squared (eta squared)	0.3671			R squared (eta squared)	0.7852			R squared (eta squared)	0.7407			R squared (eta squared)	0.01465			R squared (eta squared)	0.07757
																			F test to compare variances				F test to compare variances				F test to compare variances				F test to compare variances				F test to compare variances				F test to compare variances				F test to compare variances				F test to compare variances
																			F, DFn, Dfd	2.674, 2, 2			F, DFn, Dfd	4.554, 2, 2			F, DFn, Dfd	1.703, 2, 2			F, DFn, Dfd	4.629, 2, 2			F, DFn, Dfd	1.006, 2, 2			F, DFn, Dfd	4.655, 2, 2			F, DFn, Dfd	1.440, 2, 2			F, DFn, Dfd	2.075, 2, 2
																			P value	0.5444			P value	0.3601			P value	0.7399			P value	0.3553			P value	0.9972			P value	0.3537			P value	0.8197			P value	0.6503
																			P value summary	ns			P value summary	ns			P value summary	ns			P value summary	ns			P value summary	ns			P value summary	ns			P value summary	ns			P value summary	ns
																			Significantly different (P < 0.05)?	No			Significantly different (P < 0.05)?	No			Significantly different (P < 0.05)?	No			Significantly different (P < 0.05)?	No			Significantly different (P < 0.05)?	No			Significantly different (P < 0.05)?	No			Significantly different (P < 0.05)?	No			Significantly different (P < 0.05)?	No
																			Data analyzed				Data analyzed				Data analyzed				Data analyzed				Data analyzed				Data analyzed				Data analyzed				Data analyzed
																			Sample size, column A	3			Sample size, column B	3			Sample size, column A	3			Sample size, column A	3			Sample size, column A	3			Sample size, column B	3			Sample size, column A	3			Sample size, column A	3
																			Sample size, column B	3			Sample size, column C	3			Sample size, column C	3			Sample size, column B	3			Sample size, column C	3			Sample size, column C	3			Sample size, column B	3			Sample size, column C	3

## Sheet: Figure 6D
	Anterior						Posterior
%age of dividing cells	46	35	31	30	39	26	35	17	20	17	23	15			Table Analyzed	Source data Fig6:Quail dividing cell st4-5
															Column B	Posterior
															vs.	vs.
															Column A	Anterior
															Paired t test
															P value	0.0001
															P value summary	***
															Significantly different (P < 0.05)?	Yes
															One- or two-tailed P value?	Two-tailed
															t, df	t=10.85, df=5
															Number of pairs	6
															How big is the difference?
															Mean of differences (B - A)	-13.33
															SD of differences	3.011
															SEM of differences	1.229
															95% confidence interval	-16.49 to -10.17
															R squared (partial eta squared)	0.9592
															How effective was the pairing?
															Correlation coefficient (r)	0.9141
															P value (one tailed)	0.0054
															P value summary	**
															Was the pairing significantly effective?	Yes
