# Supplementary material for: Dynamics of primitive streak regression controls the fate of neuromesodermal progenitors in the chicken embryo
Source: eLife. 2021 Jul 6;10:e64819. doi: 10.7554/eLife.64819 (PMC8260230; doi:10.7554/eLife.64819)
Supplement: Figure 7—figure supplement 1—source data 1. [file elife-64819-fig7-figsupp1-data1.xlsx]

## Sheet: Sheet1
		Number of division type
symmetric NMP		9
Asymmetric		15
Symmetric Mesoderm		9
