# Supplementary material for: Dynamics of primitive streak regression controls the fate of neuromesodermal progenitors in the chicken embryo
Source: eLife. 2021 Jul 6;10:e64819. doi: 10.7554/eLife.64819 (PMC8260230; doi:10.7554/eLife.64819)
Supplement: Supplementary file 1. [file elife-64819-supp1.xlsx]

## Sheet: stage5
Cluster_names	Short name	Cell number
Epiblast	EPI	651
Mesoderm	Meso	564
Neural	Neural	397
Neuromesodermal progenitors	NMP	305
Endoderm	Endo	80
Notochord	NC	62
	Total	2059

## Sheet: 6 somites
Cluster_names	Short name	Cell number
Posterior Primitive streak	postPS	439
Neuromesodermal Progenitors	NMP	365
Neural Plate	Neural	249
Lateral Plate	LP	197
Presomitic mesoderm	PSM	186
Endoderm	Endo	144
Notochord	NC	48
	Total	1628

## Sheet: 35 somites
Cluster_names	Short name	Cell number
Lateral Plate	LP	805
Presomitic mesoderm	PSM	645
Neural tube	Neural	588
Neuromesodermal progenitors	NMP	506
Somite	Somite	463
Ectoderm	Ecto	288
Lateral Plate 2	LP2	132
Blood	Blood	72
Notochord	NC	62
	Total	3561

## Sheet: all_stages
Cluster_names	Short name	Cell number
Posterior PS	postPS	1366
Epiblast	EPI	1295
Presomitic mesoderm	PSM	970
Neuromesodermal Progenitors	NMP	858
Mesoderm	Meso	759
Neural	Neural	700
Somite	Somite	461
Ectoderm	Ecto	394
LP	LP	334
Endoderm	Endo	314
Lateral Plate 2	LP2	266
Notochord	NC	203
Blood	Blood	72
	Total	7992

## Sheet: subset (Figure 3H )
Cluster_names	Short name	Cell number
Presomitic mesoderm	PSM	838
Neuromesodermal Progenitors	NMP	823
Neural	Neural	586
Somite	Somite	554
	Total	2801

## Sheet: cell_subset chick (Figure3H&5A)
Leiden	st5s1	st5s2	6s1	6s2	35s1	35s2	Total
PSM	52	58	119	102	255	252	838
NMP	99	137	117	118	171	181	823
NT	9	11	26	15	253	272	586			Total number of cells
Somite	6	14	10	16	247	261	554			2801
Leiden	st5s1	st5s2	6s1	6s2	35s1	35s2	Total			Total number of cells
NMPearly	82	119	79	93	31	49	453			706
NMPlate	8	6	25	15	100	99	253

## Sheet: data(Figure 4A,B & 5E) 
Mouse (Figure 4)					Day	PSM	NMP	Neural_Tube		Day	NMP_early	NMP_late
Cluster_names	Short name	Cell number			7	0	58	0		7	58	0
Neuromesodermal progenitors	NMP	5628			7.5	106	395	55		7.5	395	0
Neural tube	NT	3519			7.15	2	219	6		7.15	219	0
Presomitic Mesoderm	PSM	2925			7.25	0	75	0		7.25	75	0
					7.75	402	713	291		7.75	713	0
					8	869	1537	460		8	1537	0
Mouse (Figure 5E-F)					8.5	426	798	1158		8.5	0	798
Cluster_names	Short name	Cell number			8.25	710	1230	943		8.25	1230	0
NMPearly	NMP_early	4227			9.5	410	603	606		9.5	0	603
NMPlate	NMP_late	1401			Total	2925	5628	3519	12072	Total	4227	1401	5628
Chicken (Figure 4)					Day	PSM	NMP	Neural_Tube
Cluster_names	Short name	Cell number			Stage 5HH	69	84	16
Neuromesodermal progenitors	NMP	895			6 Somites	329	331	82
Neural tube	NT	551			35 Somites	518	480	453
Presomitic Mesoderm	PSM	916			Total	916	895	551	2362

## Sheet: Mouse (Figure 3K)
Cluster_names	Short name	Cell number			Leiden	E7	E7.25	E7.5	E7.75	E8	E8.25	E8.5	Mixed_Gastrulation	E9.5	Total number of cells
Neural tube	NT	8181			Somite	15	10	323	724	1316	1390	1315	169	610	5872
Presomitic Mesoderm	PSM	7405			NT	2	0	4	51	418	3250	3770	5	681	8181
Somite	S	5872			NMP	5	2	123	842	2022	1364	906	52	309	5625
Neuromesodermal progenitor	NMP	5625			PSM	146	171	948	1174	1944	1349	562	431	680	7405
															27083
		27083
