# Supplementary material for: Dynamics of primitive streak regression controls the fate of neuromesodermal progenitors in the chicken embryo
Source: eLife. 2021 Jul 6;10:e64819. doi: 10.7554/eLife.64819 (PMC8260230; doi:10.7554/eLife.64819)
Supplement: Supplementary file 2. — Each cluster is divided into three subcolumns where the first column indicates the gene name, the second column the p value, and the third the log fold changes. All the tables are ranked by z-score. The expression of the 10 first genes with the highest log fold change for each cluster is shown in the dotplots. [file elife-64819-supp2.xlsx]

## Sheet: Chick_Stage5HH (Figure 3A)
Rank	Epiblast	pvals	log2foldchanges	Mesoderm	pvals	log2foldchanges	Neural	pvals	log2foldchanges	NMP	pvals	log2foldchanges	Endoderm	pvals	log2foldchanges	Notochord	pvals	log2foldchanges			Epiblast						Mesoderm						Neural
0	RPS2	4.38654e-24	0.7079	CDH2	8.80436e-66	1.86199	CLDN1	8.71394e-56	1.57129	TBXT	8.5183e-26	1.47328	KRT7	7.52673e-21	3.6035	CHRD	4.55113e-12	4.00041
1	PLPP1	2.0241e-21	0.825076	AGRP	1.90064e-65	2.86749	PLPP1	4.83826e-37	1.26482	GJA1	9.24583e-17	1.01887	KRT18	1.17231e-11	2.13892	SHISA2	4.88536e-06	1.59475		Epiblast						Epiblast						Epiblast
2	CALM2	2.70687e-21	0.762202	AKAP12	3.62964e-41	1.94429	GJA1	2.15437e-30	1.12559	DLL1	1.78605e-15	1.57352	NDRG1	3.67553e-10	2.64044	TMSB4X	6.66396e-06	0.589916		Mesoderm						Mesoderm						Mesoderm
3	RPS15A	4.65325e-21	0.63393	ALDH1A2	1.13513e-33	2.32152	SLC16A1	2.69469e-13	0.847209	CDH2	4.19607e-13	1.02748	SOX17	1.01917e-09	3.00304	TCF7L2	0.000379025	1.55166		Neural						Neural						Neural
4	HSP90AA1	8.48587e-21	0.661748	NUCKS1	3.40311e-32	1.04654	MSX1	4.60309e-13	1.12173	WLS	9.90017e-13	1.05486	ID2	1.85998e-09	1.12378	APLP2	0.000441431	0.851223		NMP						NMP						NMP
5	LARP7	1.69824e-19	0.990134	HSPA5	1.62521e-24	0.967181	CTSV	5.49858e-13	1.28656	MSGN1	8.29074e-12	1.46765	CALM2	2.40909e-09	0.906295	HSP90B1	0.000542582	0.862252		Endoderm						Endoderm						Endoderm
6	Wpkci-7	6.19976e-17	0.949266	PRTG	1.52952e-21	1.02385	PDGFA	1.29124e-11	1.66991	FN1	2.56008e-07	0.874649	PLCXD1	1.68509e-08	4.07601	NOTO	0.000546554	2.73805		Notochord						Notochord						Notochord
7	UCH-L1	3.64477e-16	0.908223	PALD1	3.55585e-18	0.781827	XPA	4.49746e-11	0.774808	AKAP12	4.61348e-07	0.843778	ANO3	1.46201e-07	2.4283	CDH2	0.00242832	0.707858
8	EEF1A1	1.2438e-15	0.376297	CLEC19A	1.9051e-17	2.07522	EPCAM	2.21828e-09	0.846643	HSPA5	9.42534e-07	0.653795	EIF4A2	1.5461e-07	0.944906	TBXT	0.00391825	0.591372
9	YWHAE	2.7326e-15	0.603881	TUBA1B	3.17567e-16	0.368404	MFGE8	2.60623e-09	1.17795	ATP2B1	2.48505e-05	0.938518	RGN	3.08127e-07	2.21037	FOXA2	0.00416016	2.19814
10	ANP32E	4.81232e-15	0.881738	EEF1D	9.48409e-16	0.488829	SFRP2	1.3114e-08	1.44919	WNT8A	2.60971e-05	1.57358	CNN3	1.17171e-06	0.954202	SOX17	0.00795591	1.94643
11	AP1S3	6.29863e-15	1.18473	APLP2	2.61997e-15	1.10156	P4HB	2.26337e-07	0.515414	KRAS	3.62539e-05	0.78527	GATA5	1.43906e-06	1.5908	GPC4	0.00843556	1.16652
12	RANBP1	1.13755e-14	0.659473	JAM3	9.88324e-15	1.29882	SP5	3.96286e-07	0.674888	MESP1	3.79256e-05	1.3511	PITX2	1.06612e-05	3.70326	LGMN	0.0084886	1.62539
13	PPIA	2.54549e-14	0.413133	NOTCH1	1.20813e-14	1.35268	DAG1	5.62008e-07	1.36477	WNT5A	6.25674e-05	1.42306	FAM89A	1.46441e-05	1.23895	ARL6IP1	0.00938547	0.972241
14	YWHAQ	8.47202e-14	0.580884	GATA5	1.22091e-14	1.50323	PLS3	1.10154e-05	0.710264	APLP2	9.40283e-05	0.71307	MAPK6	2.32437e-05	1.16677	SFRP1	0.0111047	1.45166			NMP						Endoderm						Notochord
15	CIRBP	1.03483e-13	0.487529	FAU	2.81702e-14	0.492031	GBX2	2.32644e-05	1.03989	APCDD1	0.000134526	2.14628	GNB1	5.62663e-05	0.844395	HAS2	0.0123991	1.36578
16	TMSB15B	3.72386e-13	0.481781	MSGN1	7.4196e-14	1.46518	ATP1A1	3.42022e-05	0.808045	TUBA1C	0.000230894	0.49563	COTL1	6.88072e-05	1.72939	HES4	0.0126187	1.12617		Epiblast						Epiblast						Epiblast
17	RBBP4	4.1836e-13	0.614902	ACTB	2.25202e-13	0.325295	NT5DC2	0.00014287	0.411015	CXCL14	0.000533214	1.57824	RPS2	7.99306e-05	0.472851	SERPINE2	0.0139873	1.68473		Mesoderm						Mesoderm						Mesoderm
18	PSMA5	5.54419e-13	0.859328	MEOX1	1.85459e-12	3.14529	PDIA4	0.000198087	0.677368	WNT5B	0.000593856	1.61244	PABPC1	0.000107409	0.554483	SST	0.0220983	2.87296		Neural						Neural						Neural
19	SRSF1	6.7223e-13	0.51532	MESP1	1.98672e-12	1.8813	B2M	0.000201686	0.613121	SLC16A1	0.000818986	0.531803	SGK1	0.000165573	2.07098	BSG	0.0255654	1.22586		NMP						NMP						NMP
20	G3BP1	8.89696e-13	0.824095	NME2	2.82308e-11	0.331575	HTRA1	0.000207621	0.910422	VRTN	0.00193704	0.615689	TPM4	0.000262197	1.17553	OLFML3	0.0285532	2.60019		Endoderm						Endoderm						Endoderm
21	PRELID1	1.11573e-12	0.73143	TUBA1C	1.23406e-10	0.602839	PKM	0.000290233	0.225353	DHX37	0.0021207	0.703694	ATP5MC1	0.000286073	0.555618	SSR1	0.0292498	0.612121		Notochord						Notochord						Notochord
22	EIF4G2	1.7154e-12	0.449111	RDH10	3.58096e-10	1.69325	ST14	0.000326447	1.06837	PRTG	0.00268737	0.467861	APOA1	0.000305443	2.32842	MYL6	0.0334367	0.730952
23	PRDX1	4.77736e-12	0.516637	SGPL1	3.77089e-10	1.41907	TMED7	0.000380837	0.507916	CLDN1	0.00287794	0.374984	SLC25A3	0.000322871	0.567567	HSPA5	0.0347866	0.456362
24	PTGES3	9.06457e-12	0.631902	PPIB	4.17331e-10	0.541315	FGFR1	0.000539768	0.68347	PDIA6	0.00314486	0.542705	TPM1	0.000349387	0.813418	SALL1	0.0410406	0.780405
25	MARCKSL1	2.38156e-11	0.713577	RBBP6	7.03742e-10	0.971151	NUDT16L1	0.00103358	0.297485	SLC25A6	0.00347001	0.276039	KRT19	0.000359987	0.895393	CXCR4	0.0448707	2.25117
26	EIF3E	3.54918e-11	0.736158	TWIST1	1.13018e-08	2.4874	SPTBN1	0.00111335	1.24252	ALDOC	0.00392325	0.332546	LSP1	0.000465293	2.02726	ACTG1	0.0504458	0.222171
27	PCBP2	4.04181e-11	0.565778	LRIG3	1.34241e-08	1.75986	MDK	0.00111504	0.314538	P4HB	0.00499542	0.354224	METAP2	0.000478896	0.522768	JARID2	0.0529251	0.739902
28	CBX3	4.81808e-11	0.689853	CANX	1.81962e-08	0.902589	ID2	0.00129914	0.366955	MSX1	0.00646328	0.54212	MYL9	0.000511261	0.992532	CTNNB1	0.0565794	0.333637
29	EIF3M	3.15147e-10	0.557824	ALDOC	2.05557e-08	0.463013	MARCKSL1	0.00131556	0.324799	FGF19	0.00668174	1.81061	WEE1	0.000605047	0.94194	ACTB	0.0704847	0.134522
30	PABPC1	4.08228e-10	0.480452	HDGF	2.75471e-08	0.465335	ZFYVE19	0.00136311	0.737944	SKAP2	0.00929816	0.772265	VCP	0.000707533	0.616584	WLS	0.0808568	0.392624
31	METAP2	4.23997e-10	0.668961	TMSB4X	2.84641e-08	0.340919	SLC34A2	0.00157677	1.74254	CYP1B1	0.00931353	2.13239	PDZK1IP1	0.000833556	2.42931	TUBB4B	0.0878663	0.378197
32	CAPRIN1	4.88995e-10	0.802753	PTN	4.88493e-08	2.40227	PDIA6	0.0015985	0.459798	ATP5PB	0.0113156	0.288484	GAB1	0.000878765	2.71731	TMED10	0.0995263	0.474094
33	RPL27	4.90929e-10	0.453432	MEX3A	9.72356e-08	0.759287	METRNL	0.00207709	0.965872	TMED7	0.0152886	0.450185	LIN7C	0.000956927	1.62181	GLG1	0.0995263	0.867454
34	ERH	7.9692e-10	0.486843	EEF2	1.16903e-07	0.276656	AP1S3	0.00244502	0.53185	JAM3	0.0172091	0.568477	KPNA3	0.00113896	1.02585	CDCA3	0.105838	0.372893
35	PSMA1	9.23131e-10	0.99337	HSP90B1	1.7799e-07	0.627422	PPP4R2	0.00256142	0.455889	EPRS	0.0200628	0.398168	ACTR3	0.00114254	0.690233	KDELR2	0.107885	0.424071
36	RPL29	9.50662e-10	0.392498	JCAD	2.17738e-07	2.07078	MCAM	0.00297062	1.48513	MYCL	0.0211705	0.768994	AKR1D1	0.00153129	1.28425	PDIA4	0.114254	0.461533
37	RPL23A	1.09203e-09	0.397151	CD24	2.2864e-07	0.507117	HES5	0.00299395	1.88747	NKAIN4	0.0212914	0.642039	VIM	0.00154399	0.722892	STK10	0.115915	2.93185
38	PNRC1	1.67156e-09	0.647875	PARP1	2.31851e-07	0.536521	DDOST	0.00329128	0.56761	SP5	0.0214805	0.415329	MLF2	0.00154691	0.60032	CADM1	0.119197	0.935876
39	EIF3H	2.06281e-09	0.54545	TM7SF2	4.00987e-07	1.17131	IPO9	0.00344151	0.486221	MAGI3	0.0220038	1.21839	CLTA	0.00164764	0.87433	FBLN1	0.122711	1.87967
40	TRA2B	2.69706e-09	0.641847	TCF15	6.43616e-07	3.23427	ING5	0.00386027	0.654398	CLEC19A	0.0245036	0.698926	YWHAH	0.00168675	0.673851	SERINC1	0.123906	0.681094
41	SUMO2	3.55879e-09	0.54917	ZEB2	1.28578e-06	1.64514	RAD21	0.00405642	0.448736	CDX1	0.0260061	1.61494	YWHAE	0.00185057	0.37749	SEMA6A	0.128532	1.85852
42	ARPP19	3.96854e-09	0.559317	PRRC2C	1.72475e-06	0.609197	NPM3	0.00411467	0.21924	MEX3A	0.0283844	0.421078	SPIN1Z	0.00208583	1.08382	SPTAN1	0.133482	0.68441
43	RPS16	4.02371e-09	0.389632	RACK1	2.9179e-06	0.282437	FGFR3	0.00423973	0.928297	ITGB1	0.0291674	0.653112	CHMP2B	0.00222237	1.72859	DNAJC3	0.133673	0.877442
44	HSP90AB1	4.72582e-09	0.500097	ACTG1	3.23903e-06	0.267195	YEATS4	0.0044731	0.505717	TRIM8	0.0311779	0.68286	CAPRIN1	0.00222441	0.633297	PFDN6	0.139673	0.449205
45	GNB1	5.02413e-09	0.707178	WLS	6.55587e-06	0.491275	JUP	0.00458761	0.61985	ATP1B1	0.0315795	0.468688	TMSB4X	0.00229367	0.419389	AMY1A	0.154579	0.785996
46	GPX1	6.37451e-09	0.879707	EIF5B	6.95981e-06	0.522055	EPHA1	0.00505789	1.16636	EPHA1	0.0327095	1.11905	TRIM71	0.0025021	0.830685	GHITM	0.15718	0.320542
47	SLC25A5	7.76798e-09	0.542773	GDF3	1.45515e-05	2.00531	PDIA3	0.00586218	0.399319	ND4L	0.0327974	0.950653	LIMK2	0.00282954	2.54925	SPARC	0.16128	0.558442
48	COPS5	1.49794e-08	0.901036	NTM	1.67862e-05	1.69854	TNFSF10	0.00601308	0.614097	CKAP2	0.0342617	0.487297	CDK6	0.00321488	1.37837	POMC	0.172871	1.14336
49	WDR1	2.75557e-08	0.942577	FST	1.99893e-05	2.24432	RHOB	0.00633282	0.687438	SRPRA	0.0369254	0.564509	ALDH1A1	0.00328478	4.49859	C13H5orf15	0.174581	0.879657
50	CDCA7L	3.631e-08	0.736533	CADM1	2.13342e-05	1.29072	F2RL1	0.00653601	1.04669	UBE2H	0.0369562	0.699182	RPS15A	0.00338511	0.345036	MFAP2	0.175649	1.00325
51	HSPE1	4.36024e-08	0.432066	RTF1	4.09743e-05	0.652629	TKT	0.00695108	0.268212	MFGE8	0.0373066	0.56016	YWHAZ	0.00350749	0.45152	IGSF21	0.177405	2.09225
52	NCL	7.96953e-08	0.312789	AGRN	4.65157e-05	1.04845	SRPRB	0.00823919	0.628398	MYC	0.0411436	0.575961	SNAP23	0.00355882	1.25085	ACVR1	0.191119	0.53666
53	ENO1	8.07968e-08	0.326705	UBA52	5.41843e-05	0.227381	CENPF	0.00897702	0.531473	CTSV	0.0418402	0.372105	HSP90AB1	0.0035871	0.381653	APOA1	0.194195	0.848016
54	FRZB	8.46787e-08	1.26761	PCSK5	6.16566e-05	1.75117	EDNRB	0.00976479	1.14489	DDOST	0.0423619	0.545705	TP53BP2	0.0036595	1.25599	NAE1	0.195238	0.654886
55	ZDHHC6	1.11033e-07	0.893578	PPFIBP1	8.43826e-05	0.572433	UCH-L1	0.00982571	0.323277	RYK	0.0423735	0.619874	AP2M1	0.00392734	1.06808	Wpkci-7	0.198562	0.248165
56	UQCR10	1.25099e-07	0.544596	KLHL9	0.000106689	1.31266	HSPA5	0.0108795	0.273316	NUCB2	0.0435693	0.582652	FKBP4	0.00451614	0.529309	PRPF8	0.198733	0.266027
57	NUDT21	1.58649e-07	1.26004	YBX1	0.000121947	0.195831	DNMT3A	0.0111815	0.257379	EEF1D	0.0442586	0.188322	ARPC1A	0.00453951	1.09572	NUCKS1	0.204837	0.203362
58	IGF2BP3	1.6937e-07	0.43522	MTDH	0.000124682	0.932314	ASTL	0.0112916	1.51395	LONP1	0.0447332	0.456045	PRKCI	0.00461922	1.08799	ATG101	0.206508	0.726476
59	HELLS	2.24671e-07	0.55017	PDIA3	0.000130681	0.540073	SLC2A1	0.0121826	0.848491	FKBP9	0.0450419	0.664128	ELOVL5	0.00509966	0.834418	TSPAN6	0.207776	0.576626
60	CDK1	2.46867e-07	0.48556	PLIN4	0.000181086	0.723719	CANX	0.0130079	0.484522	ATP6V0C	0.0461706	0.259445	FIBIN	0.00521471	1.72945	PLS3	0.208013	0.311333
61	UBE2G1	2.91308e-07	0.654957	TIMM13	0.000204544	0.431735	TSPAN13	0.014538	0.729802	CMTM8	0.0468253	0.527506	GATA6	0.00608667	3.38104	TTC9	0.209703	3.0646
62	ADSS	2.93593e-07	0.753399	P4HB	0.000209808	0.353109	AMY1A	0.0188139	0.853075	SGPL1	0.0507918	0.475359	FOXA1	0.00611856	3.75268	UTP20	0.218091	1.36726
63	TPT1	3.09564e-07	0.289651	RBM24	0.000228699	0.465519	RFC3	0.0203561	0.46255	RTN4	0.052136	0.229241	EIF3E	0.00695904	0.545724	EIF3K	0.221228	0.200713
64	ARHGDIA	4.1146e-07	0.615207	CCDC88C	0.00024461	1.30787	SSBP2	0.0204959	1.15408	GXYLT1	0.0581366	1.07854	ARHGDIA	0.00723959	0.528288	GBX2	0.226812	0.431414
65	CALM1	4.41735e-07	0.625181	FN1	0.000264951	0.455832	AIG1	0.0218711	0.754181	TPP1	0.0599022	0.766098	CMIP	0.00749182	1.6792	APP	0.227631	0.970212
66	MYL12A	5.01225e-07	0.522177	SRPRA	0.000266215	0.692133	ID1	0.0224818	0.319675	IGFBP2	0.0606769	0.496949	PTBP1	0.00760919	0.434634	ACVR2A	0.227947	0.65008
67	NAP1L1	5.6363e-07	0.377026	PMVK	0.000309113	0.971091	GXYLT2	0.0226699	0.814387	CSNK2A1	0.0634942	0.249458	HSPE1	0.00762164	0.396639	FBXW7	0.229149	0.873132
68	ATP5MC3	7.22228e-07	0.403277	ATP5F1B	0.000437272	0.224328	SELENOK	0.0253265	0.539814	NUCKS1	0.063567	0.216224	ENO1	0.00766223	0.301822	RFXAP	0.231057	0.414746
69	VIM	8.59165e-07	0.794408	HMGB2	0.000507428	0.266515	HSPA8	0.0266678	0.164734	SNRPN	0.0656587	0.224272	SMARCA5	0.00787291	0.52742	PRKAR1A	0.231759	0.284292
70	RPL35	8.93807e-07	0.399707	DKK3	0.000558439	0.947609	HM13	0.0272039	0.344818	GAD1	0.0656919	2.22049	RPL37	0.00797613	0.338471	PPP1R3E	0.233233	0.574946
71	SET	1.22825e-06	0.40287	AMN1	0.000558602	2.08183	ARL6IP1	0.0277706	0.650042	SCAF11	0.069846	0.342153	AIF1L	0.00849	2.33334	STOX2	0.238279	0.999828
72	BTF3L4	1.32808e-06	0.464298	NDUFB10	0.000583271	0.396689	LAPTM4A	0.0281069	0.464783	HSP90B1	0.0706986	0.333074	SIKE1	0.00852265	0.660707	ARL8B	0.238703	0.674495
73	PAICS	1.60008e-06	0.673326	LEF1	0.000705016	1.16446	ATP1B3	0.0292511	0.529887	XPO7	0.0709729	0.477515	ABCE1	0.00859175	0.540607	ADGRL2	0.243932	0.429287
74	CTH	1.97191e-06	0.649131	POMC	0.000745191	1.62094	SEC11A	0.0302154	0.418952	NDC1	0.0732078	0.538735	G3BP1	0.00863171	0.532023	TMEM131	0.244263	0.492975
75	H3F3B	2.73587e-06	0.346608	CTBP2	0.000973337	1.22423	LARP7	0.0308455	0.197367	TMEM57	0.0743328	0.659445	H3F3B	0.00923656	0.322911	VCAN	0.245492	0.717111
76	THOC7	3.81365e-06	0.699473	LZTS1	0.00101419	1.39408	PGM1	0.0312135	0.391263	XPO1	0.0743512	0.297068	CDX4	0.00927547	1.09368	SUDS3	0.245626	0.497097
77	YWHAH	4.28334e-06	0.588419	MDK	0.00105574	0.266557	CCND1	0.031227	0.327401	PALD1	0.0769371	0.233284	NUTF2	0.00944956	0.426425	DCBLD2	0.246993	0.643777
78	POLR2E	4.46013e-06	0.600747	NDUFA1	0.0010879	0.560848	SEC61A1	0.0319506	0.456808	ID4	0.0794598	0.575904	ADSS	0.00957297	0.733807	RYK	0.248366	0.641957
79	HDAC2	4.55872e-06	0.565608	PDS5B	0.00109718	0.844201	CD276	0.0332098	0.683157	UQCRQ	0.0817803	0.240677	CSDE1	0.00966309	0.534395	NAPA	0.250014	0.565487
80	CTPS1	5.32726e-06	0.73461	DLL1	0.00117188	0.574576	RPN2	0.0333342	0.404031	HIF1A	0.0839114	0.477833	ACTG1	0.00967079	0.397636	TPI1	0.250014	0.145073
81	SALL4	5.35674e-06	0.490956	ATP6V0D1	0.00119119	0.776486	RTN4	0.0339545	0.222403	CTSD	0.0925262	0.446357	SRSF6	0.0103011	0.411968	SLC9A3R2	0.251264	2.08617
82	UMPS	5.44813e-06	0.903791	GLG1	0.00126355	0.872397	USP22	0.0339653	0.45908	SPTBN1	0.0935306	0.830317	FOXA2	0.011249	2.29292	PRTG	0.252722	0.257268
83	SRSF6	5.74607e-06	0.415943	ROCK1	0.00127369	0.823488	ARL8BL	0.0342811	0.569326	CLNS1A	0.0947005	0.399816	SRSF5A	0.0115546	0.532826	TUBA1A	0.260132	0.288883
84	GCLM	6.72655e-06	0.633876	GNAI3	0.00149144	0.352927	POFUT1	0.0356107	0.703931	ZNF326	0.0975904	0.290232	RANBP1	0.011741	0.409513	KRT7	0.264314	0.471959
85	DDX5	6.94933e-06	0.369733	MANF	0.00156828	0.67343	ATP2B1	0.0368792	0.369208	MPZL3	0.097774	0.509746	DDT	0.0121691	1.01024	PRADC1	0.266951	1.41663
86	DYL1	7.38802e-06	0.41621	UBE2C	0.00158687	0.340749	TXN	0.0371282	0.199865	TAF3	0.100691	0.426107	EIF3B	0.0125768	0.411096	MAD1L1	0.272995	0.79565
87	ABCE1	8.04865e-06	0.473869	SETD6	0.00162312	0.720207	MRPS30	0.0376421	0.619646	ASPM	0.101352	0.524425	NDUFA10	0.0128173	0.488047	GCHFR	0.273353	0.807824
88	FAM49B	8.39296e-06	1.05333	PDIA6	0.00168471	0.397069	CDH11	0.0429682	0.636121	CEBPZ	0.102241	0.480446	ARHGAP11A	0.0130468	0.935353	DHODH	0.275871	0.45777
89	EIF5	8.58272e-06	0.48652	SERBP1	0.00170089	0.204181	HSD17B12	0.0437512	0.404791	GFM1	0.103197	0.488361	CNDP2	0.0137019	0.658714	OTX1	0.279641	3.85646
90	SEC61B	9.43761e-06	0.465206	NDUFB5	0.00175998	0.296428	NDUFA9	0.0457848	0.438699	TRAP1	0.103967	0.615027	DMD	0.0141654	1.03622	NBL1	0.288437	1.059
91	RPL37	1.0228e-05	0.256973	GPC4	0.00184277	0.73425	NSG1	0.0473678	0.444743	LHX4-AS1	0.104632	0.891338	RRAS2	0.0144904	0.884134	ERP29	0.289442	0.268566
92	GPX4	1.08431e-05	0.451001	LAMB1	0.00184524	0.415049	VMP1	0.0475695	0.89342	HAS2	0.108544	0.576418	SALL4	0.0148698	0.445397	H3F3C	0.292022	0.153673
93	GDI2	1.11905e-05	0.453803	C1H12ORF57	0.00216051	0.476109	ITM2A	0.0477574	0.405843	PKM	0.108569	0.122633	PSMD13	0.0150399	0.577352	COMMD4	0.293374	0.600044
94	RRM1	1.2009e-05	0.631733	FAM133B	0.00233678	0.409628	FRZB	0.0479653	0.601815	MRPS5	0.109811	0.380895	MYL12A	0.0152175	0.473614	CEBPZ	0.294956	0.386667
95	XPO5	1.2985e-05	0.571658	SLC11A2	0.00252152	0.929688	MPZL3	0.0482226	0.448887	LFNG	0.110252	0.663289	SUMO2	0.0152319	0.357058	OSGEPL1	0.302034	1.818
96	VDAC2	1.33859e-05	0.362215	TMEM131	0.00252317	0.692081	POLR1E	0.0484957	0.488637	SS18L1	0.111241	0.735423	ACTB	0.0159706	0.246926	PTPRA	0.30635	0.608904
97	EIF1AY	1.45627e-05	0.533675	KDR	0.00284903	2.92156	FASN	0.0491843	0.277013	SDC3	0.11306	1.15643	TNFSF10	0.017374	0.878729	SMYD2	0.306427	1.03485
98	PDCD4	1.4681e-05	0.546652	NPY	0.00296922	3.11307	FN1	0.050177	0.283598	NOTCH1	0.114407	0.40028	CDC42	0.0176608	0.432158	ADD3	0.306466	0.158988
99	PSMA3	1.48315e-05	0.489476	ADGRL2	0.00330426	0.567068	SEC62	0.051448	0.683291	SPARC	0.11553	0.323201	RLIM	0.0184061	0.972921	WDR44	0.320458	0.871595

## Sheet: Chick_6Somite (Figure 3B)
Rank	postPS	pvals	log2foldchanges	NMP	pvals	log2foldchanges	LP	pvals	log2foldchanges	Neural	pvals	log2foldchanges	PSM	pvals	log2foldchanges	Endo/Ecto	pvals	log2foldchanges	Notochord	pvals	log2foldchanges			postPS							NMP								LP
0	JAM3	3.1882e-17	1.59014	TBXT	3.38818e-21	1.34769	JAM3	6.09697e-05	0.77546	CALM2	1.13262e-06	0.728795	PTN	4.32612e-34	2.99635	KRT7	1.00804e-27	4.77482	CHRD	5.87796e-20	7.62363
1	AKAP12	8.68691e-16	1.04178	CDH2	2.35426e-16	0.938614	SEPT9	0.000407055	0.685176	SET	4.57114e-06	0.581474	ALDH1A2	4.31538e-19	3.57853	KRT18	1.00081e-20	3.0588	TBXT	9.57401e-13	2.78624
2	P4HB	2.36622e-11	0.726659	APLP2	4.8188e-10	0.95628	KRT19	0.00219828	0.666686	SRSF1	2.80399e-05	0.533799	RNH1	1.99239e-12	1.83432	EIF4A2	6.37231e-15	1.68867	NOTO	5.06683e-10	5.29241		postPS							postPS								postPS
3	MSX1	2.45299e-07	0.706491	CLDN1	6.4227e-10	1.39989	RHOU	0.00256815	1.12474	RPS2	0.000143677	0.42015	FGF18	2.38986e-11	2.05544	KRT19	5.80839e-14	2.23253	LTF	1.63469e-06	5.84674		NMP							NMP								NMP
4	NUCKS1	8.375e-06	0.411931	HOXA7	2.57982e-09	0.87114	PITX2	0.00353541	2.04355	HSP90AA1	0.000159555	0.459196	MSGN1	3.76721e-09	1.76613	CALM2	3.06333e-11	1.51593	NOV	5.52495e-06	6.43164		LP							LP								LP
5	FN1	2.62242e-05	0.605314	DLL1	3.06668e-09	1.80919	JCAD	0.00356551	1.35188	FABP5	0.000275693	1.70342	MEOX1	1.13195e-07	4.60702	PABPC1	1.04415e-09	1.04131	ERGIC2	1.99594e-05	2.45472		Neural							Neural								Neural
6	TUBA1C	3.80172e-05	0.529889	HES5	1.17818e-08	2.20849	KRT18	0.0170764	0.665084	EIF4G2	0.000585614	0.362738	SMOC1	4.53582e-07	1.95654	TMSB15B	8.72479e-09	0.850684	H3F3B	4.97106e-05	1.09866		PSM							PSM								PSM
7	EEF1D	6.5777e-05	0.310749	WLS	2.3979e-08	0.898904	FIBIN	0.019587	1.17161	SNRPD1	0.000598501	0.472159	DCBLD2	9.39117e-07	1.76693	HSP90AA1	1.37096e-08	0.870055	CA10	7.99835e-05	6.48985		Endo/Ecto							Endo/Ecto								Endo/Ecto
8	CFC1	0.000114232	1.42513	NKAIN4	3.72792e-08	2.00816	MSX1	0.0204372	0.385053	PABPC1	0.00117547	0.399799	TCF15	4.18124e-06	3.62031	YWHAQ	2.90749e-08	0.985469	HSPA5	0.000128246	1.4545		Notochord							Notochord								Notochord
9	LDHB	0.00012999	0.243645	CHST15	3.0759e-07	1.21576	FARP1	0.0340167	0.437381	PCNA	0.00121626	0.470449	DLL1	5.44166e-06	1.54086	CIRBP	3.91785e-08	0.840538	SMOC1	0.000145123	2.57934
10	MSX2	0.000442977	1.20443	NPM3	1.45897e-05	0.377217	FN1	0.0608189	0.312467	PRELID1	0.00136575	0.573549	NOTCH1	8.12163e-06	1.29784	LASP1	4.27078e-08	1.9148	CDH2	0.000324226	1.1473
11	CDH2	0.000510504	0.35308	LMO4	5.37038e-05	0.797687	MSMO1	0.0626227	0.732698	ARPP19	0.00148232	0.537248	LRIG3	9.834e-06	1.86574	MYL9	8.26257e-08	2.17102	APLP2	0.000376055	1.36598
12	ID2	0.000787028	0.631076	HOXA4	0.000108395	1.39636	METRNL	0.0626424	1.40278	HSPE1	0.00231096	0.437203	PPFIBP1	4.36125e-05	0.793473	RANBP1	1.15424e-07	1.09031	SPARC	0.00107761	2.03211
13	EEF2	0.00128882	0.195828	NME2	0.000163163	0.23202	HOXB5	0.0694909	0.797426	GNL3	0.00247508	0.757632	FGFR1	6.61485e-05	1.0176	GPX1	1.21205e-07	2.13967	STRA6	0.00155715	2.17572
14	RBBP6	0.00180834	0.460105	PRTG	0.000260375	0.34611	SMAD6	0.0786787	0.876156	ANP32E	0.00360532	0.662034	Meis2a.2	0.000324385	1.3803	PAICS	1.7482e-07	1.658	CTNNB1	0.00155817	1.13262
15	FAU	0.00447359	0.211752	NOTCH1	0.00048069	0.878895	TIMM8A	0.0868898	0.252086	SLC25A5	0.00373283	0.518703	NUCKS1	0.000328383	0.403884	RPS2	1.96088e-07	0.838657	ACTG1	0.00256664	0.622975
16	CLEC19A	0.00647516	0.569054	TUBA1A	0.000579591	0.427227	GFM1	0.0871338	0.657192	CIRBP	0.00460989	0.329248	PRTG	0.000398604	0.429418	NDRG1	6.64742e-07	4.95443	PUM1	0.00302437	1.30561			Neural							PSM								Endo/Ecto
17	MFGE8	0.00730574	0.735718	FGF18	0.000597094	1.10256	MAD1L1	0.0909276	0.583416	PCBP2	0.00471705	0.454536	APLP2	0.000434344	0.629174	RPS15A	1.03436e-06	0.761231	HES4	0.00421319	2.53651
18	BAMBI	0.00825494	0.763804	FGF19	0.000806783	1.62049	MRPS22	0.0913142	1.2295	UCH-L1	0.00539475	0.739187	CDH2	0.000501989	0.500257	PLPP1	1.36185e-06	2.13884	NOTCH1	0.0045544	1.40811
19	PSMB7	0.0123133	0.360309	NASP	0.000863185	0.373827	BAMBI	0.0925089	0.588402	CLDN1	0.0054472	0.70858	OLFM1	0.00111031	2.11446	HSPE1	1.58862e-06	0.93472	RPL26L1	0.00498843	0.538944		postPS							postPS								postPS
20	KDR	0.0128208	2.19935	APCDD1	0.000932412	0.949498	TAF12	0.098147	0.734723	OAT	0.00847649	1.05309	EIF5B	0.00243771	0.480155	ATP5MC3	1.74824e-06	1.01278	HYOU1	0.00532235	1.98321		NMP							NMP								NMP
21	SMAD6	0.0159187	1.06283	YBX1	0.0022187	0.163119	HAPLN1	0.0984019	0.83896	KPNA2	0.00860349	0.731953	TMEM100	0.0038308	2.84673	EIF5	2.27192e-06	1.0169	TCF15	0.00743694	3.21886		LP							LP								LP
22	GATA5	0.0166877	1.19885	PARP1	0.00224307	0.368719	PHLDA2	0.0992412	1.23744	ATP5MC3	0.0100455	0.731953	STRA6	0.00608955	0.998429	RAN	3.52044e-06	0.682561	FSTL1	0.0081291	2.26981		Neural							Neural								Neural
23	ANP32B	0.0184629	0.19372	LFNG	0.00262999	1.26339	LMO2	0.101939	2.42093	SUMO2	0.0130975	0.731953	CADM1	0.00657509	1.11119	TRA2B	4.78918e-06	1.05151	angiopoietin-2	0.00862689	4.70561		PSM							PSM								PSM
24	SDC3	0.0206253	0.543713	WNT8A	0.00272356	1.02555	MRPL21	0.106933	0.6658	FABP7	0.0149964	0.731953	STMN1	0.00862437	0.309458	CSRP2	5.71773e-06	5.29935	NDUFA4	0.00871	0.818311		Endo/Ecto							Endo/Ecto								Endo/Ecto
25	NIP7	0.0206321	0.441507	AKAP12	0.00300674	0.37871	REXO4	0.112355	0.758146	EIF4A2	0.0163341	0.731953	CYB5R3	0.00884776	1.21121	BASP1	7.59736e-06	1.2717	HNRNPA1	0.00963488	0.568317		Notochord							Notochord								Notochord
26	IMPDH2	0.021	0.301834	DRAXIN	0.00335717	1.63904	TUBA1C	0.11982	0.22176	GPI	0.0172807	0.731953	SP5	0.0101439	0.571538	DDX5	2.34726e-05	0.732432	GJA1	0.0128035	1.13988
27	FIBIN	0.021671	1.39324	PALD1	0.00520234	0.338673	LDHB	0.120118	0.127577	HOXB7	0.0176579	0.731953	DNMT3A	0.0114406	0.53461	ZNF593	2.88937e-05	1.14578	RPL35	0.012845	0.598759
28	ATP5PB	0.0216888	0.213664	ILF2	0.00530041	0.299029	ID2	0.120534	0.286829	POLR2E	0.0181134	0.731953	MEX3A	0.0145483	0.533689	ENO1	3.11519e-05	0.594686	TMSB15B	0.0135264	0.603049
29	RASGRP3	0.0247241	0.905562	SALL1	0.00565473	0.573389	CDCA9	0.124342	1.358	HELLS	0.0181696	0.731953	CLTB	0.0174695	0.693614	ST13	3.14488e-05	1.17037	HNRNPA2B1	0.0136576	0.736513
30	WNT5A	0.0253293	0.418962	STMN1	0.00587359	0.23854	LAMB1	0.126661	0.32195	CAND1	0.0210726	0.731953	BRD2	0.0239641	0.563617	BTF3L4	3.41235e-05	0.954819	DDX3X	0.0139011	0.894911
31	MIF	0.0264216	0.18861	HDGF	0.00653185	0.244473	NIP7	0.130317	0.274842	HES5	0.021885	0.731953	GNAI3	0.0264898	0.478377	TUBB2B	3.52832e-05	1.18751	PDIA3	0.0161097	1.0736
32	CDCA3	0.0282503	0.431292	GJA1	0.0067157	0.46992	COMMD3	0.133766	0.527244	RPL27	0.0223801	0.731953	TMEM35B	0.0302543	0.996622	CAPZA2	3.70569e-05	1.51458	SEC61B	0.0176991	0.950716
33	TUBA1A	0.0299176	0.279118	TMED2	0.0091391	0.538746	APOO	0.134308	0.634328	CBX3	0.0227703	0.731953	UBE2H	0.0321183	0.916889	DYL1	3.92511e-05	0.879631	SDHC	0.0179396	1.90743			Notochord
34	TUBA1B	0.0329714	0.124002	PRRC2C	0.00918794	0.321879	ABCF2	0.13856	0.327318	TOMM20	0.0227886	0.731953	LBX2	0.0376839	2.50251	RPS16	4.11652e-05	0.553985	POSTN	0.0231914	4.03576
35	CDC42EP4	0.0341769	0.994335	NT5DC2	0.0103625	0.490667	HMGCS1	0.141175	0.917665	TAF15	0.0229492	0.731953	ZNF503	0.0378849	1.14668	PDGFA	4.3708e-05	1.98717	SLC16A1	0.0235784	0.784567		postPS
36	CORO1C	0.038434	0.381639	TUBA1B	0.0120137	0.145206	PKM	0.145304	0.115157	G3BP1	0.0240725	0.731953	PDIA3	0.042742	0.427063	SEC31A	4.38781e-05	1.145	PDCD4	0.0246872	1.35885		NMP
37	DDX51	0.0393529	0.192128	HOXB7	0.0124227	0.780056	OSTC	0.146558	0.483419	PLPP1	0.0241975	0.731953	MMD	0.0441398	0.756437	SRSF1	4.93424e-05	0.758295	RPL29	0.0280956	0.612976		LP
38	SERBP1	0.0408705	0.148647	PDIA6	0.0129305	0.478727	RPL35	0.154019	0.108817	UBE2D3	0.0263431	0.731953	LEF1	0.0470253	0.836522	ID3	5.01876e-05	1.7616	CNOT11	0.0283025	1.6771		Neural
39	PMVK	0.0411354	0.621677	TMEM64	0.0131541	2.12618	LASP1	0.17373	0.333817	CDK1	0.0265722	0.731953	MID1	0.0603604	1.0864	LGALS3	5.08109e-05	4.589	CTH	0.0316424	1.28719		PSM
40	LAMB1	0.0414702	0.385381	RAB6A	0.0145052	0.403901	GATA2	0.174525	0.5125	SIKE1	0.0274682	0.731953	GBX2	0.0618872	1.72369	SNU13	5.63483e-05	0.785341	COL4A1	0.0326768	3.18998		Endo/Ecto
41	WDR3	0.0421465	0.408804	CCT6A	0.0192127	0.251085	HYPK	0.182776	0.298597	SRSF6	0.0275382	0.731953	DDX46	0.0640135	0.473672	SUMO2	5.84146e-05	0.980393	PPIB	0.0327708	0.722568		Notochord
42	UNC5B	0.043314	1.24165	ADD3	0.0218827	0.348128	PSMB4	0.185235	0.156939	RPL29	0.0278632	0.731953	MBNL3	0.0642597	0.793301	DCAF13	6.6e-05	1.34892	SST	0.0339658	6.19641
43	PARP1	0.0447335	0.202512	PSIP1	0.0237448	0.902713	GATA5	0.187182	0.72682	RBBP4	0.0291965	0.731953	RPN2	0.0656504	0.607935	YWHAE	6.81146e-05	0.708707	BAK1	0.0369519	2.39311
44	MDK	0.0452533	0.20664	CHD7	0.0242401	0.430971	ABRAXAS2	0.206519	0.166939	SAP18	0.0293215	0.731953	RSPO3	0.068341	1.19379	PAFAH1B2	7.08012e-05	1.42108	UBE2V2	0.0369867	1.29757
45	SALL4	0.0481968	0.312096	ATP5ME	0.026436	0.342325	ACOT7	0.207899	0.55444	DUT	0.0293955	0.731953	NDUFS3	0.0683646	0.625359	NCL	7.47932e-05	0.527244	NUCB2	0.0371785	1.77007
46	COX7C	0.0491652	0.200387	F2RL1	0.0264703	1.03136	SQLE	0.211694	0.589375	TRIB2	0.0321393	0.731953	PHF20L1	0.0691585	0.543464	GPX4	7.48215e-05	0.929732	YTHDC1	0.0391253	1.44808
47	TMED7	0.0493449	0.38507	WNT5B	0.0345011	0.560252	CDH11	0.212663	1.30765	C1QBP	0.0331688	0.731953	LTA4H	0.0704179	0.580471	PRDX1	7.58455e-05	0.758588	Wpkci-7	0.0392533	0.600123
48	HAPLN1	0.0510248	1.00034	COX4I2	0.0374869	0.276155	MT4L	0.215229	0.495743	HOXA7	0.0354396	0.731953	TMSB4X	0.071146	0.270091	EPCAM	7.74939e-05	1.87196	LRIG3	0.0410629	1.73166
49	UBA52	0.0535803	0.120234	CKAP2	0.0381262	0.444111	EIF3A	0.227026	0.300811	DNMT3A	0.0384473	0.731953	SELENOT	0.0728813	0.800827	VPS26A	7.79627e-05	1.58871	TFG	0.0428244	0.965222
50	SS18L1	0.0557694	0.337954	NUDT1	0.0385437	0.564174	CFC1	0.234174	0.379876	PTGES3	0.0391776	0.731953	CENPX	0.0800914	0.630763	IGFBP2	8.33932e-05	2.47651	PCBP2	0.0435186	0.651241
51	HOXB5	0.0570824	0.707887	ATP2B1	0.0403263	0.446254	CD24	0.241732	0.25728	RPL37	0.0393894	0.731953	DGCR6	0.082057	0.924647	UQCR10	9.25067e-05	0.976112	HSP90B1	0.0441213	1.23635
52	ALDOC	0.0600907	0.185559	TAF3	0.0407766	0.460301	EGLN1	0.242433	0.402286	NSA2	0.0446346	0.731953	H2AFZ	0.0845512	0.21347	ATP6V1G1	9.33739e-05	0.952742	CTSV	0.0449153	1.82158
53	TMEM57	0.0639408	0.560238	NUDT16L1	0.0416898	0.206093	ACTR3	0.248403	0.258494	MRPL14	0.0449284	0.731953	MAPRE1	0.0930384	0.302565	SRSF6	9.63085e-05	0.845218	ATP5F1B	0.0456588	0.460173
54	PALD1	0.0651112	0.205929	KDELR2	0.041772	0.503378	TAL1	0.250119	2.77539	RBM24	0.045117	0.731953	ADGRL2	0.0949938	0.882925	PPP2CA	9.68481e-05	1.1117	EEF1A1	0.0458463	0.297643
55	HYPK	0.0659685	0.346802	SLC16A1	0.0432352	0.375774	SVIL	0.254562	1.05703	ALYREF	0.0455457	0.731953	GDF3	0.0952097	1.7583	SOX17	0.000100743	5.52468	SEMA3D	0.0481691	3.7815
56	SLC39A3	0.0689283	0.428273	TFDP2	0.0458249	0.309483	CLEC19A	0.254707	0.184178	MYL12A	0.0464473	0.731953	RAMAC	0.101269	0.84731	HSP90AB1	0.000103973	0.661809	TBC1D8	0.0485621	3.70527
57	HSPA5	0.0695389	0.1776	FUBP1	0.0465269	0.291795	SUPT4H1	0.273368	0.289098	PSMD12	0.0464725	0.731953	ZEB2	0.103427	0.992113	G3BP1	0.000105175	1.24952	FGFR1	0.0515036	1.06931
58	SSB	0.0706085	0.300695	GLG1	0.0498507	0.612624	TGFBI	0.276398	2.54709	YWHAE	0.0474066	0.731953	ADD3	0.103972	0.335242	ARF1	0.000110891	0.913114	SAP130	0.0519424	1.20003
59	SKAP2	0.0709582	0.242183	XPA	0.0502188	0.516283	DHCR24	0.2784	0.579701	NDUFA6	0.051293	0.731953	MYL6	0.104536	0.336776	UBL5	0.000111014	0.999419	ZMPSTE24	0.0528293	1.73382
60	ARID3A	0.0710946	0.257166	ATP5F1D	0.0504557	0.349889	EGFL7	0.281312	0.958693	TUBB4B	0.054618	0.731953	PHF14	0.106176	0.578213	DDX3X	0.000121999	0.925683	ADGRL2	0.0533722	1.19353
61	CCND3	0.0716915	0.940426	PCNA	0.0536204	0.265408	FAHD1	0.282277	1.34915	CA2	0.0555402	0.731953	SNRPB2	0.107955	0.365335	ACTR3	0.000123396	1.11177	NUS1	0.0534671	1.14733
62	MESP1	0.083732	1.00276	ACTG1	0.056418	0.16154	SMDT1	0.283119	0.381948	RPA3	0.0557361	0.731953	NDUFS6	0.111339	0.898856	TRARG1	0.000129328	1.95282	SLC25A6	0.0535622	0.467797
63	PGLS	0.0845261	0.260409	SDC3	0.058972	0.690854	INPP5A	0.28484	0.522111	ADSS	0.0574841	0.731953	ATP2A2	0.111724	0.739042	HNRNPA3	0.000133025	0.648602	PRDX6	0.053872	0.892147
64	TIMM13	0.0865322	0.267041	TM7SF2	0.0604482	0.500584	RAB2A	0.287829	0.320763	PNRC1	0.0623768	0.731953	SNRPF	0.113576	0.505982	SRSF2	0.000133513	0.718978	PDIA4	0.0557874	1.14825
65	TRAF3IP1	0.0871058	0.630278	HOXB8	0.0606295	0.789684	CCT8	0.292751	0.130005	UBQLN4	0.0670243	0.731953	HMGB1	0.11878	0.172089	PSMC3	0.000137724	1.233	SLC29A1	0.0603376	2.31305
66	SMAD2Z	0.094121	0.756354	ID3	0.0621046	0.499293	TBCA	0.294319	0.2553	PPIA	0.0686976	0.731953	RBM17	0.123847	0.563739	RPL29	0.000138076	0.576844	H3F3C	0.0646335	0.500896
67	NOP58	0.0942926	0.184893	SFPQ	0.0623961	0.246955	HPDL	0.297762	1.52274	VDAC2	0.0688843	0.731953	CLEC19A	0.131352	0.370538	DMD	0.000152719	2.298	WLS	0.0671464	0.822051
68	THOC1	0.10634	0.445431	SMARCE1	0.0643683	0.208792	RTFDC1	0.299997	0.350022	PDGFA	0.0707148	0.731953	JPT2	0.132009	0.404287	CAPRIN1	0.000153274	1.20354	GLCCI1	0.0678954	1.31604
69	EIF3J	0.110965	0.205566	MESP1	0.0653552	1.20296	ELOVL5	0.313137	0.296923	H3F3C	0.0711576	0.731953	MPP6	0.133272	0.612031	ARHGDIA	0.000171947	1.13451	LTA4H	0.0680693	1.27849
70	LONP1	0.111847	0.367352	FGFR1	0.0686778	0.436816	RRS1	0.316052	0.208127	IGF2BP3	0.0716269	0.731953	SF3B5	0.13495	0.3014	METAP2	0.00021828	1.09401	HERPUD2	0.0681563	1.61289
71	RPL26L1	0.11579	0.0873512	ACTR1A	0.0695636	0.30254	IDH2	0.317162	0.341306	TRIM71	0.0746452	0.731953	HMGB3	0.139455	0.176851	HSPD1	0.000220696	0.556812	HSP90AB1	0.0688561	0.641123
72	MED27	0.11711	0.93013	VAPB	0.0703708	0.516887	NUFIP1	0.319729	0.358301	SAV1	0.0753844	0.731953	PDPK1	0.139914	0.565874	RGN	0.000222583	2.19852	MAGOHB	0.0691494	0.865116
73	RORA	0.117956	1.00172	PREPL	0.070449	0.233411	COQ7	0.32316	0.621341	RANBP1	0.0775219	0.731953	GMNN	0.140374	0.792229	DKC1	0.000227529	0.831545	IGF2BP3	0.0691494	0.520894
74	HOXA9	0.118264	1.23078	DPYSL3	0.0728186	0.376752	ROMO1	0.325347	0.176121	TNNC1	0.0812875	0.731953	NTM	0.141276	1.14352	SRSF5A	0.000234892	1.11063	FBXW5	0.0701543	1.99106
75	BRT-1	0.118455	0.41872	SS18L1	0.075284	0.331458	CANX	0.33468	0.268411	ENO1	0.0818508	0.731953	NSMCE3	0.143137	0.714199	VDAC2	0.00024688	0.740579	YWHAE	0.0714423	0.512256
76	GATA2	0.119147	0.651476	PPIG	0.0755425	0.260062	GATA4	0.335972	1.25483	CCNB2	0.0829462	0.731953	NEBL	0.143754	1.84678	PTBP1	0.000259256	0.934334	TCF12	0.0730258	0.587833
77	CCDC59	0.122958	0.612119	EPHA1	0.07713	1.31356	PPP1R8	0.340361	0.303977	VAPA	0.0833276	0.731953	PRCP	0.145705	1.50995	TOMM22	0.000267578	0.893035	CTXN2	0.074857	5.49018
78	ATP1B1	0.123215	0.339604	PKM	0.0781998	0.169612	EIF3K	0.343189	0.11279	METAP2	0.0834778	0.731953	ANXA5	0.145726	1.17726	PTGES3	0.000268612	0.910721	SDC3	0.0767896	1.12977
79	PIN4	0.128561	0.441682	NUCB2	0.0782318	0.693664	MYH9	0.345854	0.261034	CAPRIN1	0.0854646	0.731953	SMARCA5	0.149052	0.253941	HNRNPH3	0.000274607	0.636089	WIF1	0.0778196	4.68546
80	AP1S2	0.128875	0.696063	UBE2N	0.0784771	0.361358	CDC42BPA	0.349213	0.724474	EIF3L	0.0855621	0.731953	ILF2	0.15268	0.21086	SUMO3	0.000279161	0.669434	EIF3F	0.0811779	0.864226
81	AURKAIP1	0.130657	0.300986	GAD1	0.0793463	1.7153	ETS1	0.349213	1.62599	RPRD1B	0.0857854	0.731953	NARS	0.155174	0.411565	PRELID1	0.000279454	0.975989	VDAC2	0.081312	0.556763
82	NDUFS8	0.131372	0.354599	ANP32B	0.080867	0.199206	PCMT1	0.349285	0.40662	ERH	0.0875178	0.731953	BLCAP	0.158111	0.348816	ABCE1	0.00029407	0.95973	FOXA1	0.0816479	4.5292
83	C19orf70	0.131484	0.401096	SCAF11	0.083968	0.277479	SCLT1	0.350074	1.83578	KDM3A	0.0875604	0.731953	RRAGC	0.163569	0.428407	HSPA8	0.000294686	0.501219	LAMB1	0.0825605	1.05293
84	TIA1	0.134766	0.347951	USP22	0.0867236	0.409416	MTRF1L	0.35621	1.15179	ARHGDIA	0.0878733	0.731953	POLR1E	0.165056	0.596567	EIF3I	0.000313946	0.787428	BTG1	0.0840655	1.34238
85	ANKRD17	0.136087	0.710257	SKAP2	0.0884164	0.186336	BRIX1	0.356355	0.237525	LSM8	0.0882586	0.731953	MTA1	0.167294	0.61351	CDC42	0.000318003	1.0869	PDIA6	0.0843415	0.94964
86	SMIM4	0.138676	0.458914	DPYSL2	0.0889353	0.452956	CCM2	0.35661	3.0982	NDUFB1	0.0889613	0.731953	POLR2M	0.168686	1.5101	EIF4G2	0.000326378	0.537073	OLFML3	0.0849652	4.25468
87	2021-09-09	0.140227	0.207547	ADGRL2	0.0895874	0.482581	FANCM	0.358392	0.948744	TMED2	0.0898569	0.731953	CCT2	0.169626	0.320963	NUTF2	0.000336351	0.795811	GEMIN8	0.0861184	2.30577
88	TGFB2	0.140411	0.885718	BDH1A	0.0952056	0.547053	DPCD	0.358975	0.383305	ODC1	0.09604	0.731953	YBX1	0.169844	0.114342	PSMA1	0.0003447	1.80572	LAPTM4A	0.0886422	1.01057
89	NUDT16L1	0.141403	0.124657	CENPF	0.0984453	0.532205	WDR55	0.363001	0.494665	WDR43	0.0964999	0.731953	FARSA	0.171666	0.598403	C1QBP	0.000345534	0.656967	RPS15A	0.092558	0.449722
90	EIF4H	0.14235	0.160304	COX7C	0.100488	0.205884	CDC42EP4	0.363222	0.408681	SF3A3	0.097363	0.731953	ETFA	0.173921	0.253583	H3F3B	0.000346728	0.697056	GLG1	0.0934926	1.29276
91	CIAPIN1	0.145718	0.359624	FAM133B	0.100527	0.27692	ALYREF	0.36484	0.103843	UQCRB	0.0979988	0.731953	AP2A2	0.174983	0.489463	C12orf66	0.000356544	0.452597	CXXC5	0.0937933	1.15149
92	PDIA3	0.146617	0.277213	WNT5A	0.10387	0.259856	NRDC	0.36724	0.277188	EIF4E	0.098763	0.731953	PRRC2C	0.175876	0.231624	ARL4C	0.00039942	1.35309	MFAP2	0.0945862	1.60202
93	ATP2B1	0.150556	0.228781	TRIM71	0.10481	0.332797	NDUFAB1	0.367536	0.125909	CCT4	0.0995635	0.731953	AKAP9	0.176423	0.78345	EIF3F	0.000417968	0.867069	CCDC47	0.0950418	2.18903
94	UBE2C	0.152923	0.213375	CTSD	0.106602	0.537981	FAM206A	0.367981	0.745112	CCND1	0.0998788	0.731953	SIK1	0.177721	1.43151	DYNLRB1	0.000442998	1.35275	ADAM10	0.0960348	1.3889
95	RACK1	0.160637	0.0577151	UCH-L1	0.108127	0.380093	SRSF3	0.368722	0.0632053	PSMB2	0.100686	0.731953	ARID4A	0.177946	0.922175	CCT5	0.000470693	0.51053	RACK1	0.0968429	0.272101
96	C12orf66	0.162166	0.113914	SYNE2	0.108792	0.678902	LRRFIP2	0.371995	0.763701	NUP88	0.101499	0.731953	CTBPL	0.178774	0.398029	UBB	0.000477098	0.868555	CLEC19A	0.099813	0.899265
97	EIF5A2	0.169898	0.124511	FGF8	0.112108	1.57063	C11H16ORF87	0.373862	1.36508	BLMH	0.10198	0.731953	GTF2B	0.179631	0.652407	EEF1B2	0.000495136	0.383096	FAM8A1	0.0999317	3.33879
98	RBM38	0.170092	0.53009	CD164	0.112122	0.495406	RCOR3	0.374049	0.155992	PSMA5	0.103611	0.731953	ZC3H11A	0.182703	0.920243	ADSS	0.000521809	1.23282	ATP5MC1	0.107179	0.570393
99	HDGF	0.173729	0.115979	GNAI3	0.115591	0.281708	TPX2	0.374798	0.121506	MARCKSL1	0.104247	0.731953	P4HA2	0.183112	1.69146	YWHAB	0.000529393	0.660311	MCAM	0.107473	2.06755

## Sheet: Chick_35Somite (Figure 3C)
Rank	LP	pvals	log2foldchanges	PSM	pvals	log2foldchanges	Neural	pvals	log2foldchanges	NMP	pvals	log2foldchanges	Somite	pvals	log2foldchanges	Ectoderm	pvals	log2foldchanges	LP2	pvals	log2foldchanges	Blood	pvals	log2foldchanges	Notochord	pvals	log2foldchanges				LP								PSM								Neural
0	ID2	4.40335e-45	1.78656	MSGN1	2.93837e-72	3.19665	HES5	8.4347e-118	5.19745	TBXT	1.51347e-115	3.88623	MEOX1	1.38401e-128	4.22026	FN1	1.17955e-64	4.26858	LIX1	1.20305e-30	7.02137	HBZ	2.7806e-109	13.9662	LTF	1.08812e-09	5.25411
1	MSX2	3.50713e-38	1.96413	FGF18	7.23958e-71	2.44258	GBX2	3.04093e-61	4.0509	RASGRP3	4.39251e-51	3.31886	TCF15	1.34711e-98	4.20979	PDGFA	2.49857e-54	4.58743	PRRX1	3.98562e-19	3.81845	HBBR	8.80711e-90	14.6277	MNX1	1.62197e-07	4.97588
2	TWIST1	2.72585e-28	2.06151	DLL1	1.49401e-41	2.31672	PMP22	1.26703e-50	3.51463	CD99	7.48556e-30	2.45435	SHISA2	6.59076e-76	3.85473	NREP	8.50924e-56	3.1075	ALDH1A2	4.39303e-12	3.88335	HBM	6.44706e-83	14.1515	S100A6	1.72079e-05	2.48834			LP								LP								LP
3	PRRX1	1.21713e-25	2.32678	PPFIBP1	8.0274e-28	1.39669	RHOB	1.46499e-39	2.31297	APCDD1	6.29824e-29	2.4829	NPY	2.67056e-54	5.63114	ANXA2	3.13183e-46	4.55862	KRT7	1.11063e-10	3.78872	HBE	9.48887e-84	14.2225	CHRD	0.00025367	6.49186			PSM								PSM								PSM
4	ID1	1.54845e-24	1.27478	TMEM100	1.96958e-21	2.0013	VIM	2.1436e-36	1.67983	WLS	3.59276e-28	1.45602	NBL1	5.40474e-44	2.48627	CXCL14	5.97767e-42	6.8071	KRT18	4.51689e-09	4.10171	HBA1	4.94178e-79	14.2215	TIMP3	0.000246928	2.52769			Neural								Neural								Neural
5	MDK	4.64827e-15	0.747922	RNH1	5.12458e-21	1.26583	COTL1	5.08486e-36	1.56629	METTL6	4.45098e-24	1.84258	SMOC1	1.17005e-37	2.27794	CLDN1	6.90901e-36	5.35597	Meis2a.2	2.98164e-09	2.2327	SLC4A1	4.88411e-37	9.98673	CRABP-I	0.000433338	4.30819			NMP								NMP								NMP
6	DLX5	1.437e-12	1.62426	HAPLN1	2.39233e-20	1.83489	PTN	1.82279e-28	2.16054	WNT5A	1.05102e-23	1.37546	NOTCH1	1.74325e-32	1.87845	S100A11	1.70926e-34	5.27956	ISL1	7.77588e-09	4.75764	TSPO2	4.02541e-35	7.40177	angiopoietin-2	0.00082171	2.67864			Somite								Somite								Somite
7	FIBIN	3.30316e-11	1.86853	CLEC19A	3.10852e-19	1.63663	MARCKSL1	5.93519e-28	1.37383	FGF19	4.04911e-20	3.79445	MPP6	1.82568e-31	2.30702	MDK	5.34699e-37	1.84126	HOXD13	2.27711e-08	2.71394	FTH1	2.46974e-39	3.47125	C9H2ORF82	0.00139256	4.40575			Ectoderm								Ectoderm								Ectoderm
8	MSX1	4.84665e-11	0.901957	CDH2	1.00748e-16	0.886212	SFRP2	1.32543e-25	2.35374	JARID2	9.93801e-20	1.52228	TMSB4X	2.80759e-30	1.10131	IRF6	1.17612e-32	4.88291	RDH10	2.7663e-08	3.04205	UROD	6.33425e-28	5.68423	SST	0.00484602	4.47011			LP2								LP2								LP2
9	BMP4	1.1456e-10	1.95147	LEF1	1.32137e-12	1.19471	GNG10	8.6055e-24	1.96519	CHST15	6.43071e-19	1.77027	RHOU	1.80221e-29	2.21842	KRT7	4.97019e-32	4.24579	BAMBI	3.47083e-08	2.19805	TFRC	5.493e-27	5.48394	TBXT	0.00472822	1.48879			Blood								Blood								Blood
10	COL1A1	3.63487e-10	1.97761	CADM1	3.2963e-12	1.34747	ALDOC	1.65221e-22	0.861613	TPST1	8.88831e-19	1.42348	DCBLD2	1.89169e-28	1.88162	TMSB15B	5.80902e-31	1.51712	FOXA1	1.40938e-07	5.51621	HDGF	9.9746e-25	2.20952	FOXA1	0.00711466	3.26486			Notochord								Notochord								Notochord
11	CACNG3	4.81862e-10	2.23355	NOTCH1	3.51834e-12	0.957971	ACVR2B	4.67806e-22	1.62104	HOXD12	4.02452e-18	1.26167	GPC4	2.0105e-27	2.01169	KRT19	1.80641e-26	2.87937	LGALS3	1.69818e-06	5.04466	TUBB1	8.21034e-20	7.27048	VTN	0.0073257	2.54562
12	CDH11	7.3366e-10	1.47938	DHX37	5.00997e-12	0.975694	APOH	7.5074e-21	4.72056	FGF18	8.8958e-18	1.39527	COLEC12	4.4417e-26	2.05673	TPM1	2.00919e-25	2.07804	KIFAP3	4.54135e-06	1.67335	HMBS	1.52961e-20	4.28565	SHH	0.0079678	5.20957
13	GAPDH	1.64861e-09	0.321516	MEOX1	2.01787e-11	1.08832	PAX6	7.58698e-18	4.59739	MSX1	2.5728e-17	1.31458	PTN	1.07471e-25	2.1146	PURH	2.10232e-24	1.85576	NR2F2	5.26359e-06	1.94215	PRDX3	3.10058e-22	2.88041	FOXA2	0.0111308	4.33403
14	MFAP2	1.02934e-08	0.940286	METTL6	2.36641e-11	1.13687	UCH-L1	7.72983e-16	1.69255	ENHO	1.08011e-16	1.90138	RNH1	1.66841e-25	1.6911	EPCAM	2.12384e-21	3.69388	GAPDH	6.50273e-06	0.64785	FECH	1.54923e-18	6.14642	MYCT1	0.0161404	7.03796
15	LIMD2	1.71729e-08	0.898973	ARHGDIB	2.91248e-11	0.958854	TUBB4B	1.15643e-15	0.83604	ARHGEF9	1.16375e-15	2.14493	FABP5	3.39545e-23	2.81624	WNT6	1.77275e-20	7.58445	TPD52	1.2144e-05	1.90007	PABPC1	6.92474e-22	2.38914	CD93	0.0165248	6.62279
16	EBF3	3.25967e-08	1.53686	PCP4	2.12853e-10	1.50645	FAM181A	4.86746e-15	5.37742	AKAP12	1.71481e-15	1.39088	CYP1B1	4.79857e-21	3.41782	PKD2	8.17323e-19	6.18374	COL1A1	1.75935e-05	2.70371	CCND3	2.26785e-17	4.97937	SPARC	0.0207949	1.10955
17	WNT5A	6.68891e-08	0.659128	LRIG3	3.00676e-10	1.18857	GLIPR2	3.58726e-15	1.63194	MKRN1	6.7961e-15	1.31326	POSTN	4.47421e-21	2.89498	GPX1	4.59351e-19	2.13368	VEGFD	2.07023e-05	4.69962	ABCB10	1.6977e-16	5.41106	NPY7R	0.0248027	8.21303
18	SDC3	7.95288e-07	0.818886	ACTN1	3.66948e-10	0.942141	WNT4	1.911e-14	4.12139	APBB1IP	7.1415e-14	4.226	PPFIBP1	1.172e-19	1.39101	MCAM	9.21972e-19	2.99954	CDK6	1.83159e-05	1.62995	RBM38	1.94203e-17	3.77332	POSTN	0.0246266	1.86714
19	C1orf216	9.19794e-07	1.96506	JCAD	6.06366e-10	1.43238	LMO4	3.03007e-14	1.07272	TESC	1.43136e-13	2.19309	LRIG3	5.80781e-19	1.93186	MPZL3	4.90158e-18	3.91659	ANXA1	2.9184e-05	6.82036	HBBA	9.17943e-16	11.0504	PLPPR1	0.0253184	2.80417
20	ATP6V1G3	2.16632e-06	2.78031	JARID2	8.33271e-10	0.956371	RASL11B	7.01467e-14	1.71937	HOXA7	1.56709e-12	1.26168	MMD	7.26626e-18	1.72541	DCN	3.62094e-18	3.34611	BZW2	2.79959e-05	1.06741	TAL1	4.6551e-15	7.60242	TMEM158	0.0271313	4.45146
21	SNAI1	2.94516e-06	1.56976	RSPO3	9.59417e-10	2.11201	FABP6	1.16624e-13	2.97569	FGF8	2.65113e-12	3.29053	LFNG	7.24425e-18	1.68738	CDH1	9.90319e-18	4.8625	MDK	3.7742e-05	0.991225	AK2	6.27141e-17	2.752	RAMP2	0.0280671	8.37742				NMP								Somite								Ectoderm
22	HOXD8	3.82401e-06	0.751012	SMOC1	1.59213e-09	0.924222	TUBA1B	1.06387e-13	0.428877	GULP1	1.9707e-11	1.77875	IGSF21	3.62604e-17	4.30717	COL17A1	1.96845e-17	6.03755	TCF21	7.65075e-05	5.30016	GPX1	3.48985e-16	3.07287	COL4A1	0.0273209	1.95501
23	ZNF423	7.14481e-06	0.629753	ENHO	1.88538e-09	1.31447	PODXL	1.39265e-13	1.85415	GREB1	6.01113e-11	1.31781	ANXA5	6.52518e-17	1.58867	DMD	2.20899e-17	2.27881	UNC5C	0.000382167	2.45298	TPCN2	1.01251e-12	11.2595	TMEM175	0.0336765	1.84017
24	OAF	8.46713e-06	0.786767	ANXA5	2.09453e-09	0.980427	ENO1	1.76972e-13	0.513471	VAV3	4.63389e-10	2.07593	GADD45B	1.26502e-16	2.1146	DLX5	5.0243e-17	2.62952	CLDN3	0.000490685	3.03174	MBNL1	3.79242e-12	4.50707	COL8A1	0.0355981	2.8312			LP								LP								LP
25	PRRX2	1.66758e-05	2.70479	SLC18B1	2.81105e-09	1.26584	PRTG	8.99366e-13	1.42139	LGALS8	5.85342e-10	1.56364	CDH20	9.47287e-16	3.89296	ESRP2	5.33943e-16	2.83481	EPCAM	0.000537886	2.1017	MGST3	7.87386e-13	2.70605	TAC1	0.0367702	6.00203			PSM								PSM								PSM
26	CXXC5	2.13353e-05	0.605663	C10H15ORF59	4.29855e-09	2.73533	MYLK	1.77991e-12	3.05477	C9orf3	7.67287e-10	2.39605	PAX7	8.27596e-16	2.57645	BTG1	3.68823e-16	1.59566	MMP2	0.000599508	2.14087	ARID3A	1.9922e-12	2.74892	FRMD3	0.0372535	3.15956			Neural								Neural								Neural
27	GREB1	2.457e-05	0.736287	COLEC12	8.31004e-09	0.993064	CTGF	2.25317e-12	1.86683	SCD	9.55297e-10	0.907293	TBX22	3.58521e-14	4.598	TFAP2A	1.56758e-15	4.80873	OLFML3	0.000691483	1.8985	SLC25A39	2.22908e-11	2.83049	TEX264	0.0391044	2.29208			NMP								NMP								NMP
28	FLI1	2.50878e-05	2.08878	GDF3	9.96248e-09	1.88469	HSP90AA1	2.50415e-12	0.700099	PDE6D	1.18715e-09	1.16494	RASD1	4.61163e-14	4.50203	ZNF385C	1.80821e-15	4.06999	COX6C	0.000692638	0.769096	SUSD3	1.63837e-10	7.19692	OPTC	0.0484905	1.94187			Somite								Somite								Somite
29	CSRNP1	3.16581e-05	2.04421	LSAMP	2.9312e-08	1.52732	NDRG1	3.67163e-12	2.48283	ARL1	4.21e-09	0.987134	NR2F2	4.42052e-14	1.83903	MYH9	7.82282e-16	1.91805	BMP2	0.000907319	2.9847	ISCA1	5.94203e-10	3.25142	DLG5	0.0533387	1.84508			Ectoderm								Ectoderm								Ectoderm
30	OPTC	3.7025e-05	1.30523	ZEB2	4.16338e-08	1.20151	PAK1	4.27896e-12	2.06319	ATP2B1	7.94621e-09	0.961296	FSTL1	3.87133e-13	1.07588	SOSTDC1	3.57566e-15	5.38556	DHRS3	0.00135675	2.58309	FAM210B	4.4301e-09	4.40578	SP5	0.0540395	1.47202			LP2								LP2								LP2
31	FZD4	3.75592e-05	1.78447	SYNPR	1.71398e-07	1.96984	SP8	2.49431e-11	1.33709	GNAI3	1.0912e-08	0.664827	GALNT1	4.58345e-13	1.57658	SPARC	1.44367e-15	1.78354	CDKAL1	0.00175702	1.76223	LMO2	1.13529e-08	6.02413	CTHRC1	0.0552152	1.84557			Blood								Blood								Blood
32	HOXD12	3.82636e-05	0.521092	MAD1L1	1.89598e-07	1.13448	HES4	2.44237e-11	1.00218	COL4A1	1.1947e-08	1.84664	RDH10	5.13051e-13	2.20287	INPP5A	2.23061e-15	2.30619	GLRX2	0.00181752	1.58798	SMAP2	5.41433e-09	2.7912	SDC2	0.0570933	1.4499			Notochord								Notochord								Notochord
33	ARID3A	4.28939e-05	0.555171	LIMD2	8.98064e-07	0.859337	ID4	2.4655e-11	1.18223	WNT3A	3.79797e-08	2.06045	DMRT1	1.2445e-12	3.15389	IGFBP2	1.82238e-15	1.73369	ID3	0.0018248	0.7897	ALAD	1.91528e-08	3.71995	CCDC60	0.059263	4.55979
34	HOXD11	4.54237e-05	0.648809	OSBPL5	9.60499e-07	1.49334	NCAM1	2.69499e-11	1.19526	ARID1B	5.32702e-08	1.38849	PCP4	7.87758e-12	1.90848	HEXB	6.11429e-15	2.40758	MID1IP1	0.00189199	1.42118	RPL37	9.49729e-09	1.21007	WIF1	0.0630315	2.22331
35	MTUS1	5.25773e-05	1.55303	TIMM50	1.28705e-06	0.854187	PKM	3.35462e-11	0.507219	AP5M1	6.343e-08	1.0688	CENPX	1.24241e-11	1.23928	SERTM1	1.32158e-14	3.61036	IGFBP2	0.00205756	1.02807	SLC25A37	9.21943e-08	6.6547	CTSV	0.0641365	1.1464
36	PLPP3	6.56838e-05	0.782363	OLFM1	1.98567e-06	1.19058	CERCAM	7.55197e-11	2.21889	PCBD1	1.01971e-07	0.93676	APLP2	1.50709e-11	0.963376	GPI	3.70435e-14	1.26435	PITX1	0.0022725	7.31004	ALDOB	1.19259e-07	6.68148	LEFTY2	0.0664205	4.7753
37	BAMBI	6.65405e-05	0.771986	CORO1C	2.11016e-06	0.745027	NMRK2	1.21266e-10	1.64281	SALL1	1.05248e-07	0.817673	TMEM47	2.14837e-11	3.04616	ATP1B1	5.89787e-14	1.74178	RASL11B	0.00215236	1.47269	ADA	1.53022e-07	5.44555	NOTO	0.0668062	2.09714
38	ACTB	7.30037e-05	0.205585	BTG2	2.28812e-06	1.19943	CMTM8	1.04815e-09	1.23317	MPZL2	2.19205e-07	2.56049	SUSD1	1.94302e-11	2.10501	COL14A1	1.55877e-13	5.95045	PRDX1	0.00219035	0.551968	ITGA2B	1.71727e-07	6.74802	DPYS	0.0673203	2.46916
39	UNC5C	8.01722e-05	1.45761	DCBLD2	2.57231e-06	0.7206	PLEK2	1.6162e-09	2.56825	SPRY2	2.1091e-07	1.32114	MESP1	4.50768e-11	3.23345	H3F3B	6.35733e-14	0.92853	LTF	0.00230292	2.1296	CA2	1.60657e-07	5.10323	ITPK1	0.0706114	1.81085
40	ID3	8.4439e-05	0.421959	SGPL1	2.78617e-06	1.02928	TUBA1A	2.16562e-09	0.672784	ANP32B	2.11473e-07	0.436149	SIX1	6.463e-11	2.36877	RPL37	3.46614e-13	0.837994	FAM107B	0.00232653	2.03105	YBX3	6.29246e-08	1.84162	NOV	0.0730716	4.28772
41	TNNC1	9.37479e-05	1.00084	ADGRL2	4.40735e-06	0.811431	CCND1	4.47827e-09	0.9565	MID1IP1	3.31925e-07	1.18402	TMEM100	5.99318e-11	1.67011	CCNI	4.07605e-13	1.378	QDPR	0.00271656	1.58011	SUSD1	1.20238e-07	3.18645	PEPD	0.0754663	1.06288
42	MYL9	9.522e-05	0.752717	AKAP12	4.79803e-06	0.733299	TUBB2B	4.536e-09	0.630921	SNX10	4.82091e-07	2.38924	GPC1	7.1212e-11	1.11487	ACTR3	5.80866e-13	1.32087	MYL9	0.0027512	1.27297	UBA52	7.6297e-08	0.888667	DISP1	0.0823675	1.92458				LP2								Blood								Notochord
43	HSPA8	9.99042e-05	0.264759	GRTP1	7.28689e-06	1.39625	HOXB7	5.58975e-09	1.47185	SAT1	6.17503e-07	1.2672	SRXN1	1.56905e-10	2.62184	FGF12	6.34044e-12	3.96725	KCNIP4	0.00298305	4.28266	STEAP3	4.35341e-07	7.66552	ANXA2	0.0829511	1.25684
44	LBX2	0.00010172	1.24302	GNAI3	1.03499e-05	0.471695	SPAG9	7.28996e-09	1.87859	COMTD1	6.43042e-07	1.55294	LEF1	2.41789e-10	1.28731	CLDN3	6.72341e-12	4.43387	RUNX1T1	0.00333369	2.70204	MCRIP2	3.18966e-07	3.81541	CCK	0.0868193	2.75782
45	Meis2a.2	0.00010203	0.707356	FAM46A	2.25591e-05	1.87101	GAPDH	7.47116e-09	0.340824	H3F3C	6.44141e-07	0.38835	LPAR1	2.58606e-10	1.78281	TSPAN13	5.48413e-12	2.7737	GLCCI1	0.00358189	1.04179	PRDX1	1.34217e-07	1.21264	AGRN	0.0869918	1.03577			LP								LP								LP
46	MBNL2	0.000138926	1.23548	APLP2	2.21212e-05	0.516578	CHD7	8.24411e-09	0.762165	HOXA9	2.0838e-06	0.637777	FGFRL1	4.38591e-10	3.17571	JUP	5.16633e-12	1.92395	LMO1	0.0038045	2.97853	FRRS1	6.29397e-07	4.87852	BTG1	0.0893797	0.708003			PSM								PSM								PSM
47	YWHAH	0.000140265	0.52336	TMEM35B	2.25038e-05	0.927563	GDPD4	1.11084e-08	4.26357	RALY	2.47833e-06	1.69192	ALDH1A3	5.28921e-10	4.33398	YWHAQ	5.20511e-12	0.950946	TCF12	0.00376916	0.702794	NT5DC2	3.09958e-07	1.97998	TXN	0.0902393	0.418191			Neural								Neural								Neural
48	NOG	0.000151278	1.24997	IL17RD	2.56687e-05	0.889995	DBNDD1	9.98722e-09	1.82429	NUP205	2.94205e-06	0.765851	FMOD	5.37054e-10	3.48102	TTC39A	1.28517e-11	5.478	S100A6	0.00390608	1.31303	METAP2	3.1648e-07	1.74497	CORO1B	0.0905404	1.12071			NMP								NMP								NMP
49	MIF	0.000168781	0.242925	KLHL9	2.86358e-05	1.04126	PDE6D	9.53336e-09	1.03431	SARNP	5.01249e-06	0.756543	CDON	6.77206e-10	2.13713	DDT	8.61881e-12	1.70497	LBH	0.00416461	2.54229	S100A10	5.02248e-07	2.67673	MCAM	0.091463	1.31266			Somite								Somite								Somite
50	SDCBP	0.000244029	0.492565	RAB30	3.78339e-05	0.993175	SELENOU	1.37037e-08	1.29966	CD3E	5.31773e-06	1.70023	CITED4	8.38673e-10	2.41397	GSTT1	3.42578e-11	4.56985	SPCS3	0.00460894	0.94514	EIF5A2	4.53864e-07	1.09263	LY86	0.0932536	3.09345			Ectoderm								Ectoderm								Ectoderm
51	PSMD1	0.00033494	0.337058	WLS	4.33128e-05	0.503497	YBX1	1.89192e-08	0.338882	EWSR1	6.60703e-06	0.996393	RIPPLY2	1.41177e-09	3.54007	TPD52	2.42945e-11	2.02474	GM2A	0.0048807	1.6845	ITM2A	5.69192e-07	1.7187	TLL1	0.0967179	3.18557			LP2								LP2								LP2
52	S100A6	0.000388748	0.688102	NTM	5.58312e-05	1.07017	VCAN	1.98023e-08	1.07576	TMEM123	7.28523e-06	0.852024	HSPA5	1.10597e-09	0.679814	TFAP2B	7.78145e-11	6.06769	BARX1	0.00537386	4.93275	EAF2	1.9042e-06	2.70352	TGFB3	0.100783	1.33658			Blood								Blood								Blood
53	SERPINF1	0.000433439	2.5269	SALL1	7.2833e-05	0.547257	XPA	2.05804e-08	0.747553	WNT8A	8.36905e-06	3.1117	DLL1	1.27608e-09	1.29526	GNG4	8.1666e-11	4.54803	SPARC	0.00514607	0.934675	CLOCK	3.66339e-06	6.87859	P2RX4	0.105009	2.83411			Notochord								Notochord								Notochord
54	COL6A3	0.000452782	1.17317	PPM1E	8.50279e-05	1.46315	HMGN4	2.25307e-08	0.409314	EIF3H	9.70694e-06	0.523039	CYR61	1.31527e-09	1.36906	NT5DC2	5.22129e-11	1.42261	TMSB15B	0.00521024	0.538025	NCOA4	2.61834e-06	2.13754	YOD1	0.107103	1.68455
55	SEMA3F	0.000452555	0.866592	APLNR	9.0475e-05	2.31088	GDF2	3.2271e-08	3.88728	NPM3	1.10154e-05	0.458504	SDC4	1.42722e-09	1.79451	TP63	8.62957e-11	3.44797	DPYS	0.00583433	2.5447	BLVRA	5.06627e-06	5.36651	PAPSS1	0.110285	1.14385
56	TGFB2	0.000544883	0.765841	SLC2A1	9.05116e-05	0.766291	DBX2	3.46721e-08	2.20362	HOXA11	1.1271e-05	0.61472	CRIP1	2.14338e-09	4.06972	DSP	1.37367e-10	4.5038	SHH	0.00617222	4.3314	AOC1	6.0129e-06	8.22325	PTPN6	0.111971	2.77651
57	HMP19	0.000804414	1.35824	LLPH	0.000102063	0.546329	SLC29A1	3.39313e-08	1.60809	BRSK2	1.29222e-05	1.31947	CA2	7.53948e-09	3.0763	PERP1	1.60486e-10	4.93683	NREP	0.00610134	0.858629	HAGH	6.40403e-06	4.71532	ATP5S	0.11364	2.16496
58	DCN	0.000803198	0.964207	SIK1	0.000120603	1.43706	AZIN1	3.56308e-08	0.766011	CMTM8	1.87762e-05	0.942824	TUBAL3	1.54653e-08	1.18696	COBLL1	1.95216e-10	3.19353	TPM4	0.00615754	0.81202	AHCYL1	4.94951e-06	2.7647	TAF7L	0.11447	1.6381
59	PAICS	0.000943406	0.461514	MKP3	0.00013407	0.716472	TCF7L2	5.55805e-08	1.05492	LYPD6B	2.07569e-05	1.53877	SLC35G2	3.25193e-08	1.99976	MT4L	2.01209e-10	3.07563	GPX1	0.00620166	1.04428	HEBP1	7.47729e-06	4.54858	GDF9	0.117836	3.87332
60	MAP3K7	0.000943876	0.61576	SMARCD2	0.000135869	0.649133	TMEM132C	5.89283e-08	1.49201	BAMBI	2.61981e-05	0.93925	STRA6	3.43994e-08	1.43033	CD44	2.36643e-10	4.74218	SRI	0.00646698	1.11774	INHA	8.74609e-06	5.5465	LMX1B	0.119098	4.882
61	GPR37	0.00098978	1.95063	RGS2	0.000156848	1.47215	BIRC2	5.847e-08	0.999851	HOXC9	3.10298e-05	0.783182	TWIST1	4.40383e-08	1.26241	TXNDC17	1.42676e-10	1.46054	NMT2	0.00665944	1.96141	REEP1	9.04542e-06	3.25983	SYNM	0.117916	1.86698
62	SNX7	0.0011182	1.80836	MTURN	0.000167408	1.34651	SCD	1.11006e-07	0.754257	B4GALT1	3.95909e-05	1.54598	RASA3	6.67586e-08	1.86695	GPC1	1.46058e-10	1.38633	BAG3	0.00688149	0.991578	ENPEP	1.29251e-05	9.20956	NDRG1	0.119656	1.73452
63	HOXC10	0.00111236	0.403799	TMEM120A	0.000169873	1.66695	ANKRD11	1.1644e-07	0.907578	DIXDC1	4.4896e-05	1.84166	KANK1	6.95279e-08	1.68533	SERPINH1	1.5363e-10	1.77176	PDCD4	0.00706364	0.842379	SPTAN1	8.41958e-06	2.02265	CRTAC1	0.119753	1.83864
64	GATA5	0.00113552	2.1662	ADD3	0.000187752	0.419988	THBS1	1.44773e-07	2.06248	APLP2	4.70318e-05	0.562419	GDF3	7.30178e-08	2.06984	PHLDA2	1.82349e-10	2.0497	TSPAN13	0.00740964	1.69804	NRBP2	1.4055e-05	6.04971	PDCD4	0.121462	0.68617
65	BHLHE22	0.00115811	1.79172	LSP1	0.000206488	0.747617	VTN	1.52682e-07	1.87372	PTCHD1	5.05433e-05	1.70705	CD38	8.94963e-08	2.4335	APOD	3.6716e-10	4.63205	DUSP1	0.00793241	2.13882	AP2M1	8.40134e-06	1.79629	DHRS3	0.124756	2.00044
66	MSL1	0.00121143	0.743986	CD3E	0.000291487	1.24905	NSG1	1.81713e-07	1.04125	GAD1	5.45817e-05	1.9139	CLEC19A	1.19081e-07	1.16449	ACTG1	2.39637e-10	0.643977	CDH11	0.0080304	1.42323	VDAC2	1.08132e-05	1.13563	HPCAL4	0.127644	3.55098
67	CELF2	0.00142503	1.19151	CXCR4	0.000301263	0.876417	RASL11AL	2.04736e-07	1.72648	DHX37	6.68809e-05	0.639861	TIMP3	2.40772e-07	1.2521	ACTB	2.58408e-10	0.54652	SLC25A22	0.0081783	1.5384	TMEM183A	1.55166e-05	2.19308	SPATS2L	0.128119	2.04846
68	SEMA6A	0.00155946	1.05103	RALY	0.000429997	1.18635	LDHB	2.8158e-07	0.388603	EDEM2	7.8255e-05	1.4037	OLFML3	2.50917e-07	1.75887	ASTL	6.9164e-10	6.46682	CELF2	0.00828823	1.92999	HK2	1.72695e-05	2.51904	B4GALT1	0.128835	1.43147
69	TIMM10	0.00159614	0.59366	GAS6	0.000493587	1.45993	CRYAB	3.35832e-07	1.47478	GJA1	9.03417e-05	0.515654	QPCT	2.43623e-07	1.207	EMX2	7.6939e-10	3.6272	NSA2	0.00822493	0.735803	SNX5	2.32281e-05	4.14347	TCTE3	0.130521	3.57812
70	MYCN	0.0016696	0.519609	CRISPLD2	0.000502307	2.18089	HOXA4	3.36118e-07	0.861806	RIPK2	0.000152796	1.88731	EBF2	3.22964e-07	2.53572	NANOS1	1.02628e-09	4.47148	CALM2	0.00851553	0.598716	NECAB2	2.79577e-05	6.71754	NCAN	0.134437	3.37013
71	BCL11A	0.00173167	0.998368	PRCP	0.000609303	1.16523	TCP1	3.77186e-07	0.50529	HOXA4	0.000176599	0.687428	PLOD2	3.13802e-07	1.39159	FKBP9	7.82854e-10	1.76867	EEF1A1	0.00903436	0.342746	DAB2	2.89456e-05	5.29796	HTRA1	0.134678	2.46167
72	KIFAP3	0.00183564	0.519432	KCNJ5	0.000683866	1.55124	PTTG2	3.80783e-07	0.740901	gga-mir-1723	0.000183185	1.24679	PCSK5	6.28654e-07	1.60417	angiopoietin-2	1.12599e-09	2.89042	GPC3	0.00942952	2.83106	SLC29A1	2.29004e-05	2.7125	CAPSL	0.142954	3.44158
73	CLIC4	0.00195451	0.681641	MID1	0.000837652	0.688336	RACGAP1	4.46816e-07	0.987782	CDX4	0.000189965	1.23612	PLPP3	6.47298e-07	1.24386	KRT18	1.27407e-09	2.95901	ATP5MC3	0.009168	0.514586	SLC9A3R2	3.42267e-05	3.40418	BRT-1	0.141392	0.816552
74	UNC5B	0.00214215	0.840171	RAP1GDS1	0.00101291	0.718232	PRRC2C	4.42533e-07	0.595874	PALD1	0.000190027	0.426587	GAS6	7.97736e-07	2.32508	YWHAZ	1.55486e-09	0.829165	DGKZ	0.00941205	1.50415	NFE2L2	3.20885e-05	2.90079	GFRA1	0.144457	3.16555
75	LRRC20	0.00217265	0.590705	CHST15	0.00118486	0.605515	ENKUR	5.5321e-07	2.53837	LDHB	0.000209197	0.290178	COL8A1	9.26871e-07	3.23289	CPM	3.02635e-09	4.66596	ZNF521	0.00944976	1.33725	GLRX5	3.23496e-05	1.65314	BMP5	0.144046	2.32483
76	2021-09-09	0.00221127	0.503975	ITGB3	0.00123347	2.17218	ZEB2	8.52384e-07	1.11868	KIF5C	0.000219508	0.94396	ALCAM	9.87809e-07	1.42024	TPT1	1.9803e-09	0.64774	EZR	0.00976636	1.77396	EPB42	5.75297e-05	7.71824	VCAN	0.145282	0.869654
77	SPARC	0.00227623	0.459785	TCEA2	0.00123324	0.485655	HOXA11	8.9264e-07	0.649968	DLL1	0.000250145	0.726231	RASGEF1B	1.37059e-06	2.03277	TMEM167A	2.63287e-09	1.4002	GLTP	0.00994176	2.60541	NARF	5.07731e-05	3.37978	MYO3A	0.14719	3.33288
78	CLEC3B	0.00229362	1.19744	CFD	0.00130872	1.32719	PGAM1	9.04815e-07	0.423893	FGF13	0.000265624	1.18087	DKK3	1.38555e-06	1.22103	SCRN1	3.61579e-09	2.71874	SELENOU	0.0101903	1.26353	APRT	4.57331e-05	2.30329	PTX3	0.14704	3.13524
79	SPR	0.00232801	0.783014	DPYSL3	0.00137566	0.586075	GLCCI1	1.17578e-06	0.844999	TIMM50	0.000298353	0.712929	HPCAL1	1.464e-06	1.27316	SH3YL1	5.75289e-09	3.38299	CNN3	0.0103008	0.664042	ACADL	4.33657e-05	2.0084	CTNND1	0.148625	3.06471
80	DDR2	0.00235623	1.30878	ERO1A	0.00139045	1.0147	JUN	1.68368e-06	1.16222	MSGN1	0.000312126	0.746607	EYA2	1.62057e-06	2.48119	CNN3	4.34825e-09	1.03955	RAB2A	0.0103185	0.761858	CIAPIN1	4.07075e-05	1.55378	CA10	0.149611	1.63526
81	CTSZ	0.0023842	0.802813	DKK3	0.00154665	0.705064	GPM6B	1.83637e-06	1.27147	B3GNT7	0.000407126	2.01883	GMDS	2.43863e-06	1.4156	NEK6	5.54137e-09	1.59995	METRNL	0.0106236	1.60333	RPL23A	4.89001e-05	0.82101	TRPC3	0.151952	3.03344
82	ASL2	0.00240196	1.96654	RAPGEF1	0.00156797	0.78994	CARS	2.58457e-06	1.15448	HOXD11	0.000459872	0.665898	MAGI1	3.68479e-06	2.32965	FARP1	7.73774e-09	1.43595	CAPRIN1	0.0107913	0.777448	ZFPM1	7.01805e-05	3.66705	TBXAS1	0.151864	2.40436
83	MRPS10	0.00253629	0.555223	CSRP3	0.0017031	2.43177	DAAM1	3.04248e-06	1.00462	EPHA1	0.000521799	1.91629	OLFM1	3.77766e-06	1.35202	AP1S3	1.09852e-08	2.27862	EVX1	0.0111108	2.08312	MYC	6.52303e-05	2.35564	PALMD	0.153686	2.26082
84	NR3C2	0.00258622	0.797347	PVALB	0.0018774	1.09965	HOXB5	3.5067e-06	0.726786	CDH2	0.000547927	0.426962	STBD1	4.69232e-06	2.5778	LASP1	1.0545e-08	1.26117	BCAP29	0.0112319	1.30787	RFESD	9.17522e-05	7.51004	GLRX	0.154097	2.2997
85	H2AFZ	0.00306187	0.245339	GORASP2	0.00190003	0.550572	GRAMD4	3.69095e-06	1.54279	AXIN2	0.000557315	1.52282	MANF	6.70005e-06	0.885084	MYL9	1.24113e-08	1.66655	IGF2BP3	0.0119024	0.54406	UBE2H	6.5021e-05	1.52398	WRNIP1	0.154384	1.8736
86	JPT2	0.00318573	0.372507	WDR36	0.00209936	0.511668	HMGB2	4.05827e-06	0.432661	PSMD1	0.000607714	0.391539	ID3	6.83821e-06	0.639646	TPM3	1.35366e-08	0.866139	KCNE3	0.0126529	4.87565	TST	9.71177e-05	2.80461	CPE	0.154757	2.27838
87	GNAI2	0.00323037	0.333832	PTTG1IP	0.00226035	0.699168	IMPDH2	4.06833e-06	0.500395	MAOA	0.000683991	3.17532	KDELR2	7.27701e-06	0.648998	CARMIL1	2.13295e-08	2.39487	AHR	0.012777	2.88174	FOS	0.000105261	3.03753	LCAT	0.15547	3.03124
88	HOXA11	0.00331575	0.339129	TRIM27.2	0.00247558	3.55582	OLIG2	5.45453e-06	4.63918	TXNDC5	0.000726081	0.552528	HSP90B1	8.82221e-06	0.616575	BASP1	1.86827e-08	1.07684	NR3C2	0.0126209	1.51099	GCAT	9.86824e-05	2.42942	DEGS1	0.156224	1.12095
89	FZD2	0.00341393	0.913405	NEBL	0.00251646	1.62633	MTAP	5.21654e-06	0.941058	SP5	0.000750154	1.00894	ATOH8	9.47376e-06	2.22949	TJP2	2.50668e-08	2.48794	IDH2	0.0131504	0.962872	RCL1	0.000101318	2.29849	NPR3	0.157	2.21321
90	LAMP5	0.00343512	1.80181	CERK	0.00254483	0.849033	PSIP1	5.98052e-06	0.943421	HOXA5	0.000761746	0.788759	SNAI1	1.12661e-05	1.91839	RARB	3.81635e-08	3.02985	SIX1	0.0136926	1.6139	TXN	8.70767e-05	0.953607	COPB1	0.156503	0.989656
91	CCT6A	0.0037385	0.233849	CLMP	0.00260835	1.26963	CENPF	6.41793e-06	0.8517	ID4	0.000841585	0.661079	CCDC88C	1.12086e-05	1.72335	PDLIM1	3.65426e-08	2.72914	EXOC1	0.0138434	1.81718	SLC6A13	0.000142138	6.59873	MTFR1	0.158521	0.891072
92	SLC28A3	0.00430435	1.69715	PPP2R3C	0.00329221	1.04339	PSAT1	6.93311e-06	0.912654	CTNNBIP1	0.000907115	0.9194	PENK	1.18134e-05	3.35309	APP	4.98807e-08	1.4674	HIF1A	0.0146931	1.01827	MEMO1	0.000105742	1.53036	MPP3	0.15979	2.21021
93	NEDD9	0.00450163	1.52146	FBXO2	0.00356504	1.76202	PALMD	7.91761e-06	2.7133	HOXB5	0.000912579	0.559307	RNF11	1.16021e-05	1.09652	ATP6V1G1	6.47669e-08	0.884301	PRR5	0.0152772	1.32337	TUBA1B	0.000109335	0.602214	CTGF	0.161653	1.3036
94	GPX3	0.00475269	1.42601	NSMCE2	0.00510796	1.13371	CDC20	8.19711e-06	0.700676	BAG3	0.000952107	0.672769	EIF5B	1.38711e-05	0.60143	SCARB2	7.67575e-08	2.42971	UFM1	0.0155317	0.92312	ARHGEF39	0.000134599	2.6133	CASTOR2	0.162075	1.55037
95	VOPP1	0.00486266	0.913577	MVK	0.005207	0.594531	CCDC14	8.93275e-06	1.40913	RALGPS2	0.00102182	0.779888	RND2	1.49553e-05	2.92993	NBL1	7.9282e-08	1.21448	TNFRSF21	0.0163947	1.64089	SLC43A3	0.000147738	3.59567	NKX6-1	0.164294	6.86675
96	SEM1	0.00507321	0.255142	HS6ST2	0.0053395	1.38265	MIF	1.1175e-05	0.330266	ADD3	0.00115828	0.413707	ROCK1	1.42471e-05	0.989304	EMB	9.93819e-08	2.17462	PLCG1	0.0165289	1.19375	ODC1	0.00012539	1.55976	FKBP1B	0.163078	1.79027
97	GFRA2	0.00521015	1.28649	LPAR1	0.0054528	0.702772	FSTL4	1.35383e-05	1.79516	EEF1B2	0.00138954	0.219174	NTN3	1.82381e-05	3.1986	SH3BGRL3	9.69852e-08	1.22067	PEF1	0.0166722	1.50348	VDAC1	0.00016237	3.88209	FAM107B	0.163353	1.40275
98	VSTM2L	0.00532215	0.998997	CD24	0.00676424	0.389541	FAM133B	1.3642e-05	0.587802	BORCS5	0.00142023	0.902913	TSKU	1.81395e-05	1.82669	KRT14	1.25748e-07	4.12252	EPHB3	0.0167896	1.85289	OSBPL6	0.000173074	4.73364	ETFA	0.164149	0.5263
99	GSTM2	0.00539565	0.956165	PLXNA2	0.00711837	3.22211	CXCR4	1.38808e-05	1.1436	GLO1	0.00168003	0.532636	CD82	2.30674e-05	2.24414	TUBAL3	1.296e-07	1.39691	PTP4A1	0.016681	0.730416	SOD1	0.000127468	1.15512	CTSA	0.164379	1.01312

## Sheet: Chick_all_stages (Figure 3E)
Rank	postPS	pvals	log2foldchanges	Epiblast	pvals	log2foldchanges	PSM	pvals	log2foldchanges	NMP	pvals	log2foldchanges	Mesoderm	pvals	log2foldchanges	Neural	pvals	log2foldchanges	Somite	pvals	log2foldchanges	Ectoderm	pvals	log2foldchanges	LP	pvals	log2foldchanges	Endoderm	pvals	log2foldchanges	LP2	pvals	log2foldchanges	Notochord	pvals	log2foldchanges	Blood	pvals	log2foldchanges
0	MSX2	8.28198e-50	2.09597	PLPP1	1.18753e-219	3.46515	MSGN1	3.0193e-97	2.65678	TBXT	4.50127e-120	2.37033	AGRP	1.6058e-97	4.41967	HES5	2.23489e-133	5.14247	MEOX1	7.5148e-149	4.97133	FN1	1.1585e-61	3.14669	Wpkci-7	2.48259e-06	0.897684	SOX17	1.61159e-38	5.64811	LIX1	3.79202e-27	7.1815	CHRD	3.16184e-33	6.26985	HBZ	4.91086e-98	15.1607
1	ID2	3.27053e-37	1.16336	CLDN1	1.8032e-171	2.82318	FGF18	1.86424e-93	2.91176	APCDD1	1.33359e-45	2.49786	ALDH1A2	8.17424e-47	2.64432	PMP22	1.23283e-68	4.68336	TCF15	3.14507e-108	4.84363	ANXA2	3.99319e-55	4.85431	UPB1	0.00331258	4.75893	KRT7	3.52139e-30	3.60076	PRRX1	2.46556e-24	4.12569	TBXT	6.02883e-20	1.89129	HBBR	3.87498e-85	15.8473
2	TWIST1	6.25331e-36	2.18266	LARP7	2.52246e-101	2.44914	DLL1	9.66993e-52	1.984	RASGRP3	1.59958e-40	2.67636	AKAP12	1.82288e-44	1.67196	COTL1	2.44877e-50	2.06845	SHISA2	2.05025e-77	3.62148	NREP	2.22512e-53	3.68652	SLC25A24	0.00363551	3.60665	GATA5	2.7075e-18	2.76947	S100A6	9.72918e-23	3.68818	NOTO	9.25518e-16	4.10857	HBM	2.79164e-80	15.25
3	PRRX1	4.8297e-25	2.33356	UCH-L1	9.22244e-83	2.10754	CDH2	1.04584e-42	1.16011	FGF19	4.50685e-32	2.97931	MESP1	5.76183e-34	2.68925	GBX2	4.95479e-48	2.76858	NBL1	3.44899e-60	3.49706	PDGFA	4.42708e-52	3.52719	ZNF236	0.00620635	3.70897	PLCXD1	3.55822e-16	5.07862	MNX1	4.33795e-13	5.11919	LTF	8.2822e-11	4.21539	HBE	1.61838e-80	15.1835
4	ID1	8.70759e-20	0.890024	AP1S3	1.15686e-78	2.69948	PPFIBP1	1.03587e-41	1.42932	CHST15	2.99751e-32	1.97007	CDH2	3.38883e-31	1.1265	RHOB	3.11868e-36	2.12858	NPY	1.35831e-56	5.57832	KRT7	2.86781e-42	3.57309	KNDC1	0.00836001	3.92664	APOA1	8.0534e-16	4.23703	ID3	1.64512e-13	1.54987	NOV	6.69777e-10	4.84269	HBA1	8.87728e-77	15.3317
5	FIBIN	1.0337e-18	1.7554	EPCAM	2.44283e-51	1.94004	HAPLN1	3.82466e-33	2.13522	WLS	6.7407e-31	1.22042	GATA5	1.78712e-27	2.32461	VIM	4.41893e-33	1.65573	SMOC1	1.08797e-45	2.8368	CXCL14	9.80365e-38	4.57529	PGA3	0.0109467	3.72472	KRT18	2.77299e-14	2.38632	GAPDH	2.77022e-11	0.68151	SST	1.31028e-08	4.22382	SLC4A1	5.18503e-37	10.1704
6	MSX1	1.43007e-15	0.785816	Wpkci-7	4.5912e-44	1.46887	TMEM100	1.89674e-30	2.3582	FGF18	1.72664e-25	1.65172	RDH10	3.52694e-18	1.87475	HOXA11	3.2201e-30	1.87914	NOTCH1	1.43112e-38	2.14324	S100A11	1.59425e-36	4.34301	HMX2	0.0140857	23.5788	ANO3	8.91628e-12	2.87961	HOXD13	5.37202e-11	3.20991	angiopoietin-2	3.41688e-07	3.02627	TSPO2	7.4056e-35	8.32821
7	BAMBI	7.48096e-13	1.02377	PGM1	4.44097e-41	2.28488	SMOC1	4.15468e-27	1.57584	HOXA7	4.10758e-25	1.57734	CD24	2.32225e-17	0.986719	ACVR2B	4.80391e-28	1.87041	COLEC12	3.22326e-37	2.96941	KRT19	5.95172e-32	2.39874	CDH5	0.0163808	2.60447	PITX2	2.13511e-11	3.64721	HOXA9	5.16405e-11	1.65127	CDH2	1.34657e-05	0.848684	FTH1	9.34509e-42	3.69172
8	HOXD8	8.87841e-11	1.15104	ING5	1.37898e-40	2.70658	CLEC19A	3.28307e-23	1.35459	WNT5A	1.608e-23	1.2595	CLEC19A	7.44543e-17	1.26828	PTN	1.52528e-26	1.99433	TMSB4X	2.57732e-37	1.24257	IRF6	1.4045e-30	3.53245	PTPN4	0.019375	3.24914	Wpkci-7	5.21196e-11	1.27142	NREP	2.05674e-10	1.82141	FOXA1	0.000143574	2.9344	TFRC	3.52173e-27	6.01593
9	EBF3	2.0137e-10	1.80027	YEATS4	2.86311e-39	1.73826	NOTCH1	1.31194e-22	1.17274	CD99	8.49912e-23	2.13241	KDR	4.39594e-16	3.28735	TUBA1B	1.97412e-26	0.598569	DCBLD2	2.68082e-33	2.26497	MDK	3.57803e-29	1.44181	RGS5	0.0202203	5.3195	FOXA2	1.00346e-10	3.60663	HOXD12	4.30714e-10	1.77266	C9H2ORF82	0.000161816	3.58613	UROD	8.35652e-28	5.38509
10	CDH11	2.55142e-10	1.12568	HTRA1	8.07047e-39	2.95807	RNH1	6.99979e-21	1.05558	GJA1	1.11538e-20	0.895593	JAM3	1.19825e-14	1.18039	APOH	4.30736e-25	4.99535	MPP6	1.04165e-32	2.46254	WNT6	2.54913e-25	7.28309	DTX1	0.0251258	23.3143	PDZK1IP1	2.82142e-10	3.51845	KIFAP3	5.62948e-10	1.95337	POSTN	0.000250128	2.16775	HDGF	4.45772e-28	2.54632
11	WNT5A	4.03868e-10	0.683906	FRZB	9.20506e-36	2.18475	DCBLD2	3.27258e-19	1.27103	DLL1	3.51202e-19	1.28343	SGPL1	3.75898e-14	1.36971	GNG10	2.46545e-25	2.13666	PTN	1.04442e-28	2.32251	TMSB15B	1.16039e-25	1.15724	FGD4	0.032558	2.93122	TMSB4X	2.72868e-09	0.75915	LTF	5.55703e-09	3.33568	TIMP3	0.000394592	2.03528	TUBB1	7.80943e-20	7.49091
12	BMP4	1.02889e-09	1.67456	B2M	2.06067e-33	1.80606	LRIG3	3.95217e-19	1.45158	HOXD12	6.80626e-18	1.47598	PALD1	5.12492e-14	0.693946	GLIPR2	9.47142e-25	2.48878	ANXA5	1.70648e-28	2.4631	TPM1	2.95149e-25	1.82169	HYKK	0.0385985	2.70577	RGN	3.55313e-08	1.96765	ISL1	9.74972e-09	4.36299	WIF1	0.000545832	2.77611	PRDX3	2.57013e-23	3.04749
13	MDK	9.94301e-09	0.409273	METAP2	2.29036e-33	1.12013	MEOX1	1.00414e-18	1.44949	CDH2	1.54383e-17	0.816251	PRTG	5.12885e-14	0.853943	HOXC10	9.92302e-23	1.73195	GPC4	1.65178e-27	2.11396	PURH	6.08305e-25	1.64841	BTBD8	0.0490174	1.69495	NDRG1	5.04521e-08	2.17659	RASL11B	9.27589e-09	2.50755	CA10	0.000705769	2.52577	PABPC1	1.10656e-23	2.61317
14	COL1A1	2.33628e-08	1.47714	XPA	4.15106e-33	1.12045	ARHGDIB	1.64388e-18	1.20683	MSX1	1.38946e-16	0.953702	FST	9.21029e-14	2.55888	CTGF	3.05427e-22	3.05572	FSTL1	1.82568e-27	1.90435	GPX1	1.47548e-24	2.09383	gga-mir-12259	0.0607203	3.60811	AIF1L	1.73632e-07	2.55833	BAMBI	1.23547e-08	1.66414	GOLPH3L	0.00122027	4.43068	HMBS	1.13937e-20	4.36666
15	LDHB	1.55234e-07	0.290962	VRTN	7.02572e-32	1.86827	PCP4	8.89427e-17	2.01186	ENHO	2.79511e-14	1.58908	POMC	7.86059e-13	2.10475	HOXD12	4.78799e-21	1.65512	RHOU	7.35811e-25	1.94206	IGFBP2	6.92321e-22	1.96408	ZBTB21	0.0676815	2.91913	EZR	2.19183e-07	1.92512	KRT7	1.44335e-08	2.14899	STRA6	0.00118367	1.2997	FECH	1.55347e-18	6.14743
16	FLI1	2.4706e-07	2.34403	MARCKSL1	1.47907e-30	1.02207	METTL6	1.74402e-16	1.36115	APLP2	3.60656e-14	0.825412	MT4L	3.508e-12	1.32602	SCD	1.65851e-20	1.41954	POSTN	5.73199e-24	3.72391	BTG1	5.67885e-21	1.7401	CRABP-I	0.0677757	0.904649	FOXA1	2.65633e-07	3.25869	LGALS3	2.83996e-08	3.89948	SERPINE2	0.00121887	1.59182	RBM38	3.33279e-18	4.1727
17	JAM3	2.50352e-07	0.654295	CALM2	1.04993e-28	0.853961	LEF1	2.17076e-16	1.25163	AKAP12	4.15469e-14	0.901635	NPBWR1	1.43382e-11	3.21254	HES4	1.36932e-19	1.4396	PPFIBP1	7.25279e-23	1.53392	CCNI	9.4616e-21	1.80634	PLTP	0.0728392	1.69791	PRTG	2.64273e-07	0.935488	ATP5MC3	6.11614e-08	0.815445	LGMN	0.00130678	1.4814	ABCB10	1.2491e-16	5.70761
18	HOXA11	3.43009e-07	0.683534	MPZL3	1.81436e-28	1.8303	DHX37	4.32127e-15	0.993973	WNT8A	8.02822e-14	1.64617	CFC1	8.48852e-11	1.37452	NCAM1	3.91559e-19	1.6681	RNH1	1.97332e-22	1.58286	H3F3B	6.89002e-20	1.04766	KCNK3	0.0965677	5.18003	RBP4A	7.6449e-07	4.33767	EEF1A1	1.45986e-07	0.495756	SHH	0.00141674	4.74758	CCND3	4.55219e-17	4.637
19	SNAI1	4.71175e-07	1.56531	GPX4	1.49038e-27	0.973804	COLEC12	7.65789e-15	1.41876	METTL6	2.77342e-13	1.31018	TUBA1C	9.72015e-11	0.633529	SFRP2	4.00663e-19	1.77469	LFNG	6.19595e-22	2.09174	DCN	6.30068e-19	3.89129	IFNG	0.103663	4.59501	GATA6	8.9737e-07	4.24701	HOXA11	1.6572e-07	1.40007	APLP2	0.00139819	0.713964	HBBA	9.04797e-16	11.7849
20	PRRX2	5.01519e-07	3.04891	NT5DC2	2.61541e-27	1.07327	APLP2	1.26625e-14	0.792326	FGF8	2.59433e-12	2.55999	MSGN1	1.36653e-10	1.03185	TUBB4B	8.40349e-19	0.912696	CYP1B1	2.65602e-21	3.56437	DLX5	6.06835e-19	2.57266	CHGA	0.107868	1.74693	LIN7C	9.86947e-07	1.5692	KRT18	2.51536e-07	1.88242	VTN	0.00146045	1.39032	AK2	6.1285e-18	2.94005
21	HOXC10	5.5293e-07	0.717225	EDNRB	2.90759e-26	2.99824	STMN1	2.72238e-14	0.494026	EPHA1	3.36041e-12	1.83944	EEF1D	1.71894e-10	0.406048	HOXA4	2.09941e-18	1.63411	FABP5	4.545e-21	2.46268	BASP1	4.73897e-19	1.56436	PPP1R9A	0.109377	1.32281	SCIN	1.14966e-06	4.00868	FOXA1	4.9444e-07	3.81404	Wpkci-7	0.00164461	0.777553	TAL1	5.30237e-15	7.11713
22	LIMD2	8.44445e-07	0.815371	DNMT3A	3.98751e-26	0.992692	PTN	2.00582e-13	1.23789	APBB1IP	6.63432e-12	3.15313	CCDC88C	2.3355e-09	1.42165	RASL11B	2.55654e-18	2.41047	LRIG3	8.85372e-20	2.04472	MCAM	8.98751e-19	2.6356	SLC25A12	0.112344	1.1702	TPM4	1.16938e-06	1.08317	HOXD11	6.51636e-07	1.81906	TBC1D8	0.00308744	2.17108	GPX1	1.4189e-15	2.94906
23	MFAP2	9.01778e-07	0.730421	CACNG3	3.07275e-25	1.69339	ANXA5	4.42996e-13	1.22989	ARHGEF9	6.58752e-12	1.9218	GDF3	5.20551e-09	1.56868	HOXB5	2.50801e-18	1.52669	GPC1	3.86276e-19	1.74671	ACTG1	1.04223e-18	0.869516	MRAS	0.114779	0.810646	SLC5A1	1.61353e-06	3.68447	Meis2a.2	1.48355e-06	1.52211	SEMA3D	0.00317847	3.06803	MGST3	1.16097e-14	3.19454
24	SDC3	9.40776e-07	0.693367	CDCA7L	8.74333e-25	1.10678	ENHO	4.66669e-13	1.45085	WNT3A	3.04549e-11	1.98224	LZTS1	6.23469e-09	1.82022	ENO1	6.55049e-18	0.588859	HSPA5	4.66196e-19	1.0532	PKD2	6.87021e-18	4.91631	CASS4	0.115461	2.68888	TNFSF10	3.29814e-06	1.36959	VEGFD	1.85681e-06	4.97107	COL4A1	0.00330413	1.59739	TPCN2	1.01939e-12	10.8942
25	HOXA9	2.3372e-06	0.587726	PDGFA	9.49301e-25	1.50861	CADM1	6.06274e-13	1.16742	HOXB7	4.87671e-11	1.46375	DACT1	9.5747e-09	1.9414	PAX6	1.99362e-17	4.7565	PAX7	3.39109e-18	3.27161	DMD	7.49733e-18	2.03913	AQP11	0.140829	2.40087	AKR1D1	5.32159e-06	1.69405	TXN	2.20776e-06	0.71014	CTXN2	0.00365222	2.62281	MBNL1	2.07639e-12	4.86606
26	GREB1	7.63116e-06	0.827501	HELLS	2.10524e-24	0.938967	AKAP12	5.49925e-12	0.783272	NKAIN4	2.03531e-10	1.26429	AMN1	1.75906e-08	2.02105	HOXA9	1.20234e-17	1.33458	GADD45B	2.73789e-18	2.53883	ESRP2	1.75824e-17	2.56814	MAP1LC3C	0.141742	1.937	TGM2	7.62984e-06	4.03933	RPL8	2.24618e-06	0.510921	SYT4	0.00445842	6.17713	ARID3A	2.5718e-12	2.71721
27	HOXD12	8.27486e-06	0.652403	ACOT7	3.34781e-24	1.39592	ZEB2	9.37331e-12	1.24419	SDC3	3.3837e-10	1.08396	KRAS	3.35762e-08	0.852706	FABP6	8.17629e-17	3.66011	NR2F2	3.75504e-18	2.60485	ID3	1.94489e-17	1.37841	CUX2	0.148813	1.87368	CALM2	6.92013e-06	0.722528	MDK	3.2954e-06	0.772751	IGSF21	0.00480462	1.94183	SLC25A39	9.66973e-12	2.95215
28	ATP6V1G3	9.74561e-06	2.65076	SLC25A5	5.23261e-24	0.833963	C10H15ORF59	1.17775e-11	2.99335	WNT5B	7.87273e-10	1.29331	PBX3	1.91018e-07	2.02951	PDE6D	9.10128e-17	1.70572	ID3	3.49331e-18	1.42792	COL17A1	1.57085e-16	5.75448	PITX2	0.151403	0.878074	MYL9	1.39812e-05	1.12809	STMN1	3.47606e-06	0.623117	POMC	0.00557838	1.48506	SUSD3	1.4101e-10	8.03753
29	SMAD6	1.03515e-05	0.808289	TRIM71	9.14786e-24	1.24776	ADGRL2	2.94908e-11	0.962999	GREB1	1.65308e-09	1.30576	NTM	3.043e-07	1.20806	HMGN4	8.75572e-17	0.603245	TUBAL3	6.39811e-18	2.20515	TFAP2A	1.25396e-16	3.60471	HELB	0.152351	3.00968	ALDH1A1	1.93819e-05	3.97764	COX6C	3.89741e-06	0.806661	MYO3A	0.00670509	3.38517	ISCA1	1.66505e-10	3.57875
30	MTUS1	1.69574e-05	1.60274	TMSB15B	1.04991e-22	0.613266	RSPO3	5.49333e-11	1.53206	DRAXIN	2.95322e-09	1.83264	GATA2	4.97453e-07	1.25757	LMO4	1.28517e-16	1.1235	IGSF21	1.965e-17	3.70624	CDH1	1.03723e-16	2.96277	AVD	0.152351	3.00968	CHMP2B	1.86076e-05	1.55661	MMP2	6.56955e-06	2.73678	SPARC	0.00697511	0.771035	RPL37	2.06944e-10	1.38012
31	HOXB5	1.85392e-05	0.602924	FGFR3	1.93995e-22	2.11908	GNAI3	6.5808e-10	0.586918	JARID2	3.44747e-09	0.882071	SETD6	9.8684e-07	1.00156	CKAP2	2.72551e-16	1.0281	MMD	1.59361e-17	1.64814	INPP5A	8.35201e-17	2.20641	TBX6	0.15431	1.46199	EPCAM	1.96252e-05	1.06442	SDCBP	6.67852e-06	1.05686	GCHFR	0.00745513	1.50794	SMAP2	1.43213e-09	3.03581
32	DLX5	2.08839e-05	0.79099	CA2	3.78287e-22	2.45027	LIMD2	1.04343e-09	1.14033	SCD	3.58218e-09	0.859501	SLC11A2	2.05441e-06	0.997895	TCP1	3.18796e-16	0.829177	CYR61	4.25417e-17	2.32143	HEXB	1.11231e-16	2.64924	CLDN16	0.17072	5.59363	LSP1	2.21819e-05	1.3504	chPKCI	8.67254e-06	0.855051	OLFML3	0.00755157	1.52755	YBX3	1.12833e-09	2.2187
33	BHLHE22	3.12964e-05	1.49801	RANBP1	4.69754e-22	0.760777	OLFM1	1.0822e-09	1.27193	GAD1	7.40212e-09	2.00455	VRTN	2.07385e-06	0.96724	TMEM123	8.88713e-16	1.57833	TBX22	2.37436e-16	5.55998	ZNF385C	2.98183e-16	3.96487	SIN3B	0.172017	1.7651	LIMK2	3.09037e-05	2.06786	ANXA1	1.27646e-05	7.14618	SP5	0.00868779	0.723778	FAM210B	5.5372e-09	4.28149
34	VSTM2L	3.61579e-05	1.29227	G3BP1	5.89185e-22	0.958592	HOXA4	1.73638e-09	1.03115	TPST1	8.27361e-09	0.823802	PMVK	2.43766e-06	0.890496	MARCKSL1	2.77069e-15	0.9087	CDH20	1.07429e-15	3.76787	SERTM1	4.23756e-16	3.1562	CALR	0.172207	1.24873	RGL1	6.27062e-05	2.45046	HIPK3	1.13027e-05	1.76025	ERGIC2	0.00880042	0.907107	SUSD1	7.96626e-09	4.22312
35	ZNF423	3.67002e-05	0.546342	HSP90AA1	1.2598e-21	0.64975	SYNPR	3.10531e-09	2.23894	TESC	1.27759e-08	1.54675	SSH2	2.52305e-06	1.51701	YBX1	2.73036e-15	0.462617	SUSD1	9.5455e-16	3.10681	YWHAQ	2.04407e-16	1.02117	CCDC122	0.180501	2.59446	GUCA2A	8.19592e-05	4.25768	CELF2	1.49902e-05	2.60597	STK10	0.00906718	2.46703	UBA52	3.71324e-09	1.03479
36	CSRNP1	4.3419e-05	1.78668	PRDX1	6.82903e-21	0.616522	ACTN1	3.60287e-09	0.792442	ATP2B1	1.28678e-08	0.747412	GCHFR	3.08018e-06	1.49914	ALDOC	3.42988e-15	0.66262	APLP2	1.41881e-15	1.1451	MYH9	4.23769e-16	1.71954	SHLD1	0.181576	1.68571	WBP1L	7.82362e-05	1.57571	NR2F2	1.76008e-05	1.8435	FOXA2	0.0102596	1.82184	ALAD	1.20796e-08	3.9218
37	SKAP2	4.42757e-05	0.406241	YWHAH	8.55754e-21	0.988442	PRCP	6.13964e-09	1.74277	SPRY2	2.40241e-08	1.2293	GJB6	5.66187e-06	2.12118	FAM181A	1.09234e-14	5.76748	PCP4	1.02987e-14	2.59468	SOSTDC1	1.14759e-15	5.07883	gga-mir-1732-1	0.184305	4.59357	BLVRA	8.37543e-05	2.73261	TCF21	2.22096e-05	5.23326	LEFTY2	0.0118115	3.05966	LMO2	2.059e-08	5.12349
38	TGFB2	4.51339e-05	0.799195	DUSP14	2.26894e-20	1.76736	GDF3	6.51395e-09	1.42348	GNAI3	3.76819e-08	0.554959	CRABP-I	8.42044e-06	1.44066	TUBA1A	6.19023e-15	0.848028	LPAR1	1.25229e-14	2.3814	RPL37	1.14162e-15	0.84143	CNGA1	0.184147	1.97547	ID2	0.000102489	0.756025	MID1IP1	2.10765e-05	1.53359	CAPSL	0.014841	3.48112	SLC25A37	8.82059e-08	6.8352
39	FABP7	4.93983e-05	0.536593	SLC35E3	4.50383e-20	1.26816	TIMM50	9.63899e-09	0.934059	HOXA9	5.79937e-08	0.827321	ESPNL	9.04253e-06	3.4636	HOXB7	1.03847e-14	1.81043	SIX1	1.62827e-14	3.11382	CSRP2	3.63306e-15	3.65172	IFT27	0.1906	1.18279	TSPAN8	0.000125172	7.92161	COX7C	2.42704e-05	0.583698	HAS2	0.0148648	1.034	ITM2A	2.66366e-08	2.00418
40	NUCKS1	5.78041e-05	0.254976	AKR1D1	5.08273e-20	1.76901	OSBPL5	2.88905e-08	1.47879	ARL1	6.66449e-08	0.845012	BF1	1.25763e-05	2.15379	NUCKS1	1.19891e-14	0.6482	TWIST1	2.34753e-14	1.98164	TXNDC17	2.46664e-15	1.6708	WDR11	0.192128	1.91789	DHRS11	0.000135233	1.48129	UNC5C	2.97174e-05	2.72038	DISP1	0.0154263	1.69659	TXN	3.18229e-08	1.4516
41	LBX2	7.04102e-05	1.15832	ENPP2	1.49779e-19	3.04083	TMEM35B	6.40247e-08	1.04787	C9orf3	7.47063e-08	2.02739	TBXT	1.54724e-05	0.509245	WNT4	2.29533e-14	4.13271	TIMP3	3.15727e-14	2.35012	GPC1	3.54743e-15	1.72244	CDK12	0.192856	1.16128	TNFRSF6B	0.000151075	4.25587	MFAP2	3.05815e-05	1.26119	PHACTR1	0.02049	2.44116	ALDOB	1.32575e-07	6.36369
42	C1orf216	7.57809e-05	1.25053	SP5	5.28319e-19	1.04845	CXCR4	7.91088e-08	1.17224	PDE6D	1.06888e-07	1.05504	AGRN	1.70176e-05	0.834799	SP8	3.04938e-14	1.50554	DMRT1	4.63701e-14	3.68956	TMEM167A	9.78198e-15	1.67233	C7orf26	0.196218	0.542208	ARHGAP11A	0.000152333	1.09165	NR3C2	3.43111e-05	2.0738	TLL1	0.0217941	3.11773	PRDX1	3.59428e-08	1.31896
43	ZEB1	7.79841e-05	0.75544	SFRP2	7.04159e-19	1.36758	ADD3	8.44934e-08	0.497107	GULP1	1.29606e-07	1.47662	GOLIM4	1.86259e-05	1.18003	PODXL	5.94861e-14	1.86426	CENPX	4.24883e-14	1.46814	GPI	3.38474e-14	1.14063	IKZF3	0.198346	4.00855	KRT19	0.000181271	0.867282	ARL4C	3.35771e-05	0.986006	NPY7R	0.02774	3.79479	ITGA2B	1.55778e-07	7.23138
44	GATA2	8.92506e-05	0.787184	ADSS	7.62332e-19	1.04381	MAD1L1	8.6786e-08	0.970684	LGALS8	2.05805e-07	1.26275	ALDOC	2.47106e-05	0.346288	HDGF	1.52774e-13	0.590902	RASD1	8.9616e-14	4.4063	YWHAZ	3.79154e-14	0.966035	IL7R	0.198346	4.00855	UCH-L1	0.000216659	0.799638	COL1A1	5.7716e-05	2.10497	PDIA4	0.0290159	0.580018	ADA	1.65793e-07	5.31558
45	PSMD1	0.000102869	0.318986	METRNL	1.68331e-18	1.63695	FAM46A	1.03924e-07	2.46039	HOXA4	2.53812e-07	0.948108	COL13A1	3.91992e-05	1.73305	BIRC2	3.32997e-13	1.42333	TMEM100	1.30261e-13	2.20048	ACTR3	4.88613e-14	1.26734	CTLA4	0.198346	4.00855	MYL12A	0.000234954	0.628072	CYP26A1	6.24183e-05	2.38131	CXCL13	0.0324318	5.82745	TUBA1B	5.91966e-08	0.900192
46	CFC1	0.000107804	0.697586	PTGES3	1.54463e-18	0.687061	CHST15	1.00522e-07	0.866375	B4GALT1	4.31557e-07	1.4042	NCOR2	4.03712e-05	0.638878	CERCAM	7.60266e-13	2.50508	GALNT1	1.19131e-13	1.65078	ATP1B1	6.16138e-14	1.51987	UNC80	0.200286	1.86251	VDAC1	0.000333731	2.17891	SELENOU	6.8325e-05	1.54234	CLPTM1	0.033832	2.84534	STEAP3	4.24209e-07	7.92883
47	HMGN4	0.000113385	0.211065	VAV3	1.9512e-18	1.80812	JARID2	1.45654e-07	0.750576	ANP32B	4.51009e-07	0.357318	B2M	5.55756e-05	0.794989	HSPA5	6.51206e-13	0.69104	STMN1	4.97489e-13	0.694152	JUP	6.96401e-14	1.76285	GABRD	0.2006	2.37194	TMSB15B	0.000372736	0.429909	GLO1	6.77031e-05	1.08333	GJA1	0.0348968	0.424852	FRRS1	4.82801e-07	5.23465
48	HOXD11	0.000128608	0.699721	PLAC8L1	3.32406e-18	2.65497	SALL1	1.79334e-07	0.659503	HOXB8	4.87234e-07	1.6563	SCGN	6.1417e-05	1.91407	TIMP3	1.22162e-12	1.85671	SRXN1	8.8156e-13	3.22667	DSP	1.33092e-13	4.02281	CSMD3	0.200843	1.56003	AXIN1	0.000388175	1.40921	OPTC	7.25601e-05	2.5869	THPO	0.0373824	4.34409	RPL23A	2.49631e-07	1.10986
49	BASP1	0.00016615	0.389218	EIF3E	2.29052e-17	0.815792	RBM38	1.86833e-07	0.912448	SNX10	5.58386e-07	2.26285	PLIN4	6.26633e-05	0.705824	VCAN	1.4381e-12	1.33119	LEF1	8.18898e-13	1.56971	NBL1	8.44194e-14	1.82978	NIPA2	0.202779	0.533571	KPNA3	0.000523773	0.812377	PTP4A1	7.23685e-05	0.971057	CLEC19A	0.0369422	0.680631	EIF5A2	3.27228e-07	1.12162
50	UNC5C	0.000168591	1.42229	TNFSF10	2.67622e-17	1.2986	SLC18B1	2.9614e-07	1.05037	LDHB	8.50605e-07	0.33457	SEPT9	7.51782e-05	0.555259	NMRK2	2.12546e-12	1.8035	COL5A1	1.10363e-12	1.73555	COL14A1	5.60888e-13	4.76241	GRIA3	0.206981	2.34952	TYRO3	0.000545325	1.56498	FZD4	7.74317e-05	2.83567	GSC	0.0420885	4.242	SOD1	3.71958e-07	1.65009
51	GPX3	0.000184668	1.78538	YRDC	3.52429e-17	1.07586	IL17RD	3.41772e-07	1.08532	MSGN1	1.82143e-06	0.732572	RTF1	7.7608e-05	0.546149	ID3	2.03976e-12	0.938193	GLIPR2	1.35116e-12	2.13416	CNN3	2.96267e-13	1.20258	TARBP1	0.208811	0.971473	DMD	0.000606772	1.01654	DPYS	7.83427e-05	2.81411	COL8A1	0.0431234	2.33974	CA2	7.66586e-07	3.86185
52	SEPT9	0.000189032	0.411156	R3HDM1	7.56145e-17	1.62817	BTG2	3.78087e-07	1.18706	CD3E	2.75185e-06	1.7252	ZEB2	8.09854e-05	0.836948	ANP32B	2.95393e-12	0.547635	COX7C	1.87327e-12	0.722602	TP63	6.32343e-13	3.99012	KHK	0.209085	2.31285	CXCR4	0.000785319	1.30195	DUSP1	8.65413e-05	2.46099	ITPK1	0.044256	1.15683	AP2M1	4.8133e-07	2.18272
53	ARID3A	0.000206643	0.385793	MAP1B	7.62136e-17	1.31682	SIK1	4.26863e-07	1.55031	SALL1	3.27151e-06	0.628375	SST	8.28316e-05	1.68939	PGAM1	3.88722e-12	0.585488	SDC4	5.1791e-12	2.47362	CLDN1	3.39798e-13	1.32674	LGALS1	0.20969	1.34393	TJP2	0.00080249	1.21298	CCNI	8.91915e-05	0.984484	NFASC	0.0481648	1.11489	ACADL	1.80397e-06	2.65775
54	DDR2	0.000231976	1.46219	PPAT	9.92254e-17	1.18033	HDGFL3	1.12309e-06	0.93728	HOXA5	9.9176e-06	1.0061	CACNG3	8.9924e-05	0.801109	TMEM132C	5.51779e-12	2.0766	KDELR2	6.95727e-12	1.051	PABPC1	5.46599e-13	0.844885	MTHFD2L	0.210744	1.92106	FIBIN	0.000894355	1.24648	EEF2	0.000100464	0.361376	PCDHGA2	0.0482952	1.17131	CLOCK	3.44007e-06	7.28801
55	Meis2a.2	0.000294216	0.553975	SGK1	1.23459e-16	2.1461	SDC3	1.30752e-06	0.803527	HOXC9	1.44458e-05	0.931856	TCOF1	0.000107521	0.49528	LDHB	5.06606e-12	0.497988	CDON	1.62233e-11	2.58614	LASP1	7.4564e-13	1.41605	MAP1A	0.215584	0.924973	STX7	0.00103092	1.64345	PRDX1	0.000115397	0.527665	CBLB	0.0511797	1.77946	AHCYL1	2.29969e-06	2.98274
56	DCN	0.000362448	1.1252	NAP1L1	1.74866e-16	0.541313	LSAMP	1.3374e-06	1.24373	COMTD1	1.45558e-05	1.3537	NFASC	0.000113379	1.16994	STMN1	6.72853e-12	0.522992	HPCAL1	2.9476e-11	2.0527	COBLL1	1.23993e-12	3.09382	DNAH1	0.220807	1.47166	PABPC1	0.00102037	0.430143	SCD5	0.000124616	1.0335	FRMD3	0.0519371	2.38983	S100A10	1.96141e-06	2.40864
57	ID3	0.000371657	0.361431	AIG1	2.66269e-16	1.76605	PPM1E	1.44675e-06	1.86292	HOXA11	1.63536e-05	0.722007	TWIST1	0.000114191	0.851257	CHD7	7.11139e-12	0.859847	TMEM47	7.37992e-11	3.09128	DDT	1.17253e-12	1.64567	TRIM7.2	0.221715	2.17917	STK17A	0.00110576	3.71481	RACK1	0.000141499	0.416147	HSP90B1	0.0522107	0.454859	UBE2H	1.70849e-06	1.96315
58	GATA5	0.000379531	0.647633	HSPE1	3.36729e-16	0.577298	gga-mir-1723	1.99908e-06	1.40664	COL4A1	1.75204e-05	1.19504	BHLHE22	0.000117863	1.72832	HOXC9	1.0461e-11	1.52215	HSP90B1	6.51626e-11	0.942405	DBNDD2	2.07598e-12	2.52035	CFAP99	0.222963	1.74062	CDX4	0.00116057	1.00053	DPYSL2	0.000146876	0.851031	ADGRL2	0.0556425	0.591928	TOMM6	1.63631e-06	1.43892
59	PPID	0.000403605	0.343103	SALL4	3.90723e-16	0.73687	JCAD	2.1982e-06	0.931441	ADD3	1.7578e-05	0.425614	LMO2	0.000118963	1.81685	ID4	1.19602e-11	1.17611	PLOD2	1.28001e-10	2.06542	TUBAL3	2.22333e-12	2.02365	N4BP1	0.226692	0.537252	TTPAL	0.00118051	1.97675	PCBD1	0.000171453	1.04383	THBS4	0.0563283	1.5808	SPTAN1	2.3809e-06	2.22592
60	PITX2	0.000415004	1.1057	ZFYVE19	5.33495e-16	1.26972	MTURN	4.06255e-06	1.58812	ARID1B	2.34856e-05	1.03573	PCSK5	0.000120176	0.960873	GAPDH	1.44663e-11	0.377307	RASA3	1.41668e-10	2.34812	RPS15A	2.16826e-12	0.742391	ETS1	0.226957	0.918523	VPS26A	0.00123076	0.831365	TNFRSF21	0.000183172	1.79861	TAC1	0.0591217	3.59677	NCOA4	2.45351e-06	2.15173
61	SERPINF1	0.000429469	2.3251	STK26	5.38889e-16	1.14244	SLC2A1	4.79672e-06	0.789126	PCBD1	2.97037e-05	0.653553	ROCK1	0.000121361	0.690242	MYLK	1.79241e-11	2.29132	RDH10	1.72954e-10	1.69679	RPL29	3.02363e-12	0.709764	MAP3K12	0.227713	3.27146	WEE1	0.00132125	0.791713	GLCCI1	0.000182262	1.03226	HSPA5	0.0588642	0.342624	MCRIP2	3.33378e-06	2.90775
62	CDC42EP4	0.000461191	0.631907	KPNA2	5.95133e-16	0.871412	COL5A1	4.91593e-06	0.852057	TMEM123	3.5708e-05	0.772476	JCAD	0.000149185	0.834177	AZIN1	1.8497e-11	0.928896	STRA6	3.60798e-10	1.64072	KRT18	3.95171e-12	1.98556	MATK	0.227713	3.27146	ARHGAP29	0.00137161	1.43889	TPM4	0.000183381	0.887701	FLT4	0.0600709	1.67455	EAF2	3.16552e-06	2.58658
63	UNC5B	0.000483617	0.720386	MYL9	6.40258e-16	1.06579	CORO1C	7.16943e-06	0.542166	SP5	4.38852e-05	0.575505	CADM1	0.0001531	0.72553	NREP	2.04506e-11	1.23199	CD38	5.52194e-10	3.27095	SPARC	3.60999e-12	1.43468	CYP2AB2	0.227713	3.27146	CNN3	0.00137301	0.642539	IDH1	0.000186737	1.39019	EML4	0.0608615	2.2145	AOC1	5.78107e-06	9.0283
64	LRRC20	0.000555228	0.564074	EIF3M	7.07853e-16	0.621604	APLNR	8.22787e-06	1.48193	MID1IP1	5.14569e-05	0.854852	NPM3	0.00016973	0.308941	COL5A1	2.72992e-11	1.41311	RIPPLY2	5.97651e-10	4.11258	NEK6	4.332e-12	1.811	GJB5	0.227713	3.27146	BLNK	0.00141264	2.81519	IGFBP2	0.000233444	0.972715	DRD4	0.0641197	1.96593	REEP1	4.45884e-06	3.60958
65	CCT5	0.000592629	0.216999	SAP30	1.0344e-15	1.34113	RAB30	9.1636e-06	0.933418	ID4	5.85193e-05	0.657758	TAL1	0.000213568	1.9228	JUN	9.79615e-11	1.7101	ALDH1A3	7.94982e-10	4.36724	CLDN3	9.80435e-12	3.39787	JAG1	0.227743	1.68795	CMIP	0.0014296	1.41977	CDK6	0.00023568	1.10908	XIAP	0.064701	1.54394	HAGH	5.28594e-06	4.99307
66	MAD1L1	0.00061506	0.565042	PSMA5	1.03172e-15	0.816433	POSTN	1.14972e-05	1.25565	AXIN2	5.92678e-05	1.30419	GATA4	0.000223339	1.62402	PAK1	1.41295e-10	1.6944	CITED4	7.63256e-10	2.37416	TPT1	9.81968e-12	0.664224	GTF2E1	0.228561	0.449818	GSG1	0.00153742	4.81025	TXNDC5	0.000261696	0.978524	RAMP2	0.0698919	4.27923	SERBP1	3.21334e-06	0.901309
67	SVIL	0.000618667	1.01639	GPX1	1.18298e-15	0.980108	FGF10	1.51694e-05	1.6992	SKAP2	6.21699e-05	0.485286	MEX3A	0.00022568	0.473052	HOXA7	2.01761e-10	1.0518	SLC35G2	8.04175e-10	2.49353	TTC39A	2.90688e-11	2.81552	AMMECR1L	0.230373	1.69771	DAP	0.00152316	1.41918	MAFB	0.000271044	2.08959	FLOT2	0.0714413	0.936746	chPKCI	3.78294e-06	1.49671
68	TCP1	0.000669737	0.260468	POLR2E	1.57479e-15	0.840116	NEBL	1.56733e-05	1.67442	BAMBI	6.40434e-05	0.69505	TMSB4X	0.000270379	0.282747	TXN	2.46185e-10	0.547669	FGFRL1	1.04784e-09	3.45066	CIRBP	2.24874e-11	0.734834	STIP1	0.230436	1.05248	EOMES	0.00164059	1.92191	ATP5A1Z	0.00026235	0.514098	NTM	0.0714321	0.821082	BLVRA	7.61257e-06	4.74351
69	gga-mir-6708	0.000680813	0.974443	TOMM20	1.72502e-15	0.674971	PTTG1IP	1.7971e-05	0.817383	VAV3	6.98847e-05	0.978186	SP5	0.000282341	0.543784	PLEK2	3.20044e-10	2.67579	OLFML3	1.19335e-09	2.31258	ARF1	3.15428e-11	0.97057	ENPP3	0.230752	2.14515	DAB2	0.00167445	2.85685	UBE2H	0.000299871	0.976312	OSBPL3	0.0743867	2.75791	VDAC2	4.44586e-06	1.20612
70	NOG	0.000703725	1.19684	C1QBP	1.73728e-15	0.579932	GAS6	1.98129e-05	1.5118	DHX37	8.50693e-05	0.549187	KLHL9	0.000329258	0.816241	SELENOU	3.26247e-10	1.49788	ARHGDIB	1.8926e-09	1.19392	GNG4	5.93398e-11	4.46691	SLC26A4	0.232639	2.09165	PTBP1	0.00165282	0.49951	HOXC12	0.000314033	1.97666	MCAM	0.0756736	0.863146	CIAPIN1	5.60295e-06	1.79825
71	FARP1	0.000794673	0.407463	SLC34A2	4.08559e-15	2.45131	ZNF503	2.04222e-05	0.886324	MPZL2	9.15861e-05	1.568	ATP6V0D1	0.00037481	0.635059	FUBP1	3.72646e-10	0.697085	QPCT	2.01922e-09	1.488	PHLDA2	5.49443e-11	2.04546	OBSL1	0.232639	2.09165	SNAP23	0.00173444	1.05013	GREB1	0.000328225	1.33903	G0S2	0.0764894	2.92938	HEBP1	9.26234e-06	4.32717
72	OAF	0.000837018	0.555987	UMPS	5.59731e-15	1.08574	RGS2	2.38365e-05	1.66718	BRSK2	9.52967e-05	1.23445	CDC42EP4	0.000376972	0.827842	TUBB2B	4.35207e-10	0.656852	FMOD	2.89256e-09	3.61119	TSPAN13	5.85522e-11	1.88618	HMGA1	0.232639	2.09165	DAPP1	0.00191626	2.14746	HNRNPA1	0.000333574	0.457391	TRARG1	0.0784406	1.24373	UHRF1	5.81127e-06	1.61184
73	PLPP3	0.000954592	0.556459	PKM	5.84564e-15	0.425645	RALY	2.42419e-05	1.48035	IGF1R	0.000106822	0.602708	KCNA3	0.000379746	1.63913	TCF7L2	6.24604e-10	1.22138	ALCAM	2.82382e-09	1.96634	GSTT1	1.72579e-10	3.40796	MLH1	0.235797	1.24611	MOSPD2	0.0019428	1.75848	ADH5	0.000339501	0.713318	SDC2	0.0788456	0.910293	RPL29	5.81143e-06	0.965458
74	BRINP1	0.000988009	1.25811	IPO5	5.99057e-15	0.72931	WDR36	2.46507e-05	0.634404	NPM3	0.000111388	0.303672	AWAT1	0.000399981	2.18386	PTTG2	6.9172e-10	0.907183	PLPP3	3.17407e-09	1.56973	FGF12	1.82818e-10	2.94393	SLC35E2B	0.238646	0.962485	MPZL3	0.00194726	0.997939	SCOC	0.000374203	1.37478	DNAJC3	0.0799639	0.729323	INHA	1.07562e-05	5.11501
75	CYP51A1	0.00103593	0.570141	HK1	1.2832e-14	1.01024	SGPL1	2.54276e-05	0.720045	RIPK2	0.000128782	1.77236	XKR8	0.000404579	1.4076	SPAG9	9.88566e-10	1.90095	NCAM1	3.16038e-09	1.37091	ZNF706	1.44351e-10	1.14966	SOUL	0.24038	1.1197	KIAA1522	0.00225521	1.27606	PPIA	0.000376941	0.390896	CTSV	0.0803947	0.560466	HK2	8.64684e-06	2.69601
76	COL6A3	0.00106787	1.15493	HDLBP	1.48246e-14	0.811856	TMEM120A	2.68099e-05	1.45372	RALY	0.000138061	1.4082	ABCD4	0.000469155	1.14024	HSPH1	1.10096e-09	1.14165	EBF2	4.78712e-09	3.34742	SERPINH1	1.63643e-10	1.75062	SH3RF1	0.241552	2.0428	NAXD	0.00232616	1.45206	FSTL1	0.000411078	0.871185	MNX1	0.0805202	1.51549	GLRX5	7.29787e-06	1.84868
77	SS18L1	0.00111236	0.394909	NPEPPS	1.56341e-14	1.00376	SUSD1	3.11151e-05	1.303	LYPD6B	0.000138066	1.37372	NDP	0.000509593	0.913019	MTAP	1.31857e-09	1.3729	EBF3	6.38509e-09	2.42282	EPCAM	1.61522e-10	1.44465	OPHN1	0.242999	3.00837	CLDN3	0.00245825	1.82824	SPARC	0.000412443	0.907162	LY86	0.0855545	2.16941	ENPEP	1.32188e-05	8.6218
78	HK2	0.00114963	0.608897	CYCS	2.69741e-14	0.640462	LLPH	3.16966e-05	0.535234	B3GNT7	0.000281529	1.57438	PARP1	0.000547753	0.353655	CRYAB	1.51027e-09	2.15492	DLL1	6.41815e-09	1.2209	CPM	2.26758e-10	3.66487	EDCH2	0.242999	3.00837	TUBB6	0.00272679	1.51954	RPL26L1	0.000422772	0.393061	GLRX	0.0898181	2.18524	RPL35	8.16811e-06	1.08726
79	EFNB1	0.00116412	0.616118	PDCD4	3.09667e-14	0.786461	WLS	3.34207e-05	0.433315	HOXD11	0.000281762	0.796415	ZFPM1	0.000689597	1.18146	TOP2A	1.39714e-09	0.679236	CALM1	9.77333e-09	0.747811	ATP6V1G1	1.62016e-10	0.939536	ASIC4	0.242999	3.00837	SLITRK4	0.00278499	3.68904	RDH10	0.000439892	1.40404	FAM110B	0.0910383	3.17121	COLEC12	1.19964e-05	2.42868
80	GLB1	0.00172507	0.809124	SSBP2	3.48483e-14	1.89626	MKP3	3.45161e-05	0.715676	LRP11	0.000289312	0.704345	BF2	0.000719875	1.84347	CYR61	1.52136e-09	1.44119	GMDS	1.09263e-08	1.82003	PERP1	2.53232e-10	4.38599	RAB17	0.242999	3.00837	LGALS2	0.00281937	3.76674	DBNDD2	0.000451474	1.66826	PHLDA2	0.0948794	0.900448	NFE2L2	1.43479e-05	3.22448
81	OPTC	0.00202626	1.0646	PAICS	5.4155e-14	0.822545	CERK	3.97397e-05	1.16138	GCNT1	0.000319461	1.37776	HSPA8	0.000757923	0.231186	MAPRE2	1.72916e-09	1.23345	CAPZB	1.49451e-08	0.817695	DYNLL2	2.15734e-10	1.93264	SIPA1	0.243797	2.00912	GJB1	0.00314316	1.76132	ZNF521	0.000451866	1.42595	ANXA6	0.0952412	0.82768	NRBP2	1.93941e-05	5.21577
82	GAPDH	0.00204372	0.12928	IVNS1ABP	8.1228e-14	1.26502	KLHL9	4.24675e-05	0.836152	SAT1	0.000376809	0.819404	FN1	0.000847027	0.454866	HOXD11	2.43929e-09	1.35507	chPKCI	3.18598e-08	0.843593	KRT14	3.04512e-10	4.53836	IGF-I	0.243797	2.00912	AP2M1	0.00326274	0.72021	ALDH1A2	0.000462229	1.18809	IGFBP5	0.0969469	3.04936	APRT	1.71873e-05	2.5504
83	SPC25	0.00204905	0.412755	ZDHHC6	8.43796e-14	0.98388	PDZRN3	5.10586e-05	1.52085	HOXB5	0.000382748	0.618923	APLNR	0.000902951	1.23717	ACTG1	2.69215e-09	0.417286	SOD1	3.27848e-08	0.770504	angiopoietin-2	2.9801e-10	3.12007	SECISBP2	0.249744	1.09488	PKD2	0.00344074	1.91794	ENO1	0.000465457	0.427506	ADRA2B	0.0968989	1.81346	SLC9A3R2	2.22507e-05	3.65761
84	GARS	0.00235056	0.322496	MT4L	8.83809e-14	1.10083	LSP1	6.19016e-05	0.731153	PALD1	0.000439138	0.31438	GM2A	0.000909906	0.707401	PRRC2C	4.28158e-09	0.647423	LIMD2	5.52493e-08	1.38481	TFAP2B	4.27579e-10	5.52947	SFTPA2	0.252839	1.96295	SLC25A20	0.00351212	0.882643	BZW2	0.000501046	0.663906	PTPA	0.0977885	0.694397	NECAB2	2.67531e-05	7.01153
85	SPRED1	0.00237755	0.654437	EIF3H	8.96346e-14	0.583189	MVK	6.25484e-05	0.678609	SLC16A1	0.000460344	0.373516	RASSF2	0.000931357	1.97189	HOXD4	4.73762e-09	1.28189	JUN	1.0684e-07	1.77132	EMX2	3.95824e-10	4.04912	BCO1	0.253349	1.33218	CTSC	0.00351512	0.864962	RPL29	0.000509373	0.442376	PRNP	0.0986569	2.00755	NARF	2.32811e-05	3.89751
86	TCF12	0.00311076	0.249033	PRELID1	9.5741e-14	0.655226	LPAR1	6.32593e-05	0.985071	EDEM2	0.000528303	1.07221	HAS2	0.000927614	0.774858	GDPD4	5.7382e-09	4.75365	MPDZ	1.27126e-07	1.47282	MPZL3	3.35011e-10	1.66316	PXK	0.256225	1.06806	FKBP4	0.00354617	0.490315	QDPR	0.000527453	1.46558	DRAM1	0.0986569	2.00755	FOS	2.44816e-05	3.93844
87	JCAD	0.00315619	0.514549	UBE2D3	1.10951e-13	0.711153	CD3E	6.411e-05	1.39872	gga-mir-1723	0.000593142	1.11228	LAMB1	0.00110568	0.422114	GLCCI1	6.84652e-09	1.00003	EYA2	2.45308e-07	3.0215	CD44	5.4616e-10	4.80008	MAPKAPK5	0.257544	0.91721	RFXAP	0.00356865	0.795789	DYNLT1	0.000529221	1.02026	STMN2	0.0990638	2.3978	METAP2	1.59116e-05	1.43142
88	NR2F2	0.00317596	0.635716	NSG1	1.38417e-13	1.03343	WIF1	7.08136e-05	1.71292	STMN1	0.000643567	0.244439	PDZRN3	0.00112527	1.32347	DBNDD1	8.86346e-09	1.80618	STBD1	2.65603e-07	3.17335	APP	4.67486e-10	1.6113	GPR143	0.258656	2.78591	PNRC2	0.00366632	0.633478	HMGN4	0.000540099	0.420599	FGF8	0.100805	1.26252	DAB2	2.75434e-05	5.4054
89	DOK4	0.00318629	0.751983	DUSP19	1.59594e-13	1.25584	CFD	0.000117552	1.483	BIRC2	0.000710558	0.64078	ACTB	0.0012081	0.166731	RASL11AL	9.75806e-09	1.91269	HMGN1	2.34131e-07	0.798327	TRARG1	5.81928e-10	2.67436	APOA1	0.262864	0.627583	GJB6	0.00373495	2.08492	PNRC1	0.00061362	0.672099	P4HA3	0.102473	2.35114	TMEM183A	1.91156e-05	2.16289
90	SEPT11	0.00360796	0.807986	EIF4G2	1.80621e-13	0.424332	CRISPLD2	0.000173668	2.11273	KIF5C	0.000814643	0.712174	ARHGAP8	0.00128672	1.19726	GRAMD4	1.00305e-08	2.01684	TBL1XR1	3.38036e-07	0.906785	EEF1A1	4.88522e-10	0.482698	HACD1	0.263296	1.30962	HSPE1	0.00413693	0.401784	RPL23A	0.000672025	0.42875	BSG	0.105437	0.694102	SNX5	2.61315e-05	4.03733
91	HSPA8	0.0043556	0.14989	ABCE1	1.89365e-13	0.688939	ERO1A	0.000231199	1.064	LMO4	0.000844655	0.431021	NKAIN4	0.00150022	0.682415	HOXD13	9.99003e-09	1.87904	NUCKS1	4.59736e-07	0.539829	CTDSPL	8.39672e-10	1.8205	PPP6R2	0.264571	1.94981	COTL1	0.00458871	0.65501	RPL37A	0.000702641	0.468057	NUCB2	0.106862	0.587533	SLIRP	1.80574e-05	1.5795
92	HPDL	0.004539	0.947355	TFDP1	2.14097e-13	0.977503	SPOP	0.000252116	0.712265	ASB13	0.000864164	0.823955	DRAXIN	0.00152075	1.01666	AK1	1.07521e-08	1.47301	TSKU	6.01598e-07	2.17513	ACTB	8.80794e-10	0.481477	USP33	0.26547	1.1658	PTX3	0.00474523	3.24345	USMG5	0.000724439	0.727616	SLC9A3R2	0.107541	1.20984	COX17	2.78794e-05	2.5983
93	COA7	0.00455302	0.472818	SUCLG2	2.31793e-13	0.987322	NUCKS1	0.00025742	0.272958	CTNNB1	0.00091412	0.292769	DKK3	0.00164181	0.647062	GDF2	1.34387e-08	4.35274	ACTG1	6.07596e-07	0.431486	NANOS1	1.26312e-09	4.08735	PTPRU	0.266793	1.85699	ZBTB7C	0.00484459	4.78895	CDKAL1	0.00074192	1.49133	AFAP1L1	0.110784	2.21821	ODC1	3.14239e-05	1.75862
94	MSL1	0.00496168	0.555703	YWHAQ	2.28457e-13	0.505932	P4HA2	0.000261091	1.27108	NUP205	0.000918817	0.475203	LONP1	0.00166511	0.473381	EEF2	2.23987e-08	0.31816	EIF5B	7.34908e-07	0.684981	HNRNPA3	1.03105e-09	0.690616	PLXND1	0.266793	1.85699	TP53BP2	0.00473788	0.90559	PTTG2	0.000746109	0.810053	ASIP	0.114681	2.69685	FAU	3.03876e-05	0.864008
95	BBOX1	0.00508037	0.841064	THY1	2.87621e-13	2.17031	ZNF609	0.000272191	0.711366	UNG	0.0010855	0.544471	RASGRP1	0.00174984	1.69851	CHCHD10	2.43416e-08	0.817034	COL8A1	8.5542e-07	3.99548	STMN1	1.06837e-09	0.665372	WDR7	0.271917	2.67009	PI4K2B	0.00490289	1.09753	FAM168B	0.000779742	1.11907	TIRAP	0.115379	1.08967	BTF3	3.1477e-05	1.16311
96	KDR	0.00509599	0.954454	ASTL	3.37521e-13	2.42811	KCNJ5	0.000563602	1.53418	PIK3R5	0.00113091	1.70692	SFRP1	0.00181224	1.04309	SERBP1	2.84776e-08	0.363751	CDV3	8.4465e-07	0.760389	RARB	2.02707e-09	2.93263	PPP4R1	0.271923	1.13026	TPM1	0.00519115	0.585105	RUNX1T1	0.000937289	2.41114	SPR	0.115834	0.760701	ARHGEF39	4.42686e-05	3.04337
97	MAPRE2	0.00524683	0.458177	TGIF1	3.19947e-13	1.14199	TUBAL3	0.00056617	0.674117	SLC2A1	0.00114311	0.59915	CGNL1	0.00188819	1.14453	THBS1	3.26505e-08	2.12652	COL6A3	1.10771e-06	2.56647	GPX8	2.71682e-09	2.58815	MSGN1	0.272716	0.274998	RARRES1	0.005551	1.76694	GP1BB	0.00099452	5.81381	SLIT3	0.121507	1.26555	RPS16	3.57227e-05	0.877557
98	PTGS1	0.00526799	1.09395	CAPRIN1	3.2472e-13	0.749396	PPP2R3C	0.000618778	1.20543	HOXD4	0.0012147	0.681086	TMEM37	0.00190593	1.6414	ZEB2	3.83493e-08	1.16935	ATOH8	1.20016e-06	2.59178	CARMIL1	2.88757e-09	2.11249	ANKRD55	0.273909	1.46524	TNNC1	0.0065441	0.877262	HSDL2	0.000965175	1.28336	SFRP1	0.122364	0.996646	EPB42	5.88071e-05	7.4524
99	H2AFZ	0.00538283	0.204766	ANO3	3.6863e-13	1.65645	GRTP1	0.000861705	0.929401	MKRN1	0.00128771	0.481627	MAPKAP1	0.00215695	0.751046	CMTM8	4.19099e-08	1.02787	HES4	1.20919e-06	0.976448	SH3BGRL3	2.95727e-09	1.23692	gga-mir-6659	0.274664	2.59321	UGT1A1	0.00689501	4.97655	TBCA	0.000961415	0.690221	LAPTM4B	0.124596	2.58385	YBX1	3.66999e-05	0.711616

## Sheet: Chick_Subset (Figure 3H)
Rank	PSM	pvals	log2foldchanges	NMP	pvals	log2foldchanges	Neural	pvals	log2foldchanges	Somite	pvals	log2foldchanges
0	MSGN1	2.9321e-94	2.58947	TBXT	4.53953e-161	3.01978	HES5	1.31212e-132	5.04315	MEOX1	3.10802e-139	4.22298
1	FGF18	8.92208e-43	1.54634	APCDD1	3.33293e-44	2.41414	PMP22	3.08565e-67	4.41331	TCF15	7.75913e-107	4.63282
2	HAPLN1	1.85557e-28	1.88216	MSX1	1.34191e-35	1.54998	GBX2	4.38895e-52	3.04044	SHISA2	1.08203e-85	4.37147
3	PPFIBP1	1.05956e-23	1.01174	RASGRP3	7.52349e-35	2.29284	RHOB	5.28886e-47	2.7129	NBL1	2.06134e-61	3.57841
4	CLEC19A	2.07942e-21	1.2706	FGF19	4.443e-32	2.97262	COTL1	1.20537e-38	1.67376	NPY	1.18047e-56	5.58701
5	DLL1	7.06412e-21	1.0823	CLDN1	2.99383e-32	2.34024	VIM	1.60982e-37	1.78838	TMSB4X	2.43911e-39	1.25438
6	TMEM100	1.89047e-18	1.57805	WNT8A	1.78116e-26	3.10076	MARCKSL1	9.12267e-31	1.3864	RHOU	4.08824e-32	2.41327
7	RNH1	3.30526e-14	0.844461	GJA1	6.99114e-27	1.03546	SFRP2	1.01654e-26	2.38772	COLEC12	5.51389e-31	2.43901
8	CDH2	4.89301e-14	0.579398	WLS	4.71758e-25	1.07704	APOH	3.80269e-26	5.9469	SMOC1	9.78564e-28	1.8144
9	RSPO3	1.38738e-11	1.59726	HOXA7	6.545e-24	1.48285	ENO1	6.60685e-23	0.644121	MPP6	1.78404e-27	2.08503
10	CADM1	4.46535e-11	1.04008	PLPP1	2.04008e-22	2.01654	CTGF	3.14065e-22	3.03358	GPC4	2.07697e-27	2.10507
11	ADGRL2	5.97173e-10	0.881643	WNT5A	1.6693e-20	1.12609	RASL11B	5.79822e-21	2.71488	TWIST1	7.19594e-25	3.59461
12	LRIG3	6.2931e-10	0.932996	EPHA1	2.98999e-20	3.14289	TUBB4B	1.38322e-19	0.920001	CYP1B1	3.14198e-22	3.86351
13	C10H15ORF59	1.26977e-09	2.37242	CD99	1.51251e-19	1.85377	PODXL	1.17077e-18	2.4472	ANXA5	1.59001e-22	1.99588
14	MDK	2.84302e-09	0.543064	BAMBI	7.18576e-19	1.85792	HOXA11	1.40394e-18	1.30384	NOTCH1	1.6024e-22	1.42791
15	PCP4	8.26234e-09	1.22905	Wpkci-7	3.4515e-18	1.41685	FABP6	3.36009e-18	4.3034	DCBLD2	4.40458e-22	1.62311
16	MAD1L1	1.08653e-08	1.05016	CHST15	1.42174e-17	1.24124	ACVR2B	1.61175e-18	1.36861	FABP5	1.63581e-21	2.50426
17	OSBPL5	1.6271e-08	1.5102	NKAIN4	3.35387e-14	1.60755	TUBA1B	4.14707e-18	0.461001	FSTL1	2.14111e-21	1.55605
18	ALDH1A2	2.07212e-08	1.27302	WNT5B	1.06165e-13	1.68781	PAX6	1.62567e-17	4.80875	POSTN	2.16371e-20	2.8981
19	MKP3	2.31206e-08	0.999178	EPCAM	8.43807e-13	1.83828	GNG10	4.11873e-17	1.54849	NR2F2	4.42319e-20	2.89637
20	DHX37	3.06856e-08	0.670982	APBB1IP	8.60917e-12	3.11189	NREP	4.04215e-16	1.46872	ID3	3.74815e-20	1.53336
21	OLFM1	6.67415e-08	1.09197	SP5	4.67705e-11	0.976821	HES4	5.24774e-16	1.2517	IGSF21	3.87063e-19	4.59546
22	LEF1	6.63813e-08	0.768884	MPZL3	1.30605e-10	2.09764	WNT4	1.7674e-15	5.13709	MMD	2.42881e-19	1.77699
23	AKAP12	7.31046e-08	0.585915	DRAXIN	2.29337e-10	2.04381	NDRG1	1.52343e-15	3.08509	RNH1	4.01461e-18	1.36133
24	ARHGDIB	9.04847e-08	0.677098	WNT3A	2.42658e-10	1.85111	FAM181A	6.92901e-15	6.24336	SIX1	2.62086e-17	4.25794
25	JCAD	1.00776e-07	1.05917	VAV3	2.44206e-10	1.78578	GAPDH	7.24193e-15	0.405662	GADD45B	5.83114e-17	2.33405
26	GDF3	1.5417e-07	1.25573	AKAP12	2.34774e-10	0.725665	SP8	9.65916e-15	1.51198	TBX22	5.02236e-16	5.08812
27	APLNR	2.12549e-07	1.86789	ATP2B1	1.56447e-09	0.796821	GLIPR2	1.23424e-14	1.57998	PAX7	5.99277e-16	2.75362
28	FAM46A	3.4348e-07	2.27059	VRTN	1.83795e-09	1.53387	NCAM1	3.33485e-14	1.33854	RDH10	1.31949e-15	2.42242
29	SYNPR	4.88226e-07	1.73414	TESC	2.0622e-09	1.64582	ALDOC	3.10569e-14	0.62771	CDH20	2.69802e-15	3.56362
30	PRCP	7.93829e-07	1.38099	FGF8	4.6109e-09	1.85279	ID3	5.93747e-14	1.02489	GPC1	1.71203e-14	1.39956
31	SIK1	8.34975e-07	1.48565	ANXA2	1.00329e-08	1.84413	PDGFA	2.24084e-13	1.96803	LRIG3	3.36976e-14	1.5586
32	CORO1C	1.32866e-06	0.581059	B4GALT1	3.24605e-08	1.59927	ID1	3.0238e-13	1.03349	RASD1	1.18642e-13	4.31203
33	ACTN1	1.39701e-06	0.630219	ENHO	4.52935e-08	1.03859	LMO4	5.41493e-13	0.952288	TUBAL3	8.87074e-14	1.71367
34	LIMD2	1.40332e-06	0.851043	DLX5	5.88564e-08	1.90389	NMRK2	7.29099e-13	1.85888	DMRT1	4.25061e-13	3.27164
35	SGPL1	1.46996e-06	0.83746	C9orf3	1.06606e-07	1.99711	PLEK2	1.11467e-12	3.6855	LFNG	3.13145e-13	1.39101
36	ENHO	1.67453e-06	0.86859	GREB1	1.65406e-07	1.07006	MYLK	1.50033e-12	2.52713	CYR61	3.7642e-13	1.81298
37	LSAMP	3.93048e-06	1.16899	MID1IP1	2.1683e-07	1.14317	ID4	2.19848e-12	1.22673	PTN	5.7504e-13	1.28953
38	RBM38	3.93466e-06	0.768698	NPM3	3.279e-07	0.397146	VCAN	2.23635e-12	1.31204	LPAR1	7.76413e-13	2.09115
39	METTL6	8.40491e-06	0.65687	GAD1	3.46525e-07	1.63944	TCP1	2.80406e-12	0.691108	SUSD1	9.53819e-13	2.40433
40	TMEM120A	1.22358e-05	1.55141	EVX1	4.25641e-07	2.18135	CERCAM	5.44471e-12	2.31028	PLPP3	9.84196e-13	2.0914
41	PTTG1IP	1.33979e-05	0.827423	GCNT1	7.04933e-07	2.30305	HSP90AA1	9.51255e-12	0.598551	PPFIBP1	9.11038e-13	1.03323
42	SLC18B1	2.13085e-05	0.834953	HOXD12	1.36664e-06	0.716852	HMGN4	1.34923e-11	0.467253	GALNT1	2.50081e-12	1.52445
43	ZEB2	7.83173e-05	0.646167	SNX10	1.4591e-06	2.09596	HOXC10	2.71342e-11	1.03438	SRXN1	4.95935e-12	2.94378
44	NEBL	8.95263e-05	1.45543	ESRP2	2.85572e-06	1.36597	PAK1	4.33565e-11	1.75067	OLFML3	8.33138e-12	2.92516
45	BTG2	0.000119769	0.846544	COL4A1	3.43799e-06	1.30623	TUBB2B	4.23165e-11	0.688183	CDON	1.25601e-11	2.60351
46	TIMM50	0.000133643	0.584877	B3GNT7	3.62344e-06	2.35789	SELENOU	4.80353e-11	1.59107	TIMP3	5.04562e-11	1.82568
47	KLHL9	0.000151856	0.766864	SPRY2	3.92339e-06	0.974093	HOXB5	1.01961e-10	1.03567	MDK	6.92776e-11	0.836092
48	RGS2	0.000171238	1.40348	CACNG3	4.58674e-06	1.30787	SPARC	1.05468e-10	1.13323	CENPX	8.98563e-11	1.19749
49	RAB30	0.000190435	0.76647	HOXB8	7.46914e-06	1.40461	PKM	1.18193e-10	0.446553	SDC4	1.05328e-10	2.1846
50	SEPT9	0.000191581	0.520181	HOXB7	7.46374e-06	0.886544	SCD	1.20157e-10	0.901308	TMEM47	1.46775e-10	2.96509
51	PPM1E	0.000202417	1.27754	BMP2	1.37366e-05	2.16669	TMEM132C	1.48267e-10	1.83765	PCP4	1.66055e-10	1.85408
52	DCBLD2	0.000239178	0.463391	LRP11	1.84009e-05	0.859007	CDH11	2.17963e-10	2.09445	EBF3	1.9927e-10	2.9297
53	KRT19	0.000239771	0.658413	SDC3	2.36344e-05	0.681535	PTTG2	2.63692e-10	0.924436	HPCAL1	3.37304e-10	1.86562
54	WIF1	0.000248807	1.5111	CDX4	2.40315e-05	0.831099	FIBIN	3.95973e-10	2.38448	ALDH1A3	7.81358e-10	4.4027
55	COLEC12	0.000301254	0.583051	EIF3H	3.55722e-05	0.387524	HOXB7	5.84903e-10	1.3094	PLOD2	8.00947e-10	1.90926
56	ANXA5	0.000398259	0.546883	PRTG	4.53392e-05	0.507556	TMEM123	6.65562e-10	1.1116	CITED4	8.99408e-10	2.34735
57	LPL	0.000606088	1.09768	AXIN2	5.07316e-05	1.32455	UCH-L1	6.92145e-10	1.05582	FGFRL1	1.27911e-09	3.40512
58	GAS6	0.000731934	1.11543	CDX1	5.34673e-05	2.4345	GLCCI1	8.76072e-10	1.06595	KDELR2	1.58525e-09	0.899756
59	XKR8	0.000749236	1.40728	PLAC8L1	5.47073e-05	3.02161	PGAM1	9.63821e-10	0.503894	GMDS	2.05497e-09	1.95856
60	LSP1	0.000748461	0.599907	CTSV	5.61273e-05	0.655797	PDE6D	1.09035e-09	1.12637	QPCT	2.09599e-09	1.48177
61	MID1	0.000766881	0.605536	ARHGEF9	7.07749e-05	0.917089	HOXD13	1.96808e-09	1.97711	HSPA5	1.98103e-09	0.671644
62	MVK	0.000942536	0.546718	TPST1	7.59544e-05	0.54374	HOXD12	2.35455e-09	0.93057	CD38	2.81444e-09	2.92766
63	SST	0.000953795	1.98661	UCH-L1	8.15029e-05	0.62827	BTG1	3.101e-09	0.893491	RASA3	2.61967e-09	2.05724
64	ZDHHC20	0.000978871	2.55906	HEXB	9.37905e-05	1.00046	GDF2	5.02561e-09	5.02643	CA2	3.07913e-09	3.45421
65	LIN28A	0.00104954	0.894017	MT4L	0.000101251	1.1113	AZIN1	4.61041e-09	0.787458	ALCAM	3.52674e-09	1.93712
66	WDR36	0.0011844	0.474275	LEFTY2	0.000129946	3.80613	SPAG9	5.05282e-09	1.77475	RIPPLY2	4.56542e-09	3.4256
67	TMEM35B	0.00134958	0.567117	MPZL2	0.000127814	1.51807	TCF7L2	5.84867e-09	1.12986	EBF2	4.79461e-09	3.32594
68	MTURN	0.00137658	0.977624	SAT1	0.000131876	0.888174	MTAP	6.11961e-09	1.29067	FMOD	5.11233e-09	3.45015
69	PITX2	0.00140701	2.38613	ARL1	0.000136969	0.568223	GDPD4	7.15894e-09	4.59171	CALM1	1.03578e-08	0.73285
70	ERO1A	0.00154127	0.883486	CFC1	0.000151663	1.38169	LDHB	6.47464e-09	0.401946	TPM1	1.18084e-08	1.05423
71	NTM	0.00165291	0.700897	LYPD6B	0.000154635	1.35184	PTN	6.60426e-09	0.913432	CRIP1	1.85251e-08	4.088
72	FGF10	0.00198654	1.08543	CXCL14	0.000161337	1.33722	DBNDD1	7.67218e-09	1.81692	STBD1	3.06193e-08	4.01459
73	ISLR	0.00212738	1.33023	GATA2	0.000169055	1.47682	PSAT1	9.60035e-09	1.20672	RASGEF1B	7.21436e-08	2.34377
74	PLXNA2	0.00227163	3.17902	METTL6	0.000186234	0.590606	CMTM8	1.52552e-08	1.06832	SNAI1	8.47224e-08	3.35518
75	GNAI3	0.00248617	0.276022	ARHGAP8	0.000195298	1.40925	AP1S2	1.90833e-08	1.15572	LEF1	7.47745e-08	1.0809
76	CFD	0.00389207	1.01576	MYO1E	0.000251209	1.44573	YBX1	1.87292e-08	0.311403	EYA2	1.05421e-07	3.27858
77	ABHD4	0.00395761	1.0652	LGALS8	0.000255226	0.816467	MAPRE2	1.94926e-08	1.13181	SLC35G2	1.13074e-07	1.92231
78	MAP7D1	0.0042234	3.64824	ING5	0.000264545	1.19117	HOXA9	2.07518e-08	0.794982	CAPZB	1.39057e-07	0.748059
79	GRTP1	0.00445183	0.768311	MNX1	0.000283181	2.89741	CALM2	2.32393e-08	0.569177	STRA6	1.92044e-07	1.26725
80	CRISPLD2	0.0045525	1.38868	S1PR1	0.000346537	1.6871	CNN3	2.4406e-08	0.736897	TMEM100	2.21824e-07	1.29422
81	PPP2R3C	0.00549174	0.927129	MSX2	0.000357508	0.747029	HDGF	2.8988e-08	0.42557	Meis2a.2	2.86243e-07	1.2697
82	KCNJ5	0.00552008	1.15115	SPIN1W	0.000382318	2.33173	XPA	3.51576e-08	0.697319	COL6A3	4.98526e-07	2.74086
83	P4HA2	0.00753782	0.86105	ID4	0.000411995	0.57305	THBS1	3.96375e-08	2.09978	KANK1	5.1888e-07	1.50145
84	NOTCH1	0.00755293	0.286055	EDEM2	0.0004508	1.0842	TIMP3	3.9756e-08	1.28665	TPM4	5.18449e-07	0.897296
85	PDZRN3	0.00770581	0.890348	EDNRB	0.000496794	2.3469	SLC29A1	4.61528e-08	1.44728	PPID	6.59624e-07	0.793229
86	APLP2	0.00822815	0.253433	ST14	0.000534884	0.979742	ARL4C	4.54801e-08	0.888362	HSP90B1	6.6224e-07	0.691739
87	LLPH	0.00838238	0.330006	GLTP	0.000586635	1.59272	ZFHX3	5.92554e-08	1.42332	APLP2	7.12178e-07	0.663438
88	SMOC1	0.00926938	0.319466	ATP6V1B2	0.000707121	0.614055	CKAP2	6.39468e-08	0.641629	RNF11	1.21739e-06	1.2253
89	SP5	0.0102159	0.372987	MT3	0.000737024	2.06559	RASL11AL	1.30019e-07	1.67883	COL5A1	1.27839e-06	1.04869
90	PTRHD1	0.0103497	0.495214	AGTRAP	0.000769416	1.53071	CHD7	1.35265e-07	0.639087	COL8A1	1.52785e-06	3.6591
91	BRI3BP	0.0112909	1.3318	CTNNBIP1	0.000794281	0.785756	TXN	1.38554e-07	0.441528	COX7C	1.64981e-06	0.473752
92	MEIS1	0.0119697	1.31071	LDHB	0.00108957	0.211529	JUN	1.58135e-07	1.29072	HMGN1	1.83552e-06	0.726074
93	PNAT3	0.0126523	2.16885	JARID2	0.00121487	0.452258	ENKUR	1.68643e-07	2.65188	TSKU	2.18975e-06	1.99358
94	PVALB	0.0130542	0.72126	CD81	0.00133485	1.06658	TUBA1A	1.9721e-07	0.536332	NCL	2.76842e-06	0.387146
95	CXCR4	0.0132796	0.482992	KRT18	0.00144282	1.22581	DBX2	2.27952e-07	1.99012	CIRBP	3.30141e-06	0.438701
96	CD24	0.0134772	0.292568	ASTL	0.00148555	3.3514	GRAMD4	2.29351e-07	1.71085	MPDZ	4.61701e-06	1.21954
97	CABP1	0.013836	1.19484	TSPAN13	0.00152701	0.949103	DDT	2.30406e-07	0.97106	GLIPR2	4.84098e-06	1.14189
98	LOXL1	0.0139657	1.62853	KCNK17	0.00163616	3.12706	EMB	3.0235e-07	1.68341	ATOH8	5.63009e-06	2.27347
99	SEPT3	0.0142304	22.0348	PIK3R5	0.00164697	1.61748	CCDC14	3.60582e-07	1.57472	SPSB4	6.51689e-06	1.5683

## Sheet: Chicken Figure 4 
Rank	PSM	pvals_a	pvals	NMP	pvals_a	pvals	Neural_Tube	pvals_a	pvals
0	MSGN1	1.08818e-60	8.1763e-65	TBXT	1.7051e-76	1.28116e-80	HES5	1.2419e-125	9.3312e-130
1	MEOX1	9.74415e-55	1.4643e-58	RASGRP3	1.83664e-60	2.76e-64	VIM	6.30896e-31	9.95478e-34
2	RNH1	4.17128e-49	1.25367e-52	WNT5A	7.98987e-39	1.80101e-42	MARCKSL1	1.08798e-28	1.96195e-31
3	FGF18	4.13469e-45	1.55334e-48	MSX1	5.94264e-37	1.78605e-40	ENO1	1.72364e-22	1.07493e-24
4	PPFIBP1	5.43998e-41	2.45247e-44	APCDD1	5.12445e-35	1.92518e-38	RHOB	2.03163e-22	1.29753e-24
5	DLL1	8.55649e-33	4.50037e-36	CD99	7.29503e-26	3.83689e-29	CA2	2.32653e-22	1.52083e-24
6	TMEM100	1.6962e-27	1.01958e-30	WLS	4.78508e-23	2.8763e-26	PMP22	4.26023e-22	2.97694e-24
7	LRIG3	1.84277e-24	1.24614e-27	HOXA7	4.25556e-22	2.87775e-25	MPC1	1.67926e-21	1.66551e-23
8	HAPLN1	1.01102e-22	7.59649e-26	BAMBI	6.91945e-19	5.19908e-22	CDH15	2.37724e-21	3.46385e-23
9	COLEC12	1.83611e-22	1.51756e-25	GREB1	8.04534e-19	6.64954e-22	SFT2D2	2.37724e-21	6.52758e-23
10	CLEC19A	3.54617e-21	3.19739e-24	CHST15	8.18707e-17	7.38184e-20	YES1	2.37724e-21	9.718e-23
11	LIMD2	4.12338e-20	4.02765e-23	ARL1	1.87065e-16	1.82722e-19	PRR16	2.37724e-21	1.0478e-22
12	SMOC1	4.45297e-20	4.68417e-23	ANXA2	5.24108e-14	5.5132e-17	CDKN2B	2.37724e-21	1.43535e-22
13	ARHGDIB	9.17241e-18	1.1027e-20	WNT3A	6.26548e-14	7.06155e-17	UBASH3B	2.37724e-21	1.43535e-22
14	TCF15	6.19182e-17	8.37424e-20	METTL6	1.10129e-13	1.32397e-16	FAAP100	2.37724e-21	1.44296e-22
15	ANXA5	2.54256e-16	3.62977e-19	APBB1IP	2.41568e-13	3.08562e-16	APH1A	2.37724e-21	1.56357e-22
16	PCP4	2.74625e-15	4.53959e-18	MKRN1	3.1691e-13	4.28611e-16	IRF10	2.37724e-21	1.97951e-22
17	NOTCH1	3.56592e-15	6.16246e-18	TESC	4.49516e-13	6.41731e-16	WFDC2	2.39788e-21	2.03232e-22
18	LEF1	1.07238e-14	2.01439e-17	ARHGEF9	5.68313e-13	8.54028e-16	ACTC1	2.44794e-21	2.08945e-22
19	ACTN1	3.48106e-12	7.52786e-15	JARID2	1.02721e-12	1.62081e-15	KCNG1	2.62512e-21	2.39651e-22
20	ADGRL2	3.48106e-12	7.58515e-15	VAV3	1.34326e-12	2.32137e-15	SMAGP	2.62512e-21	2.39651e-22
21	NBL1	1.8546e-11	4.18047e-14	SDC3	2.24802e-12	4.05384e-15	ASS1	2.83863e-21	2.75779e-22
22	CORO1C	2.36806e-11	5.5158e-14	HEXB	4.10804e-12	7.79812e-15	ZBTB20	2.85407e-21	2.84601e-22
23	DCBLD2	3.61406e-11	8.68959e-14	FGF19	4.10804e-12	8.02532e-15	MDGA2	2.87952e-21	2.8851e-22
24	LLPH	4.31224e-10	1.10163e-12	GULP1	6.9726e-12	1.41453e-14	NAA10	2.89081e-21	2.96488e-22
25	CADM1	4.50897e-10	1.18577e-12	ENHO	9.6334e-12	2.02671e-14	AQP9	3.03108e-21	3.33077e-22
26	MDK	2.51114e-09	6.98116e-12	LGALS8	1.00903e-11	2.19865e-14	CACNA1H	3.10333e-21	3.50128e-22
27	OLFM1	1.15092e-08	3.3726e-11	FGF8	1.22165e-11	2.75373e-14	DPH7	3.10333e-21	3.5679e-22
28	GNAI3	1.1563e-08	3.47524e-11	MID1IP1	1.42005e-11	3.30766e-14	LMX1B	3.10333e-21	3.5679e-22
29	LSP1	1.2554e-08	3.87896e-11	ATP2B1	2.16959e-11	5.29069e-14	TMEM127	3.10333e-21	3.5679e-22
30	DHX37	1.2554e-08	3.96173e-11	COL4A1	2.16959e-11	5.37955e-14	GYPC	3.10333e-21	3.5679e-22
31	LSAMP	2.1278e-08	6.8747e-11	C9orf3	6.7243e-11	1.76836e-13	gga-mir-1553	3.10333e-21	3.5679e-22
32	RHOU	2.20723e-08	7.29719e-11	LYPD6B	4.47861e-10	1.21144e-12	MAP3K12	3.10333e-21	3.5679e-22
33	OSBPL5	2.38103e-08	8.05068e-11	NPM3	7.2999e-10	2.02942e-12	gga-mir-187	3.10333e-21	3.5679e-22
34	MAD1L1	4.60175e-08	1.59051e-10	COMTD1	9.22209e-10	2.6331e-12	TGM3	3.10333e-21	3.5679e-22
35	SLC18B1	5.80274e-08	2.0492e-10	HOXD12	1.17596e-09	3.44596e-12	GSX2	3.10333e-21	3.5679e-22
36	MKP3	8.26442e-08	3.04273e-10	BAG3	1.86697e-09	5.61116e-12	GRIP2	3.10333e-21	3.5679e-22
37	LPAR1	1.44919e-07	5.66219e-10	SNX10	2.98806e-09	9.20508e-12	CCDC85C	3.10333e-21	3.5679e-22
38	CDH2	2.44284e-07	9.91158e-10	ARID1B	3.10236e-09	9.79031e-12	NXPH3	3.10333e-21	3.5679e-22
39	SHISA2	4.15494e-07	1.74827e-09	HOXA9	3.37127e-09	1.08922e-11	NPY4R	3.10333e-21	3.5679e-22
40	GAS6	1.05982e-06	4.77789e-09	NUP205	4.28784e-09	1.41757e-11	NPY7R	3.10333e-21	3.5679e-22
41	2021-09-09	1.08058e-06	4.9527e-09	SPRY2	4.39599e-09	1.48636e-11	PDE6H	3.10333e-21	3.5679e-22
42	WDR36	1.89625e-06	8.8337e-09	MPZL2	9.64267e-09	3.3328e-11	gga-mir-6672	3.10333e-21	3.5679e-22
43	SLC25A4	1.92903e-06	9.13133e-09	EWSR1	1.86743e-08	6.59472e-11	RF00138	3.10333e-21	3.5679e-22
44	DKK3	1.95636e-06	9.4077e-09	CTNNBIP1	2.46273e-08	8.88205e-11	TPPP3	3.10333e-21	3.60671e-22
45	RAP1GDS1	2.16144e-06	1.05563e-08	ESRP2	3.05379e-08	1.12432e-10	ANKRD66	3.10333e-21	3.61931e-22
46	MANF	3.37199e-06	1.69752e-08	CD3E	3.29869e-08	1.23927e-10	GCNT3	3.10333e-21	3.66378e-22
47	MVK	4.03616e-06	2.09253e-08	GAD1	4.30682e-08	1.65037e-10	gga-mir-1746	3.10333e-21	3.66378e-22
48	NTM	4.08655e-06	2.14936e-08	DIXDC1	4.80635e-08	1.8779e-10	SLCO2A1	3.10333e-21	3.66378e-22
49	SYNPR	1.03193e-05	5.5512e-08	AP5M1	5.35154e-08	2.14725e-10	PRKCE	3.10333e-21	3.66378e-22
50	CD24	1.03193e-05	5.66013e-08	BNAS2	5.35154e-08	2.20174e-10	CACNB3	3.10333e-21	3.66378e-22
51	SIK1	1.18297e-05	6.57751e-08	SAT1	5.35154e-08	2.21155e-10	P2RX1	3.10333e-21	3.66378e-22
52	RSPO3	1.40854e-05	8.04334e-08	DLX5	6.12526e-08	2.57731e-10	UCN	3.10333e-21	3.66378e-22
53	QPCT	1.50477e-05	8.70594e-08	IGF1R	7.17885e-08	3.12726e-10	CXCR1	3.10333e-21	3.66378e-22
54	GRTP1	1.53271e-05	8.98276e-08	PTCHD1	7.17885e-08	3.12851e-10	CPA1	3.10333e-21	3.66378e-22
55	POSTN	1.60407e-05	9.52148e-08	FGF13	8.39319e-08	3.72078e-10	ADIRF	3.10333e-21	3.66378e-22
56	TWIST1	1.62784e-05	9.7849e-08	MSX2	1.10614e-07	5.06983e-10	CYTIP	3.10333e-21	3.66378e-22
57	C10H15ORF59	2.06639e-05	1.25763e-07	FER	1.32635e-07	6.1788e-10	INTS4	3.11174e-21	3.87541e-22
58	PPM1E	2.38388e-05	1.46877e-07	ID2	1.37878e-07	6.52665e-10	CDX1	3.17736e-21	4.12061e-22
59	BTG2	2.42225e-05	1.5106e-07	TPST1	1.62419e-07	7.81036e-10	UNC5D	3.24806e-21	4.24891e-22
60	APLP2	2.86696e-05	1.85103e-07	AHCYL2	1.67029e-07	8.15755e-10	CYBRD1	3.3409e-21	4.74305e-22
61	JCAD	2.86696e-05	1.85257e-07	AXIN2	1.81184e-07	8.98502e-10	TNNC2	3.3409e-21	4.77118e-22
62	PTTG1IP	3.18997e-05	2.08526e-07	REPS1	2.08201e-07	1.04812e-09	DOCK3	3.3409e-21	5.08829e-22
63	GADD45B	3.74496e-05	2.55048e-07	RAB3GAP1	2.10025e-07	1.07309e-09	ADRB2	3.3409e-21	5.08829e-22
64	GDF3	3.74496e-05	2.56061e-07	LRP11	2.21419e-07	1.14794e-09	KRT20	3.3409e-21	5.08829e-22
65	TUBAL3	4.63017e-05	3.20066e-07	RALY	2.23703e-07	1.17659e-09	CLIC5	3.3409e-21	5.08829e-22
66	ERO1A	4.73913e-05	3.31159e-07	GJA1	2.31598e-07	1.23551e-09	DUOX2	3.3409e-21	5.08829e-22
67	MID1	6.17272e-05	4.4061e-07	LHFPL6	2.47966e-07	1.34147e-09	WNT7A	3.34109e-21	5.09183e-22
68	CFD	6.65873e-05	4.80305e-07	METTL9	2.84329e-07	1.58091e-09	GBX2	3.34409e-21	5.10069e-22
69	FAM46A	7.34005e-05	5.4048e-07	ECH1	3.00429e-07	1.693e-09	GSAP	3.3471e-21	5.10779e-22
70	RAB30	7.63843e-05	5.6819e-07	HMOX1	3.11902e-07	1.78109e-09	ZNF513	3.35654e-21	5.13985e-22
71	WIF1	8.96673e-05	6.73735e-07	VSTM2L	3.29106e-07	1.90406e-09	PEBP4	3.35714e-21	5.16852e-22
72	DPYSL3	0.000106417	8.15575e-07	RIPK2	3.63379e-07	2.12965e-09	WFIKKN2	3.35714e-21	5.16852e-22
73	MYC	0.00010705	8.28472e-07	FGF1	3.83692e-07	2.28034e-09	NMU	3.35714e-21	5.16852e-22
74	CITED4	0.000110633	8.64514e-07	ZBED1	3.83692e-07	2.30835e-09	EDQM1	3.35714e-21	5.16852e-22
75	HMGN1	0.000115864	9.22806e-07	HOXC8	3.83692e-07	2.35189e-09	COQ10A	3.35714e-21	5.16852e-22
76	SUSD1	0.000118534	9.52977e-07	HOXC9	3.83692e-07	2.36402e-09	TOR1AIP2	3.35714e-21	5.16852e-22
77	PPP2R3C	0.000148394	1.21287e-06	EIF3H	4.09694e-07	2.55501e-09	HTR1A	3.35714e-21	5.16852e-22
78	MRPS30	0.000148394	1.21534e-06	MAF	5.12716e-07	3.23602e-09	KIAA2013	3.35714e-21	5.16852e-22
79	SDC4	0.000209702	1.74896e-06	UPP1	5.45621e-07	3.48469e-09	BRINP3	3.35714e-21	5.16852e-22
80	PTN	0.000221699	1.86568e-06	CHIC1	6.17769e-07	4.03225e-09	GATA6	3.44023e-21	5.34761e-22
81	TIMM50	0.000225618	1.9156e-06	EVX1	6.17769e-07	4.03831e-09	HSP90AA1	3.48082e-21	5.99287e-22
82	RPL22L1	0.000240598	2.06087e-06	BRSK2	6.40231e-07	4.23325e-09	MLC1	3.73462e-21	7.01241e-22
83	SMARCD2	0.000247458	2.13823e-06	REEP1	7.07852e-07	4.73355e-09	FBXO30	3.78071e-21	7.23704e-22
84	ZEB2	0.000316096	2.77881e-06	MEIG1	7.2871e-07	4.92779e-09	UBALD2	3.78071e-21	7.23704e-22
85	GMDS	0.000320846	2.84468e-06	HOXD11	7.32791e-07	5.01044e-09	DLGAP1	3.78071e-21	7.23704e-22
86	METTL6	0.000325437	2.90984e-06	POGLUT1	7.68877e-07	5.31495e-09	PMCH	3.78071e-21	7.24707e-22
87	KLHL9	0.000338474	3.05183e-06	SLC41A3	7.89804e-07	5.51896e-09	MYH1F	3.78071e-21	7.2823e-22
88	GADD45A	0.000356776	3.27047e-06	HOXA5	7.98289e-07	5.73805e-09	BEST3	3.78071e-21	7.2823e-22
89	PLCG1	0.000384125	3.55004e-06	DYNC1I1	7.98289e-07	5.93792e-09	TNFRSF6B	3.78071e-21	7.2823e-22
90	PARP16	0.000509523	4.74722e-06	MMP2	7.98289e-07	5.93903e-09	CA12	3.78071e-21	7.2823e-22
91	SMAP2	0.000521304	4.89616e-06	MFSD13A	7.98289e-07	6.15484e-09	TIFA	3.78071e-21	7.2823e-22
92	STMN1	0.000536288	5.07719e-06	KCNT1	7.98289e-07	6.53888e-09	AFG1L	3.78071e-21	7.41979e-22
93	CLMP	0.000584618	5.70375e-06	COL3A1	7.98289e-07	6.75454e-09	CCDC88C	3.78071e-21	7.45844e-22
94	DMRT1	0.000584618	5.71045e-06	MBP	7.98289e-07	6.87832e-09	TTR	3.78071e-21	7.53372e-22
95	C1D	0.000586402	5.77194e-06	EAF2	7.98289e-07	7.07468e-09	KCNC1	3.78071e-21	7.53372e-22
96	PXN	0.000622519	6.1742e-06	NAXE	7.98289e-07	7.21349e-09	NYAP2	3.96433e-21	8.47441e-22
97	ABHD4	0.000639612	6.3918e-06	MNX1	7.98289e-07	7.21616e-09	DRD5	3.97659e-21	8.51849e-22
98	P4HA2	0.000680664	6.85318e-06	MLF1	7.98289e-07	7.45626e-09	KLHL6	3.97659e-21	8.51849e-22
99	TMSB15B	0.000711625	7.21838e-06	TP63	7.98289e-07	7.6446e-09	KCTD8	4.12888e-21	8.98123e-22
100	DDX10	0.000723519	7.39338e-06	LPGAT1	7.98289e-07	7.6956e-09	DOCK9	4.4033e-21	9.96194e-22

## Sheet: ChickNMPearly&late (Figure 5A)
Rank	NMPearly	pvals	log2foldchanges	NMPlate	pvals	log2foldchanges
0	CLDN1	2.398e-35	2.73416	RASGRP3	2.16606e-34	2.65493
1	Wpkci-7	1.72759e-33	2.43287	HOXD12	2.63599e-20	2.3718
2	PLPP1	3.08296e-23	2.42771	CD99	5.75327e-16	2.24078
3	PRTG	6.14411e-18	1.42633	HOXA9	6.31888e-16	2.01751
4	DRAXIN	1.50336e-15	3.24385	HOXA11	7.25108e-11	1.75275
5	NKAIN4	1.22298e-15	2.02914	SCD	5.59348e-10	1.40693
6	SP5	4.09928e-13	1.34945	HOXC9	3.42132e-09	2.07697
7	WNT8A	1.96774e-10	1.60452	HOXC10	5.86226e-09	1.83977
8	VRTN	1.2269e-09	1.90814	GREB1	6.86678e-09	1.89025
9	NT5DC2	1.24814e-08	1.08256	WNT5A	2.25154e-08	1.04841
10	EPCAM	1.89487e-08	1.57587	ACTG1	2.31044e-08	0.605312
11	EPHA1	7.27162e-08	1.60522	S100A6	1.33572e-07	2.05501
12	TMSB15B	1.06397e-07	0.5401	HOXB5	2.3143e-07	1.48955
13	CDH2	2.77672e-07	0.609784	ARL1	3.18824e-07	1.29635
14	MT4L	1.19352e-06	1.81287	NREP	7.62367e-07	1.70076
15	FN1	1.73504e-06	0.969766	STMN1	1.66423e-06	0.600607
16	CACNG3	2.99765e-06	1.6729	CCNI	1.8317e-06	1.2905
17	CTSZ	3.51852e-06	1.85756	SNX10	2.4229e-06	3.01693
18	CXCL14	4.7091e-06	2.20044	ENHO	2.32344e-06	1.42039
19	MPZL3	5.01058e-06	1.51831	HOXA4	2.50079e-06	1.3654
20	MESP1	5.86866e-06	1.50277	PSMD1	4.84635e-06	0.795833
21	HSP90AA1	9.10298e-06	0.523319	PDE6D	5.26233e-06	1.42162
22	AMY1A	1.07949e-05	3.09582	FSTL1	5.61577e-06	1.20343
23	CFC1	1.22795e-05	2.01391	METTL6	9.40568e-06	1.16872
24	CNTN2	1.78685e-05	2.93536	ATF4	1.60521e-05	0.710655
25	MCAT	1.92291e-05	2.21048	FGF18	1.68522e-05	0.963156
26	DLL1	2.73581e-05	0.711973	HOXD4	1.82104e-05	1.47881
27	PMVK	3.13461e-05	1.27274	HOXD11	1.87924e-05	1.50073
28	PLAC8L1	3.66329e-05	3.32721	EEF1A1	1.96456e-05	0.346688
29	BMP2	4.72768e-05	2.14475	TUBAL3	2.06772e-05	1.70798
30	LIN28A	4.892e-05	2.1004	ASB13	2.45902e-05	1.73319
31	KRAS	4.78701e-05	0.906056	DIXDC1	3.24818e-05	3.18484
32	MDK	5.06014e-05	0.536203	BRI3	3.50205e-05	1.12812
33	PPAT	6.5015e-05	1.15454	chPKCI	4.0749e-05	0.850861
34	GJA1	7.32485e-05	0.48841	ARHGEF9	5.3669e-05	1.45415
35	UCH-L1	0.000100844	0.780333	HDGF	5.34188e-05	0.520846
36	NUCB2	0.000108871	0.926306	HAPLN1	5.59644e-05	1.68225
37	CD24	0.000115887	0.69183	JARID2	5.82757e-05	0.979931
38	CACUL1	0.000121433	2.81039	OAF	5.94472e-05	1.48934
39	MYLK	0.000123244	2.50485	MID1IP1	6.01213e-05	1.28875
40	AKR1D1	0.00015702	2.28662	H3F3C	6.90167e-05	0.482513
41	LZTS1	0.000212275	1.9708	RPS15A	0.000129223	0.499759
42	HTRA1	0.000244018	2.29894	NUP205	0.000155294	0.897387
43	DHODH	0.000298572	1.01102	HOXD8	0.000161249	1.44885
44	ACOT7	0.000300575	0.974598	TXN	0.000160581	0.545439
45	RAB3A	0.000323761	2.01366	HMGN4	0.000188821	0.455086
46	TOMM20	0.000322777	0.571247	SOD1	0.000192389	0.714209
47	NFASC	0.000384121	1.92318	CKAP2	0.000194114	0.784517
48	MCRIP2	0.000476349	1.68358	FANCC	0.000215574	2.0382
49	AP1S3	0.000559258	1.26239	FAU	0.000209079	0.436609
50	SP4	0.000640146	24.279	TPST1	0.000288976	0.863112
51	GXYLT2	0.000619342	1.43079	TMEM123	0.000290019	1.07663
52	MT3	0.000731311	2.48329	TESC	0.000315614	1.34278
53	LSS	0.000897754	1.00724	C9orf3	0.000336437	1.68641
54	GCHFR	0.00098533	2.47545	HDGFL3	0.000339448	1.25084
55	AIG1	0.000991105	1.35661	LGALS8	0.000339153	1.29353
56	2021-09-09	0.000990345	0.668851	GULP1	0.000358702	1.39269
57	ITPK1	0.00103409	1.59917	HOXA5	0.0003671	1.25887
58	AGRP	0.00105166	1.51182	RPL27	0.000363896	0.462248
59	GJB1	0.00111315	2.38795	CD3E	0.000386427	1.88733
60	MFGE8	0.00127781	0.798707	ATP5ME	0.000409191	0.628157
61	ARL8BL	0.00135145	0.913864	ARID1B	0.000428533	1.30036
62	DHDDS	0.00143803	2.72301	HOXC8	0.000443363	2.29003
63	CKS1B	0.00146595	0.480972	HNRNPH2	0.000469035	0.470171
64	SELENOS	0.00148663	1.10307	FAM168B	0.000476501	1.33248
65	TSPAN13	0.00150796	1.19589	IGF1R	0.00049297	0.89101
66	B2M	0.00153096	1.01477	RPL26L1	0.000492395	0.347589
67	NOL11	0.00157088	0.979283	ANXA2	0.000501199	1.50528
68	EIF2AK3	0.00173943	23.9609	PMP22	0.000550991	1.69601
69	TSPAN16	0.00173943	23.9609	RPL37A	0.000557252	0.45179
70	CTSA	0.00173379	1.0519	VIM	0.0005943	0.834259
71	LARP7	0.00184688	0.794427	RPL29	0.00061095	0.430468
72	SPIN1W	0.00199466	2.26272	AP5M1	0.000660945	1.06254
73	DPYSL3	0.00201864	0.668786	SRGAP1	0.000724562	1.46495
74	GNA11	0.00208351	1.57141	SEM1	0.000715501	0.581928
75	XPR1	0.00214533	1.38464	GARS	0.000720662	0.808045
76	SENP5	0.00216611	1.08558	GLO1	0.000722664	0.932717
77	SGK3	0.00232976	2.68463	ABHD18	0.000742465	1.53998
78	Meis2a.2	0.00236311	1.14635	SALL1	0.000745178	0.757784
79	IL6R	0.00241955	2.62879	SARNP	0.000851363	0.873501
80	RGN	0.00241468	1.25536	KLHL24	0.000944209	1.06959
81	HOXB8	0.00250816	1.04373	HNRNPUL1	0.000968105	1.1082
82	LACTB	0.0028174	2.27472	RPL35	0.0009734	0.450896
83	DUSP14	0.00288206	1.63076	DTNBP1	0.00105916	1.68575
84	SMARCA4	0.00292737	1.45837	H2AFZ	0.00111214	0.542505
85	RMDN3	0.00301926	23.8166	ABRAXAS2	0.00116675	0.698125
86	CHRD	0.0032905	2.11291	ENO1	0.0011736	0.353925
87	EXOSC7	0.00335742	0.945381	HOXC12	0.00135103	1.88223
88	CCDC88C	0.00345266	1.3611	C12orf66	0.00142066	0.42318
89	TRARG1	0.00367143	1.54871	LIFR	0.00143589	1.37894
90	CYP1B1	0.00409628	1.45388	GPX8	0.00148966	2.52949
91	DACT1	0.00412484	1.82584	LYPD6B	0.0014694	1.64534
92	PDZRN3	0.00418884	1.36795	RPL11	0.0015103	0.380518
93	IRF6	0.00421734	1.42464	MRPS17	0.00151624	0.834121
94	PGM2	0.00456351	23.5541	CRTAC1	0.00156263	2.96388
95	MYCL	0.00448895	0.751705	ILKAP	0.00155107	1.06523
96	URB1	0.00491013	3.17825	REEP5	0.00157311	1.69208
97	MRPS35	0.00491019	1.5226	POU2F1	0.00156381	1.03718
98	ST14	0.00495493	0.941861	PGAM1	0.00164216	0.441628
99	EIF2S2	0.00495425	0.400267	COTL1	0.00165524	0.784975

## Sheet: ChickNMPearlylatenoHOX(Supfig9)
Rank	NMPearly	pvals	log2foldchanges	NMPlate	pvals	log2foldchanges
0	PLPP1	2.12915e-10	1.61176	FGF19	7.95442e-22	2.74321
1	Wpkci-7	3.74435e-10	1.20625	RASGRP3	2.05257e-21	1.91262
2	CLDN1	3.30482e-09	1.35703	ANP32B	1.59703e-05	0.409983
3	PRTG	1.21241e-08	0.92287	EEF1B2	2.2771e-05	0.327846
4	SP5	4.59047e-07	1.22467	STMN1	2.81511e-05	0.400683
5	NKAIN4	4.87656e-05	1.39225	WNT5A	3.67752e-05	0.686321
6	CDH2	6.17863e-05	0.462504	HDGF	5.08562e-05	0.435679
7	VRTN	0.000102123	1.73804	CD99	6.16219e-05	1.14041
8	KRAS	0.000161127	1.05068	HOXD12	8.02124e-05	1.0267
9	FN1	0.000335416	0.840003	H3F3C	0.000112418	0.346403
10	GJA1	0.00040257	0.459267	HMGN4	0.000199919	0.335814
11	NT5DC2	0.00140654	0.695305	SKP1	0.000267896	0.619355
12	PDZRN3	0.00222809	3.681	RPL11	0.00043471	0.355314
13	TMSB15B	0.00227783	0.352003	PSMD1	0.000561985	0.525493
14	CD24	0.0026898	0.641214	SRSF1	0.00085199	0.333291
15	MSGN1	0.0055683	0.529496	EEF1A1	0.00105761	0.221568
16	MDK	0.00942607	0.323569	SEM1	0.00114555	0.464482
17	EIF2S2	0.00960274	0.389874	PRPF8	0.00122985	0.62871
18	DLL1	0.0121302	0.45958	ACTG1	0.00131326	0.253828
19	WNT8A	0.0147122	0.819168	HOXD4	0.00152588	1.36176
20	MESP1	0.0183317	1.26966	RPL27	0.00154612	0.319891
21	CACNG3	0.0233926	1.30177	ATP5MC3	0.00192724	0.403114
22	HSP90AA1	0.0241397	0.264499	RPS15A	0.00202942	0.318701
23	DRAXIN	0.0258534	1.18257	GREB1	0.00209577	1.06626
24	AGRP	0.0348866	1.97765	H3F3B	0.00237591	0.330517
25	NUCB2	0.0351833	0.807529	HOXA7	0.00249371	0.583844
26	MPZL3	0.038736	1.13423	RPL35	0.00262406	0.315504
27	NDUFAB1	0.0392178	0.346674	RPL4	0.00281636	0.258384
28	LARP7	0.0409148	0.809902	CKAP2	0.0029093	0.549658
29	SLC9A3R1	0.0421682	0.534316	PPIA	0.00324133	0.242755
30	DNMT3A	0.04579	0.369419	BTF3	0.00331226	0.428268
31	B2M	0.0494509	1.16255	PARK7	0.0035106	0.796629
32	IMMT	0.0502784	0.42995	ACTB	0.00352818	0.172429
33	CENPF	0.0536907	0.443943	ATP5ME	0.00381024	0.428613
34	ABCE1	0.0548454	0.412715	DDX5	0.00398674	0.336153
35	KPNA2	0.063386	0.355156	HMGB1	0.00461153	0.302328
36	PPP4R2	0.0655376	0.408912	RPL29	0.0047463	0.25234
37	NFASC	0.0735282	1.93731	HOXA9	0.00477653	0.727409
38	GBX2	0.0736044	1.1374	DDX19B	0.00478367	0.300831
39	FBXO5	0.0810342	0.67349	TUBA1B	0.00511316	0.182888
40	CWC15	0.0872318	0.457032	LDHB	0.00564285	0.277856
41	COPE	0.0913753	0.377965	chPKCI	0.00569907	0.521177
42	CISD2	0.10786	0.605121	SNW1	0.00570326	0.811023
43	ALDH1A2	0.108613	0.973032	RHOA	0.00573684	0.325044
44	CADM1	0.119238	0.619637	METTL6	0.00580879	0.656325
45	DCAF13	0.119997	0.593287	COX7A2	0.00611372	0.595886
46	IPO5	0.120986	0.271383	RPL37A	0.00631269	0.284826
47	ST14	0.125941	1.08017	MSX1	0.00676473	0.424662
48	TRABD	0.126762	0.638169	ABRAXAS2	0.00718616	0.549838
49	PDPK1	0.12949	0.453107	TUBAL3	0.0074854	1.46747
50	SUCLG2	0.137697	0.541765	CHST15	0.007992	0.515304
51	XPA	0.141627	0.298604	ATP5MF	0.0086958	0.405873
52	ADSS	0.144404	0.432821	ATF4	0.00892467	0.355788
53	DDX46	0.145055	0.333323	COX7C	0.00919098	0.299443
54	GDF3	0.145316	1.69002	BID	0.00919098	0.507231
55	CD2AP	0.147518	0.49388	TBCA	0.0103285	0.542614
56	TARS	0.148314	0.406034	FTH1	0.0104395	0.304426
57	VTN	0.154586	0.852414	TXN	0.0104611	0.301912
58	ACOT7	0.155032	0.557809	AZIN1	0.0107901	0.646041
59	YRDC	0.155961	0.50434	NREP	0.0109956	1.01267
60	RDH10	0.173976	1.41067	CCT6A	0.0112046	0.337284
61	TMEM189	0.178704	0.625118	ARL1	0.0116015	0.630114
62	CHCHD4	0.179661	0.465773	HNRNPH2	0.0117646	0.277779
63	CTSZ	0.179776	0.967609	PFN2	0.0118932	0.557756
64	PFKL	0.184191	0.637728	EWSR1	0.012412	0.942434
65	TUBA1C	0.190721	0.17783	HOXC10	0.0130031	0.864318
66	PDHB	0.190882	0.593841	FAU	0.0138438	0.211201
67	RAD21	0.193178	0.286415	FGF18	0.0138901	0.523804
68	EXOSC7	0.199526	0.670715	ARHGDIA	0.0141001	0.566735
69	TSPAN13	0.203575	0.816219	TRA2A	0.0143557	0.58626
70	USP47	0.209138	0.615914	DYL1	0.014413	0.3482
71	TNFAIP8L1	0.209567	0.59301	ATP5C1	0.0144178	0.329958
72	BMS1	0.213762	0.288614	GNG5	0.0152476	0.662593
73	AKIRIN2	0.215641	0.220553	G3BP1	0.0165684	0.607736
74	MRPS18A	0.218815	0.931393	BRD2	0.0166933	0.523661
75	SENP5	0.219435	0.911689	VIM	0.0167807	0.59594
76	PAIP2B	0.221038	0.196194	H2AFZ	0.017073	0.353909
77	PLAC8L1	0.221618	2.72596	GPC1	0.0173135	0.737882
78	GXYLT2	0.221618	1.04719	HOXA11	0.0174603	0.577883
79	PALD1	0.223322	0.161955	MIF	0.0174944	0.205367
80	ATP5MC1	0.224583	0.192007	SOD1	0.0178553	0.400839
81	NCOR2	0.226803	0.36449	PPM1G	0.0178842	0.659031
82	DNAJC11	0.230184	0.99678	ALDH7A1	0.0180178	0.492944
83	NARS	0.230276	0.221414	ENHO	0.0187289	0.858243
84	HSPD1	0.233323	0.124399	SMARCE1	0.0193712	0.305423
85	CTSD	0.233741	0.333267	HNRNPA3	0.0195332	0.260325
86	CACUL1	0.236258	1.85102	EIF5A2	0.0200582	0.229305
87	DUS1L	0.238229	0.386625	SERBP1	0.0218937	0.174445
88	USO1	0.240164	0.593773	HNRNPA2B1	0.0219283	0.274129
89	TCOF1	0.240875	0.263838	TPST1	0.022067	0.493367
90	LYAR	0.242301	0.356776	NUP205	0.0221506	0.580706
91	MEX3A	0.243112	0.236849	IGF1R	0.0224523	0.638343
92	SGPL1	0.245459	0.437319	WLS	0.0227149	0.355539
93	PDZD11	0.246663	0.47907	PRDX3	0.0233281	0.382851
94	DPYSL3	0.248016	0.356059	SCD	0.0233866	0.50724
95	EPCAM	0.25025	0.594131	GLO1	0.0238588	0.675432
96	AIG1	0.250543	1.44016	COX7B	0.0250756	0.303032
97	SELENOT	0.254169	0.499392	RPL23A	0.0255298	0.232672
98	SEPT9	0.254416	0.371459	CALM2	0.0257277	0.321681
99	DUSP14	0.260128	1.43425	STMP1	0.0257356	0.722322
998	UBE2A	0.787622	SP8	0.415414	NDUFAF1	0.553314
999	ROCK1	0.787895	HP1BP3	0.415414	CSNK1D	0.553314

## Sheet: Mouse_Subset (Figure 3K)
Rank	Neural_Tube	pvals_a	pvals	PSM	pvals_a	pvals	Somite	pvals_a	pvals	NMP	pvals_a	pvals			Neural_Tube								PSM
0	Ptn	0	0	Ifitm1	0	0	Foxc2	0	0	Cdx1	0	0
1	Crabp2	0	0	Rspo3	0	0	Tcf15	0	0	Cdx2	0	0
2	Map1b	0	0	Hoxb1	0	0	Prrx2	0	0	Nkx1-2	0	0		Neural_Tube								Neural_Tube
3	Mif	0	0	Lef1	0	0	H2afy2	0	0	Hoxaas3	0	0
4	Sox2	0	0	Dll3	0	0	Nnat	0	0	Grsf1	0	0		PSM								PSM
5	Sfrp1	0	0	Tbx6	0	0	Arg1	0	0	Rbp1	0	0
6	Sfrp2	0	0	Cited1	0	0	Meox1	0	0	Hoxb8	0	0		Somite								Somite
7	Cntfr	0	0	Rbp1	0	0	Ppp1r1a	0	0	Crabp2	0	0
8	Gapdh	0	0	Laptm4b	0	0	Hmga2	0	0	Etv4	0	0		NMP								NMP
9	Pax6	0	0	Pdlim4	0	0	Marcks	0	0	Cdx4	0	0
10	Pgam1	0	0	Dll1	0	0	Fst	0	0	Hes3	0	0
11	Fam181b	0	0	Smc6	0	0	Twist1	0	0	Lhpp	0	0
12	Fabp5	0	0	Hes7	0	0	Fbn2	0	0	Hoxa1	0	0
13	Pls3	0	0	Cdx1	0	0	Six1	0	0	Hoxb9	0	0
14	Hes3	0	0	T	0	0	Tmsb10	0	0	Sp5	0	0
15	Stmn2	0	0	Pcdh19	0	0	Ifitm1	0	0	Hoxb1	0	0
16	Slc2a1	0	0	Crabp1	0	0	Col26a1	0	0	Epha5	0	0
17	Pdzph1	0	0	Hoxb2	0	0	Mfap2	0	0	Tspan13	0	0
18	Fgf15	0	0	Gpc3	0	0	H3f3a	0	0	Fgf17	0	0
19	Pkm	0	0	Car3	0	0	H2afv	0	0	Fgf8	0	0		Somite									NMP
20	Mir124-2hg	0	0	Frzb	0	0	Hmgn1	0	0	Slc2a3	0	0
21	Gm2694	3.4692e-300	8.84728e-298	Hoxaas3	0	0	Mfap4	0	0	Pou5f1	0	0
22	Gja1	2.22843e-298	5.48929e-296	Ypel3	0	0	Serpinh1	0	0	Hes7	0	0		Neural_Tube								Neural_Tube
23	Tspan13	3.43385e-298	8.36354e-296	Fabp7	0	0	Tbx1	0	0	Stmn2	0	0
24	Bex4	4.81076e-288	1.13351e-285	Sp5	0	0	Ebf1	0	0	Mgst1	0	0		PSM								PSM
25	Foxb1	4.68299e-279	1.03585e-276	Fn1	0	0	Ptma	0	0	Slc2a1	0	0
26	Fez1	2.59787e-271	5.11946e-269	Phlda2	0	0	Foxc1	0	0	Hotairm1	0	0		Somite								Somite
27	Bex1	3.32202e-276	7.12984e-274	Aldh1a2	0	0	Aldh1a2	0	0	Nr6a1	0	0
28	Ldha	1.62639e-275	3.42284e-273	Nkd1	0	0	Fzd2	0	0	Cxx1a	0	0		NMP								NMP
29	Tmem47	4.93326e-271	9.63408e-269	Hoxb3os	0	0	Crabp1	0	0	Fgfbp3	0	0
30	Pgk1	1.26899e-270	2.45606e-268	Chst7	0	0	Fstl1	0	0	T	0	0
31	Rprm	3.92351e-262	7.14705e-260	H3f3a	0	0	Pdlim4	0	0	Bex4	0	0
32	Sox21	8.92908e-258	1.58652e-255	Ptk7	0	0	Prtg	0	0	Cxx1b	0	0
33	Sap30	5.8598e-259	1.04978e-256	Hoxa1	0	0	Cd24a	5.82371e-303	2.57634e-300	Pabpc1	0	0
34	Id3	3.79631e-257	6.69046e-255	Ifitm2	0	0	Cald1	6.58287e-306	3.10211e-303	Gbx2	0	0
35	H2afv	3.31514e-248	5.57071e-246	Snai1	0	0	Sms	1.58468e-284	6.73551e-282	Hoxb5os	0	0
36	Calm2	1.82404e-247	3.0183e-245	Mesp1	0	0	Foxd1	5.76545e-269	2.15479e-266	Oat	0	0
37	Slc2a3	1.01673e-245	1.65711e-243	H2afv	0	0	Foxp1	2.98136e-277	1.21937e-274	Hoxb2	0	0
38	Sox1	4.6766e-239	7.29315e-237	Gnas	0	0	Cdh11	6.285e-273	2.52296e-270	Ldhb	0	0
39	Rfx4	6.29199e-237	9.53786e-235	Fgf8	0	0	Fscn1	6.08785e-270	2.3152e-267	Wnt5b	0	0
40	Tubb3	9.11351e-241	1.43155e-238	Cdx2	0	0	Ptn	1.75523e-270	6.91785e-268	Greb1	0	0
41	Tpi1	4.7784e-237	7.29447e-235	Rftn1	0	0	Mdk	2.78109e-264	1.02179e-261	Psip1	0	0
42	Id2	2.48705e-236	3.74388e-234	Grsf1	0	0	Alx1	7.14882e-255	2.38408e-252	Hoxc8	0	0
43	Emb	7.34636e-232	1.04768e-229	Ptma	0	0	Hmgb1	2.32492e-261	8.39953e-259	Sema6a	0	0
44	Tmsb4x	2.77405e-226	3.87956e-224	Hmgn1	0	0	Rbms1	6.07466e-261	2.1587e-258	Phlda3	0	0
45	1700011H14Rik	1.73799e-219	2.35466e-217	Marcksl1	0	0	Tead2	4.94002e-256	1.6732e-253	Skap2	0	0
46	Set	1.69066e-221	2.31952e-219	Gfra3	0	0	Irx5	1.59171e-252	5.14977e-250	Igfbp2	0	0
47	Psip1	2.84119e-219	3.82536e-217	Gal	0	0	Plat	6.91914e-244	2.08314e-241	Set	0	0
48	Vstm2b	1.45742e-212	1.88051e-210	Arg1	0	0	Marcksl1	3.30814e-244	1.01001e-241	Mkrn1	0	0
49	Akr1b3	1.41963e-212	1.84271e-210	Pou5f1	0	0	H2afy	6.47564e-247	2.03438e-244	Ptk7	0	0
50	Selenoh	9.25434e-212	1.16632e-209	Fst	0	0	Lmo4	1.72147e-240	5.11182e-238	Ccnd1	0	0
51	H2-Ke6	2.75562e-207	3.33707e-205	H2afy	0	0	Tspan6	6.5605e-236	1.92178e-233	Eno1	4.45346e-307	1.72389e-304
52	Lpar4	5.94765e-205	7.12305e-203	Mogat2	0	0	Col23a1	8.03617e-228	2.29211e-225	Epha1	8.92724e-303	3.39501e-300
53	Hes5	2.29679e-201	2.67675e-199	Rnf213	0	0	Fbln1	3.89804e-226	1.09737e-223	Foxb1	1.16952e-300	4.2969e-298
54	Fam181a	2.53844e-198	2.9269e-196	Meis2	0	0	Lrig3	1.43313e-218	3.83529e-216	Evx1os	6.89599e-297	2.37277e-294
55	Rtn3	1.15764e-197	1.31382e-195	Cdx4	0	0	Clmp	1.32931e-215	3.35063e-213	Hoxb4	3.19717e-297	1.11782e-294
56	Rgma	1.62026e-191	1.76495e-189	Tmsb10	0	0	Sox4	1.70958e-218	4.51934e-216	Acot7	2.61227e-301	9.76312e-299
57	Hnrnph3	3.14215e-192	3.45748e-190	Hoxa2	0	0	Hmgn3	4.95068e-216	1.26254e-213	Ccnd2	2.77656e-300	1.00313e-297
58	Tubb2b	2.04869e-189	2.20942e-187	Prtg	0	0	Pdgfra	3.29271e-213	8.01979e-211	Tgif1	3.41826e-300	1.21471e-297
59	Pfn2	1.44237e-189	1.56331e-187	Sh3gl3	0	0	Gpc3	2.15228e-215	5.36265e-213	Nefm	4.30721e-294	1.45887e-291
60	Ezr	1.62283e-187	1.74148e-185	Hoxb5os	0	0	Limd2	1.72505e-214	4.24932e-212	Wnt3a	1.22927e-278	3.86186e-276
61	Lhx5	1.30564e-183	1.38737e-181	Tcea3	0	0	Ebf2	5.01021e-207	1.1805e-204	Notum	4.38563e-275	1.33898e-272
62	Pcsk1n	4.03657e-183	4.26833e-181	Pclaf	1.99767e-304	4.75863e-302	Epb41l3	2.00691e-208	4.83376e-206	Pak1	6.68985e-281	2.16442e-278
63	Btbd17	1.07923e-178	1.09833e-176	Hmgb3	1.96171e-296	4.42959e-294	Gas1	2.93945e-206	6.85144e-204	Car14	2.76812e-282	9.0916e-280
64	Cdca7	4.73014e-181	4.92958e-179	Rasgrp3	1.24146e-291	2.77434e-289	Pclaf	1.84338e-204	4.16239e-202	Ccnjl	9.12156e-280	2.90777e-277
65	Cpe	2.5412e-180	2.63567e-178	Hmgb1	1.26752e-289	2.80367e-287	Car14	4.00383e-203	8.85623e-201	Cystm1	3.30032e-277	1.02201e-274
66	Sox11	8.41196e-178	8.44195e-176	Cdh2	5.87927e-282	1.28732e-279	Plpp3	8.63028e-197	1.85226e-194	Hoxc4	1.36406e-268	3.99577e-266
67	En1	5.08239e-174	4.87482e-172	Hoxb4	1.67053e-277	3.58534e-275	Smoc1	9.28532e-195	1.95416e-192	Evx1	1.22736e-271	3.64459e-269
68	Dek	1.09532e-176	1.07924e-174	Tceal8	1.16123e-279	2.5172e-277	Zcchc3	8.35258e-194	1.74095e-191	Hoxa7	7.1286e-261	2.00684e-258
69	Apba2	1.14435e-174	1.10742e-172	Gbx2	4.00555e-274	8.26937e-272	Cadm1	2.52062e-191	4.96722e-189	Fst	2.23448e-265	6.45824e-263
70	Hnrnpa1	4.17311e-175	4.0748e-173	Rcn2	2.12562e-275	4.43049e-273	Laptm4a	8.46259e-191	1.65264e-188	Ncam1	2.14117e-253	5.73014e-251
71	Stmn3	3.10964e-173	2.91808e-171	Evx1	1.75633e-269	3.52519e-267	Npm1	1.94076e-189	3.75624e-187	Rxrg	6.53306e-249	1.70623e-246
72	Tuba1a	1.48093e-172	1.36605e-170	Mdk	7.59173e-268	1.50978e-265	Irx1	7.95643e-184	1.46162e-181	Hoxa3	1.83215e-241	4.51312e-239
73	Frat2	5.8069e-173	5.40242e-171	Arl4d	3.64493e-267	7.18284e-265	Basp1	3.00604e-184	5.5694e-182	Cdkn1a	3.68358e-245	9.28477e-243
74	Bnip3l	1.57934e-172	1.45065e-170	Wnt5a	4.09176e-266	7.91939e-264	Cer1	4.93854e-182	8.92105e-180	Wnt8a	2.46314e-240	5.99927e-238
75	Msi1	5.09102e-172	4.63689e-170	Tead2	7.69992e-267	1.5037e-264	Gnas	2.25837e-181	4.04584e-179	Gap43	6.27766e-245	1.56415e-242
76	Pou3f1	3.72818e-172	3.40995e-170	Epha4	1.53735e-259	2.89785e-257	Stra6	1.01754e-175	1.73678e-173	Fzd10	2.75094e-235	6.48176e-233
77	Spsb4	7.99551e-170	7.16193e-168	Evx1os	3.07495e-258	5.74618e-256	Tfpi	1.98589e-174	3.36313e-172	H2afv	3.33253e-238	8.0266e-236
78	Sall2	7.54463e-169	6.59456e-167	Hoxd4	2.01726e-256	3.73746e-254	Nfil3	1.26845e-167	2.06738e-165	Bcat1	2.01478e-237	4.79939e-235
79	Gnai2	1.34577e-169	1.2005e-167	Fscn1	1.52052e-255	2.79325e-253	Nr2f2	2.40966e-166	3.8692e-164	Pdgfa	2.48929e-228	5.68004e-226
80	Ranbp1	2.93447e-168	2.54294e-166	Fgf3	1.85553e-255	3.38003e-253	Laptm4b	6.37433e-168	1.05478e-165	Spint2	4.41489e-228	9.96891e-226
81	Marcksl1	3.59435e-165	3.01995e-163	2610528A11Rik	9.3525e-250	1.64825e-247	Vcan	2.95944e-166	4.71704e-164	Hoxc6	1.31841e-220	2.85791e-218
82	C130026L21Rik	1.84509e-162	1.515e-160	Fgf15	2.31234e-250	4.10857e-248	Pcbp4	3.2254e-166	5.10344e-164	Hoxb7	1.29774e-221	2.84153e-219
83	Kif21a	2.94659e-164	2.45666e-162	Fam212a	1.49753e-244	2.57634e-242	Pcolce	5.06167e-163	7.83727e-161	Akr1b3	1.43638e-222	3.20993e-220
84	Igfbp2	4.8899e-163	4.03035e-161	Nrarp	3.72542e-240	6.35874e-238	Pard6g	1.70431e-162	2.62016e-160	Gja1	7.02441e-222	1.55376e-219
85	RMST_1	2.19111e-159	1.75913e-157	Notch1	2.29168e-236	3.85091e-234	Lpar1	8.23629e-162	1.25731e-159	Smim3	1.58055e-219	3.39223e-217
86	Nrcam	1.40356e-159	1.13104e-157	Hoxa5	8.11124e-233	1.33203e-230	Pdgfrb	1.42605e-156	2.03371e-154	Bex1	1.49226e-202	3.02314e-200
87	Mycl	6.37529e-160	5.15661e-158	Maged2	5.78819e-235	9.65159e-233	Mycn	1.09265e-158	1.61125e-156	Pmaip1	3.58065e-205	7.32242e-203
88	Pcbd1	4.73593e-160	3.84497e-158	Tspan6	1.51996e-234	2.51513e-232	Wls	4.31702e-158	6.32297e-156	Pim1	2.47898e-197	4.92998e-195
89	Lmo1	6.73365e-158	5.3272e-156	Tpm4	6.88447e-229	1.11369e-226	Colec12	2.24293e-157	3.24134e-155	Pycr1	1.76122e-195	3.37857e-193
90	Hn1l	2.64698e-157	2.07893e-155	Vim	2.0793e-228	3.33875e-226	Ttc3	1.19002e-155	1.67506e-153	Fabp5	9.46605e-197	1.84861e-194
91	Nkx6-1	6.58611e-154	5.06267e-152	Pcolce2	2.66182e-225	4.2117e-223	Jam3	1.25212e-155	1.75111e-153	Arid3b	2.32377e-196	4.49754e-194
92	Irx5	1.93916e-154	1.50126e-152	Hotairm1	1.28297e-220	2.00078e-218	Rab34	5.42297e-155	7.53549e-153	Ifngr2	2.96028e-189	5.43814e-187
93	Cdk4	2.21346e-154	1.70752e-152	Sms	3.51365e-219	5.44038e-217	Tmem119	3.1842e-152	4.26073e-150	Cenpx	2.79218e-191	5.21777e-189
94	Cotl1	9.15656e-154	7.01367e-152	Hmgb2	3.24199e-214	4.94906e-212	Gstm5	7.57702e-152	1.00765e-149	Igdcc3	1.12852e-189	2.09084e-187
95	Ctsl	6.94235e-153	5.29892e-151	Sct	4.74761e-208	7.0489e-206	Meis2	1.32061e-151	1.73496e-149	Chd3	5.02575e-189	9.15489e-187
96	Prr7	4.98635e-152	3.7926e-150	Wnt3a	1.30237e-205	1.8821e-203	Nedd4	1.03915e-148	1.32504e-146	Tcea3	3.37847e-188	6.05249e-186
97	Nr2f1	2.77231e-150	2.08665e-148	Adamtsl2	1.47335e-203	2.08743e-201	Traf3ip2	5.66393e-146	7.01583e-144	Tmem59l	1.13983e-187	2.02525e-185
98	Nipsnap1	4.06412e-149	3.04837e-147	Mrfap1	3.89149e-207	5.73849e-205	Dcakd	4.00205e-148	5.07324e-146	Map1b	1.89723e-187	3.34359e-185
99	Ehbp1	2.29505e-143	1.65833e-141	Smoc1	2.82381e-205	4.05376e-203	Dbn1	1.58067e-147	1.9921e-145	Mycl	1.21095e-186	2.11692e-184
100	Sox3	2.01451e-143	1.46048e-141	Rhbg	3.60076e-202	5.03572e-200	Mrfap1	3.31771e-146	4.15711e-144	Apela	2.84765e-182	4.78516e-180

## Sheet: Mouse_Subset (Figure 4A)
Rank	PSM	log2foldchanges	pvals	pvals_adj	NMP	log2foldchanges	pvals	pvals_adj	Neural_Tube	log2foldchanges	pvals	pvals_adj	Somite	log2foldchanges	pvals	pvals_adj
0	Cited1	20.4015	0	0	Cdx2	7.38948	0	0	Ptn	9.75566	0	0	Meox1	11.171	0	0
1	Smc6	9.18404	0	0	Nkx1-2	5.09672	0	0	Crabp2	21.6933	0	0	Pcdh19	5.4144	0	0
2	Rspo3	7.77042	0	0	Slc2a3	5.63938	0	0	Sfrp1	4.07498	0	0	Foxc2	6.94337	0	0
3	Ifitm1	21.2108	0	0	Grsf1	7.33775	0	0	Map1b	3.31226	0	0	Aldh1a2	9.86306	0	0
4	Tbx6	4.51958	0	0	Bex4	8.35901	0	0	Pax6	5.6452	0	0	Arg1	6.70527	1.21636e-296	5.87037e-293
5	Dll3	4.83172	0	0	Bex1	8.54737	0	0	Slc2a1	6.97356	0	0	Tcf15	8.01051	1.2584e-288	4.55495e-285
6	Phlda2	15.777	0	0	Etv4	3.08236	0	0	Sox2	2.63088	0	0	Ifitm1	23.2125	1.78736e-278	5.17564e-275
7	Lef1	3.98834	0	0	Spint2	2.43304	0	0	Id2	4.53244	0	0	Dll1	4.67934	1.5524e-271	4.08662e-268
8	Fam212a	3.99853	0	0	Fgf8	4.30948	0	0	1700011H14Rik	7.13858	0	0	Gpc3	5.18192	3.14526e-262	7.00594e-259
9	Dll1	3.13827	0	0	Cdx4	3.65463	0	0	Spsb4	2.81478	0	0	Dll3	4.48009	2.21551e-261	4.58247e-258
10	Laptm4b	3.67398	0	0	Pmaip1	3.36023	0	0	Ccnd2	13.0223	3.35032e-281	2.69487e-278	Fn1	4.92438	7.42463e-245	1.34372e-241
11	Fgf3	3.62861	0	0	Tspan13	2.58007	0	0	Irx3	3.40406	3.44693e-272	2.5593e-269	Lef1	4.16677	6.66139e-220	1.13467e-216
12	Gpc3	3.98164	0	0	Cdx1	8.387	0	0	Sfrp2	2.89628	1.59338e-252	1.09856e-249	Smoc1	3.76867	2.84988e-211	4.34336e-208
13	Fn1	3.41528	0	0	Oat	2.64656	0	0	Meis2	1.96438	2.95361e-240	1.94381e-237	Foxc1	5.36142	6.22649e-209	8.58573e-206
14	Lmo2	3.24593	0	0	Hoxb8	3.10139	0	0	Cntfr	2.06301	2.82498e-228	1.77832e-225	Laptm4b	3.37288	8.42794e-171	9.38645e-168
15	Pdlim4	3.15149	0	0	Epcam	2.88731	3.69828e-308	5.9495e-305	Metrn	1.98352	1.03249e-211	5.64109e-209	Tbx6	2.61032	1.46892e-158	1.57539e-155
16	Hes7	3.50443	0	0	Epha5	3.96845	2.05697e-304	3.13493e-301	Pcbd1	2.27823	2.44441e-211	1.31079e-208	Cited1	4.1693	9.71802e-157	9.70361e-154
17	Ypel3	2.54336	0	0	Sp5	2.49719	5.18583e-285	7.50831e-282	Fabp5	4.65316	3.52605e-210	1.85643e-207	Pcdh8	5.62852	1.81973e-142	1.6998e-139
18	Hoxb1	2.94798	1.5649e-307	1.61839e-304	Pabpc1	11.2877	5.94258e-283	8.19425e-280	Cd24a	4.24	1.8751e-207	9.52586e-205	Epb41l3	2.94114	2.00397e-131	1.56835e-128
19	Pcdh19	2.48333	1.15789e-299	1.11764e-296	Cystm1	2.60798	3.05475e-281	4.02075e-278	Mdk	12.9055	2.12541e-207	1.06113e-204	Meis2	2.74424	1.81487e-128	1.34751e-125
20	Frzb	2.36334	1.2306e-297	1.11358e-294	Igfbp2	2.21819	3.10904e-277	3.75119e-274	Fgfr2	3.57714	9.05143e-205	4.44241e-202	Pdlim4	3.77596	1.45377e-115	9.56747e-113
21	Snai1	3.12335	2.90961e-293	2.55314e-290	Cxx1b	2.70675	1.85598e-267	1.9905e-264	Mest	3.59396	4.19539e-200	2.02476e-197	Crabp1	1.8175	3.08224e-112	1.89899e-109
22	T	1.86184	1.31832e-249	1.00459e-246	Mkrn1	2.09919	3.53341e-256	3.65418e-253	Fhl1	1.83929	1.0856e-186	4.83626e-184	Notch1	2.76232	8.7485e-105	4.36777e-102
23	Arg1	2.62055	2.46118e-228	1.73825e-225	Pou5f1	6.62991	1.04651e-251	1.04496e-248	Dek	4.59803	7.92887e-171	3.37641e-168	Aldoc	3.58392	1.53274e-102	7.39727e-100
24	Crabp1	0.992703	1.42929e-227	9.85427e-225	Fgf17	2.69939	4.15202e-248	4.00767e-245	Fgfbp3	2.15637	2.24714e-170	9.4305e-168	Rspo3	3.50401	1.37711e-99	6.32967e-97
25	Arl4d	3.45621	6.98024e-226	4.70062e-223	Eno1	10.867	2.28656e-234	2.06912e-231	Col18a1	1.71965	1.62231e-150	5.87216e-148	Rasgrp3	3.17088	1.63556e-97	7.40013e-95
26	S100a11	2.33519	3.54989e-213	2.23466e-210	Sema6a	1.90751	1.12897e-232	9.9065e-230	Hes3	2.11669	2.21113e-148	7.90466e-146	Fam212a	2.12562	3.87159e-97	1.72476e-94
27	Tpm1	4.42568	1.29756e-211	7.99434e-209	Apoe	2.59583	1.16804e-231	9.94794e-229	Cpn1	3.44673	4.14378e-143	1.46331e-140	Pth1r	2.92665	4.15539e-92	1.67122e-89
28	Fabp7	2.51648	1.51995e-205	9.16943e-203	Rasgrp2	2.1586	2.00712e-231	1.66057e-228	Irx5	3.22539	8.17814e-136	2.78605e-133	Nrarp	3.43302	5.93506e-87	2.12175e-84
29	Rftn1	3.05196	2.44781e-204	1.44656e-201	T	4.15341	3.84511e-229	3.00927e-226	Map2k6	1.66437	1.53212e-135	5.1588e-133	Cadm1	2.92822	1.22795e-86	4.28408e-84
30	Ifitm2	5.49571	6.57176e-187	3.73134e-184	Smim3	2.32976	1.22653e-228	9.34648e-226	Sparc	1.45999	7.52552e-133	2.47632e-130	Cited2	4.91948	1.06951e-84	3.55976e-82
31	Anxa5	1.81225	1.7476e-168	9.73179e-166	Tgif1	1.86752	7.40958e-226	5.50152e-223	Pls3	1.67406	7.61793e-133	2.47857e-130	Ddit4	2.26218	6.61529e-82	1.9954e-79
32	Rbp1	5.26967	1.1597e-163	6.33612e-161	Hoxaas3	6.74909	6.59276e-225	4.77267e-222	Fzd2	1.42652	1.96015e-127	6.16958e-125	Phlda2	7.90859	9.72337e-82	2.90268e-79
33	Dkk1	3.36936	5.95507e-161	3.13529e-158	Acer2	1.852	2.64431e-224	1.86759e-221	Sfrp5	5.55663	3.05517e-122	9.31248e-120	H19	7.53912	4.98763e-80	1.45886e-77
34	Maged2	1.77951	1.44435e-160	7.46859e-158	Snrpn	2.9023	3.51402e-223	2.42275e-220	Ndn	1.51485	7.49203e-122	2.25986e-119	Maged1	2.10176	1.27268e-79	3.6488e-77
35	Fgf15	1.68811	3.81333e-156	1.93724e-153	Rbbp7	3.62031	7.76241e-221	5.22735e-218	Idi1	1.61163	2.09204e-120	6.18155e-118	Igfbp4	1.82335	4.50737e-78	1.23132e-75
36	2610528A11Rik	2.79375	5.96075e-155	2.97595e-152	Nefm	2.72957	2.13506e-214	1.40511e-211	Tagln2	2.14069	4.3317e-120	1.25433e-117	Magi1	2.49612	1.07071e-71	2.62751e-69
37	Phlda1	2.05	1.13011e-154	5.54654e-152	Wfdc2	1.7473	8.3395e-212	5.36638e-209	Mif	20.2025	2.84415e-119	8.15425e-117	Ppp1r1a	3.13102	1.67351e-71	4.07225e-69
38	Chst7	2.03917	3.33704e-151	1.55856e-148	Ier2	1.72552	3.80058e-211	2.39247e-208	Pcsk9	2.601	7.68511e-112	2.13979e-109	Fgfr1	1.61488	4.27447e-66	9.23701e-64
39	Mogat2	1.68978	1.01588e-146	4.52567e-144	Epha1	2.14537	6.75701e-210	4.16303e-207	Mir124-2hg	4.66655	6.10368e-109	1.65182e-106	Foxp1	2.05698	1.03716e-65	2.2083e-63
40	Hoxaas3	3.96518	6.04691e-134	2.53769e-131	Lhpp	1.70355	1.26689e-209	7.64275e-207	Fam181b	3.04582	3.62549e-107	9.6315e-105	Prrx2	3.09129	7.45647e-65	1.55336e-62
41	Id1	2.98165	9.31056e-133	3.85151e-130	Cxx1a	1.83969	3.96246e-209	2.29482e-206	Tubb2b	1.87356	4.63535e-107	1.22024e-104	Maged2	1.51265	1.09299e-61	2.02882e-59
42	H19	2.89032	4.42106e-132	1.77807e-129	Slc2a1	3.66274	5.82206e-206	3.30567e-203	Tpi1	4.66434	2.58388e-105	6.62135e-103	Fbn2	3.03454	1.11172e-60	2.03747e-58
43	Aldh1a2	2.36131	1.84276e-130	7.2109e-128	Wnt5b	2.06143	4.71331e-205	2.62468e-202	Sox1	3.54569	5.93731e-105	1.50813e-102	Gas1	1.84103	1.45606e-60	2.65177e-58
44	Vim	1.85739	4.67586e-130	1.80532e-127	Tpd52	1.65795	8.97316e-205	4.90256e-202	Irx1	2.99598	4.62467e-102	1.15445e-99	Six1	4.18156	1.7128e-60	3.0806e-58
45	Efna1	2.239	1.17526e-129	4.47791e-127	Pim1	1.78797	1.61229e-202	8.48858e-200	Meis1	2.23018	2.63207e-99	6.35141e-97	Lmo4	2.44247	4.80743e-60	8.48834e-58
46	Gal	4.3209	7.34813e-129	2.72795e-126	Ccnjl	2.09625	4.03648e-196	2.08722e-193	Mcm7	1.84254	7.62637e-97	1.81014e-94	Pdgfra	2.28686	8.48465e-60	1.4712e-57
47	Sfxn1	1.96061	6.01286e-120	2.02459e-117	Gtf3a	1.51703	3.42458e-195	1.70975e-192	Baz1a	1.43982	1.62408e-96	3.79262e-94	Nkd2	2.91908	8.65478e-60	1.49176e-57
48	Tmsb10	12.4066	4.21976e-118	1.37294e-115	Fst	3.63476	1.54962e-193	7.60547e-191	Nrcam	4.0343	4.30186e-96	9.96552e-94	Sulf1	2.07042	1.11866e-56	1.71391e-54
49	Lpar1	1.58545	2.96887e-116	9.34452e-114	Dnmt3b	2.32742	5.93826e-193	2.86591e-190	Snrpf	2.94018	3.73377e-95	8.44678e-93	Capn2	2.08661	1.33649e-56	2.02621e-54
50	Pdgfra	2.38338	3.01637e-111	8.91277e-109	Pdgfa	1.65087	3.69461e-191	1.72556e-188	Flrt3	1.51984	1.06514e-94	2.39096e-92	Rnf213	2.50109	1.74585e-56	2.63306e-54
51	Nrarp	2.08113	1.82198e-110	5.22368e-108	Evx1	2.13103	7.77296e-190	3.57273e-187	Rprm	2.25304	5.63043e-91	1.20771e-88	Rbms1	1.77533	4.81671e-55	6.97387e-53
52	Gfra3	2.47696	4.70636e-108	1.3104e-105	Trh	3.76978	1.39305e-189	6.3029e-187	Odc1	2.11082	1.84756e-90	3.9338e-88	Hes7	1.82036	5.87347e-55	8.41971e-53
53	Cald1	1.53743	1.05928e-107	2.92128e-105	Set	10.867	1.19278e-182	5.31376e-180	Upp1	1.7652	2.83229e-90	5.98646e-88	Gnas	4.7002	4.83579e-53	6.48288e-51
54	Btg2	2.36456	3.54019e-104	9.40488e-102	Psip1	4.03497	1.44294e-180	6.2363e-178	Msmo1	1.54203	3.19612e-90	6.65828e-88	Car3	2.64037	1.18486e-51	1.52488e-49
55	Sp5	1.26317	5.5172e-103	1.45238e-100	Car14	1.56363	3.84832e-180	1.63876e-177	Rarb	3.35178	5.39423e-90	1.11572e-87	Greb1l	1.82338	4.85904e-50	5.88716e-48
56	Mum1l1	1.93757	1.75699e-97	4.46292e-95	Phlda3	2.21314	8.18309e-175	3.43417e-172	Rfx4	3.90402	6.72237e-89	1.38057e-86	Cald1	1.34306	6.35124e-50	7.66304e-48
57	Cd63	1.96405	2.14407e-96	5.35224e-94	Cdkn1a	2.28648	1.88811e-173	7.81055e-171	Efnb1	1.46368	3.54551e-86	7.08051e-84	Tenm4	1.80868	1.11794e-49	1.32673e-47
58	Lmo1	2.45536	1.19067e-95	2.94685e-93	Acot7	1.5338	3.64913e-173	1.48828e-170	Tshz1	1.8481	8.11576e-86	1.59869e-83	Hmga2	3.1221	2.54817e-49	2.98734e-47
59	Efna3	2.22021	2.74319e-94	6.67518e-92	Pfn1	14.3473	4.56333e-171	1.83528e-168	Fam181a	4.13944	3.60348e-85	7.05041e-83	Mesp1	3.19755	2.66795e-47	2.85077e-45
60	S100a10	1.83968	2.21585e-93	5.30285e-91	Hoxb9	1.87337	4.91206e-171	1.94847e-168	Frat2	1.57393	5.72951e-85	1.10606e-82	Tmsb10	13.5319	3.08709e-47	3.2865e-45
61	Sh3gl3	2.10371	3.98533e-92	9.30671e-90	Zfp428	1.78793	1.9125e-168	7.38402e-166	Zfand5	1.38848	2.20669e-84	4.20389e-82	Smarcd3	2.81571	1.61448e-46	1.65196e-44
62	Plxna2	2.29595	4.39798e-92	1.01882e-89	Nefl	2.12559	3.90555e-168	1.48807e-165	Ckb	1.8063	3.14323e-83	5.91029e-81	Pdzrn3	2.34988	2.3696e-46	2.39918e-44
63	Pea15a	1.34753	4.83257e-92	1.11061e-89	Hprt	1.99192	5.42323e-162	2.03949e-159	Igfbp2	1.89093	5.7278e-82	1.0632e-79	Clic4	1.75054	3.68576e-45	3.55762e-43
64	Dusp6	1.07915	1.23766e-91	2.79992e-89	Npm3	2.97857	3.80424e-155	1.39442e-152	Polr2f	1.91181	3.29896e-81	6.04608e-79	Pbx1	1.44591	1.36734e-44	1.28136e-42
65	Rasgrp3	2.33513	1.75081e-91	3.9301e-89	Apela	2.18232	9.22429e-155	3.33885e-152	Tmem47	1.15452	2.13242e-80	3.85927e-78	mt-Cytb	10.118	2.2624e-44	2.1065e-42
66	Rnf213	2.61153	9.0167e-91	2.00844e-88	Cxxc5	1.52599	2.00159e-154	7.15556e-152	Fez1	4.02416	1.99508e-79	3.54427e-77	Gstm5	1.828	2.45052e-44	2.27435e-42
67	Tpm4	1.77357	1.81575e-90	3.98324e-88	Greb1	2.00335	3.06906e-148	1.08379e-145	Atp2b1	1.18885	5.18714e-75	8.83554e-73	Hoxb1	1.53818	2.87903e-44	2.66352e-42
68	Ptk7	1.16098	6.62241e-90	1.42048e-87	Hes3	1.43661	7.53018e-148	2.62712e-145	Jam3	1.14976	8.08889e-75	1.36977e-72	H2afy	2.32925	5.52701e-44	5.04876e-42
69	Car3	1.94817	3.15822e-86	6.48601e-84	Mgst1	1.7082	1.91846e-147	6.61344e-145	Pfn2	1.13306	1.45882e-73	2.4418e-71	Calm3	1.79302	5.31432e-43	4.62122e-41
70	Tubb6	1.33879	1.55901e-83	3.09206e-81	Rxrg	2.54857	2.45858e-147	8.37567e-145	Zfp422	1.08959	3.70078e-72	6.15882e-70	Snai1	1.48002	1.19462e-42	1.02043e-40
71	Pdcd5	2.58313	3.62125e-83	7.08517e-81	Notum	2.56122	1.49894e-142	4.98906e-140	Eno3	1.26142	7.51312e-72	1.23612e-69	Marcks	2.48249	1.58517e-42	1.33436e-40
72	Pcolce2	2.0509	6.2924e-83	1.21473e-80	Evx1os	1.9149	3.80648e-140	1.25255e-137	Sox3	2.32087	8.28022e-72	1.35464e-69	Dusp9	1.55707	9.2651e-42	7.55745e-40
73	Fgf8	0.230829	5.73002e-82	1.08447e-79	Myl12b	1.44073	1.06648e-139	3.46988e-137	H2afy2	1.08407	9.22262e-71	1.50033e-68	Phlda1	1.39683	8.95841e-40	6.75543e-38
74	Peg3	1.18906	4.31942e-77	7.72083e-75	Cyp26a1	3.22848	2.56138e-139	8.2411e-137	Emid1	2.52693	1.43582e-70	2.32274e-68	Ptgds	4.18922	2.03487e-39	1.507e-37
75	Serpinh1	2.12236	3.42904e-76	6.01786e-74	Msx1	2.21488	2.31698e-137	7.37282e-135	Cdkn1c	1.32267	2.50214e-70	4.00301e-68	Tpm1	1.93078	3.29019e-39	2.39985e-37
76	Sct	3.84258	5.71224e-75	9.84579e-73	Apln	2.56015	6.04658e-136	1.90316e-133	Rcn1	1.05871	3.0352e-68	4.75083e-66	Mesp2	6.39435	5.70609e-38	3.9529e-36
77	Smoc1	1.45949	1.89438e-73	3.17084e-71	Cd24a	2.64473	3.15042e-134	9.80934e-132	Gpi1	1.30146	9.45905e-67	1.44161e-64	Hoxb3os	1.67931	1.85296e-37	1.2625e-35
78	Gnas	3.69854	2.15328e-73	3.58347e-71	Ezr	1.16282	7.7128e-134	2.37595e-131	Zfp36l1	1.05629	8.84232e-66	1.33358e-63	Frzb	1.13241	2.00489e-37	1.35644e-35
79	Dlc1	2.87451	4.95071e-73	8.09931e-71	Calm2	6.20994	4.90612e-131	1.49544e-128	Grb7	1.58706	1.22293e-64	1.82538e-62	Synm	4.76251	2.83337e-37	1.89046e-35
80	Adamtsl2	3.33412	4.17677e-69	6.46775e-67	Atp6v1f	1.81554	4.83468e-130	1.45831e-127	Higd1a	2.196	2.057e-64	3.039e-62	Lrig3	1.71168	2.14353e-36	1.38549e-34
81	Gng2	1.08477	3.71453e-67	5.60217e-65	Cenpx	1.52597	9.79229e-129	2.92325e-126	Rbm38	0.970448	2.12413e-64	3.12226e-62	Serpinh1	2.38814	2.18986e-36	1.41229e-34
82	Rab8b	1.50457	1.43933e-65	2.13737e-63	Rarg	1.69197	2.05224e-128	6.06396e-126	Irx2	2.69148	2.31051e-64	3.37906e-62	Wfdc21	6.51227	2.21543e-36	1.4256e-34
83	Epha4	1.16669	3.04318e-65	4.49599e-63	Bcat1	1.46785	6.36561e-126	1.84329e-123	Nr2f6	1.16696	2.90281e-64	4.20284e-62	Anxa5	1.27505	3.02184e-36	1.92739e-34
84	Naaa	1.21557	1.34902e-63	1.89629e-61	Dnaja1	4.43279	8.1659e-125	2.34119e-122	Rpl38	4.40634	6.48091e-64	9.3367e-62	Add3	1.80871	4.35151e-36	2.75124e-34
85	Nkd1	1.08878	1.53565e-63	2.1482e-61	Tceal9	3.48452	2.61566e-124	7.42565e-122	Nr2f1	4.46446	6.88883e-64	9.87523e-62	Zic3	1.44446	1.04208e-35	6.48934e-34
86	F11r	1.10753	4.94791e-63	6.8883e-61	Ptk7	1.14247	1.10269e-123	3.10006e-121	Cdca7	1.0506	1.14392e-63	1.63175e-61	Stra6	1.66417	6.41879e-35	3.89662e-33
87	Agtrap	1.51264	1.59724e-62	2.19201e-60	Stmn2	1.30132	1.26474e-123	3.52146e-121	Qk	1.44272	2.93717e-62	4.08902e-60	Mmp14	1.41882	8.60578e-35	5.18877e-33
88	Dact1	2.09175	1.99794e-61	2.70347e-59	Dut	4.09385	7.42276e-122	2.04706e-119	H2-Ke6	1.43916	4.48996e-61	6.16188e-59	Adgrl2	1.34888	1.0087e-33	5.80694e-32
89	Notch1	1.37456	2.24e-61	3.01692e-59	Armc10	1.12118	1.60393e-121	4.38159e-119	Rgma	1.13968	6.06146e-61	8.27933e-59	Rftn1	1.52932	2.01115e-33	1.13966e-31
90	Epb41l3	1.17569	4.25195e-61	5.6739e-59	Tceal8	6.49934	3.08278e-121	8.34281e-119	Gpx3	1.88472	1.01622e-60	1.38154e-58	mt-Nd4	9.92735	4.08779e-33	2.26329e-31
91	Hand1	3.73736	5.36039e-60	6.99193e-58	H2afz	19.791	1.63993e-120	4.39698e-118	Apba2	1.61043	4.05239e-58	5.35823e-56	Tfpi	2.24972	2.08952e-32	1.12049e-30
92	H2afy	1.65055	8.68467e-60	1.11275e-57	Isyna1	1.20065	8.20386e-119	2.17944e-116	Eml1	1.53309	4.70105e-58	6.18766e-56	Myl2	3.03505	2.35601e-32	1.25641e-30
93	Igfbp4	0.945406	1.37117e-57	1.6968e-55	Chchd10	1.43727	3.64375e-115	9.50558e-113	Vangl2	1.0888	6.63534e-58	8.6941e-56	Plxna2	2.02227	6.85741e-32	3.59728e-30
94	Cyb5a	1.23652	2.73381e-57	3.36863e-55	Bnip3	1.03647	7.81517e-115	2.02057e-112	Hes5	2.32588	1.50397e-57	1.94422e-55	Mid1ip1	1.74985	4.10607e-31	2.07866e-29
95	Limch1	1.63462	3.28354e-57	4.02888e-55	Ctbp2	1.21083	8.23547e-115	2.11039e-112	Nucks1	1.31087	7.07414e-57	9.06398e-55	Ntn1	2.62775	4.27159e-31	2.15868e-29
96	Aplnr	1.99569	4.42639e-57	5.40823e-55	Ifngr2	2.1408	1.51991e-114	3.86071e-112	Msi1	1.02099	8.26132e-57	1.05385e-54	Vim	1.28995	1.06817e-30	5.34215e-29
97	Hoxb2	1.02658	1.62812e-56	1.94816e-54	Calm1	6.36286	2.56918e-113	6.46919e-111	Psmg4	0.889647	8.40918e-57	1.068e-54	Sms	1.42133	1.34221e-30	6.65519e-29
98	Atp2c1	1.15049	2.11137e-55	2.47526e-53	Hoxc8	2.94814	5.94453e-113	1.48393e-110	Meis3	1.07388	6.52859e-56	8.2195e-54	Adgra3	1.26547	1.38468e-30	6.84234e-29
99	SEPT8	2.08462	6.73263e-55	7.82958e-53	Tmem59l	1.90405	9.75305e-111	2.41384e-108	Hbb-y	0.987258	4.68192e-55	5.81864e-53	Cndp2	1.25212	2.29249e-30	1.12324e-28

[truncated: 2 more sheets: Mouse_early&late (Figure 5E), EMT (supfigure9)]
