# Supplementary material for: Dynamics of primitive streak regression controls the fate of neuromesodermal progenitors in the chicken embryo
Source: eLife. 2021 Jul 6;10:e64819. doi: 10.7554/eLife.64819 (PMC8260230; doi:10.7554/eLife.64819)
Supplement: Supplementary file 3. — List of all the genes that are differentially expressed in the cells with the highest probability to transition to each cell type; the list is then filtered by a curated list of transcription factors. The fraction expressed ratio (second column) represents the variation of cell fraction that express each gene between the first and second timepoint used to infer the trajectories (days 1–3 for chicken data and E7.25–E9.5 for mouse data). The false discovery rate (FDR) column show the FDR (adjusted p-value) for each gene. [file elife-64819-supp3.xlsx]

## Sheet: Neural Tube
Gene	fraction_expressed_ratio	FDR
Dbx1	2.13257	0.000174997
Zic1	2.05136	6.86e-13
Arid3c	2.03485	3.52e-07
Olig2	2.03124	1.32e-06
Dbx2	2.01854	7.38e-07
Pou3f2	2.00609	2.5e-10
Sox21	1.99511	2.76e-11
Rarb	1.98316	0
Nr2f1	1.94834	0
Rfx4	1.93654	0
Msx3	1.92012	0
Pax6	1.87709	0
Irx1	1.87027	0
Neurog2	1.82249	5.28e-10
Irx2	1.81874	2.99e-09
Irx5	1.78461	0
Pou3f1	1.72698	1.39e-08
Meis1	1.69997	0
Nr2f2	1.65878	0.00365646
Irx3	1.61945	0
Meis2	1.55686	0
Sox3	1.53091	1.92e-06
Pbx3	1.50119	0.00130511
Sox2	1.48237	0
Glis2	1.4791	0.00147858
Pax3	1.44433	1.62e-07
Zic5	1.40677	0.00251004
Hes5	1.31362	0
Id3	1.30457	0
Nr2f6	1.21496	1.83e-11
Sox11	1.16982	4.32e-05
Jund	1.16842	2.13e-11
Hoxa2	1.15891	0.00426843
Id2	1.13891	2.67e-12
Meis3	1.13306	0.000235677
Hoxd4	1.12283	4.1e-11
Mycn	1.10503	0.000692583

## Sheet: NMP
Gene	fraction_expressed_ratio	FDR
Mnx1	2.38981	0
Hoxc10	2.00698	5e-06
Hoxa10	1.93571	0.000227928
Evx1	1.91075	0
Phox2a	1.90686	1.36e-11
Tlx2	1.8612	7.76e-05
T	1.76826	0
Cdx2	1.74645	0
Cdx1	1.68793	0
Hoxc9	1.62307	0
Etv2	1.60491	4.22e-07
Hoxa9	1.6006	0
Etv4	1.56823	0
Hes7	1.53032	0
Cdx4	1.49944	0
Etv5	1.49859	3.98e-10
Rarg	1.49297	0
Hoxc6	1.4806	0
Hoxd1	1.48031	2.38e-12
Foxo4	1.44615	0.000613276
Hoxc8	1.43185	0
Hoxa7	1.42423	0
Sp8	1.39464	2.26e-06
Hoxd9	1.37829	0.00143842
Sp5	1.36281	0
Ets2	1.36118	5.13e-07
Hoxb7	1.36054	4.78e-10
Arid3b	1.35862	0
Thra	1.35847	0.00142147
Msx1	1.32861	0
Hoxb8	1.32612	0
Hoxb9	1.31758	0
Hoxb6	1.30186	4.75e-07
Tgif1	1.2712	0
Hoxa3	1.21728	0.000397782
Hes1	1.17323	2.57e-11
Hoxc4	1.17051	4.59e-06
Id2	1.15138	3.61e-09
Hoxb1	1.10557	0.00171531

## Sheet: PSM
Gene	fraction_expressed_ratio	FDR
Foxc1	3.71053	0
Lhx5	3.39756	5.85e-07
Osr1	3.19535	0
Otx1	3.12545	3.03e-08
Mixl1	2.89278	8.25e-13
Snai1	2.71713	0
Six1	2.70503	2.19e-09
Foxc2	2.66525	0
Hoxd9	2.50458	0
Isl1	2.44661	2.25e-05
Hand1	2.32565	1.02e-10
Hoxd8	2.2834	2.41e-05
Lef1	2.18342	0
T	2.05591	0
Elk3	1.96	0.0054174
Ets2	1.87346	0
Hes7	1.85086	0
Msx2	1.80546	0
Hoxb1	1.74104	0
Hoxd1	1.60218	0
Sp5	1.58608	0
Phox2a	1.57681	7.09e-05
Evx1	1.50372	0
Cdx4	1.46671	0
Hoxb6	1.46336	0
Hoxc8	1.45871	0
Six4	1.45423	0.00370879
Hoxc9	1.44855	0
Hoxa9	1.41995	0
Hoxc6	1.41441	0
Cdx2	1.41128	0
Rarg	1.40207	0
Etv4	1.38769	0
Hoxa7	1.36321	0
Hoxb9	1.34189	0
Thra	1.34	0.00146314
Hoxa4	1.31925	7.19e-06
Etv5	1.31547	0.000503974
Tcf15	1.30848	8.94e-05
Hoxb8	1.3061	0
Hoxb7	1.28884	4.19e-06
Tcf7	1.27056	4.79e-06
Gbx2	1.24901	0.00817472
Arid3b	1.19275	5.2e-05
Tgif1	1.18076	3.19e-07
Hoxa3	1.17782	0.000285775
Ybx1	1.15783	0.00266921
Hoxb4	1.1546	4.34e-10
Hbp1	1.15082	0.00627947
Hoxc4	1.1464	6.78e-05
Hmga2	1.14064	1.54e-06
