# Supplementary material for: Dynamics of primitive streak regression controls the fate of neuromesodermal progenitors in the chicken embryo
Source: eLife. 2021 Jul 6;10:e64819. doi: 10.7554/eLife.64819 (PMC8260230; doi:10.7554/eLife.64819)
Supplement: Supplementary file 4. — We used the list of differentially expressed genes identified in Dias et al., 2020, Guibentif et al., 2021; Gouti et al., 2017; the top 350 genes of Table 5 from Guibentif et al., 2021. For the human gene list, we computed the list of DEG in the NMP cluster compared to the pluripotent stem cell cluster and took the 350 top genes from the Diaz-Cuadros et al., 2020 study. For the list identified in this study, the genes that were kept are those that have a false discovery rate (FDR) > 0.05. To maintain a comparable number of genes, we decided to take only the top 350 genes when more than 1000 genes had an FDR > 0.05. In this table, we also compared the newly identified gene from this study to the list of up- and downregulated genes from Wymeersch et al., 2019 providing from dissection of the node streak border NSB at E8.5 and the chordo-neural hinge CNH at E10.5 in mouse. The comparison of the different lists was done by using http://www.molbiotools.com/listcompare. For each analysis, we provide the matrix with the number of genes that are shared between two gene lists. We also provide the list of the shared items between all the lists and the gene list that intersect between two gene lists. [file elife-64819-supp4.xlsx]

## Sheet: Tables with NMP genes
This study				This study
Guillot_Chicken	Guillot_Mouse	Dias et al, 2020	Gouti et al, 2017	Guillot_Chicken	Guillot_Mouse	Gouti et al, 2017	Diaz-Cuadros et al, 2020
NMPearly	NMP early	Cluster 1 E8.0	Module 1 E8.5	NMPlate	NMP late	Module 2 E9.5	Mouse E9.5
CLDN1	POU5F1	CDH1	ALCAM	RASGRP3	HOXB5OS	ADAMTS9	SLC2A3
Wpkci-7	CDX1	CAR4	CAR3	HOXD12	HOXC9	AGO1	GREB1
PLPP1	LDHB	COL18A1	CDH1	CD99	GREB1	CGNL1	UCHL1
PRTG	FST	APOE	CDX1	HOXA9	HOXA9	CLDN9	SOX3
DRAXIN	PTMA	SLC2A3	DSG2	HOXA11	HOXC6	CYP26A1	HOXC10
NKAIN4	GRSF1	DUSP3	FABP7	SCD	HMGA2	EBF2	MKRN1
SP5	APOE	MAP2K1	FOXH1	HOXC9	GNAS	ETS2	PMAIP1
WNT8A	HPRT	SLC1A3	FRZB	HOXC10	PTMS	FAT3	SALL4
VRTN	ID3	KIT	FST	GREB1	H2AFY	FBN2	SOX2
NT5DC2	ATP5B	TRH	GNB1	WNT5A	NCAM1	FGF17	SLC2A1
EPCAM	EPCAM	PDK1	GRSF1	ACTG1	HBB-Y	FOXD1	CHD3
EPHA1	RBP1	ID3	ID3	S100A6	MLLT3	GCNT2	CDX2
TMSB15B	PFN1	WNT8A	IFIH1	HOXB5	TUBA1B	HES1	KCNAB3
CDH2	GPX4	PLS3	INA	ARL1	UCHL1	HOXA10	ARID3B
MT4L	NME1	GRB7	KIFC2	NREP	TUBA1A	HOXA7	SYT11
FN1	PHLDA3	ID2	LPAR4	STMN1	HOXC8	HOXA9	OAT
CACNG3	WFDC2	F2RL1	MOB1B	CCNI	PITRM1	HOXB5OS	PLAGL1
CTSZ	HOXA1	TDH	NKX1.2	SNX10	SLC2A3	HOXC10	HOXD11
CXCL14	SLC25A5	HES1	NR6A1	ENHO	LIX1	HOXC6	LIN28A
MPZL3	CXX1B	PLA2G7	NT5E	HOXA4	DAZAP2	HOXC9	ZIC5
MESP1	CITED2	ABCG1	POU5F1	PSMD1	SSBP2	HOXD10	HOXA10
HSP90AA1	EIF4A1	PMAIP1	PRTG	PDE6D	RPS23	HOXD11	WNT5A
AMY1A	RANBP1	CAMK2A	PTPRZ1	FSTL1	RPS28	HOXD3OS1	CCNJL
CFC1	BEX1	SLC16A3	RXRG	METTL6	SCD2	HOXD8	NUDT14
CNTN2	SRSF3	PODXL	SCN2B	ATF4	EEF1B2	HOXD9	NCAM1
MCAT	HNRNPA1	MCRIP2	UPP1	FGF18	ID2	HSD11B2	LDHA
DLL1	DNMT3B	PGM2	WNT8A	HOXD4	HOXA7	IGFBP5	IGFBP2
PMVK	ACER2	PDGFA	ZIC3	HOXD11	GRB10	KIF26B	NKX1-2
PLAC8L1	MRPL42	IFIH1		EEF1A1	HOXB9	LIMA1	IL17RD
BMP2	SP5	ITGA6		TUBAL3	IGF1R	LIMCH1	FOXD1
LIN28A	NUDC	RASSF2		ASB13	RPS27RT	LIX1	NIN
KRAS	CXX1A	RRAGD		DIXDC1	SMTNL2	LRP2	SCD2
MDK	DNAJA1	PDPN		BRI3	TUBB2B	MFAP4	JARID2
PPAT	SSSCA1	ALPL		chPKCI	FN1	MSMO1	ETV5
GJA1	H2AFZ	HES3		ARHGEF9	CYP26A1	MYO5B	TUBA1A
UCH-L1	HMGN1	TGFBR3		HDGF	FABP5	NSDHL	ACOT7
NUCB2	SNRPN	PTN		HAPLN1	WNT5A	PDE4D	CCND1
CD24	TSPAN13	RERG		JARID2	SOD1	PDK1	HOXA5
CACUL1	RPL8	TTYH1		OAF	HOXC10	PLAGL1	BEX4
MYLK	ATP5L	PAK1		MID1IP1	FGF17	SERINC5	SSBP2
AKR1D1	H3F3B	PIM2		H3F3C	ACTB	SLC19A2	HOXC6
LZTS1	ZFP428	ERAS		RPS15A	SULF2	SMOC2	PTK7
HTRA1	PSMA4	EFNB1		NUP205	PABPC1	SMUG1	LRP2
DHODH	ATP5C1	SLC7A3		HOXD8	BNIP3L	SOCS2	ENC1
ACOT7	NDUFS4	THY1		TXN	HBA-X	SPACA6	CELSR1
RAB3A	BCAS2	RASGRP2		HMGN4	PALLD	SPARCL1	KDM7A
TOMM20	CHCHD10	CIART		SOD1	DUSP6	STC2	FGF17
NFASC	NPM1	PCSK1N		CKAP2	SERF1	STRA6L	SMTNL2
MCRIP2	RAN	PHC1		FANCC	ARID3B	TPM1	MAP1B
AP1S3	PRDX6	ZIC5		FAU	PGK1	TRIL	ENO1
SP4	SUMO1	RAPGEF5		TPST1	CDH2	TRP53I11	MYCL
GXYLT2	NECTIN2	GM1840		TMEM123	NNAT	TUBA1A	PGK1
MT3	HMGB2	1700019D03RIK		TESC	MEST	UCHL1	HOXC9
LSS	EMB	2900011O08RIK		C9orf3	CHD3	WNT5A	HOXC11
GCHFR	RPS3A1	SOX3		HDGFL3	IGF2	ZBTB16	PCSK9
AIG1	SET	EPCAM		LGALS8	MAGED1		SFRP2
2021-09-09	CAR4	ZFP36L2		GULP1	CCNJL		CRABP2
ITPK1	LSM2	BST2		HOXA5	NEDD4		IFNGR2
AGRP	EIF1AX	FGFBP3		RPL27	RPS25		IGF1R
GJB1	TCEAL8	UTF1		CD3E	MT-ND3		HOXD10
MFGE8	RBBP7	NKX1-2		ATP5ME	GM10053		GLDC
ARL8BL	NEFM	CHCHD10		ARID1B	ATP5G3		MLLT3
DHDDS	SUB1	DTX3L		HOXC8	CKS1BRT		BNIP3
CKS1B	2700060E02RIK	ARL4C		HNRNPH2	YWHAZ		SOCS2
SELENOS	ATP5G1	PCDH1		FAM168B	ARID1A		LHPP
TSPAN13	UBE2N	EPP13		IGF1R	RPL27A		FABP5
B2M	FTL1	EML1		RPL26L1	NISCH		EPHA2
NOL11	NKX1-2	ZFP36L3		ANXA2	GM3839		CYSTM1
TSPAN16	BEX3	NECTIN2		PMP22	SSBP3		AGO1
EIF2AK3	ATP5F1	SEMA3E		RPL37A	IL17RD		HES6
CTSA	PPP4C	SCN2B		VIM	VCAN		PABPC1
LARP7	SUMO2	MCC		RPL29	PPP1CB		PSIP1
SPIN1W	NEFL	BNIP3		AP5M1	MAP1B		FOXB1
DPYSL3	NR6A1	APELA		SRGAP1	HOXC4		HOXA11OS
GNA11	ATP5O	B3GNT7		SEM1	RPL12		TUBB4B
XPR1	RPLP0	MKRN1-PS1		GARS	CDKN1C		RTN3
SENP5	DUT	C430049E01RIK		GLO1	IDI1		CYP26A1
SGK3	MRPL28	GM9176		ABHD18	WDR89		CIB1
Meis2a.2	NDUFA12			SALL1	RPL30		TPI1
IL6R	ATP5G2			SARNP	IFITM1		DTX4
RGN	GADD45GIP1			KLHL24	HNRNPA0		ZMYND8
HOXB8	HSP90AA1			HNRNPUL1	KPNB1		EZR
LACTB	SPC24			RPL35	NDN		PKM
DUSP14	EIF3M			DTNBP1	TPI1		TRP53I11
SMARCA4	RASGRP2			H2AFZ	PLAGL1		CNTFR
RMDN3	BEX4			ABRAXAS2	GNB1		GBX2
CHRD	MTCH2			ENO1	RPS20		COL2A1
EXOSC7	SRSF7			HOXC12	FASN		2010111I01RIK
CCDC88C	RANGRF			C12orf66	CHD4		HSP90AB1
TRARG1	PRMT1			LIFR	HNRNPH1		HOXC4
CYP1B1	HDAC1			GPX8	CD63		SALL3
DACT1	EEF1D			LYPD6B	HOXA10		DUSP6
PDZRN3	ECHS1			RPL11	SFRP2		BEX1
IRF6	POLR1D			MRPS17	FUS		ID2
PGM2	CCT5			CRTAC1	CTNNB1		TUBB2B
MYCL	PSMD6			ILKAP	ANP32E		TSPAN7
URB1	EIF3F			REEP5	RPS24		PITRM1
MRPS35	TRH			POU2F1	UBC		CD24A
ST14	PSMA7			PGAM1	SOX11		HES3
EIF2S2	PPIH			COTL1	GM26909		LIX1
SPARC	MRPL18			ZEB1	UNC13D
DTX3L	NHP2			IGFBP2	CS
ANKMY2	BTF3			UBE2E2	TXN1
RASGRP1	RPL6			ATF6	CNOT6
ABCC6	PSMB6			RIPK2	SALL1
ZNF518A	TPM3			PCBD1	IGF2BP3
EDNRB	EMG1			RPL8	HNRNPAB
PAICS	RPS3			SRSF7	AKT1
VASH1	EIF3G			ID3	PBRM1
FBXO5	MEG3			RBM24	HOXD11
ABCE1	BCAT1			PSMD7	SERPINH1
COL1A2	RPL7A			AP2M1	IPO5
BF1	COPS6			ACAP2	MAPK1IP1L
DAZAP1	TAF7			CTNNB1	AGO2
CDX1	STOML2			TIMP3	BNIP3
AGRN	PSMA6			CORO1B	YBX3
CTSD	SELENOH			ALDH7A1	MCM7
GFPT2	PIM2			BID	MSL1
GART	RPL9			ATP5MF	TTC3
IVNS1ABP	BRIX1			HOXA10	CSDE1
CASR	GM10076			HEXB	PRELID2
SLC7A5	TALDO1			MATR3	ACOT7
WBP4	IMPDH2			TALDO1	SLC25A4
ORAI2	CCT4			IFRD1	BANF1
KRT7	RPL19			COL4A1	PHF10
TIMM21	PSMB2			RAB5C	NSD1
FYCO1	BCCIP			GNAI3	EIF4G2
Pou5f3	ATP5E			ING3	PRPF8
ELMOD1	RPS8			COX7C	NAAA
CASP7	ELOF1			RAB11B	UBA1
MTF1	HMGB1			RRM1	SREBF2
TMPRSS9	RPLP1			WSB1	PDK1
GDPD5	RBM42			FBLN1	2010107E04RIK
YRDC	MALAT1			MAPRE2	ACTN1
ABCA2	ANP32A			AZIN1	HOXA5
NRXN1	PSMB3			MSX1	OLFR354
GBX2	EEF1AKMT1			RAMAC	RPS21
XPO4	LSM3			DUT	PTPRF
DNAJC17	ATOX1			TOMM6	TRP53I11
C25H1ORF43	PSMC5			BAZ1B	SYT11
PTPRO	EIF2S1			MKRN1	HNRNPD
C12orf10	PSMB7			UBE2Q2	CYSTM1
NCAPH	CALM2			CTGF	YWHAB
CDH1	SPINT2			DCTN3	NOC2L
STK26	PPP1CA			PCNP	DDX3X
RBBP8	RPL36			GNG5	DHX9
SOX17	RXRG			AK1	GTF2I
DNAJC11	ECI1			CPNE2	KDM7A
RDH10	FTH1			BTF3	P4HB
SUCLG2	PHLDA2			RPL23A	AGO1
ALDH5A1	TGIF1			TPRG1L	CCND3
KANK1	LYAR			GNPDA2	RAD21
NBN	RPL18A			RASL11B	CSRP2
CD2AP	YWHAQ			JMJD4	PTBP1
HIF1A	TIMM13			SVBP	HOXD4
COX18	RPS4X			CTHRC1	CBX3
ETV1	OARD1			RALGPS2	MCM6
DIRC2	APLN			SUGP1	MDK
NRG4	FGFBP3			TRA2A	GDF11
DUSP19	UPP1			CALML4	CBX5
BEND6	TXNL4A			METTL9	HES1
NMRAL1	ECHDC2			FANCL	USP22
EIF4EBP3	CNPY2			EIF3H	HMGCS1
GALNT6	DEK			PSMD2	KHSRP
SLC29A4	FKBP3			C13H5orf15	SLC38A2
COL1A1	BAX			NAXD	YWHAG
SCGN	RPS19BP1			DUSP23	6330403K07RIK
TRIM35	HOTAIRM1			CLPTM1	ZMIZ1
GSG1L	CBR1			TCF12	TNFAIP1
SLC35A5	ATP5H			AIFM1	RPL38
EBF4	EXOSC3			ZNF423	SLC39A6
PYCR3	RPL11			CHST15	RCOR2
HIST2H3L	NDUFA10			BRSK2	WDR6
ESCO1	RBPMS2			MRPS16	44441
ST3GAL1	PFDN5			LRRC20	CSE1L
MGAT1	GRPEL1			ATP5A1Z	ZFP422
NIPBLL	DCUN1D5			XPO1	RNPS1
CNTNAP1	RPL35			SULT1B1	PRELID1
EGFL7	NDUFS8			TTC7B	TUBB5
HARS	ANXA7			PTP4A1	ETS2
CNR1	ETFA			PSMB4	MYH10
DNMT3A	EXOSC5			SAT1	44450
PHF10	RPL24			ITGAV	DYNLL2
PISD	COA3			GPR107	EGLN1
CASD1	RPL3			FUBP1	FOXD1
BCAT1	FKBP11			WNT3A	WDR26
MAP1LC3A	CRIP2			FGF13	TNKS2
GLTP	NOP10			CDK2AP1	H19
CORO1C	REXO2			ZNF207	FLNA
LDLRAP1	TOMM20			COMTD1	DDX17
ALDH1A2	LRPAP1			H2AFV	CCND1
RRAGB	SRA1			BIRC2	ZC3H7B
LTA4H	MRTO4			TIMMDC1	TMEM132C
LMO1	GMPS			SLC35C1	EIF4B
TNNC1	RBM8A			ANP32B	MAGED2
DHCR24	LSM7			CRYAB	RPRM
SEMA3A	MRPS14			NFIL3	ACTG1
APOA1	RPL29			CCDC93	PTGES3
PIK3CB	RPS9			POMT1	PDCD5
PPP6R2	PPID			WLS	CYP51
DDX20	CLPP			RACK1	SRP54B
NR2C1	RPL27			TUBA1B	CSNK2A1
PLIN4	HSP90B1			YBX3	KIF26B
SLC29A1	DKC1			PYM1	HPGDS
OPTN	ATPIF1			THOC7	TOP2B
TMEM192	SUPT4A			CBX3	TCF12
SLC39A9	HSP90AB1			MBNL3	MPRIP
PANX2	GLRX3			EWSR1	DPYSL2
PARN	MRPL11			CENPX	USP50
MARCKSL1	TOMM22			ATP5MC3	MAP4K4
CDH11	CDH1			SKA2	ATXN7L3B
SLC34A2	PSMC4			HP1BP3	ADPRH
PMS2	MRPS34			CABP1	RAC1
PDHB	EEF1G			BRD2	CLIC4
AKAP8L	PRDX2			XRCC5	CLTC
TAF7L	C1D			UFM1	USP19
ADH6	USE1			TSN	NOCT
KRT18	APELA			DYNLL2	QK
RPUSD1	TDH			SMAD6	EEF1A1
CAMK2B	IDH3A			INTS7	CSNK1E
SLC4A8	EPOP			PPIA	MT-CO2
SHTN1	HYPK			RASL11A	FOXB1
ENPP2	TDP2			PSMD4	2610528A11RIK
PLA2G6	RPL36AL			GPC1	MEX3A
CALN1	SNRNP40			KDELR3	TMEM123
COL14A1	EIF3K			TIMM50	PURB
CD80	SYNGR2			XBP1	LLGL1
C1QTNF6	RPS27			TIA1	IMPAD1
THSD1	ZNHIT1			YWHAG	SPATS2
PAK3	MRPL34			PPEF1	ITCH
SFRP5	SF3B5			TCP1	DHX15
PKD2	RPL13			TNFRSF19	ATP2A2
PTPN3	UQCR10			UBTF	GLI3
gga-mir-1608	EIF3E			MSX2	ZFP503
SOD3	NDUFS7			C11orf52	CCDC50
ABCG1	GLO1			WDR34	TNRC6A
AMPH	LSM4			SUV39H2	CAPRIN1
NRCAM	DPH3			ANKRD10	HOXD9
TPD52L1	STARD3NL			HDGFL2	PGD
NTN3	ATP6V0E			ACTB	SOX3
ADGRG1	CTSZ			MXD1	RPL23
ETNK1	VAPA			CALD1	2010111I01RIK
DMAP1	MRPL21			HNRNPA2B1	SPIN1
AGXT2	WNT8A			PARK7	MARCKS
CUX2	SMDT1			YBX1	MTA1
NANOS1	MRPL40			PREP	HBB-BH1
OASL	EIF6			WARS	PLAGL2
ACACA	SLBP			TLE4	RNF220
PDGFA	POLR2E			TDG	AK4
CACNG5	PYM1			AGA	MSMO1
POLG2	IGFBP2			NIPA1	HMGCR
C1GALT1C1	CARNMT1			HSBP1	CAND1
CCNB2	EXOSC7			GKAP1	FADS1
VTN	BEX2			HMGB3	SF3B3
DUS1L	PLP2			SEC14L1	GPC3
CRABP-I	TOMM40			EEF1D	PTK7
RIPK1	CDC20			WDR41	MOB1A
MAL2	TSFM			NOG	NSD2
TMCC3	EIF3J1			RTN1	MTCH1
NME4	TIMM8A1			KDM5B	POLR2A
ANKRD66	HMGN2			PRDX3	POM121
KPNA6	RPL28			CLSTN1	IGF2BP1
PPIF	MRPL24			PGAP2	GOLM1
CHST3	SUGT1			GDPD1	TRIM2
PCYT1B	RPS2			HMGB2	NREP
PFKL	CNBP			HMGB1	CT573034.3
NOV	FRZB			ARAP2	DNMT1
PKIB	NACA			SRSF6	COL2A1
MTDH	PITHD1			SWAP70	TPM4
MDM2	HSPD1			MID1	UBE2Q1
GABRG2	ADRM1			GLIPR2	HOXB3
ABHD17A	SELENOW			CCNL1	DOCK7
SIKE1	RPLP2			YWHAZ	MT-ND6
ATP5C1	DDT			CLTA	SOX2
TCOF1	TMEM59L			RCN2	FIGNL2
SSH2	VPS29			NMRK1	CIB1
GTSE1	AURKAIP1			GAPDH	KMT2E
GM2A	KRT18			MGST3	GM10260
ARSA	UBE2K			TMEM199	SMAD4
DPYSL4	MRPL17			SNX1	NRARP
ASCC1	RPS12			IGFBP4	ELP2
COPS5	NAA20			DHX37	ARID3A
MSGN1	MRPL12			RNF10	NUCKS1
SEMA6B	UCHL3			AKR1B10L1	ENC1
CARMIL1	NUP43			PHLDA2	HK2
ANKRD17	SDHB			CA9	RASL2-9
MED21	PPIG			SOBP	HCFC1
GATA2	STX3			FGD3	SRRM2
TMEM39A	RPL14			RBM5	LDHA
DCAF13	GNG3			GJC1	LIMCH1
WDR77	UBB			SPIN1Z	HOXD10
PANK1	KHDRBS1			SPATS2	SPARCL1
CNN2	YWHAH			GNG10	TCEA1
LRRFIP2	ITM2B			RAB22A	IDH2
SPOPL	MPLKIP			PSMD13	SOCS2
ERMARD	SLC7A3			PNISR	IGF2BP2
NSG1	TCEAL9			SLC25A14	APPBP2
ATP13A3	FCF1			HSP90AB1	EIF4G1
TLCD2	RPL41			IGHMBP2	PAFAH1B2
PPRC1	RSL1D1			SRGAP3	TJP1
TTC39A	ZFAND6			ENPP4	ACO2
LRRC3B	DDX39			SERBP1	PRRC2B
ATP5MC1	SSR2			TFB2M	SFPQ
NOL8	ARF5			TXNDC5	TCF4
BUD31	ARXES1			FBP2	P3H3
ACBD3	RUVBL2			CYTL1	PTPA
TMEM69	NDUFA13			VCP	ILF3
CHCHD4	RPS13			CHN1	IGSF9
HSD17B10	PID1			NIFK	KLHL9
MSMO1	VBP1			SFPQ	ADGRA3
TNFAIP8L3	BRMS1			MRPL12	SUPT16
CRHBP	UQCC3			PDS5B	TRIL
TUBD1	ARL6IP5			NDUFS6	TNPO1
ADSS	UBE2S			NBL1	IFNGR2
TRIM71	ETV4			SLC49A3	CENPV
TBC1D8	FAM92A			L2HGDH	HEG1
RMND1	RPS15			MPV17	ENY2
RAN	CENPX			ERI2	PTP4A2
SNCAIP	NDUFA8			N6AMT1	TAB2
DHRS3	PSMC6			PTPRM	CELSR1
GCSH	MRPL23			TBCA	LDLR
C4	EIF1			EMC1	FAT1
C12orf43	ARPP19			RUFY3	TRIM28
TAGLN	GTF2E2			EIF3E	RBM15B
GNL2	RRP15			RBM45	FEM1B
SRD5A2	ACP1			SLC25A3	BRI3BP
LRRFIP1	DTD1			KCTD1	JUND
AGPAT3	UBE2D3			LVRN	SON
CCDC149	RWDD1			WASF3	ARID2
SNX5	RPL26			OSBPL7	STT3B
POU2F3	CDX2			HOXB13	GJC1
EXFABP	CAPZA2			CHAC1	AUTS2
MAP7	MRPL58			MRPL50	LASP1
PIN1	FABP7			GNPDA1	EID1
PHLPP1	GCSH			SSU72	PRKAG2
LITAF	TMEM165			TRAPPC6B	IER5
MCF2L2	BST2			WDR76	ARCN1
KIAA1671	PAM16			SRPRA	RPL10-PS3
GATA5	PSMA2			AP5S1	BPTF
ABCF2	VDAC3			HBM	AP1M1
KIF7	ALKBH7			FLT4	RNF145
ASIP	G3BP1			CYP39A1	NIN
ATP8B2	RPL21			SNRPE	CELF1
PLA2R1	TMEM256			PSMC2	UBN2
ABL2	OAZ1			ARPP19	ITGB1
BLVRA	FAM96A			AP3M2	EHMT1
PLXNA2	UQCRC1			FBXO9	MT-ND2
BEST4	MRPL54			COLEC12	DDAH2
KDM2A	PPIB			STON1	SEMA3A
AFG1L	PIGX			HNRNPA3	HNRNPA2B1
AKAP11	PSMG1			ZCCHC8	PCBP1
RGS10				CHRAC1
R3HCC1L				GTF2E2
PHYHIPL				TAF12
RNLS				HNRNPR
MAP3K1				BABAM2
TAF4B				ALDH4A1
FGF22				AHSA2
TCF7L1				SNRPB2
MYH7				PEX16
FAIM2				ANXA5
FRS3				RHEB
MYO9A				CCNL2
MRC1				H2AFY2
NAA10				STIL
MYSM1				RBM33
SYT12				TOP2A
EYA1				EIF2AK1
SLC38A10				CAND1
UBA5				TRAFD1
UBASH3B				USP46
DOCK10				RAD23A
DHX8				ABRACL
DGKI				MTURN
LMBR1L				RPL4
DAB2IP				SRSF4
CNTF				UBE2S
PAN3				LEPROTL1
CLMN				NDUFB4
VPS37B				ST3GAL2
CD36				MCM5
CAV3				PRPF6
HYAL2				PTGR1
MAK16				MRPL1
CPN1				HNRNPH3
FAM234B				FGFR1OP2
IFT20				HNRNPAB
MYL9				ITGB1BP1
CDX4				WDHD1
ACSF2				AGBL1
ARL5B				PHACTR1
ADI1				FAM45A
CHORDC1				PSMC5
NT5C2				HENMT1
HDAC1				RGS17
PTPN2				NFU1
PDK1				FYN
TACC3				MAP1LC3B
CGNL1				DCBLD2
USP19				CETN3
RAB35				ANKRA2
				MRPL37
				MMADHC
				DAZAP2
				TMEM267
				HOXB9
				LTF
				ATP5F1D
				NDFIP1
				CYB5A
				IST1
				RIC8A
				IL17RD
				EEF2
				SNRPN
				SPRY2
				CCDC80
				CTH
				GRB2
				MBTPS1
				H3F3B
				ADA2
				SMARCA2
				CMC4
				VAV3
				B3GNT7
				ERCC5
				RNF2
				ELK3
				TPM4
				DHRS4
				EIF5
				CTBP1
				SRSF2
				YTHDC1
				DCAF12
				MAPK6
				COPS2
				MCRS1
				MCPH1
				SDR42E1
				HIST1H46L2
				FSIP1
				MLLT10
				PRLR
				PTPRZ1
				YPEL1
				C1H12ORF57
				CXCR4
				FAM210A
				MZT1
				FGF1
				RPP25L
				SLC18B1
				YWHAB
				COL3A1
				WDR5
				COQ8B
				CDC42SE1
				FARP2
				RNASEH2B
				POFUT1
				NDUFS4
				ISOC1
				VPS13C
				EIF4EBP2
				MCM3
				SLC25A16
				PTPN6
				RHOA
				GGPS1
				WBP1
				PLOD1
				UBE2H
				ACAT1
				IP6K2

## Sheet: Early vs Late NMPs Analysis
Item	Occurences	Present In									Lane1	Guillot_Chicken NMPearly ∩ Guillot Mouse NMP early	Guillot_Chicken NMPearly ∩ Dias_NMP (Cluster 1 E8.0 )	Guillot_Chicken NMPearly ∩ Gouti NMP (module 1 E8.5 )	Guillot_Chicken NMPearly ∩ Guillot_Chicken NMPlate	Guillot_Chicken NMPearly ∩ Guillot Mouse NMP late	Guillot_Chicken NMPearly ∩ Gouti NMP (module 2 E9.5 )	Guillot_Chicken NMPearly ∩ Diaz-Cuadros_mouse (E9.5)	Lane2	Guillot Mouse NMP early ∩ Dias_NMP (Cluster 1 E8.0 )	Guillot Mouse NMP early ∩ Gouti NMP (module 1 E8.5 )	Guillot Mouse NMP early ∩ Guillot_Chicken NMPlate	Guillot Mouse NMP early ∩ Guillot Mouse NMP late	Guillot Mouse NMP early ∩ Gouti NMP (module 2 E9.5 )	Guillot Mouse NMP early ∩ Diaz-Cuadros_mouse (E9.5)	Lane3	Dias_NMP (Cluster 1 E8.0 ) ∩ Gouti NMP (module 1 E8.5 )	Dias_NMP (Cluster 1 E8.0 ) ∩ Guillot_Chicken NMPlate	Dias_NMP (Cluster 1 E8.0 ) ∩ Guillot Mouse NMP late	Dias_NMP (Cluster 1 E8.0 ) ∩ Gouti NMP (module 2 E9.5 )	Dias_NMP (Cluster 1 E8.0 ) ∩ Diaz-Cuadros_mouse (E9.5)	Lane4	Gouti NMP (module 1 E8.5 ) ∩ Guillot_Chicken NMPlate	Gouti NMP (module 1 E8.5 ) ∩ Guillot Mouse NMP late	Gouti NMP (module 1 E8.5 ) ∩ Gouti NMP (module 2 E9.5 )	Gouti NMP (module 1 E8.5 ) ∩ Diaz-Cuadros_mouse (E9.5)	Lane5	Guillot_Chicken NMPlate ∩ Guillot Mouse NMP late	Guillot_Chicken NMPlate ∩ Gouti NMP (module 2 E9.5 )	Guillot_Chicken NMPlate ∩ Diaz-Cuadros_mouse (E9.5)	Lane6	Guillot Mouse NMP late ∩ Gouti NMP (module 2 E9.5 )	Guillot Mouse NMP late ∩ Diaz-Cuadros_mouse (E9.5)	Lane7	Gouti NMP (module 2 E9.5 ) ∩ Diaz-Cuadros_mouse (E9.5)
WNT8A	4	Guillot_Chicken NMPearly, Guillot Mouse NMP early, Dias_NMP (Cluster 1 E8.0 ), Gouti NMP (module 1 E8.5 )										WNT8A	WNT8A	WNT8A		USP19	PDK1	MYCL		WNT8A	WNT8A	UBE2S			NKX1-2		WNT8A	ID3	SOX3	PDK1	ZIC5		ID3	GNB1				YWHAZ	WNT5A	WNT5A		WNT5A	WNT5A		WNT5A
WNT5A	4	Guillot_Chicken NMPlate, Guillot Mouse NMP late, Gouti NMP (module 2 E9.5 ), Diaz-Cuadros_mouse (E9.5)										TSPAN13	PGM2	PRTG		SEMA3A	MSMO1	LIN28A		TRH	UPP1	TALDO1			IGFBP2		SCN2B	B3GNT7	SLC2A3	HES1	SOX3		PTPRZ1					YWHAG	HOXD8	MKRN1		UCHL1	UCHL1		UCHL1
PDK1	4	Guillot_Chicken NMPearly, Dias_NMP (Cluster 1 E8.0 ), Guillot Mouse NMP late, Gouti NMP (module 2 E9.5 )										TOMM20	PDK1	CDX1		PHF10	CGNL1	GBX2		TDH	RXRG	SRSF7			HSP90AB1		IFIH1		PDK1		SLC2A3							YWHAB	HOXD11	JARID2		TUBA1A	TUBB2B		TUBA1A
ID3	4	Guillot Mouse NMP early, Dias_NMP (Cluster 1 E8.0 ), Gouti NMP (module 1 E8.5 ), Guillot_Chicken NMPlate										SP5	PDGFA	CDH1		PDK1		ACOT7		SLC7A3	POU5F1	SNRPN			CDX2		ID3		ID2		PMAIP1							YBX3	HOXC9	IL17RD		TRP53I11	TUBA1A		TRP53I11
HOXD11	4	Guillot_Chicken NMPlate, Guillot Mouse NMP late, Gouti NMP (module 2 E9.5 ), Diaz-Cuadros_mouse (E9.5)										RAN	MCRIP2			MSMO1				RASGRP2	NR6A1	RPL8			BEX4		CDH1		HES1		NKX1-2							WNT5A	HOXC10	IGFBP2		TRIL	TRP53I11		SOCS2
HOXC9	4	Guillot_Chicken NMPlate, Guillot Mouse NMP late, Gouti NMP (module 2 E9.5 ), Diaz-Cuadros_mouse (E9.5)										KRT18	EPCAM			MDK				PIM2	ID3	RPL35			BEX1				BNIP3		ID2							TUBA1B	HOXA9	IGF1R		SPARCL1	TPI1		PLAGL1
HOXC10	4	Guillot_Chicken NMPlate, Guillot Mouse NMP late, Gouti NMP (module 2 E9.5 ), Diaz-Cuadros_mouse (E9.5)		Lane 1								HSP90AA1	DTX3L			FN1				NKX1-2	GRSF1	RPL29									HES3							TPM4	HOXA10	HSP90AB1		SOCS2	SYT11		LRP2
HOXA10	4	Guillot_Chicken NMPlate, Guillot Mouse NMP late, Gouti NMP (module 2 E9.5 ), Diaz-Cuadros_mouse (E9.5)										HDAC1	CDH1			CDH2				NECTIN2	FST	RPL27									BNIP3							TMEM123		HOXD11		PLAGL1	SSBP2		LIX1
CDH1	4	Guillot_Chicken NMPearly, Guillot Mouse NMP early, Dias_NMP (Cluster 1 E8.0 ), Gouti NMP (module 1 E8.5 )										GCSH	ABCG1			ACOT7				ID3	FRZB	RPL11																TCF12		HOXC9		PDK1	SOX3		HOXD11
UCHL1	3	Guillot Mouse NMP late, Gouti NMP (module 2 E9.5 ), Diaz-Cuadros_mouse (E9.5)		Lane 2								EXOSC7								FGFBP3	FABP7	PYM1																SPATS2		HOXC10		MSMO1	SOX2		HOXD10
TUBA1A	3	Guillot Mouse NMP late, Gouti NMP (module 2 E9.5 ), Diaz-Cuadros_mouse (E9.5)										EPCAM								EPCAM	CDX1	PSMC5																SOD1		HOXA5		LIX1	SOCS2		HOXC9
TRP53I11	3	Guillot Mouse NMP late, Gouti NMP (module 2 E9.5 ), Diaz-Cuadros_mouse (E9.5)										CTSZ								CHCHD10	CDH1	PHLDA2																SFPQ		HOXA10		LIMCH1	SMTNL2		HOXC6
SOX3	3	Dias_NMP (Cluster 1 E8.0 ), Guillot Mouse NMP late, Diaz-Cuadros_mouse (E9.5)		Lane 3								CDX1								CDH1		NDUFS4																SALL1		GREB1		KIF26B	SLC2A3		HOXC10
SOCS2	3	Guillot Mouse NMP late, Gouti NMP (module 2 E9.5 ), Diaz-Cuadros_mouse (E9.5)										CDH1								CAR4		MRPL12																NREP		ENO1		HOXD9	SFRP2		HOXA10
SLC2A3	3	Dias_NMP (Cluster 1 E8.0 ), Guillot Mouse NMP late, Diaz-Cuadros_mouse (E9.5)										BCAT1								BST2		IGFBP2																IL17RD				HOXD11	SCD2		FOXD1
PLAGL1	3	Guillot Mouse NMP late, Gouti NMP (module 2 E9.5 ), Diaz-Cuadros_mouse (E9.5)		Lane 4								ATP5C1								APOE		ID3																IGF1R				HOXD10	PTK7		FGF17
NKX1-2	3	Guillot Mouse NMP early, Dias_NMP (Cluster 1 E8.0 ), Diaz-Cuadros_mouse (E9.5)																		APELA		HSP90AB1																HOXD4				HOXC9	PLAGL1		CYP26A1
MSMO1	3	Guillot_Chicken NMPearly, Guillot Mouse NMP late, Gouti NMP (module 2 E9.5 )																				HMGB2																HOXD11				HOXC6	PITRM1		AGO1
LIX1	3	Guillot Mouse NMP late, Gouti NMP (module 2 E9.5 ), Diaz-Cuadros_mouse (E9.5)		Lane 5																		HMGB1																HOXC9				HOXC10	PGK1
IL17RD	3	Guillot_Chicken NMPlate, Guillot Mouse NMP late, Diaz-Cuadros_mouse (E9.5)																				H3F3B																HOXC8				HOXB5OS	PABPC1
IGFBP2	3	Guillot Mouse NMP early, Guillot_Chicken NMPlate, Diaz-Cuadros_mouse (E9.5)																				H2AFZ																HOXC10				HOXA9	NIN
IGF1R	3	Guillot_Chicken NMPlate, Guillot Mouse NMP late, Diaz-Cuadros_mouse (E9.5)		Lane 6																		GTF2E2																HOXB9				HOXA7	NCAM1
ID2	3	Dias_NMP (Cluster 1 E8.0 ), Guillot Mouse NMP late, Diaz-Cuadros_mouse (E9.5)																				GLO1																HOXA9				HOXA10	MLLT3
HSP90AB1	3	Guillot Mouse NMP early, Guillot_Chicken NMPlate, Diaz-Cuadros_mouse (E9.5)																				EIF3E																HOXA5				HES1	MAP1B
HOXD10	3	Guillot Mouse NMP late, Gouti NMP (module 2 E9.5 ), Diaz-Cuadros_mouse (E9.5)		Lane 7																		EEF1D																HOXA10				FOXD1	LIX1
HOXC6	3	Guillot Mouse NMP late, Gouti NMP (module 2 E9.5 ), Diaz-Cuadros_mouse (E9.5)																				DUT																HNRNPAB				FGF17	LDHA
HOXA9	3	Guillot_Chicken NMPlate, Guillot Mouse NMP late, Gouti NMP (module 2 E9.5 )																				CENPX																HNRNPA2B1				ETS2	KDM7A
HOXA5	3	Guillot_Chicken NMPlate, Guillot Mouse NMP late, Diaz-Cuadros_mouse (E9.5)																				BTF3																GREB1				CYP26A1	IL17RD
HES1	3	Dias_NMP (Cluster 1 E8.0 ), Guillot Mouse NMP late, Gouti NMP (module 2 E9.5 )																				ARPP19																GJC1				AGO1	IGF1R
GREB1	3	Guillot_Chicken NMPlate, Guillot Mouse NMP late, Diaz-Cuadros_mouse (E9.5)																																				EEF1A1					IFNGR2
FOXD1	3	Guillot Mouse NMP late, Gouti NMP (module 2 E9.5 ), Diaz-Cuadros_mouse (E9.5)																																				DYNLL2					ID2
FGF17	3	Guillot Mouse NMP late, Gouti NMP (module 2 E9.5 ), Diaz-Cuadros_mouse (E9.5)																																				DAZAP2					HOXD11
EPCAM	3	Guillot_Chicken NMPearly, Guillot Mouse NMP early, Dias_NMP (Cluster 1 E8.0 )																																				CTNNB1					HOXD10
CYP26A1	3	Guillot Mouse NMP late, Gouti NMP (module 2 E9.5 ), Diaz-Cuadros_mouse (E9.5)																																				CBX3					HOXC9
CDX1	3	Guillot_Chicken NMPearly, Guillot Mouse NMP early, Gouti NMP (module 1 E8.5 )																																				CAND1					HOXC6
BNIP3	3	Dias_NMP (Cluster 1 E8.0 ), Guillot Mouse NMP late, Diaz-Cuadros_mouse (E9.5)																																				ACTG1					HOXC4
AGO1	3	Guillot Mouse NMP late, Gouti NMP (module 2 E9.5 ), Diaz-Cuadros_mouse (E9.5)																																				ACTB					HOXC10
ACOT7	3	Guillot_Chicken NMPearly, Guillot Mouse NMP late, Diaz-Cuadros_mouse (E9.5)																																									HOXA5
ZIC5	2	Dias_NMP (Cluster 1 E8.0 ), Diaz-Cuadros_mouse (E9.5)																																									HOXA10
YWHAZ	2	Guillot_Chicken NMPlate, Guillot Mouse NMP late																																									GREB1
YWHAG	2	Guillot_Chicken NMPlate, Guillot Mouse NMP late																																									FOXD1
YWHAB	2	Guillot_Chicken NMPlate, Guillot Mouse NMP late																																									FOXB1
YBX3	2	Guillot_Chicken NMPlate, Guillot Mouse NMP late																																									FGF17
USP19	2	Guillot_Chicken NMPearly, Guillot Mouse NMP late																																									FABP5
UPP1	2	Guillot Mouse NMP early, Gouti NMP (module 1 E8.5 )																																									ENC1
UBE2S	2	Guillot Mouse NMP early, Guillot_Chicken NMPlate																																									DUSP6
TUBB2B	2	Guillot Mouse NMP late, Diaz-Cuadros_mouse (E9.5)																																									CYSTM1
TUBA1B	2	Guillot_Chicken NMPlate, Guillot Mouse NMP late																																									CYP26A1
TSPAN13	2	Guillot_Chicken NMPearly, Guillot Mouse NMP early																																									COL2A1
TRIL	2	Guillot Mouse NMP late, Gouti NMP (module 2 E9.5 )																																									CIB1
TRH	2	Guillot Mouse NMP early, Dias_NMP (Cluster 1 E8.0 )																																									CHD3
TPM4	2	Guillot_Chicken NMPlate, Guillot Mouse NMP late																																									CELSR1
TPI1	2	Guillot Mouse NMP late, Diaz-Cuadros_mouse (E9.5)																																									CCNJL
TOMM20	2	Guillot_Chicken NMPearly, Guillot Mouse NMP early																																									CCND1
TMEM123	2	Guillot_Chicken NMPlate, Guillot Mouse NMP late																																									BNIP3
TDH	2	Guillot Mouse NMP early, Dias_NMP (Cluster 1 E8.0 )																																									ARID3B
TCF12	2	Guillot_Chicken NMPlate, Guillot Mouse NMP late																																									AGO1
TALDO1	2	Guillot Mouse NMP early, Guillot_Chicken NMPlate																																									ACOT7
SYT11	2	Guillot Mouse NMP late, Diaz-Cuadros_mouse (E9.5)																																									2010111I01RIK
SSBP2	2	Guillot Mouse NMP late, Diaz-Cuadros_mouse (E9.5)
SRSF7	2	Guillot Mouse NMP early, Guillot_Chicken NMPlate
SPATS2	2	Guillot_Chicken NMPlate, Guillot Mouse NMP late
SPARCL1	2	Guillot Mouse NMP late, Gouti NMP (module 2 E9.5 )
SP5	2	Guillot_Chicken NMPearly, Guillot Mouse NMP early
SOX2	2	Guillot Mouse NMP late, Diaz-Cuadros_mouse (E9.5)
SOD1	2	Guillot_Chicken NMPlate, Guillot Mouse NMP late
SNRPN	2	Guillot Mouse NMP early, Guillot_Chicken NMPlate
SMTNL2	2	Guillot Mouse NMP late, Diaz-Cuadros_mouse (E9.5)
SLC7A3	2	Guillot Mouse NMP early, Dias_NMP (Cluster 1 E8.0 )
SFRP2	2	Guillot Mouse NMP late, Diaz-Cuadros_mouse (E9.5)
SFPQ	2	Guillot_Chicken NMPlate, Guillot Mouse NMP late
SEMA3A	2	Guillot_Chicken NMPearly, Guillot Mouse NMP late
SCN2B	2	Dias_NMP (Cluster 1 E8.0 ), Gouti NMP (module 1 E8.5 )
SCD2	2	Guillot Mouse NMP late, Diaz-Cuadros_mouse (E9.5)
SALL1	2	Guillot_Chicken NMPlate, Guillot Mouse NMP late
RXRG	2	Guillot Mouse NMP early, Gouti NMP (module 1 E8.5 )
RPL8	2	Guillot Mouse NMP early, Guillot_Chicken NMPlate
RPL35	2	Guillot Mouse NMP early, Guillot_Chicken NMPlate
RPL29	2	Guillot Mouse NMP early, Guillot_Chicken NMPlate
RPL27	2	Guillot Mouse NMP early, Guillot_Chicken NMPlate
RPL11	2	Guillot Mouse NMP early, Guillot_Chicken NMPlate
RASGRP2	2	Guillot Mouse NMP early, Dias_NMP (Cluster 1 E8.0 )
RAN	2	Guillot_Chicken NMPearly, Guillot Mouse NMP early
PYM1	2	Guillot Mouse NMP early, Guillot_Chicken NMPlate
PTPRZ1	2	Gouti NMP (module 1 E8.5 ), Guillot_Chicken NMPlate
PTK7	2	Guillot Mouse NMP late, Diaz-Cuadros_mouse (E9.5)
PSMC5	2	Guillot Mouse NMP early, Guillot_Chicken NMPlate
PRTG	2	Guillot_Chicken NMPearly, Gouti NMP (module 1 E8.5 )
POU5F1	2	Guillot Mouse NMP early, Gouti NMP (module 1 E8.5 )
PMAIP1	2	Dias_NMP (Cluster 1 E8.0 ), Diaz-Cuadros_mouse (E9.5)
PITRM1	2	Guillot Mouse NMP late, Diaz-Cuadros_mouse (E9.5)
PIM2	2	Guillot Mouse NMP early, Dias_NMP (Cluster 1 E8.0 )
PHLDA2	2	Guillot Mouse NMP early, Guillot_Chicken NMPlate
PHF10	2	Guillot_Chicken NMPearly, Guillot Mouse NMP late
PGM2	2	Guillot_Chicken NMPearly, Dias_NMP (Cluster 1 E8.0 )
PGK1	2	Guillot Mouse NMP late, Diaz-Cuadros_mouse (E9.5)
PDGFA	2	Guillot_Chicken NMPearly, Dias_NMP (Cluster 1 E8.0 )
PABPC1	2	Guillot Mouse NMP late, Diaz-Cuadros_mouse (E9.5)
NREP	2	Guillot_Chicken NMPlate, Guillot Mouse NMP late
NR6A1	2	Guillot Mouse NMP early, Gouti NMP (module 1 E8.5 )
NIN	2	Guillot Mouse NMP late, Diaz-Cuadros_mouse (E9.5)
NECTIN2	2	Guillot Mouse NMP early, Dias_NMP (Cluster 1 E8.0 )
NDUFS4	2	Guillot Mouse NMP early, Guillot_Chicken NMPlate
NCAM1	2	Guillot Mouse NMP late, Diaz-Cuadros_mouse (E9.5)
MYCL	2	Guillot_Chicken NMPearly, Diaz-Cuadros_mouse (E9.5)
MRPL12	2	Guillot Mouse NMP early, Guillot_Chicken NMPlate
MLLT3	2	Guillot Mouse NMP late, Diaz-Cuadros_mouse (E9.5)
MKRN1	2	Guillot_Chicken NMPlate, Diaz-Cuadros_mouse (E9.5)
MDK	2	Guillot_Chicken NMPearly, Guillot Mouse NMP late
MCRIP2	2	Guillot_Chicken NMPearly, Dias_NMP (Cluster 1 E8.0 )
MAP1B	2	Guillot Mouse NMP late, Diaz-Cuadros_mouse (E9.5)
LRP2	2	Gouti NMP (module 2 E9.5 ), Diaz-Cuadros_mouse (E9.5)
LIN28A	2	Guillot_Chicken NMPearly, Diaz-Cuadros_mouse (E9.5)
LIMCH1	2	Guillot Mouse NMP late, Gouti NMP (module 2 E9.5 )
LDHA	2	Guillot Mouse NMP late, Diaz-Cuadros_mouse (E9.5)
KRT18	2	Guillot_Chicken NMPearly, Guillot Mouse NMP early
KIF26B	2	Guillot Mouse NMP late, Gouti NMP (module 2 E9.5 )
KDM7A	2	Guillot Mouse NMP late, Diaz-Cuadros_mouse (E9.5)
JARID2	2	Guillot_Chicken NMPlate, Diaz-Cuadros_mouse (E9.5)
IFNGR2	2	Guillot Mouse NMP late, Diaz-Cuadros_mouse (E9.5)
IFIH1	2	Dias_NMP (Cluster 1 E8.0 ), Gouti NMP (module 1 E8.5 )
HSP90AA1	2	Guillot_Chicken NMPearly, Guillot Mouse NMP early
HOXD9	2	Guillot Mouse NMP late, Gouti NMP (module 2 E9.5 )
HOXD8	2	Guillot_Chicken NMPlate, Gouti NMP (module 2 E9.5 )
HOXD4	2	Guillot_Chicken NMPlate, Guillot Mouse NMP late
HOXC8	2	Guillot_Chicken NMPlate, Guillot Mouse NMP late
HOXC4	2	Guillot Mouse NMP late, Diaz-Cuadros_mouse (E9.5)
HOXB9	2	Guillot_Chicken NMPlate, Guillot Mouse NMP late
HOXB5OS	2	Guillot Mouse NMP late, Gouti NMP (module 2 E9.5 )
HOXA7	2	Guillot Mouse NMP late, Gouti NMP (module 2 E9.5 )
HNRNPAB	2	Guillot_Chicken NMPlate, Guillot Mouse NMP late
HNRNPA2B1	2	Guillot_Chicken NMPlate, Guillot Mouse NMP late
HMGB2	2	Guillot Mouse NMP early, Guillot_Chicken NMPlate
HMGB1	2	Guillot Mouse NMP early, Guillot_Chicken NMPlate
HES3	2	Dias_NMP (Cluster 1 E8.0 ), Diaz-Cuadros_mouse (E9.5)
HDAC1	2	Guillot_Chicken NMPearly, Guillot Mouse NMP early
H3F3B	2	Guillot Mouse NMP early, Guillot_Chicken NMPlate
H2AFZ	2	Guillot Mouse NMP early, Guillot_Chicken NMPlate
GTF2E2	2	Guillot Mouse NMP early, Guillot_Chicken NMPlate
GRSF1	2	Guillot Mouse NMP early, Gouti NMP (module 1 E8.5 )
GNB1	2	Gouti NMP (module 1 E8.5 ), Guillot Mouse NMP late
GLO1	2	Guillot Mouse NMP early, Guillot_Chicken NMPlate
GJC1	2	Guillot_Chicken NMPlate, Guillot Mouse NMP late
GCSH	2	Guillot_Chicken NMPearly, Guillot Mouse NMP early
GBX2	2	Guillot_Chicken NMPearly, Diaz-Cuadros_mouse (E9.5)
FST	2	Guillot Mouse NMP early, Gouti NMP (module 1 E8.5 )
FRZB	2	Guillot Mouse NMP early, Gouti NMP (module 1 E8.5 )
FOXB1	2	Guillot Mouse NMP late, Diaz-Cuadros_mouse (E9.5)
FN1	2	Guillot_Chicken NMPearly, Guillot Mouse NMP late
FGFBP3	2	Guillot Mouse NMP early, Dias_NMP (Cluster 1 E8.0 )
FABP7	2	Guillot Mouse NMP early, Gouti NMP (module 1 E8.5 )
FABP5	2	Guillot Mouse NMP late, Diaz-Cuadros_mouse (E9.5)
EXOSC7	2	Guillot_Chicken NMPearly, Guillot Mouse NMP early
ETS2	2	Guillot Mouse NMP late, Gouti NMP (module 2 E9.5 )
ENO1	2	Guillot_Chicken NMPlate, Diaz-Cuadros_mouse (E9.5)
ENC1	2	Guillot Mouse NMP late, Diaz-Cuadros_mouse (E9.5)
EIF3E	2	Guillot Mouse NMP early, Guillot_Chicken NMPlate
EEF1D	2	Guillot Mouse NMP early, Guillot_Chicken NMPlate
EEF1A1	2	Guillot_Chicken NMPlate, Guillot Mouse NMP late
DYNLL2	2	Guillot_Chicken NMPlate, Guillot Mouse NMP late
DUT	2	Guillot Mouse NMP early, Guillot_Chicken NMPlate
DUSP6	2	Guillot Mouse NMP late, Diaz-Cuadros_mouse (E9.5)
DTX3L	2	Guillot_Chicken NMPearly, Dias_NMP (Cluster 1 E8.0 )
DAZAP2	2	Guillot_Chicken NMPlate, Guillot Mouse NMP late
CYSTM1	2	Guillot Mouse NMP late, Diaz-Cuadros_mouse (E9.5)
CTSZ	2	Guillot_Chicken NMPearly, Guillot Mouse NMP early
CTNNB1	2	Guillot_Chicken NMPlate, Guillot Mouse NMP late
COL2A1	2	Guillot Mouse NMP late, Diaz-Cuadros_mouse (E9.5)
CIB1	2	Guillot Mouse NMP late, Diaz-Cuadros_mouse (E9.5)
CHD3	2	Guillot Mouse NMP late, Diaz-Cuadros_mouse (E9.5)
CHCHD10	2	Guillot Mouse NMP early, Dias_NMP (Cluster 1 E8.0 )
CGNL1	2	Guillot_Chicken NMPearly, Gouti NMP (module 2 E9.5 )
CENPX	2	Guillot Mouse NMP early, Guillot_Chicken NMPlate
CELSR1	2	Guillot Mouse NMP late, Diaz-Cuadros_mouse (E9.5)
CDX2	2	Guillot Mouse NMP early, Diaz-Cuadros_mouse (E9.5)
CDH2	2	Guillot_Chicken NMPearly, Guillot Mouse NMP late
CCNJL	2	Guillot Mouse NMP late, Diaz-Cuadros_mouse (E9.5)
CCND1	2	Guillot Mouse NMP late, Diaz-Cuadros_mouse (E9.5)
CBX3	2	Guillot_Chicken NMPlate, Guillot Mouse NMP late
CAR4	2	Guillot Mouse NMP early, Dias_NMP (Cluster 1 E8.0 )
CAND1	2	Guillot_Chicken NMPlate, Guillot Mouse NMP late
BTF3	2	Guillot Mouse NMP early, Guillot_Chicken NMPlate
BST2	2	Guillot Mouse NMP early, Dias_NMP (Cluster 1 E8.0 )
BEX4	2	Guillot Mouse NMP early, Diaz-Cuadros_mouse (E9.5)
BEX1	2	Guillot Mouse NMP early, Diaz-Cuadros_mouse (E9.5)
BCAT1	2	Guillot_Chicken NMPearly, Guillot Mouse NMP early
B3GNT7	2	Dias_NMP (Cluster 1 E8.0 ), Guillot_Chicken NMPlate
ATP5C1	2	Guillot_Chicken NMPearly, Guillot Mouse NMP early
ARPP19	2	Guillot Mouse NMP early, Guillot_Chicken NMPlate
ARID3B	2	Guillot Mouse NMP late, Diaz-Cuadros_mouse (E9.5)
APOE	2	Guillot Mouse NMP early, Dias_NMP (Cluster 1 E8.0 )
APELA	2	Guillot Mouse NMP early, Dias_NMP (Cluster 1 E8.0 )
ACTG1	2	Guillot_Chicken NMPlate, Guillot Mouse NMP late
ACTB	2	Guillot_Chicken NMPlate, Guillot Mouse NMP late
ABCG1	2	Guillot_Chicken NMPearly, Dias_NMP (Cluster 1 E8.0 )
2010111I01RIK	2	Guillot Mouse NMP late, Diaz-Cuadros_mouse (E9.5)

## Sheet: Table NMP NSB CNH
This study		Wymeersch et al, 2019		This study		Wymeersch et al, 2019
Guillot_Chicken	Guillot_Mouse	E8.5 NSB		Guillot_Chicken	Guillot_Mouse	E10.5 CNH
NMPearly	NMP early	DEGs up	DEGs down	NMPlate	NMP late	DEGs up	DEGs down
CLDN1	POU5F1	MAPK13	HBA-A1	RASGRP3	HOXB5OS	RFTN2	LOC100045484
Wpkci-7	CDX1	LOC100047899	ADH6B	HOXD12	HOXC9	ADH6B	DHRS7
PLPP1	LDHB	DHRS7	TXNIP	CD99	GREB1	TXNIP	RBCK1
PRTG	FST	PLEKHA2	4732462B05RIK	HOXA9	HOXA9	HES6	PLEKHA2
DRAXIN	PTMA	RGMA	ANTXR2	HOXA11	HOXC6	FRMD4A	LOC623453
NKAIN4	GRSF1	AIM1L	FRMD4A	SCD	HMGA2	RHOB	APOE
SP5	APOE	DYNLRB2	RHOB	HOXC9	GNAS	ZFP46	TSHZ1
WNT8A	HPRT	APOE	ZFP46	HOXC10	PTMS	DPP8	IMPDH1
VRTN	ID3	NKX1-2	DCHS1	GREB1	H2AFY	IER3	POU5F1
NT5DC2	ATP5B	POU5F1	HOXD9	WNT5A	NCAM1	TAX1BP3	TES
EPCAM	EPCAM	TES	IER3	ACTG1	HBB-Y	LAMP2	GLDC
EPHA1	RBP1	GLDC	HOXC6	S100A6	MLLT3	2610024H22RIK	RPL31
TMSB15B	PFN1	EMB	LAMP2	HOXB5	TUBA1B	STAU2	DSG2
CDH2	GPX4	RBBP7	2610024H22RIK	ARL1	UCHL1	HOXA5	KRT8
MT4L	NME1	WNT8A	LAPTM5	NREP	TUBA1A	LYPD6	GMFG
FN1	PHLDA3	LIN28	HOXA5	STMN1	HOXC8	IGFBP3	RRP9
CACNG3	WFDC2	RNASE1	BMP1	CCNI	PITRM1	HOXD4	LLGL2
CTSZ	HOXA1	EPB4.1L4A	PALLD	SNX10	SLC2A3	NOTCH4	2810405J04RIK
CXCL14	SLC25A5	RPL31	GYPC	ENHO	LIX1	MKIAA0282	E430003D02RIK
MPZL3	CXX1B	DSG2	LYPD6	HOXA4	DAZAP2	C920004C08RIK	GART
MESP1	CITED2	KRT8	LOC381140	PSMD1	SSBP2	2610528A11RIK	SRM
HSP90AA1	EIF4A1	GMFG	IGFBP3	PDE6D	RPS23	HP1BP3	SLC39A4
AMY1A	RANBP1	DEDD2	IGSF3	FSTL1	RPS28	GNAS	GMFG
CFC1	BEX1	LLGL2	HOXD4	METTL6	SCD2	SREBF2	FST
CNTN2	SRSF3	FKBP11	2310033F14RIK	ATF4	EEF1B2	SPSB1	PRAMEL4
MCAT	HNRNPA1	E430003D02RIK	NOTCH4	FGF18	ID2	CKB	PDLIM1
DLL1	DNMT3B	NAPRT1	MKIAA0282	HOXD4	HOXA7	SAMD9L	SPINT1
PMVK	ACER2	LHX1	TMEM118	HOXD11	GRB10	1110003E01RIK	SLC9A3R1
PLAC8L1	MRPL42	CNNM2	C920004C08RIK	EEF1A1	HOXB9	LOC100046775	HOXB5
BMP2	SP5	9430073N08RIK	2610528A11RIK	TUBAL3	IGF1R	MFSD2	HSPBAP1
LIN28A	NUDC	DUT	VWA2	ASB13	RPS27RT	HBB-BH1	GPD2
KRAS	CXX1A	CRABP1	ZFP579	DIXDC1	SMTNL2	ANTXR1	TSPAN12
MDK	DNAJA1	GMFG	CDH3	BRI3	TUBB2B	NUAK1	9330147J08RIK
PPAT	SSSCA1	PMP22	RAB8B	chPKCI	FN1	SLC4A1	POU5F1
GJA1	H2AFZ	FOXA3	HP1BP3	ARHGEF9	CYP26A1	GCNT2	STMN2
UCH-L1	HMGN1	FST	SREBF2	HDGF	FABP5	LIMA1	A630034I12RIK
NUCB2	SNRPN	RERG	PRICKLE1	HAPLN1	WNT5A	C230043G09RIK	WDR46
CD24	TSPAN13	PRAMEL4	SPSB1	JARID2	SOD1	NKD2	WDR43
CACUL1	RPL8	SFRP1	CKB	OAF	HOXC10	CD59A	1110012J17RIK
MYLK	ATP5L	1700021C14RIK	SAMD9L	MID1IP1	FGF17	HSD17B7	SULT4A1
AKR1D1	H3F3B	RXRG	UCHL1	H3F3C	ACTB	ANTXR1	L1TD1
LZTS1	ZFP428	POU3F1	IAP	RPS15A	SULF2	SH3PXD2B	MDN1
HTRA1	PSMA4	AW548124	FDPS	NUP205	PABPC1	HADHB	PDGFA
DHODH	ATP5C1	3110009E18RIK	MFSD2	HOXD8	BNIP3L	B430110C06RIK	PHLDA2
ACOT7	NDUFS4	GDF1	HBB-BH1	TXN	HBA-X	ADAM23	ZMYND11
RAB3A	BCAS2	WFDC2	TRPS1	HMGN4	PALLD	PGM2	GABRB3
TOMM20	CHCHD10	SPINT1	ANTXR1	SOD1	DUSP6	TCF15	WFIKKN1
NFASC	NPM1	TRH	5430417L22RIK	CKAP2	SERF1	OXCT1	VKORC1
MCRIP2	RAN	RBP1	NUAK1	FANCC	ARID3B	CRELD1	VKORC1
AP1S3	PRDX6	SLC9A3R1	SLC4A1	FAU	PGK1	LOC100045981	LOC224532
SP4	SUMO1	CAMK2N2	ARPC1B	TPST1	CDH2	FERMT1	LOC383897
GXYLT2	NECTIN2	PRRG3	GCNT2	TMEM123	NNAT	A830059I20RIK	LOC386405
MT3	HMGB2	ZFP259	BCOR	TESC	MEST	GAD1	0610030P10RIK
LSS	EMB	SCAMP5	PRICKLE1	C9orf3	CHD3	EG244911	RBPMS
GCHFR	RPS3A1	GPR23	C230043G09RIK	HDGFL3	IGF2	CELSR1	9530058B02RIK
AIG1	SET	HSPBAP1	NKD2	LGALS8	MAGED1	CCNJL	GNA14
2021-09-09	CAR4	ROBO1	CD59A	GULP1	CCNJL	OGFRL1	PLCG2
ITPK1	LSM2	CRMP1	PDK1	HOXA5	NEDD4	OXCT1	CELSR3
AGRP	EIF1AX	LOC226017	HSD17B7	RPL27	RPS25	IGFBP2	PODXL
GJB1	TCEAL8	PPAT	ANTXR1	CD3E	MT-ND3	ETFA	GRSF1
MFGE8	RBBP7	CLDN11	IL11RA1	ATP5ME	GM10053	LOC100046343	PMM1
ARL8BL	NEFM	GPD2	SH3PXD2B	ARID1B	ATP5G3	2310040A07RIK	FAH
DHDDS	SUB1	SNURF	HADHB	HOXC8	CKS1BRT	AARD	DPP4
CKS1B	2700060E02RIK	SOAT1	B430110C06RIK	HNRNPH2	YWHAZ	PARD6G	COL4A1
SELENOS	ATP5G1	GBX2	TWIST2	FAM168B	ARID1A	SULF2	CDH1
TSPAN13	UBE2N	NCRNA00117	ADAM23	IGF1R	RPL27A	HBA-X	DNAHC11
B2M	FTL1	DNMT3B	ODZ4	RPL26L1	NISCH	MFAP2	NT5E
NOL11	NKX1-2	POU5F1	PGM2	ANXA2	GM3839	SAMD14	LAMA5
TSPAN16	BEX3	STMN2	TCF15	PMP22	SSBP3	ANXA3	PVRL2
EIF2AK3	ATP5F1	KLF5	OXCT1	RPL37A	IL17RD	D630014A15RIK	IQGAP1
CTSA	PPP4C	TRNT1	SSBP4	VIM	VCAN	CEP55	CAR4
LARP7	SUMO2	TJP2	CRELD1	RPL29	PPP1CB	T	WDR46
SPIN1W	NEFL	SLC7A3	OLFML3	AP5M1	MAP1B	TMEM50B	AKP2
DPYSL3	NR6A1	SLC2A1	FERMT1	SRGAP1	HOXC4	LOC100045413	ANKMY2
GNA11	ATP5O	SULT4A1	ANGPT2	SEM1	RPL12	PMAIP1	PKP2
XPR1	RPLP0	L1TD1	A830059I20RIK	GARS	CDKN1C	FBLN2	TMEM82
SENP5	DUT	PCDH1	VPS37D	GLO1	IDI1	EPB4.9	CLIC6
SGK3	MRPL28	MDN1	GAD1	ABHD18	WDR89	SHISA2	GPX2
Meis2a.2	NDUFA12	SOAT1	EG244911	SALL1	RPL30	GM22	POLR1D
IL6R	ATP5G2	PHLDA2	CCNJL	SARNP	IFITM1	SMOX	AW555464
RGN	GADD45GIP1	AW125296	PDGFRA	KLHL24	HNRNPA0	LIX1	GAS6
HOXB8	HSP90AA1	LOC100047963	OGFRL1	HNRNPUL1	KPNB1	ABAT	NOL1
LACTB	SPC24	RSPH1	OXCT1	RPL35	NDN	ST6GALNAC4	CCND2
DUSP14	EIF3M	TTR	IGFBP2	DTNBP1	TPI1	DUSP6	CCND2
SMARCA4	RASGRP2	SCN2B	NCAM1	H2AFZ	PLAGL1	IL17RD	RANGRF
RMDN3	BEX4	GABRB3	AARD	ABRAXAS2	GNB1	SEMA3F	SPINK3
CHRD	MTCH2	CITED2	PARD6G	ENO1	RPS20	2310011G17RIK	KRT18
EXOSC7	SRSF7	WNT8A	SULF2	HOXC12	FASN	BHLHB2	FHL1
CCDC88C	RANGRF	WNT8A	C030027H14RIK	C12orf66	CHD4	RAP2C	F11R
TRARG1	PRMT1	RIMS3	CREG1	LIFR	HNRNPH1	4632427N05RIK	CCNE1
CYP1B1	HDAC1	WFIKKN1	PELI3	GPX8	CD63	IGF1R	RBM47
DACT1	EEF1D	1500011B03RIK	LOC212390	LYPD6B	HOXA10	TOB1	POLR1B
PDZRN3	ECHS1	TRIM71	HBA-X	RPL11	SFRP2	B930041F14RIK	CIRH1A
IRF6	POLR1D	4933412E12RIK	MFAP2	MRPS17	FUS	SLC19A2	CDX1
PGM2	CCT5	VKORC1	SAMD14	CRTAC1	CTNNB1	FAT1	RRP12
MYCL	PSMD6	LOC383576	ANXA3	ILKAP	ANP32E	SPOCK2	COL18A1
URB1	EIF3F	LOC383897	E030026I10RIK	REEP5	RPS24	VSTM2B	RPS4Y2
MRPS35	TRH	LOC386405	LOR	POU2F1	UBC	KLC4	NR6A1
ST14	PSMA7	0610030P10RIK	PARVA	PGAM1	SOX11	IRF2	PRSS8
EIF2S2	PPIH	C130020C07RIK	D630014A15RIK	COTL1	GM26909	TULP4	NME3
SPARC	MRPL18	RBPMS	H2AFY	ZEB1	UNC13D	LOC100041567	SNURF
DTX3L	NHP2	TMEM51	2810410A03RIK	IGFBP2	CS	NUDT4	PRTG
ANKMY2	BTF3	4631416L12RIK	FBXL17	UBE2E2	TXN1	MLLT3	CHCHD10
RASGRP1	RPL6	RHEBL1	T	ATF6	CNOT6	ACAT2	CAD
ABCC6	PSMB6	LRRC48	EFNA1	RIPK2	SALL1	9530068E07RIK	PDZK1
ZNF518A	TPM3	RPL38	TMEM50B	PCBD1	IGF2BP3	GHR	MRG1
EDNRB	EMG1	GRASP	HAP1	RPL8	HNRNPAB	AACS	KCNK1
PAICS	RPS3	PCDH1	LOC100045413	SRSF7	AKT1	LOC100046343	SOX17
VASH1	EIF3G	GNA14	FBLN2	ID3	PBRM1	KLF9	TOMM34
FBXO5	MEG3	APOC1	EPB4.9	RBM24	HOXD11	HAS2	HEATR1
ABCE1	BCAT1	DAB1	DDX49	PSMD7	SERPINH1	PDIA5	SRM
COL1A2	RPL7A	PLCG2	COL2A1	AP2M1	IPO5	LOC100044221	NT5E
BF1	COPS6	5033414K04RIK	SHISA2	ACAP2	MAPK1IP1L	MELA	GRWD1
DAZAP1	TAF7	HOXA1	GM22	CTNNB1	AGO2	ZFP521	FRAT2
CDX1	STOML2	CELSR3	SERPINE2	TIMP3	BNIP3	2900060P06RIK	SLC13A4
AGRN	PSMA6	SFRP1	SMOX	CORO1B	YBX3	BCL11A	PWP2
CTSD	SELENOH	KBTBD8	ABAT	ALDH7A1	MCM7	HOXD1	MFSD10
GFPT2	PIM2	GRSF1	SMARCD3	BID	MSL1	ADAMTS9	FBLIM1
GART	RPL9	FAH	DUSP6	ATP5MF	TTC3	RRM1	MEIS2
IVNS1ABP	BRIX1	DPP4	IL17RD	HOXA10	CSDE1	EMCN	ZSCAN10
CASR	GM10076	RBPMS2	SEMA3F	HEXB	PRELID2	H1F0	MND1
SLC7A5	TALDO1	CSNK	TBX6	MATR3	ACOT7	FAT1	KRTCAP3
WBP4	IMPDH2	PNMA2	BHLHB2	TALDO1	SLC25A4	PEA15A	CDX1
ORAI2	CCT4	AKAP12	4632427N05RIK	IFRD1	BANF1	LOC280487	CEP120
KRT7	RPL19	CDH1	IGF1R	COL4A1	PHF10	C230098O21RIK	1810015A11RIK
TIMM21	PSMB2	TCEAL5	TOB1	RAB5C	NSD1	DYSF	TNFRSF21
FYCO1	BCCIP	DNAHC11	B930041F14RIK	GNAI3	EIF4G2	LOC676640	PDZK1
Pou5f3	ATP5E	3100002J23RIK	GJB6	ING3	PRPF8	PALLD	PKP2
ELMOD1	RPS8	NT5E	SLC19A2	COX7C	NAAA	TRIB2	VARS
CASP7	ELOF1	PRODH	PTK7	RAB11B	UBA1	GREB1	COL18A1
MTF1	HMGB1	DDX21	ST5	RRM1	SREBF2	D15MIT260	CXX1C
TMPRSS9	RPLP1	DHX32	FAT1	WSB1	PDK1	A730054J21RIK	ADSSL1
GDPD5	RBM42	THY1	YPEL5	FBLN1	2010107E04RIK	C130092E12	MTHFD1
YRDC	MALAT1	PVRL2	SPOCK2	MAPRE2	ACTN1	A830080H07RIK	L1TD1
ABCA2	ANP32A	1700019D03RIK	VSTM2B	AZIN1	HOXA5	E330009J07RIK	ZFHX2
NRXN1	PSMB3	RPS6KL1	KLC4	MSX1	OLFR354	SCL0004190.1_3	XLR4A
GBX2	EEF1AKMT1	IQGAP1	IRF2	RAMAC	RPS21	TRPS1	TCFL5
XPO4	LSM3	CAR4	TULP4	DUT	PTPRF	B230343A10RIK	PMM1
DNAJC17	ATOX1	NKX1-2	NUDT4	TOMM6	TRP53I11	WNT5A	PLP2
C25H1ORF43	PSMC5	FOXH1	MLLT3	BAZ1B	SYT11	5830411I20	VKORC1
PTPRO	EIF2S1	EG433229	2310014H01RIK	MKRN1	HNRNPD	MLLT3	BC003885
C12orf10	PSMB7	AKP2	ACAT2	UBE2Q2	CYSTM1	WHRN	KCNK1
NCAPH	CALM2	BCAS1	CPN1	CTGF	YWHAB	FLNB	BEX4
CDH1	SPINT2	ANKMY2	9530068E07RIK	DCTN3	NOC2L	FLNB	2510009E07RIK
STK26	PPP1CA	TMEM82	GHR	PCNP	DDX3X	VEGFC	ATIC
RBBP8	RPL36	DNAJB13	AACS	GNG5	DHX9	6330407I18RIK	RPL31
SOX17	RXRG	CLIC6	LOC100046343	AK1	GTF2I	ZEB1	TES
DNAJC11	ECI1	HSP90AA1	SLIT2	CPNE2	KDM7A	TUBA1A	DAB2
RDH10	FTH1	LRP11	IGFBP5	BTF3	P4HB	CD40	GFRA3
SUCLG2	PHLDA2	GPX2	ACPL2	RPL23A	AGO1	GCAP26	ANXA11
ALDH5A1	TGIF1	AMN	HAS2	TPRG1L	CCND3	POGK	PIK3R1
KANK1	LYAR	SLC11A1	PDIA5	GNPDA2	RAD21	TRIM2	FHL1
NBN	RPL18A	MNS1	LOC100044221	RASL11B	CSRP2	WNT5A	PKNOX2
CD2AP	YWHAQ	NOLA2	MELA	JMJD4	PTBP1	TPM1	EEF1D
HIF1A	TIMM13	POLR1D	FNBP1	SVBP	HOXD4	9930105H17RIK	WARS
COX18	RPS4X	CNTNAP2	ZFP521	CTHRC1	CBX3	CHD3	BID
ETV1	OARD1	DOCK11	2900060P06RIK	RALGPS2	MCM6	LOC100045869
DIRC2	APLN	MESP1	H19	SUGP1	MDK	GNG12
NRG4	FGFBP3	JAKMIP1	SMOX	TRA2A	GDF11	HOPX
DUSP19	UPP1	OTX2	BLVRA	CALML4	CBX5	GAD1
BEND6	TXNL4A	MYL3	PEA15A	METTL9	HES1	EG630499
NMRAL1	ECHDC2	NCL	C230098O21RIK	FANCL	USP22	6330403K07RIK
EIF4EBP3	CNPY2	NME5	DYSF	EIF3H	HMGCS1	ETS2
GALNT6	DEK	DYRK3	LOC676640	PSMD2	KHSRP	A630082K20RIK
SLC29A4	FKBP3	CCND2	TNFRSF12A	C13H5orf15	SLC38A2	SYDE1
COL1A1	BAX	CCND2	TRIB2	NAXD	YWHAG	LYPD6B
SCGN	RPS19BP1	HES3	GREB1	DUSP23	6330403K07RIK	SMOX
TRIM35	HOTAIRM1	NANOG	ITPKB	CLPTM1	ZMIZ1	GJC2
GSG1L	CBR1	SPINK3	2700084L06RIK	TCF12	TNFAIP1	3110079O15RIK
SLC35A5	ATP5H	CRIP2	KRT36	AIFM1	RPL38	FMNL3
EBF4	EXOSC3	KRT18	A730054J21RIK	ZNF423	SLC39A6	MAGED2
PYCR3	RPL11	FHL1	A730017D01RIK	CHST15	RCOR2	GMPR
HIST2H3L	NDUFA10	F11R	C130092E12	BRSK2	WDR6	LAMP2
ESCO1	RBPMS2	2810046M22RIK	VIM	MRPS16	44441	SEMA5B
ST3GAL1	PFDN5	CCNE1	MRAS	LRRC20	CSE1L	PDIA5
MGAT1	GRPEL1	RAPGEF5	WBP1	ATP5A1Z	ZFP422	FADS1
NIPBLL	DCUN1D5	SMTNL2	A830080H07RIK	XPO1	RNPS1	HES6
CNTNAP1	RPL35	NCL	E330009J07RIK	SULT1B1	PRELID1	BCL11B
EGFL7	NDUFS8	CDX1	TRPS1	TTC7B	TUBB5	DUSP26
HARS	ANXA7	RRP12	UAP1L1	PTP4A1	ETS2	DCI
CNR1	ETFA	ROR2	B230343A10RIK	PSMB4	MYH10	1200009O22RIK
DNMT3A	EXOSC5	COL9A3	WNT5A	SAT1	44450	SLC2A6
PHF10	RPL24	LOC100045403	LRCH1	ITGAV	DYNLL2	ERAF
PISD	COA3	C030003D03RIK	5830411I20	GPR107	EGLN1	IL11RA1
CASD1	RPL3	1700027A23RIK	MLLT3	FUBP1	FOXD1	HOXA11S
BCAT1	FKBP11	NR6A1	WHRN	WNT3A	WDR26	SDC2
MAP1LC3A	CRIP2	METRN	SPECC1	FGF13	TNKS2	NPTX2
GLTP	NOP10	PRSS8	VEGFC	CDK2AP1	H19	SMUG1
CORO1C	REXO2	SNURF	6330407I18RIK	ZNF207	FLNA	HOXC12
LDLRAP1	TOMM20	DKK4	ZEB1	COMTD1	DDX17	GAD1
ALDH1A2	LRPAP1	FOXD4	BMF	H2AFV	CCND1	CIB1
RRAGB	SRA1	NME3	CD40	BIRC2	ZC3H7B	ARFL4
LTA4H	MRTO4	CALCA	GCAP26	TIMMDC1	TMEM132C	NDN
LMO1	GMPS	RCC1	POGK	SLC35C1	EIF4B	PEA15
TNNC1	RBM8A	SOX17	WNT5A	ANP32B	MAGED2	2310016C16RIK
DHCR24	LSM7	SNURF	WSB2	CRYAB	RPRM	GPX8
SEMA3A	MRPS14	PRTG	2610016A17RIK	NFIL3	ACTG1	SOCS2
APOA1	RPL29	CHCHD10	D430019H16RIK	CCDC93	PTGES3	HOXC13
PIK3CB	RPS9	ARHGAP29	TPM1	POMT1	PDCD5	LIMCH1
PPP6R2	PPID	2010001J22RIK	CHD3	WLS	CYP51	SERF1
DDX20	CLPP	CAD	FBXO10	RACK1	SRP54B	GNAS
NR2C1	RPL27	RHOX5	LOC100045869	TUBA1B	CSNK2A1	MFAP4
PLIN4	HSP90B1	CAPSL	ADAP1	YBX3	KIF26B	SLC1A3
SLC29A1	DKC1	APOM	GNG12	PYM1	HPGDS	SEMA3F
OPTN	ATPIF1	F2RL1	HOPX	THOC7	TOP2B	RNF208
TMEM192	SUPT4A	PPAN	E430033B07RIK	CBX3	TCF12	TCF4
SLC39A9	HSP90AB1	GRB7	GAD1	MBNL3	MPRIP	PLA2G12A
PANX2	GLRX3	PDZK1	GRINA	EWSR1	DPYSL2	CASP2
PARN	MRPL11	MRG1	RAB8B	CENPX	USP50	RASA3
MARCKSL1	TOMM22	PLAT	STAT3	ATP5MC3	MAP4K4	SERPINF1
CDH11	CDH1	GAL	6330403K07RIK	SKA2	ATXN7L3B	FGF17
SLC34A2	PSMC4	RAB25	ETS2	HP1BP3	ADPRH	CHST8
PMS2	MRPS34	IRX3	FN1	CABP1	RAC1	SALL1
PDHB	EEF1G	KCNK1	A630082K20RIK	BRD2	CLIC4	EFHA1
AKAP8L	PRDX2	MMP15	SYDE1	XRCC5	CLTC	ETFA
TAF7L	C1D	IRGM1	NRARP	UFM1	USP19	MAST2
ADH6	USE1	RAB38	LYPD6B	TSN	NOCT	GPX8
KRT18	APELA	NT5E	SMOX	DYNLL2	QK	CD63
RPUSD1	TDH	FRAT2	GJC2	SMAD6	EEF1A1	LOC100040592
CAMK2B	IDH3A	SLC13A4	IGF2	INTS7	CSNK1E	FSTL4
SLC4A8	EPOP	GPR23	FMNL3	PPIA	MT-CO2	KCNAB3
SHTN1	HYPK	FBLIM1	FMNL3	RASL11A	FOXB1	RELL1
ENPP2	TDP2	FGFBP3	IRF1	PSMD4	2610528A11RIK	NELF
PLA2G6	RPL36AL	ERAS	MAGED2	GPC1	MEX3A	RHBDF1
CALN1	SNRNP40	PRSS8	GMPR	KDELR3	TMEM123	TMEM98
COL14A1	EIF3K	MEIS2	SLC6A8	TIMM50	PURB	HOXD3
CD80	SYNGR2	CSN3	PDLIM4	XBP1	LLGL1	LIMA1
C1QTNF6	RPS27	MOGAT2	SEMA5B	TIA1	IMPAD1	PMAIP1
THSD1	ZNHIT1	ZSCAN10	PDIA5	YWHAG	SPATS2	2810022L02RIK
PAK3	MRPL34	MND1	FADS1	PPEF1	ITCH	SMYD2
SFRP5	SF3B5	KRTCAP3	HES6	TCP1	DHX15	SUSD4
PKD2	RPL13	CDX1	BCL11B	TNFRSF19	ATP2A2	TANC1
PTPN3	UQCR10	F2RL1	DUSP26	UBTF	GLI3	ARL8A
gga-mir-1608	EIF3E	GLDC	1200009O22RIK	MSX2	ZFP503	SLC39A6
SOD3	NDUFS7	1810015A11RIK	SLC2A6	C11orf52	CCDC50	CYP51
ABCG1	GLO1	MINA	ERAF	WDR34	TNRC6A	CYP26A1
AMPH	LSM4	OTTMUSG00000010673	HOXA11S	SUV39H2	CAPRIN1	DSCR6
NRCAM	DPH3	TNFRSF21	NPTX2	ANKRD10	HOXD9	LPL
TPD52L1	STARD3NL	RASGRP3	SMUG1	HDGFL2	PGD	NOTCH3
NTN3	ATP6V0E	CRYM	HOXC12	ACTB	SOX3	STAT3
ADGRG1	CTSZ	PDZK1	GAD1	MXD1	RPL23	LOC100046918
ETNK1	VAPA	PKP2	PEA15	CALD1	2010111I01RIK	HEBP1
DMAP1	MRPL21	LDHC	TMEM132C	HNRNPA2B1	SPIN1	PTPDC1
AGXT2	WNT8A	MYCBP	2310016C16RIK	PARK7	MARCKS	HOXD10
CUX2	SMDT1	NEFM	GPX8	YBX1	MTA1	6330419J24RIK
NANOS1	MRPL40	CLDN6	SOCS2	PREP	HBB-BH1	NES
OASL	EIF6	CXX1C	HOXC13	WARS	PLAGL2	TDRKH
ACACA	SLBP	CBX7	LIMCH1	TLE4	RNF220	FAM171A2
PDGFA	POLR2E	RBM35A	LRRN3	TDG	AK4	HSD17B11
CACNG5	PYM1	ARHGDIG	SOX5	AGA	MSMO1	FOXD1
POLG2	IGFBP2	ADSSL1	SERF1	NIPA1	HMGCR	RASL11B
C1GALT1C1	CARNMT1	UPP1	6330549D23RIK	HSBP1	CAND1	GPR83
CCNB2	EXOSC7	UPP1	MFAP4	GKAP1	FADS1	BCL11A
VTN	BEX2	UPP1	CDKN1A	HMGB3	SF3B3	TIMP2
DUS1L	PLP2	MTHFD1	SEMA3F	SEC14L1	GPC3	SV2B
CRABP-I	TOMM40	L1TD1	RNF208	EEF1D	PTK7	BIK
RIPK1	CDC20	E130012A19RIK	TCF4	WDR41	MOB1A	CSRP2
MAL2	TSFM	XLR4A	CASP2	NOG	NSD2	HBB-Y
TMCC3	EIF3J1	FOXH1	RASA3	RTN1	MTCH1	AB023957
NME4	TIMM8A1	TCFL5	SERPINF1	KDM5B	POLR2A	PRR18
ANKRD66	HMGN2	PLAC8	FGF17	PRDX3	POM121	LOC100048436
KPNA6	RPL28	LIN28	EMP1	CLSTN1	IGF2BP1	IDH1
PPIF	MRPL24	PVRL2	CHST8	PGAP2	GOLM1	LYPD6
CHST3	SUGT1	2610305D13RIK	RPRM	GDPD1	TRIM2	RCAN3
PCYT1B	RPS2	VKORC1	STXBP1	HMGB2	NREP	ENDOD1
PFKL	CNBP	KCNK1	CDC2L6	HMGB1	CT573034.3	TDRKH
NOV	FRZB	LOC433801	ARHGEF3	ARAP2	DNMT1	LRP2
PKIB	NACA	RBPMS	CPXM1	SRSF6	COL2A1	4933421H10RIK
MTDH	PITHD1	BEX4	SIM2	SWAP70	TPM4	THSD2
MDM2	HSPD1	2510009E07RIK	E030026I10RIK	MID1	UBE2Q1	PLEKHG2
GABRG2	ADRM1	ATIC	COPZ2	GLIPR2	HOXB3	BC039093
ABHD17A	SELENOW	RPL31	NFATC4	CCNL1	DOCK7	DAZAP2
SIKE1	RPLP2	TES	NFATC1	YWHAZ	MT-ND6	DYNC1I1
ATP5C1	DDT	PORCN	ADAMTSL2	CLTA	SOX2	TAX1BP3
TCOF1	TMEM59L	GNL3	AXL	RCN2	FIGNL2	LOC676420
SSH2	VPS29	ANXA11	GPX8	NMRK1	CIB1	NNAT
GTSE1	AURKAIP1	MLF1	CD63	GAPDH	KMT2E	ENO3
GM2A	KRT18	DNMT3B	LOC100040592	MGST3	GM10260	CIRBP
ARSA	UBE2K	FHL1	FSTL4	TMEM199	SMAD4	GLS2
DPYSL4	MRPL17	PITX2	KCNAB3	SNX1	NRARP	IGFBP7
ASCC1	RPS12	BEX4	RELL1	IGFBP4	ELP2	OCIAD2
COPS5	NAA20	GABRB3	ANXA2	DHX37	ARID3A	LMO2
MSGN1	MRPL12	BCAT1	RHBDF1	RNF10	NUCKS1	TAPT1
SEMA6B	UCHL3	EEF1D	TMEM98	AKR1B10L1	ENC1	NDRG2
CARMIL1	NUP43	PDZRN3	SEPN1	PHLDA2	HK2	BOK
ANKRD17	SDHB	SLC38A8	HOXD3	CA9	RASL2-9	MMP17
MED21	PPIG	FZD5	3110013H01RIK	SOBP	HCFC1	GSTK1
GATA2	STX3	MAPK8IP2	PHF2	FGD3	SRRM2	D630014A15RIK
TMEM39A	RPL14	7420416P09RIK	LIMA1	RBM5	LDHA	PGM2
DCAF13	GNG3	STX3	CTSA	GJC1	LIMCH1	HES6
WDR77	UBB		TMEM50B	SPIN1Z	HOXD10	RASL11B
PANK1	KHDRBS1		2810022L02RIK	SPATS2	SPARCL1	STK38L
CNN2	YWHAH		SMYD2	GNG10	TCEA1	RFTN2
LRRFIP2	ITM2B		SCARF2	RAB22A	IDH2	ETFA
SPOPL	MPLKIP		SUSD4	PSMD13	SOCS2	TMSB4X
ERMARD	SLC7A3		MMP2	PNISR	IGF2BP2	TSPAN7
NSG1	TCEAL9		CRAT	SLC25A14	APPBP2	FGF17
ATP13A3	FCF1		D0H4S114	HSP90AB1	EIF4G1	TDRD7
TLCD2	RPL41		ANXA5	IGHMBP2	PAFAH1B2	LRP12
PPRC1	RSL1D1		SLC39A6	SRGAP3	TJP1	DSCR1L2
TTC39A	ZFAND6		IGFBP5	ENPP4	ACO2	SC4MOL
LRRC3B	DDX39		CYP51	SERBP1	PRRC2B	TMEM98
ATP5MC1	SSR2		EPHA2	TFB2M	SFPQ	DPYSL4
NOL8	ARF5		HEY1	TXNDC5	TCF4	TGFBI
BUD31	ARXES1		DSCR6	FBP2	P3H3	KIF26B
ACBD3	RUVBL2		HOXD8	CYTL1	PTPA	HOXC10
TMEM69	NDUFA13		LXN	VCP	ILF3	HOXC10
CHCHD4	RPS13		ST3GAL6	CHN1	IGSF9	2010111I01RIK
HSD17B10	PID1		DENND2A	NIFK	KLHL9	ELF3
MSMO1	VBP1		NOTCH3	SFPQ	ADGRA3	SALL1
TNFAIP8L3	BRMS1		HEBP1	MRPL12	SUPT16	EPB4.9
CRHBP	UQCC3		PPIC	PDS5B	TRIL	CD83
TUBD1	ARL6IP5		PTPDC1	NDUFS6	TNPO1	EFEMP2
ADSS	UBE2S		ITGA11	NBL1	IFNGR2	CPNE2
TRIM71	ETV4		HOXD10	SLC49A3	CENPV	SLC1A4
TBC1D8	FAM92A		NES	L2HGDH	HEG1	ART5
RMND1	RPS15		TDRKH	MPV17	ENY2	2610027C15RIK
RAN	CENPX		LRP12	ERI2	PTP4A2	CRIM2
SNCAIP	NDUFA8		FAM171A2	N6AMT1	TAB2	TUBA1A
DHRS3	PSMC6		HSD17B11	PTPRM	CELSR1	ABCB1B
GCSH	MRPL23		SCARA3	TBCA	LDLR	SCD2
C4	EIF1		FOXD1	EMC1	FAT1	BBC3
C12orf43	ARPP19		RASL11B	RUFY3	TRIM28	CASP6
TAGLN	GTF2E2		GPR83	EIF3E	RBM15B	CASP6
GNL2	RRP15		CDKN1C	RBM45	FEM1B	DUSP6
SRD5A2	ACP1		BCL11A	SLC25A3	BRI3BP	OAT
LRRFIP1	DTD1		TIMP2	KCTD1	JUND	SYAP1
AGPAT3	UBE2D3		BMP1	LVRN	SON	DPYSL2
CCDC149	RWDD1		SV2B	WASF3	ARID2	HOXD12
SNX5	RPL26		SDC3	OSBPL7	STT3B	OASL2
POU2F3	CDX2		GPX3	HOXB13	GJC1	PRKCDBP
EXFABP	CAPZA2		GPC3	CHAC1	AUTS2	CYP26A1
MAP7	MRPL58		GALK1	MRPL50	LASP1	SMYD2
PIN1	FABP7		FGF8	GNPDA1	EID1	CYP27A1
PHLPP1	GCSH		CSRP2	SSU72	PRKAG2	RNF11
LITAF	TMEM165		ATP1A2	TRAPPC6B	IER5	PCDH21
MCF2L2	BST2		HBB-Y	WDR76	ARCN1	MFAP2
KIAA1671	PAM16		AB023957	SRPRA	RPL10-PS3	MFAP2
GATA5	PSMA2		NFIB	AP5S1	BPTF	PECI
ABCF2	VDAC3		PRR18	HBM	AP1M1	PLEKHG2
KIF7	ALKBH7		IDH1	FLT4	RNF145	BMP1
ASIP	G3BP1		LYPD6	CYP39A1	NIN	DYNC1I1
ATP8B2	RPL21		RCAN3	SNRPE	CELF1	GREB1
PLA2R1	TMEM256		ENDOD1	PSMC2	UBN2	TPM1
ABL2	OAZ1		TDRKH	ARPP19	ITGB1	SCARA5
BLVRA	FAM96A		4933421H10RIK	AP3M2	EHMT1	MLLT3
PLXNA2	UQCRC1		THSD2	FBXO9	MT-ND2	CD63
BEST4	MRPL54		PLEKHG2	COLEC12	DDAH2	6430527G18RIK
KDM2A	PPIB		BC039093	STON1	SEMA3A	CD40
AFG1L	PIGX		DAZAP2	HNRNPA3	HNRNPA2B1	ELK3
AKAP11	PSMG1		STC2	ZCCHC8	PCBP1	CD63
RGS10			DYNC1I1	CHRAC1		4833426J09RIK
R3HCC1L			TIMP3	GTF2E2		RAP2C
PHYHIPL			TAGLN3	TAF12		ANXA3
RNLS			COL5A1	HNRNPR		HBB-Y
MAP3K1			LOC676420	BABAM2		OGFRL1
TAF4B			ENO3	ALDH4A1		ZKSCAN1
FGF22			COL2A1	AHSA2		ST5
TCF7L1			COL2A1	SNRPB2		AI316807
MYH7			DOCK6	PEX16		PRKAG2
FAIM2			HSPB8	ANXA5		ODZ4
FRS3			CIRBP	RHEB		FAM108A
MYO9A			IGFBP7	CCNL2
MRC1			KCNE1L	H2AFY2
NAA10			OCIAD2	STIL
MYSM1			LMO2	RBM33
SYT12			MIB2	TOP2A
EYA1			FCRLS	EIF2AK1
SLC38A10			TAPT1	CAND1
UBA5			NDRG2	TRAFD1
UBASH3B			HOXC9	USP46
DOCK10			2610009E16RIK	RAD23A
DHX8			D630014A15RIK	ABRACL
DGKI			HES6	MTURN
LMBR1L			RASL11B	RPL4
DAB2IP			STK38L	SRSF4
CNTF			RFTN2	UBE2S
PAN3			STEAP2	LEPROTL1
CLMN			HOXD9	NDUFB4
VPS37B			HSPB6	ST3GAL2
CD36			CYBA	MCM5
CAV3			TSPAN7	PRPF6
HYAL2			AES	PTGR1
MAK16			PPIC	MRPL1
CPN1			FGF17	HNRNPH3
FAM234B			LBH	FGFR1OP2
IFT20			TDRD7	HNRNPAB
MYL9			LRP12	ITGB1BP1
CDX4			DSCR1L2	WDHD1
ACSF2			SC4MOL	AGBL1
ARL5B				PHACTR1
ADI1				FAM45A
CHORDC1			SERINC2	PSMC5
NT5C2			TMEM98	HENMT1
HDAC1			DPYSL4	RGS17
PTPN2			TGFBI	NFU1
PDK1			IRF1	FYN
TACC3			KIF26B	MAP1LC3B
CGNL1			PODXL2	DCBLD2
USP19			HOXC10	CETN3
RAB35			HOXC10	ANKRA2
			2010111I01RIK	MRPL37
			ITGA5	MMADHC
			ELF3	DAZAP2
			NGFR	TMEM267
			SALL1	HOXB9
			ARPC1B	LTF
			ARPC1B	ATP5F1D
			EPB4.9	NDFIP1
			CD83	CYB5A
			EFEMP2	IST1
			VWA2	RIC8A
			SERPINE2	IL17RD
			S100A11	EEF2
			SLC1A4	SNRPN
			ART5	SPRY2
			2610027C15RIK	CCDC80
			TMEM35	CTH
			MBD1	GRB2
			SSBP4	MBTPS1
			AKT3	H3F3B
			H19	ADA2
			CRIM2	SMARCA2
			NDFIP1	CMC4
			TUBA1A	VAV3
			ABCB1B	B3GNT7
			PTMS	ERCC5
			CASP6	RNF2
			CASP6	ELK3
			DUSP6	TPM4
			PBK	DHRS4
			IGFBP2	EIF5
			NENF	CTBP1
			SYAP1	SRSF2
			HOXB7	YTHDC1
			DPYSL2	DCAF12
			HOXD12	MAPK6
			OASL2	COPS2
			PRKCDBP	MCRS1
			CYP26A1	MCPH1
			SMYD2	SDR42E1
			CYP27A1	HIST1H46L2
			CYP27A1	FSIP1
			BGN	MLLT10
			APCDD1	PRLR
			RNF11	PTPRZ1
			LAMA1	YPEL1
			PCDH21	C1H12ORF57
			MFAP2	CXCR4
			MFAP2	FAM210A
			D12ERTD553E	MZT1
			EMP3	FGF1
			PLEKHG2	RPP25L
			S100A13	SLC18B1
			BMP1	YWHAB
			DYNC1I1	COL3A1
			TMEM119	WDR5
			UNC84B	COQ8B
			GREB1	CDC42SE1
			TPM1	FARP2
			SCARA5	RNASEH2B
			CD63	POFUT1
			PALLD	NDUFS4
			BCOR	ISOC1
			6430527G18RIK	VPS13C
			CD40	EIF4EBP2
			ELK3	MCM3
			H1FX	SLC25A16
			SKIL	PTPN6
			CD63	RHOA
			YPEL3	GGPS1
			ANXA3	WBP1
			HBB-Y	PLOD1
			GNG2	UBE2H
			OGFRL1	ACAT1
			FURIN	IP6K2
			ZKSCAN1
			PJA2
			ST5
			CDH3
			ETS1
			ANKRD50
			AI316807

## Sheet: Early late vs Wymeersch 2019
Item	Occurences	Present In		Early NMP gene			Late NMP gene			DEGs up		DEGs down									Lane1	Guillot_Chicken NMPearly ∩ Guillot Mouse NMP early	Guillot_Chicken NMPearly ∩ DEGs up in E8.5 NSB	Guillot_Chicken NMPearly ∩ DEGs down in E8.5 NSB	Guillot_Chicken NMPearly ∩ Guillot_Chicken NMPlate	Guillot_Chicken NMPearly ∩ Guillot Mouse NMP late	Guillot_Chicken NMPearly ∩ DEGs up in E10.5 CNH	Guillot_Chicken NMPearly ∩ DEGs down in E10.5 CNH	Lane2	Guillot Mouse NMP early ∩ DEGs up in E8.5 NSB	Guillot Mouse NMP early ∩ DEGs down in E8.5 NSB	Guillot Mouse NMP early ∩ Guillot_Chicken NMPlate	Guillot Mouse NMP early ∩ Guillot Mouse NMP late	Guillot Mouse NMP early ∩ DEGs up in E10.5 CNH	Guillot Mouse NMP early ∩ DEGs down in E10.5 CNH	Lane3	DEGs up in E8.5 NSB ∩ DEGs down in E8.5 NSB	DEGs up in E8.5 NSB ∩ Guillot_Chicken NMPlate	DEGs up in E8.5 NSB ∩ Guillot Mouse NMP late	DEGs up in E8.5 NSB ∩ DEGs up in E10.5 CNH	DEGs up in E8.5 NSB ∩ DEGs down in E10.5 CNH	Lane4	DEGs down in E8.5 NSB ∩ Guillot_Chicken NMPlate	DEGs down in E8.5 NSB ∩ Guillot Mouse NMP late	DEGs down in E8.5 NSB ∩ DEGs up in E10.5 CNH	DEGs down in E8.5 NSB ∩ DEGs down in E10.5 CNH	Lane5	Guillot_Chicken NMPlate ∩ Guillot Mouse NMP late	Guillot_Chicken NMPlate ∩ DEGs up in E10.5 CNH
CDH1	4	Guillot_Chicken NMPearly, Guillot Mouse NMP early, DEGs up in E8.5 NSB, DEGs down in E10.5 CNH																				WNT8A	WNT8A	PGM2		USP19	PGM2	SOX17		WNT8A	IGFBP2	UBE2S		IGFBP2	RANGRF			RASGRP3	SMTNL2		CDH1		ZEB1	WNT5A	ZKSCAN1			YWHAZ	ZEB1
CDX1	4	Guillot_Chicken NMPearly, Guillot Mouse NMP early, DEGs up in E8.5 NSB, DEGs down in E10.5 CNH																				TSPAN13	TRIM71	PDK1		SEMA3A	DPYSL4	PRTG		WFDC2		TALDO1		ETFA	POU5F1			PMP22	RPL38		CDX1		WNT5A	UCHL1	ZFP521			YWHAG	WNT5A
DAZAP2	4	DEGs down in E8.5 NSB, Guillot_Chicken NMPlate, Guillot Mouse NMP late, DEGs up in E10.5 CNH																				TOMM20	SOX17	FN1		PHF10		PDGFA		UPP1		SRSF7			POLR1D			PHLDA2			EEF1D		WBP1	TUBA1A	ZFP46			YWHAB	SALL1
EEF1D	4	Guillot Mouse NMP early, DEGs up in E8.5 NSB, Guillot_Chicken NMPlate, DEGs down in E10.5 CNH			Lane 1																	SP5	PRTG	DPYSL4		PDK1		KRT18		TRH		SNRPN			PLP2			EEF1D			KRT18		VIM	TMEM132C	ZEB1			YBX3	RRM1
GREB1	4	DEGs down in E8.5 NSB, Guillot_Chicken NMPlate, Guillot Mouse NMP late, DEGs up in E10.5 CNH																				RAN	PPAT	CTSA		MSMO1		GART		STX3		RPL8			PHLDA2			DUT			PHLDA2		TIMP3	TCF4	WNT5A			WNT5A	RASL11B
HOXA5	4	DEGs down in E8.5 NSB, Guillot_Chicken NMPlate, Guillot Mouse NMP late, DEGs up in E10.5 CNH																				KRT18	PDZRN3	CPN1		MDK		CDX1		SLC7A3		RPL35			NR6A1						ANKMY2		SALL1	SULF2	WHRN			TUBA1B	LYPD6B
HOXC10	4	DEGs down in E8.5 NSB, Guillot_Chicken NMPlate, Guillot Mouse NMP late, DEGs up in E10.5 CNH			Lane 2																	HSP90AA1	MESP1	BLVRA		FN1		CDH1		RXRG		RPL29			KRT18						APOE		RASL11B	SREBF2	VSTM2B			TPM4	IL17RD
HOXD4	4	DEGs down in E8.5 NSB, Guillot_Chicken NMPlate, Guillot Mouse NMP late, DEGs up in E10.5 CNH																				HDAC1	KRT18			CDH2		ANKMY2		RBPMS2		RPL27			GRSF1						BEX4		NDFIP1	SOCS2	VEGFC			TMEM123	IGFBP2
IGF1R	4	DEGs down in E8.5 NSB, Guillot_Chicken NMPlate, Guillot Mouse NMP late, DEGs up in E10.5 CNH																				GCSH	HSP90AA1			ACOT7				RBP1		RPL11			FST						CAR4		LYPD6B	SLC39A6	TXNIP			TCF12	IGF1R
IGFBP2	4	Guillot Mouse NMP early, DEGs down in E8.5 NSB, Guillot_Chicken NMPlate, DEGs up in E10.5 CNH			Lane 3																	EXOSC7	GBX2							RBBP7		PYM1			EEF1D						CHCHD10		IL17RD	SERF1	TULP4			SPATS2	HP1BP3
IL17RD	4	DEGs down in E8.5 NSB, Guillot_Chicken NMPlate, Guillot Mouse NMP late, DEGs up in E10.5 CNH																				EPCAM	CDX1							POU5F1		PSMC5			CHCHD10						FST		IGFBP2	SALL1	TUBA1A			SOD1	HOXD4
KRT18	4	Guillot_Chicken NMPearly, Guillot Mouse NMP early, DEGs up in E8.5 NSB, DEGs down in E10.5 CNH																				CTSZ	CDH1							POLR1D		PHLDA2			CDX1						GRSF1		IGF1R	RPRM	TSPAN7			SFPQ	HOXD12
PHLDA2	4	Guillot Mouse NMP early, DEGs up in E8.5 NSB, Guillot_Chicken NMPlate, DEGs down in E10.5 CNH			Lane 4																	CDX1	BCAT1							PHLDA2		NDUFS4			CDH1						NR6A1		HP1BP3	PTMS	TRPS1			SALL1	HOXC12
SALL1	4	DEGs down in E8.5 NSB, Guillot_Chicken NMPlate, Guillot Mouse NMP late, DEGs up in E10.5 CNH																				CDH1	ANKMY2							NR6A1		MRPL12			CAR4						POLR1D		HOXD8	PTK7	TRIB2			NREP	HOXC10
WNT5A	4	DEGs down in E8.5 NSB, Guillot_Chicken NMPlate, Guillot Mouse NMP late, DEGs up in E10.5 CNH																				BCAT1								NKX1-2		IGFBP2			BEX4						POU5F1		HOXD4	PDK1	TPM1			IL17RD	HOXA5
2010111I01RIK	3	DEGs down in E8.5 NSB, Guillot Mouse NMP late, DEGs up in E10.5 CNH			Lane 5																	ATP5C1								NEFM		ID3			APOE						PRTG		HOXD12	PALLD	TOB1			IGF1R	GREB1
2610528A11RIK	3	DEGs down in E8.5 NSB, Guillot Mouse NMP late, DEGs up in E10.5 CNH																												KRT18		HSP90AB1									SOX17		HOXC9	NRARP	TMEM98			HOXD4	GPX8
6330403K07RIK	3	DEGs down in E8.5 NSB, Guillot Mouse NMP late, DEGs up in E10.5 CNH																												HSP90AA1		HMGB2									0610030P10RIK		HOXC12	NCAM1	TMEM50B			HOXD11	ELK3
ANKMY2	3	Guillot_Chicken NMPearly, DEGs up in E8.5 NSB, DEGs down in E10.5 CNH			Lane 6																									HOXA1		HMGB1									1810015A11RIK		HOXC10	MLLT3	TIMP2			HOXC9	DAZAP2
APOE	3	Guillot Mouse NMP early, DEGs up in E8.5 NSB, DEGs down in E10.5 CNH																												GRSF1		H3F3B									2510009E07RIK		HOXA5	MAGED2	THSD2			HOXC8	CPNE2
BCAT1	3	Guillot_Chicken NMPearly, Guillot Mouse NMP early, DEGs up in E8.5 NSB																												FST		H2AFZ									ADSSL1		GREB1	LIMCH1	TGFBI			HOXC10
BEX4	3	Guillot Mouse NMP early, DEGs up in E8.5 NSB, DEGs down in E10.5 CNH			Lane 7																									FKBP11		GTF2E2									AKP2		GPX8	KIF26B	TDRKH			HOXB9
CAR4	3	Guillot Mouse NMP early, DEGs up in E8.5 NSB, DEGs down in E10.5 CNH																												FGFBP3		GLO1									ANXA11		ELK3	IL17RD	TDRD7			HOXA9
CCNJL	3	DEGs down in E8.5 NSB, Guillot Mouse NMP late, DEGs up in E10.5 CNH																												EMB		EIF3E									ATIC		DAZAP2	IGF2	TCF4			HOXA5
CD63	3	DEGs down in E8.5 NSB, Guillot Mouse NMP late, DEGs up in E10.5 CNH																												EEF1D		EEF1D									CAD		ANXA5	IGF1R	TCF15			HOXA10
CHCHD10	3	Guillot Mouse NMP early, DEGs up in E8.5 NSB, DEGs down in E10.5 CNH																												DUT		DUT									CCND2		ANXA2	HOXD9	TAPT1			HNRNPAB
CHD3	3	DEGs down in E8.5 NSB, Guillot Mouse NMP late, DEGs up in E10.5 CNH																												DNMT3B		CENPX									CCNE1			HOXD4	T			HNRNPA2B1
CSRP2	3	DEGs down in E8.5 NSB, Guillot Mouse NMP late, DEGs up in E10.5 CNH																												CRIP2		BTF3									CELSR3			HOXD10	SYDE1			GREB1
CYP26A1	3	DEGs down in E8.5 NSB, Guillot Mouse NMP late, DEGs up in E10.5 CNH																												CITED2		ARPP19									CLIC6			HOXC9	SYAP1			GJC1
CYP51	3	DEGs down in E8.5 NSB, Guillot Mouse NMP late, DEGs up in E10.5 CNH																												CHCHD10											CXX1C			HOXC6	SV2B			EEF1A1
DPYSL2	3	DEGs down in E8.5 NSB, Guillot Mouse NMP late, DEGs up in E10.5 CNH																												CDX1											DHRS7			HOXC10	SUSD4			DYNLL2
DPYSL4	3	Guillot_Chicken NMPearly, DEGs down in E8.5 NSB, DEGs up in E10.5 CNH																												CDH1											DNAHC11			HOXA5	SULF2			DAZAP2
DUSP6	3	DEGs down in E8.5 NSB, Guillot Mouse NMP late, DEGs up in E10.5 CNH																												CAR4											DPP4			HBB-Y	STK38L			CTNNB1
DUT	3	Guillot Mouse NMP early, DEGs up in E8.5 NSB, Guillot_Chicken NMPlate																												BEX4											DSG2			HBB-BH1	STAT3			CBX3
ELK3	3	DEGs down in E8.5 NSB, Guillot_Chicken NMPlate, DEGs up in E10.5 CNH																												BCAT1											E430003D02RIK			HBA-X	ST5			CAND1
ETS2	3	DEGs down in E8.5 NSB, Guillot Mouse NMP late, DEGs up in E10.5 CNH																												APOE											F11R			H2AFY	SREBF2			ACTG1
FADS1	3	DEGs down in E8.5 NSB, Guillot Mouse NMP late, DEGs up in E10.5 CNH																																							FAH			H19	SPSB1			ACTB
FAT1	3	DEGs down in E8.5 NSB, Guillot Mouse NMP late, DEGs up in E10.5 CNH																																							FBLIM1			GREB1	SPOCK2
FGF17	3	DEGs down in E8.5 NSB, Guillot Mouse NMP late, DEGs up in E10.5 CNH																																							FHL1			GPC3	SOCS2
FN1	3	Guillot_Chicken NMPearly, DEGs down in E8.5 NSB, Guillot Mouse NMP late																																							FRAT2			FOXD1	SMYD2
FOXD1	3	DEGs down in E8.5 NSB, Guillot Mouse NMP late, DEGs up in E10.5 CNH																																							GABRB3			FN1	SMUG1
FST	3	Guillot Mouse NMP early, DEGs up in E8.5 NSB, DEGs down in E10.5 CNH																																							GLDC			FGF17	SMOX
GPX8	3	DEGs down in E8.5 NSB, Guillot_Chicken NMPlate, DEGs up in E10.5 CNH																																							GMFG			FAT1	SLC4A1
GRSF1	3	Guillot Mouse NMP early, DEGs up in E8.5 NSB, DEGs down in E10.5 CNH																																							GNA14			FADS1	SLC39A6
HBA-X	3	DEGs down in E8.5 NSB, Guillot Mouse NMP late, DEGs up in E10.5 CNH																																							GPD2			ETS2	SLC2A6
HBB-BH1	3	DEGs down in E8.5 NSB, Guillot Mouse NMP late, DEGs up in E10.5 CNH																																							GPX2			DUSP6	SLC1A4
HBB-Y	3	DEGs down in E8.5 NSB, Guillot Mouse NMP late, DEGs up in E10.5 CNH																																							HSPBAP1			DPYSL2	SLC19A2
HOXC12	3	DEGs down in E8.5 NSB, Guillot_Chicken NMPlate, DEGs up in E10.5 CNH																																							IQGAP1			DAZAP2	SHISA2
HOXC9	3	DEGs down in E8.5 NSB, Guillot_Chicken NMPlate, Guillot Mouse NMP late																																							KCNK1			CYP51	SH3PXD2B
HOXD10	3	DEGs down in E8.5 NSB, Guillot Mouse NMP late, DEGs up in E10.5 CNH																																							KRT8			CYP26A1	SERPINF1
HOXD12	3	DEGs down in E8.5 NSB, Guillot_Chicken NMPlate, DEGs up in E10.5 CNH																																							KRTCAP3			CSRP2	SERF1
HP1BP3	3	DEGs down in E8.5 NSB, Guillot_Chicken NMPlate, DEGs up in E10.5 CNH																																							L1TD1			COL2A1	SEMA5B
HSP90AA1	3	Guillot_Chicken NMPearly, Guillot Mouse NMP early, DEGs up in E8.5 NSB																																							LLGL2			CHD3	SEMA3F
KIF26B	3	DEGs down in E8.5 NSB, Guillot Mouse NMP late, DEGs up in E10.5 CNH																																							LOC383897			CDKN1C	SCARA5
LIMCH1	3	DEGs down in E8.5 NSB, Guillot Mouse NMP late, DEGs up in E10.5 CNH																																							LOC386405			CD63	SC4MOL
LYPD6B	3	DEGs down in E8.5 NSB, Guillot_Chicken NMPlate, DEGs up in E10.5 CNH																																							MDN1			CCNJL	SAMD9L
MAGED2	3	DEGs down in E8.5 NSB, Guillot Mouse NMP late, DEGs up in E10.5 CNH																																							MEIS2			6330403K07RIK	SAMD14
MLLT3	3	DEGs down in E8.5 NSB, Guillot Mouse NMP late, DEGs up in E10.5 CNH																																							MND1			2610528A11RIK	SALL1
NR6A1	3	Guillot Mouse NMP early, DEGs up in E8.5 NSB, DEGs down in E10.5 CNH																																							MRG1			2010111I01RIK	RNF208
PALLD	3	DEGs down in E8.5 NSB, Guillot Mouse NMP late, DEGs up in E10.5 CNH																																							MTHFD1				RNF11
PDK1	3	Guillot_Chicken NMPearly, DEGs down in E8.5 NSB, Guillot Mouse NMP late																																							NME3				RHOB
PGM2	3	Guillot_Chicken NMPearly, DEGs down in E8.5 NSB, DEGs up in E10.5 CNH																																							NT5E				RHBDF1
POLR1D	3	Guillot Mouse NMP early, DEGs up in E8.5 NSB, DEGs down in E10.5 CNH																																							PDZK1				RFTN2
POU5F1	3	Guillot Mouse NMP early, DEGs up in E8.5 NSB, DEGs down in E10.5 CNH																																							PKP2				RELL1
PRTG	3	Guillot_Chicken NMPearly, DEGs up in E8.5 NSB, DEGs down in E10.5 CNH																																							PLCG2				RCAN3
RASL11B	3	DEGs down in E8.5 NSB, Guillot_Chicken NMPlate, DEGs up in E10.5 CNH																																							PLEKHA2				RASL11B
SERF1	3	DEGs down in E8.5 NSB, Guillot Mouse NMP late, DEGs up in E10.5 CNH																																							PRAMEL4				RASA3
SLC39A6	3	DEGs down in E8.5 NSB, Guillot Mouse NMP late, DEGs up in E10.5 CNH																																							PRSS8				PTPDC1
SOCS2	3	DEGs down in E8.5 NSB, Guillot Mouse NMP late, DEGs up in E10.5 CNH																																							PVRL2				PRR18
SOX17	3	Guillot_Chicken NMPearly, DEGs up in E8.5 NSB, DEGs down in E10.5 CNH																																							RBPMS				PRKCDBP
SREBF2	3	DEGs down in E8.5 NSB, Guillot Mouse NMP late, DEGs up in E10.5 CNH																																							RPL31				POGK
SULF2	3	DEGs down in E8.5 NSB, Guillot Mouse NMP late, DEGs up in E10.5 CNH																																							RRP12				PLEKHG2
TCF4	3	DEGs down in E8.5 NSB, Guillot Mouse NMP late, DEGs up in E10.5 CNH																																							SLC13A4				PGM2
TUBA1A	3	DEGs down in E8.5 NSB, Guillot Mouse NMP late, DEGs up in E10.5 CNH																																							SLC9A3R1				PEA15A
WNT8A	3	Guillot_Chicken NMPearly, Guillot Mouse NMP early, DEGs up in E8.5 NSB																																							SNURF				PEA15
ZEB1	3	DEGs down in E8.5 NSB, Guillot_Chicken NMPlate, DEGs up in E10.5 CNH																																							SPINK3				PDIA5
0610030P10RIK	2	DEGs up in E8.5 NSB, DEGs down in E10.5 CNH																																							SPINT1				PCDH21
1200009O22RIK	2	DEGs down in E8.5 NSB, DEGs up in E10.5 CNH																																							STMN2				PARD6G
1810015A11RIK	2	DEGs up in E8.5 NSB, DEGs down in E10.5 CNH																																							SULT4A1				PALLD
2310016C16RIK	2	DEGs down in E8.5 NSB, DEGs up in E10.5 CNH																																							TCFL5				OXCT1
2510009E07RIK	2	DEGs up in E8.5 NSB, DEGs down in E10.5 CNH																																							TES				OGFRL1
2610024H22RIK	2	DEGs down in E8.5 NSB, DEGs up in E10.5 CNH																																							TMEM82				ODZ4
2610027C15RIK	2	DEGs down in E8.5 NSB, DEGs up in E10.5 CNH																																							TNFRSF21				OCIAD2
2810022L02RIK	2	DEGs down in E8.5 NSB, DEGs up in E10.5 CNH																																							VKORC1				OASL2
2900060P06RIK	2	DEGs down in E8.5 NSB, DEGs up in E10.5 CNH																																							WFIKKN1				NUDT4
4632427N05RIK	2	DEGs down in E8.5 NSB, DEGs up in E10.5 CNH																																							XLR4A				NUAK1
4933421H10RIK	2	DEGs down in E8.5 NSB, DEGs up in E10.5 CNH																																							ZSCAN10				NPTX2
5830411I20	2	DEGs down in E8.5 NSB, DEGs up in E10.5 CNH																																											NOTCH4
6330407I18RIK	2	DEGs down in E8.5 NSB, DEGs up in E10.5 CNH																																											NOTCH3
6430527G18RIK	2	DEGs down in E8.5 NSB, DEGs up in E10.5 CNH																																											NKD2
9530068E07RIK	2	DEGs down in E8.5 NSB, DEGs up in E10.5 CNH																																											NES
A630082K20RIK	2	DEGs down in E8.5 NSB, DEGs up in E10.5 CNH																																											NDRG2
A730054J21RIK	2	DEGs down in E8.5 NSB, DEGs up in E10.5 CNH																																											MLLT3
A830059I20RIK	2	DEGs down in E8.5 NSB, DEGs up in E10.5 CNH																																											MKIAA0282
A830080H07RIK	2	DEGs down in E8.5 NSB, DEGs up in E10.5 CNH																																											MFSD2
AACS	2	DEGs down in E8.5 NSB, DEGs up in E10.5 CNH																																											MFAP4
AARD	2	DEGs down in E8.5 NSB, DEGs up in E10.5 CNH																																											MFAP2
AB023957	2	DEGs down in E8.5 NSB, DEGs up in E10.5 CNH																																											MELA
ABAT	2	DEGs down in E8.5 NSB, DEGs up in E10.5 CNH																																											MAGED2
ABCB1B	2	DEGs down in E8.5 NSB, DEGs up in E10.5 CNH																																											LYPD6B
ACAT2	2	DEGs down in E8.5 NSB, DEGs up in E10.5 CNH																																											LYPD6
ACOT7	2	Guillot_Chicken NMPearly, Guillot Mouse NMP late																																											LRP12
ACTB	2	Guillot_Chicken NMPlate, Guillot Mouse NMP late																																											LOC676640
ACTG1	2	Guillot_Chicken NMPlate, Guillot Mouse NMP late																																											LOC676420
ADAM23	2	DEGs down in E8.5 NSB, DEGs up in E10.5 CNH																																											LOC100046343
ADH6B	2	DEGs down in E8.5 NSB, DEGs up in E10.5 CNH																																											LOC100045869
ADSSL1	2	DEGs up in E8.5 NSB, DEGs down in E10.5 CNH																																											LOC100045413
AI316807	2	DEGs down in E8.5 NSB, DEGs up in E10.5 CNH																																											LOC100044221
AKP2	2	DEGs up in E8.5 NSB, DEGs down in E10.5 CNH																																											LOC100040592
ANTXR1	2	DEGs down in E8.5 NSB, DEGs up in E10.5 CNH																																											LMO2
ANXA11	2	DEGs up in E8.5 NSB, DEGs down in E10.5 CNH																																											LIMCH1
ANXA2	2	DEGs down in E8.5 NSB, Guillot_Chicken NMPlate																																											LIMA1
ANXA3	2	DEGs down in E8.5 NSB, DEGs up in E10.5 CNH																																											LAMP2
ANXA5	2	DEGs down in E8.5 NSB, Guillot_Chicken NMPlate																																											KLC4
ARPP19	2	Guillot Mouse NMP early, Guillot_Chicken NMPlate																																											KIF26B
ART5	2	DEGs down in E8.5 NSB, DEGs up in E10.5 CNH																																											KCNAB3
ATIC	2	DEGs up in E8.5 NSB, DEGs down in E10.5 CNH																																											IRF2
ATP5C1	2	Guillot_Chicken NMPearly, Guillot Mouse NMP early																																											IL17RD
B230343A10RIK	2	DEGs down in E8.5 NSB, DEGs up in E10.5 CNH																																											IL11RA1
B430110C06RIK	2	DEGs down in E8.5 NSB, DEGs up in E10.5 CNH																																											IGFBP7
B930041F14RIK	2	DEGs down in E8.5 NSB, DEGs up in E10.5 CNH																																											IGFBP3
BC039093	2	DEGs down in E8.5 NSB, DEGs up in E10.5 CNH																																											IGFBP2
BCL11A	2	DEGs down in E8.5 NSB, DEGs up in E10.5 CNH																																											IGF1R
BCL11B	2	DEGs down in E8.5 NSB, DEGs up in E10.5 CNH																																											IER3
BHLHB2	2	DEGs down in E8.5 NSB, DEGs up in E10.5 CNH																																											IDH1
BID	2	Guillot_Chicken NMPlate, DEGs down in E10.5 CNH																																											HSD17B7
BLVRA	2	Guillot_Chicken NMPearly, DEGs down in E8.5 NSB																																											HSD17B11
BMP1	2	DEGs down in E8.5 NSB, DEGs up in E10.5 CNH																																											HP1BP3
BTF3	2	Guillot Mouse NMP early, Guillot_Chicken NMPlate																																											HOXD4
C130092E12	2	DEGs down in E8.5 NSB, DEGs up in E10.5 CNH																																											HOXD3
C230043G09RIK	2	DEGs down in E8.5 NSB, DEGs up in E10.5 CNH																																											HOXD12
C230098O21RIK	2	DEGs down in E8.5 NSB, DEGs up in E10.5 CNH																																											HOXD10
C920004C08RIK	2	DEGs down in E8.5 NSB, DEGs up in E10.5 CNH																																											HOXC13
CAD	2	DEGs up in E8.5 NSB, DEGs down in E10.5 CNH																																											HOXC12
CAND1	2	Guillot_Chicken NMPlate, Guillot Mouse NMP late																																											HOXC10
CASP2	2	DEGs down in E8.5 NSB, DEGs up in E10.5 CNH																																											HOXA5
CASP6	2	DEGs down in E8.5 NSB, DEGs up in E10.5 CNH																																											HOXA11S
CBX3	2	Guillot_Chicken NMPlate, Guillot Mouse NMP late																																											HOPX
CCND2	2	DEGs up in E8.5 NSB, DEGs down in E10.5 CNH																																											HES6
CCNE1	2	DEGs up in E8.5 NSB, DEGs down in E10.5 CNH																																											HEBP1
CD40	2	DEGs down in E8.5 NSB, DEGs up in E10.5 CNH																																											HBB-Y
CD59A	2	DEGs down in E8.5 NSB, DEGs up in E10.5 CNH																																											HBB-BH1
CD83	2	DEGs down in E8.5 NSB, DEGs up in E10.5 CNH																																											HBA-X
CDH2	2	Guillot_Chicken NMPearly, Guillot Mouse NMP late																																											HAS2
CDKN1C	2	DEGs down in E8.5 NSB, Guillot Mouse NMP late																																											HADHB
CELSR1	2	Guillot Mouse NMP late, DEGs up in E10.5 CNH																																											GREB1
CELSR3	2	DEGs up in E8.5 NSB, DEGs down in E10.5 CNH																																											GPX8
CENPX	2	Guillot Mouse NMP early, Guillot_Chicken NMPlate																																											GPR83
CHST8	2	DEGs down in E8.5 NSB, DEGs up in E10.5 CNH																																											GNG12
CIB1	2	Guillot Mouse NMP late, DEGs up in E10.5 CNH																																											GMPR
CIRBP	2	DEGs down in E8.5 NSB, DEGs up in E10.5 CNH																																											GM22
CITED2	2	Guillot Mouse NMP early, DEGs up in E8.5 NSB																																											GJC2
CKB	2	DEGs down in E8.5 NSB, DEGs up in E10.5 CNH																																											GHR
CLIC6	2	DEGs up in E8.5 NSB, DEGs down in E10.5 CNH																																											GCNT2
COL2A1	2	DEGs down in E8.5 NSB, Guillot Mouse NMP late																																											GCAP26
COL4A1	2	Guillot_Chicken NMPlate, DEGs down in E10.5 CNH																																											GAD1
CPN1	2	Guillot_Chicken NMPearly, DEGs down in E8.5 NSB																																											FSTL4
CPNE2	2	Guillot_Chicken NMPlate, DEGs up in E10.5 CNH																																											FRMD4A
CRELD1	2	DEGs down in E8.5 NSB, DEGs up in E10.5 CNH																																											FOXD1
CRIM2	2	DEGs down in E8.5 NSB, DEGs up in E10.5 CNH																																											FMNL3
CRIP2	2	Guillot Mouse NMP early, DEGs up in E8.5 NSB																																											FGF17
CTNNB1	2	Guillot_Chicken NMPlate, Guillot Mouse NMP late																																											FERMT1
CTSA	2	Guillot_Chicken NMPearly, DEGs down in E8.5 NSB																																											FBLN2
CTSZ	2	Guillot_Chicken NMPearly, Guillot Mouse NMP early																																											FAT1
CXX1C	2	DEGs up in E8.5 NSB, DEGs down in E10.5 CNH																																											FAM171A2
CYP27A1	2	DEGs down in E8.5 NSB, DEGs up in E10.5 CNH																																											FADS1
D630014A15RIK	2	DEGs down in E8.5 NSB, DEGs up in E10.5 CNH																																											ETS2
DHRS7	2	DEGs up in E8.5 NSB, DEGs down in E10.5 CNH																																											ERAF
DNAHC11	2	DEGs up in E8.5 NSB, DEGs down in E10.5 CNH																																											EPB4.9
DNMT3B	2	Guillot Mouse NMP early, DEGs up in E8.5 NSB																																											ENO3
DPP4	2	DEGs up in E8.5 NSB, DEGs down in E10.5 CNH																																											ENDOD1
DSCR1L2	2	DEGs down in E8.5 NSB, DEGs up in E10.5 CNH																																											ELK3
DSCR6	2	DEGs down in E8.5 NSB, DEGs up in E10.5 CNH																																											ELF3
DSG2	2	DEGs up in E8.5 NSB, DEGs down in E10.5 CNH																																											EG244911
DUSP26	2	DEGs down in E8.5 NSB, DEGs up in E10.5 CNH																																											EFEMP2
DYNC1I1	2	DEGs down in E8.5 NSB, DEGs up in E10.5 CNH																																											E330009J07RIK
DYNLL2	2	Guillot_Chicken NMPlate, Guillot Mouse NMP late																																											DYSF
DYSF	2	DEGs down in E8.5 NSB, DEGs up in E10.5 CNH																																											DYNC1I1
E330009J07RIK	2	DEGs down in E8.5 NSB, DEGs up in E10.5 CNH																																											DUSP6
E430003D02RIK	2	DEGs up in E8.5 NSB, DEGs down in E10.5 CNH																																											DUSP26
EEF1A1	2	Guillot_Chicken NMPlate, Guillot Mouse NMP late																																											DSCR6
EFEMP2	2	DEGs down in E8.5 NSB, DEGs up in E10.5 CNH																																											DSCR1L2
EG244911	2	DEGs down in E8.5 NSB, DEGs up in E10.5 CNH																																											DPYSL4
EIF3E	2	Guillot Mouse NMP early, Guillot_Chicken NMPlate																																											DPYSL2
ELF3	2	DEGs down in E8.5 NSB, DEGs up in E10.5 CNH																																											DAZAP2
EMB	2	Guillot Mouse NMP early, DEGs up in E8.5 NSB																																											D630014A15RIK
ENDOD1	2	DEGs down in E8.5 NSB, DEGs up in E10.5 CNH																																											CYP51
ENO3	2	DEGs down in E8.5 NSB, DEGs up in E10.5 CNH																																											CYP27A1
EPB4.9	2	DEGs down in E8.5 NSB, DEGs up in E10.5 CNH																																											CYP26A1
EPCAM	2	Guillot_Chicken NMPearly, Guillot Mouse NMP early																																											CSRP2
ERAF	2	DEGs down in E8.5 NSB, DEGs up in E10.5 CNH																																											CRIM2
ETFA	2	Guillot Mouse NMP early, DEGs up in E10.5 CNH																																											CRELD1
EXOSC7	2	Guillot_Chicken NMPearly, Guillot Mouse NMP early																																											CKB
F11R	2	DEGs up in E8.5 NSB, DEGs down in E10.5 CNH																																											CIRBP
FAH	2	DEGs up in E8.5 NSB, DEGs down in E10.5 CNH																																											CHST8
FAM171A2	2	DEGs down in E8.5 NSB, DEGs up in E10.5 CNH																																											CHD3
FBLIM1	2	DEGs up in E8.5 NSB, DEGs down in E10.5 CNH																																											CD83
FBLN2	2	DEGs down in E8.5 NSB, DEGs up in E10.5 CNH																																											CD63
FERMT1	2	DEGs down in E8.5 NSB, DEGs up in E10.5 CNH																																											CD59A
FGFBP3	2	Guillot Mouse NMP early, DEGs up in E8.5 NSB																																											CD40
FHL1	2	DEGs up in E8.5 NSB, DEGs down in E10.5 CNH																																											CCNJL
FKBP11	2	Guillot Mouse NMP early, DEGs up in E8.5 NSB																																											CASP6
FMNL3	2	DEGs down in E8.5 NSB, DEGs up in E10.5 CNH																																											CASP2
FRAT2	2	DEGs up in E8.5 NSB, DEGs down in E10.5 CNH																																											C920004C08RIK
FRMD4A	2	DEGs down in E8.5 NSB, DEGs up in E10.5 CNH																																											C230098O21RIK
FSTL4	2	DEGs down in E8.5 NSB, DEGs up in E10.5 CNH																																											C230043G09RIK
GABRB3	2	DEGs up in E8.5 NSB, DEGs down in E10.5 CNH																																											C130092E12
GAD1	2	DEGs down in E8.5 NSB, DEGs up in E10.5 CNH																																											BMP1
GART	2	Guillot_Chicken NMPearly, DEGs down in E10.5 CNH																																											BHLHB2
GBX2	2	Guillot_Chicken NMPearly, DEGs up in E8.5 NSB																																											BCL11B
GCAP26	2	DEGs down in E8.5 NSB, DEGs up in E10.5 CNH																																											BCL11A
GCNT2	2	DEGs down in E8.5 NSB, DEGs up in E10.5 CNH																																											BC039093
GCSH	2	Guillot_Chicken NMPearly, Guillot Mouse NMP early																																											B930041F14RIK
GHR	2	DEGs down in E8.5 NSB, DEGs up in E10.5 CNH																																											B430110C06RIK
GJC1	2	Guillot_Chicken NMPlate, Guillot Mouse NMP late																																											B230343A10RIK
GJC2	2	DEGs down in E8.5 NSB, DEGs up in E10.5 CNH																																											ART5
GLDC	2	DEGs up in E8.5 NSB, DEGs down in E10.5 CNH																																											ANXA3
GLO1	2	Guillot Mouse NMP early, Guillot_Chicken NMPlate																																											ANTXR1
GM22	2	DEGs down in E8.5 NSB, DEGs up in E10.5 CNH																																											AI316807
GMFG	2	DEGs up in E8.5 NSB, DEGs down in E10.5 CNH																																											ADH6B
GMPR	2	DEGs down in E8.5 NSB, DEGs up in E10.5 CNH																																											ADAM23
GNA14	2	DEGs up in E8.5 NSB, DEGs down in E10.5 CNH																																											ACAT2
GNAS	2	Guillot Mouse NMP late, DEGs up in E10.5 CNH																																											ABCB1B
GNG12	2	DEGs down in E8.5 NSB, DEGs up in E10.5 CNH																																											ABAT
GPC3	2	DEGs down in E8.5 NSB, Guillot Mouse NMP late																																											AB023957
GPD2	2	DEGs up in E8.5 NSB, DEGs down in E10.5 CNH																																											AARD
GPR83	2	DEGs down in E8.5 NSB, DEGs up in E10.5 CNH																																											AACS
GPX2	2	DEGs up in E8.5 NSB, DEGs down in E10.5 CNH																																											A830080H07RIK
GTF2E2	2	Guillot Mouse NMP early, Guillot_Chicken NMPlate																																											A830059I20RIK
H19	2	DEGs down in E8.5 NSB, Guillot Mouse NMP late																																											A730054J21RIK
H2AFY	2	DEGs down in E8.5 NSB, Guillot Mouse NMP late																																											A630082K20RIK
H2AFZ	2	Guillot Mouse NMP early, Guillot_Chicken NMPlate																																											9530068E07RIK
H3F3B	2	Guillot Mouse NMP early, Guillot_Chicken NMPlate																																											6430527G18RIK
HADHB	2	DEGs down in E8.5 NSB, DEGs up in E10.5 CNH																																											6330407I18RIK
HAS2	2	DEGs down in E8.5 NSB, DEGs up in E10.5 CNH																																											6330403K07RIK
HDAC1	2	Guillot_Chicken NMPearly, Guillot Mouse NMP early																																											5830411I20
HEBP1	2	DEGs down in E8.5 NSB, DEGs up in E10.5 CNH																																											4933421H10RIK
HES6	2	DEGs down in E8.5 NSB, DEGs up in E10.5 CNH																																											4632427N05RIK
HMGB1	2	Guillot Mouse NMP early, Guillot_Chicken NMPlate																																											2900060P06RIK
HMGB2	2	Guillot Mouse NMP early, Guillot_Chicken NMPlate																																											2810022L02RIK
HNRNPA2B1	2	Guillot_Chicken NMPlate, Guillot Mouse NMP late																																											2610528A11RIK
HNRNPAB	2	Guillot_Chicken NMPlate, Guillot Mouse NMP late																																											2610027C15RIK
HOPX	2	DEGs down in E8.5 NSB, DEGs up in E10.5 CNH																																											2610024H22RIK
HOXA1	2	Guillot Mouse NMP early, DEGs up in E8.5 NSB																																											2310016C16RIK
HOXA10	2	Guillot_Chicken NMPlate, Guillot Mouse NMP late																																											2010111I01RIK
HOXA11S	2	DEGs down in E8.5 NSB, DEGs up in E10.5 CNH																																											1200009O22RIK
HOXA9	2	Guillot_Chicken NMPlate, Guillot Mouse NMP late
HOXB5	2	Guillot_Chicken NMPlate, DEGs down in E10.5 CNH
HOXB9	2	Guillot_Chicken NMPlate, Guillot Mouse NMP late
HOXC13	2	DEGs down in E8.5 NSB, DEGs up in E10.5 CNH
HOXC6	2	DEGs down in E8.5 NSB, Guillot Mouse NMP late
HOXC8	2	Guillot_Chicken NMPlate, Guillot Mouse NMP late
HOXD11	2	Guillot_Chicken NMPlate, Guillot Mouse NMP late
HOXD3	2	DEGs down in E8.5 NSB, DEGs up in E10.5 CNH
HOXD8	2	DEGs down in E8.5 NSB, Guillot_Chicken NMPlate
HOXD9	2	DEGs down in E8.5 NSB, Guillot Mouse NMP late
HSD17B11	2	DEGs down in E8.5 NSB, DEGs up in E10.5 CNH
HSD17B7	2	DEGs down in E8.5 NSB, DEGs up in E10.5 CNH
HSP90AB1	2	Guillot Mouse NMP early, Guillot_Chicken NMPlate
HSPBAP1	2	DEGs up in E8.5 NSB, DEGs down in E10.5 CNH
ID3	2	Guillot Mouse NMP early, Guillot_Chicken NMPlate
IDH1	2	DEGs down in E8.5 NSB, DEGs up in E10.5 CNH
IER3	2	DEGs down in E8.5 NSB, DEGs up in E10.5 CNH
IGF2	2	DEGs down in E8.5 NSB, Guillot Mouse NMP late
IGFBP3	2	DEGs down in E8.5 NSB, DEGs up in E10.5 CNH
IGFBP7	2	DEGs down in E8.5 NSB, DEGs up in E10.5 CNH
IL11RA1	2	DEGs down in E8.5 NSB, DEGs up in E10.5 CNH
IQGAP1	2	DEGs up in E8.5 NSB, DEGs down in E10.5 CNH
IRF2	2	DEGs down in E8.5 NSB, DEGs up in E10.5 CNH
KCNAB3	2	DEGs down in E8.5 NSB, DEGs up in E10.5 CNH
KCNK1	2	DEGs up in E8.5 NSB, DEGs down in E10.5 CNH
KLC4	2	DEGs down in E8.5 NSB, DEGs up in E10.5 CNH
KRT8	2	DEGs up in E8.5 NSB, DEGs down in E10.5 CNH
KRTCAP3	2	DEGs up in E8.5 NSB, DEGs down in E10.5 CNH
L1TD1	2	DEGs up in E8.5 NSB, DEGs down in E10.5 CNH
LAMP2	2	DEGs down in E8.5 NSB, DEGs up in E10.5 CNH
LIMA1	2	DEGs down in E8.5 NSB, DEGs up in E10.5 CNH
LIX1	2	Guillot Mouse NMP late, DEGs up in E10.5 CNH
LLGL2	2	DEGs up in E8.5 NSB, DEGs down in E10.5 CNH
LMO2	2	DEGs down in E8.5 NSB, DEGs up in E10.5 CNH
LOC100040592	2	DEGs down in E8.5 NSB, DEGs up in E10.5 CNH
LOC100044221	2	DEGs down in E8.5 NSB, DEGs up in E10.5 CNH
LOC100045413	2	DEGs down in E8.5 NSB, DEGs up in E10.5 CNH
LOC100045869	2	DEGs down in E8.5 NSB, DEGs up in E10.5 CNH
LOC100046343	2	DEGs down in E8.5 NSB, DEGs up in E10.5 CNH
LOC383897	2	DEGs up in E8.5 NSB, DEGs down in E10.5 CNH
LOC386405	2	DEGs up in E8.5 NSB, DEGs down in E10.5 CNH
LOC676420	2	DEGs down in E8.5 NSB, DEGs up in E10.5 CNH
LOC676640	2	DEGs down in E8.5 NSB, DEGs up in E10.5 CNH
LRP12	2	DEGs down in E8.5 NSB, DEGs up in E10.5 CNH
LYPD6	2	DEGs down in E8.5 NSB, DEGs up in E10.5 CNH
MDK	2	Guillot_Chicken NMPearly, Guillot Mouse NMP late
MDN1	2	DEGs up in E8.5 NSB, DEGs down in E10.5 CNH
MEIS2	2	DEGs up in E8.5 NSB, DEGs down in E10.5 CNH
MELA	2	DEGs down in E8.5 NSB, DEGs up in E10.5 CNH
MESP1	2	Guillot_Chicken NMPearly, DEGs up in E8.5 NSB
MFAP2	2	DEGs down in E8.5 NSB, DEGs up in E10.5 CNH
MFAP4	2	DEGs down in E8.5 NSB, DEGs up in E10.5 CNH
MFSD2	2	DEGs down in E8.5 NSB, DEGs up in E10.5 CNH
MKIAA0282	2	DEGs down in E8.5 NSB, DEGs up in E10.5 CNH
MND1	2	DEGs up in E8.5 NSB, DEGs down in E10.5 CNH
MRG1	2	DEGs up in E8.5 NSB, DEGs down in E10.5 CNH
MRPL12	2	Guillot Mouse NMP early, Guillot_Chicken NMPlate
MSMO1	2	Guillot_Chicken NMPearly, Guillot Mouse NMP late
MTHFD1	2	DEGs up in E8.5 NSB, DEGs down in E10.5 CNH
NCAM1	2	DEGs down in E8.5 NSB, Guillot Mouse NMP late
NDFIP1	2	DEGs down in E8.5 NSB, Guillot_Chicken NMPlate
NDN	2	Guillot Mouse NMP late, DEGs up in E10.5 CNH
NDRG2	2	DEGs down in E8.5 NSB, DEGs up in E10.5 CNH
NDUFS4	2	Guillot Mouse NMP early, Guillot_Chicken NMPlate
NEFM	2	Guillot Mouse NMP early, DEGs up in E8.5 NSB
NES	2	DEGs down in E8.5 NSB, DEGs up in E10.5 CNH
NKD2	2	DEGs down in E8.5 NSB, DEGs up in E10.5 CNH
NKX1-2	2	Guillot Mouse NMP early, DEGs up in E8.5 NSB
NME3	2	DEGs up in E8.5 NSB, DEGs down in E10.5 CNH
NNAT	2	Guillot Mouse NMP late, DEGs up in E10.5 CNH
NOTCH3	2	DEGs down in E8.5 NSB, DEGs up in E10.5 CNH
NOTCH4	2	DEGs down in E8.5 NSB, DEGs up in E10.5 CNH
NPTX2	2	DEGs down in E8.5 NSB, DEGs up in E10.5 CNH
NRARP	2	DEGs down in E8.5 NSB, Guillot Mouse NMP late
NREP	2	Guillot_Chicken NMPlate, Guillot Mouse NMP late
NT5E	2	DEGs up in E8.5 NSB, DEGs down in E10.5 CNH
NUAK1	2	DEGs down in E8.5 NSB, DEGs up in E10.5 CNH
NUDT4	2	DEGs down in E8.5 NSB, DEGs up in E10.5 CNH
OASL2	2	DEGs down in E8.5 NSB, DEGs up in E10.5 CNH
OCIAD2	2	DEGs down in E8.5 NSB, DEGs up in E10.5 CNH
ODZ4	2	DEGs down in E8.5 NSB, DEGs up in E10.5 CNH
OGFRL1	2	DEGs down in E8.5 NSB, DEGs up in E10.5 CNH
OXCT1	2	DEGs down in E8.5 NSB, DEGs up in E10.5 CNH
PARD6G	2	DEGs down in E8.5 NSB, DEGs up in E10.5 CNH
PCDH21	2	DEGs down in E8.5 NSB, DEGs up in E10.5 CNH
PDGFA	2	Guillot_Chicken NMPearly, DEGs down in E10.5 CNH
PDIA5	2	DEGs down in E8.5 NSB, DEGs up in E10.5 CNH
PDZK1	2	DEGs up in E8.5 NSB, DEGs down in E10.5 CNH
PDZRN3	2	Guillot_Chicken NMPearly, DEGs up in E8.5 NSB
PEA15	2	DEGs down in E8.5 NSB, DEGs up in E10.5 CNH
PEA15A	2	DEGs down in E8.5 NSB, DEGs up in E10.5 CNH
PHF10	2	Guillot_Chicken NMPearly, Guillot Mouse NMP late
PKP2	2	DEGs up in E8.5 NSB, DEGs down in E10.5 CNH
PLCG2	2	DEGs up in E8.5 NSB, DEGs down in E10.5 CNH
PLEKHA2	2	DEGs up in E8.5 NSB, DEGs down in E10.5 CNH
PLEKHG2	2	DEGs down in E8.5 NSB, DEGs up in E10.5 CNH
PLP2	2	Guillot Mouse NMP early, DEGs down in E10.5 CNH
PMP22	2	DEGs up in E8.5 NSB, Guillot_Chicken NMPlate
POGK	2	DEGs down in E8.5 NSB, DEGs up in E10.5 CNH
PPAT	2	Guillot_Chicken NMPearly, DEGs up in E8.5 NSB
PRAMEL4	2	DEGs up in E8.5 NSB, DEGs down in E10.5 CNH
PRKAG2	2	Guillot Mouse NMP late, DEGs up in E10.5 CNH
PRKCDBP	2	DEGs down in E8.5 NSB, DEGs up in E10.5 CNH
PRR18	2	DEGs down in E8.5 NSB, DEGs up in E10.5 CNH
PRSS8	2	DEGs up in E8.5 NSB, DEGs down in E10.5 CNH
PSMC5	2	Guillot Mouse NMP early, Guillot_Chicken NMPlate
PTK7	2	DEGs down in E8.5 NSB, Guillot Mouse NMP late
PTMS	2	DEGs down in E8.5 NSB, Guillot Mouse NMP late
PTPDC1	2	DEGs down in E8.5 NSB, DEGs up in E10.5 CNH
PVRL2	2	DEGs up in E8.5 NSB, DEGs down in E10.5 CNH
PYM1	2	Guillot Mouse NMP early, Guillot_Chicken NMPlate
RAN	2	Guillot_Chicken NMPearly, Guillot Mouse NMP early
RANGRF	2	Guillot Mouse NMP early, DEGs down in E10.5 CNH
RASA3	2	DEGs down in E8.5 NSB, DEGs up in E10.5 CNH
RASGRP3	2	DEGs up in E8.5 NSB, Guillot_Chicken NMPlate
RBBP7	2	Guillot Mouse NMP early, DEGs up in E8.5 NSB
RBP1	2	Guillot Mouse NMP early, DEGs up in E8.5 NSB
RBPMS	2	DEGs up in E8.5 NSB, DEGs down in E10.5 CNH
RBPMS2	2	Guillot Mouse NMP early, DEGs up in E8.5 NSB
RCAN3	2	DEGs down in E8.5 NSB, DEGs up in E10.5 CNH
RELL1	2	DEGs down in E8.5 NSB, DEGs up in E10.5 CNH
RFTN2	2	DEGs down in E8.5 NSB, DEGs up in E10.5 CNH
RHBDF1	2	DEGs down in E8.5 NSB, DEGs up in E10.5 CNH
RHOB	2	DEGs down in E8.5 NSB, DEGs up in E10.5 CNH
RNF11	2	DEGs down in E8.5 NSB, DEGs up in E10.5 CNH
RNF208	2	DEGs down in E8.5 NSB, DEGs up in E10.5 CNH
RPL11	2	Guillot Mouse NMP early, Guillot_Chicken NMPlate
RPL27	2	Guillot Mouse NMP early, Guillot_Chicken NMPlate
RPL29	2	Guillot Mouse NMP early, Guillot_Chicken NMPlate
RPL31	2	DEGs up in E8.5 NSB, DEGs down in E10.5 CNH
RPL35	2	Guillot Mouse NMP early, Guillot_Chicken NMPlate
RPL38	2	DEGs up in E8.5 NSB, Guillot Mouse NMP late
RPL8	2	Guillot Mouse NMP early, Guillot_Chicken NMPlate
RPRM	2	DEGs down in E8.5 NSB, Guillot Mouse NMP late
RRM1	2	Guillot_Chicken NMPlate, DEGs up in E10.5 CNH
RRP12	2	DEGs up in E8.5 NSB, DEGs down in E10.5 CNH
RXRG	2	Guillot Mouse NMP early, DEGs up in E8.5 NSB
SAMD14	2	DEGs down in E8.5 NSB, DEGs up in E10.5 CNH
SAMD9L	2	DEGs down in E8.5 NSB, DEGs up in E10.5 CNH
SC4MOL	2	DEGs down in E8.5 NSB, DEGs up in E10.5 CNH
SCARA5	2	DEGs down in E8.5 NSB, DEGs up in E10.5 CNH
SCD2	2	Guillot Mouse NMP late, DEGs up in E10.5 CNH
SEMA3A	2	Guillot_Chicken NMPearly, Guillot Mouse NMP late
SEMA3F	2	DEGs down in E8.5 NSB, DEGs up in E10.5 CNH
SEMA5B	2	DEGs down in E8.5 NSB, DEGs up in E10.5 CNH
SERPINF1	2	DEGs down in E8.5 NSB, DEGs up in E10.5 CNH
SFPQ	2	Guillot_Chicken NMPlate, Guillot Mouse NMP late
SH3PXD2B	2	DEGs down in E8.5 NSB, DEGs up in E10.5 CNH
SHISA2	2	DEGs down in E8.5 NSB, DEGs up in E10.5 CNH
SLC13A4	2	DEGs up in E8.5 NSB, DEGs down in E10.5 CNH
SLC19A2	2	DEGs down in E8.5 NSB, DEGs up in E10.5 CNH
SLC1A4	2	DEGs down in E8.5 NSB, DEGs up in E10.5 CNH
SLC2A6	2	DEGs down in E8.5 NSB, DEGs up in E10.5 CNH
SLC4A1	2	DEGs down in E8.5 NSB, DEGs up in E10.5 CNH
SLC7A3	2	Guillot Mouse NMP early, DEGs up in E8.5 NSB
SLC9A3R1	2	DEGs up in E8.5 NSB, DEGs down in E10.5 CNH
SMOX	2	DEGs down in E8.5 NSB, DEGs up in E10.5 CNH
SMTNL2	2	DEGs up in E8.5 NSB, Guillot Mouse NMP late
SMUG1	2	DEGs down in E8.5 NSB, DEGs up in E10.5 CNH
SMYD2	2	DEGs down in E8.5 NSB, DEGs up in E10.5 CNH
SNRPN	2	Guillot Mouse NMP early, Guillot_Chicken NMPlate
SNURF	2	DEGs up in E8.5 NSB, DEGs down in E10.5 CNH
SOD1	2	Guillot_Chicken NMPlate, Guillot Mouse NMP late
SP5	2	Guillot_Chicken NMPearly, Guillot Mouse NMP early
SPATS2	2	Guillot_Chicken NMPlate, Guillot Mouse NMP late
SPINK3	2	DEGs up in E8.5 NSB, DEGs down in E10.5 CNH
SPINT1	2	DEGs up in E8.5 NSB, DEGs down in E10.5 CNH
SPOCK2	2	DEGs down in E8.5 NSB, DEGs up in E10.5 CNH
SPSB1	2	DEGs down in E8.5 NSB, DEGs up in E10.5 CNH
SRSF7	2	Guillot Mouse NMP early, Guillot_Chicken NMPlate
ST5	2	DEGs down in E8.5 NSB, DEGs up in E10.5 CNH
STAT3	2	DEGs down in E8.5 NSB, DEGs up in E10.5 CNH
STK38L	2	DEGs down in E8.5 NSB, DEGs up in E10.5 CNH
STMN2	2	DEGs up in E8.5 NSB, DEGs down in E10.5 CNH
STX3	2	Guillot Mouse NMP early, DEGs up in E8.5 NSB
SULT4A1	2	DEGs up in E8.5 NSB, DEGs down in E10.5 CNH
SUSD4	2	DEGs down in E8.5 NSB, DEGs up in E10.5 CNH
SV2B	2	DEGs down in E8.5 NSB, DEGs up in E10.5 CNH
SYAP1	2	DEGs down in E8.5 NSB, DEGs up in E10.5 CNH
SYDE1	2	DEGs down in E8.5 NSB, DEGs up in E10.5 CNH
T	2	DEGs down in E8.5 NSB, DEGs up in E10.5 CNH
TALDO1	2	Guillot Mouse NMP early, Guillot_Chicken NMPlate
TAPT1	2	DEGs down in E8.5 NSB, DEGs up in E10.5 CNH
TCF12	2	Guillot_Chicken NMPlate, Guillot Mouse NMP late
TCF15	2	DEGs down in E8.5 NSB, DEGs up in E10.5 CNH
TCFL5	2	DEGs up in E8.5 NSB, DEGs down in E10.5 CNH
TDRD7	2	DEGs down in E8.5 NSB, DEGs up in E10.5 CNH
TDRKH	2	DEGs down in E8.5 NSB, DEGs up in E10.5 CNH
TES	2	DEGs up in E8.5 NSB, DEGs down in E10.5 CNH
TGFBI	2	DEGs down in E8.5 NSB, DEGs up in E10.5 CNH
THSD2	2	DEGs down in E8.5 NSB, DEGs up in E10.5 CNH
TIMP2	2	DEGs down in E8.5 NSB, DEGs up in E10.5 CNH
TIMP3	2	DEGs down in E8.5 NSB, Guillot_Chicken NMPlate
TMEM123	2	Guillot_Chicken NMPlate, Guillot Mouse NMP late
TMEM132C	2	DEGs down in E8.5 NSB, Guillot Mouse NMP late
TMEM50B	2	DEGs down in E8.5 NSB, DEGs up in E10.5 CNH
TMEM82	2	DEGs up in E8.5 NSB, DEGs down in E10.5 CNH
TMEM98	2	DEGs down in E8.5 NSB, DEGs up in E10.5 CNH
TNFRSF21	2	DEGs up in E8.5 NSB, DEGs down in E10.5 CNH
TOB1	2	DEGs down in E8.5 NSB, DEGs up in E10.5 CNH
TOMM20	2	Guillot_Chicken NMPearly, Guillot Mouse NMP early
TPM1	2	DEGs down in E8.5 NSB, DEGs up in E10.5 CNH
TPM4	2	Guillot_Chicken NMPlate, Guillot Mouse NMP late
TRH	2	Guillot Mouse NMP early, DEGs up in E8.5 NSB
TRIB2	2	DEGs down in E8.5 NSB, DEGs up in E10.5 CNH
TRIM2	2	Guillot Mouse NMP late, DEGs up in E10.5 CNH
TRIM71	2	Guillot_Chicken NMPearly, DEGs up in E8.5 NSB
TRPS1	2	DEGs down in E8.5 NSB, DEGs up in E10.5 CNH
TSPAN13	2	Guillot_Chicken NMPearly, Guillot Mouse NMP early
TSPAN7	2	DEGs down in E8.5 NSB, DEGs up in E10.5 CNH
TUBA1B	2	Guillot_Chicken NMPlate, Guillot Mouse NMP late
TULP4	2	DEGs down in E8.5 NSB, DEGs up in E10.5 CNH
TXNIP	2	DEGs down in E8.5 NSB, DEGs up in E10.5 CNH
UBE2S	2	Guillot Mouse NMP early, Guillot_Chicken NMPlate
UCHL1	2	DEGs down in E8.5 NSB, Guillot Mouse NMP late
UPP1	2	Guillot Mouse NMP early, DEGs up in E8.5 NSB
USP19	2	Guillot_Chicken NMPearly, Guillot Mouse NMP late
VEGFC	2	DEGs down in E8.5 NSB, DEGs up in E10.5 CNH
VIM	2	DEGs down in E8.5 NSB, Guillot_Chicken NMPlate
VKORC1	2	DEGs up in E8.5 NSB, DEGs down in E10.5 CNH
VSTM2B	2	DEGs down in E8.5 NSB, DEGs up in E10.5 CNH
WARS	2	Guillot_Chicken NMPlate, DEGs down in E10.5 CNH
WBP1	2	DEGs down in E8.5 NSB, Guillot_Chicken NMPlate
WFDC2	2	Guillot Mouse NMP early, DEGs up in E8.5 NSB
WFIKKN1	2	DEGs up in E8.5 NSB, DEGs down in E10.5 CNH
WHRN	2	DEGs down in E8.5 NSB, DEGs up in E10.5 CNH
XLR4A	2	DEGs up in E8.5 NSB, DEGs down in E10.5 CNH
YBX3	2	Guillot_Chicken NMPlate, Guillot Mouse NMP late
YWHAB	2	Guillot_Chicken NMPlate, Guillot Mouse NMP late
YWHAG	2	Guillot_Chicken NMPlate, Guillot Mouse NMP late
YWHAZ	2	Guillot_Chicken NMPlate, Guillot Mouse NMP late
ZFP46	2	DEGs down in E8.5 NSB, DEGs up in E10.5 CNH
ZFP521	2	DEGs down in E8.5 NSB, DEGs up in E10.5 CNH
ZKSCAN1	2	DEGs down in E8.5 NSB, DEGs up in E10.5 CNH
ZSCAN10	2	DEGs up in E8.5 NSB, DEGs down in E10.5 CNH
[truncated: 6 more columns]
