# Supplementary material for: Dynamics of primitive streak regression controls the fate of neuromesodermal progenitors in the chicken embryo
Source: eLife. 2021 Jul 6;10:e64819. doi: 10.7554/eLife.64819 (PMC8260230; doi:10.7554/eLife.64819)
Supplement: Supplementary file 5. — We used the list of differentially expressed genes (DEGs) identified in Dias et al., 2020, Guibentif et al., 2021; Gouti et al., 2017; the top 350 genes of Table 5 from Guibentif et al., 2021. For the human gene list, we computed the list of DEG in the NMP cluster compared to the pluripotent stem cell cluster and took the 350 top genes from the Diaz-Cuadros et al., 2020 study. For the list identified in this study, the genes that were kept are those that have a false discovery rate (FDR) > 0.05. To maintain a comparable number of genes, we decided to take only the top 350 genes when more than 1000 genes had an FDR > 0.05 The comparison table was done by using http://www.molbiotools.com/listcompare. For each analysis, we provide the matrix with the number of genes that are shared between two gene lists. We also give the list of the shared items between all the lists and the gene list that intersect between two gene lists. [file elife-64819-supp5.xlsx]

## Sheet: Table NMP genes
Guillot_NMP_Chicken all stages	Guillot_Chicken NMPearly	Guillot_Chicken NMPlate	Guillot_Mouse_Top350	Guillot Mouse NMP early	Guillot Mouse NMP late	Dias_NMP (Cluster 1 E8.0 )	Gouti NMP (module 1 E8.5 )	Gouti NMP (module 2 E9.5 )	Guibentif_Top350	Diaz-Cuadros_mouse (E9.5)	Diaz-Cuadros_NMP human							For Diaz-Cuadros I don’t have more than 100 genes.
T	CLDN1	RASGRP3	CDX1	POU5F1	HOXB5OS	CDH1	ALCAM	ADAMTS9	IFITM1	SLC2A3	MIXL1							For Dias, this is what is in the table
APCDD1	Wpkci-7	HOXD12	CDX2	CDX1	HOXC9	CAR4	CAR3	AGO1	PIM2	GREB1	T							For Gouti no FDR so took what is on the table
RASGRP3	PLPP1	CD99	NKX1-2	LDHB	GREB1	COL18A1	CDH1	CGNL1	PHLDA2	UCHL1	SP5							For guibentif 350 top because otherwise I would get more than 2000
FGF19	PRTG	HOXA9	HOXAAS3	FST	HOXA9	APOE	CDX1	CLDN9	FST	SOX3	NODAL							Each time there is 350 it is a cutoff arbitrary because otherwise we would need to take 1000+ genes
CHST15	DRAXIN	HOXA11	GRSF1	PTMA	HOXC6	SLC2A3	DSG2	CYP26A1	CDX2	HOXC10	FST
WLS	NKAIN4	SCD	RBP1	GRSF1	HMGA2	DUSP3	FABP7	EBF2	EPCAM	MKRN1	CNTNAP2
FGF18	SP5	HOXC9	HOXB8	APOE	GNAS	MAP2K1	FOXH1	ETS2	LAPTM4B	PMAIP1	TUBB2A
HOXA7	WNT8A	HOXC10	CRABP2	HPRT	PTMS	SLC1A3	FRZB	FAT3	CXX1B	SALL4	RBP1
WNT5A	VRTN	GREB1	ETV4	ID3	H2AFY	KIT	FST	FBN2	BEX4	SOX2	SERPINE2
CD99	NT5DC2	WNT5A	CDX4	ATP5B	NCAM1	TRH	GNB1	FGF17	WFDC2	SLC2A1	FSCN1
GJA1	EPCAM	ACTG1	HES3	EPCAM	HBB-Y	PDK1	GRSF1	FOXD1	DLL3	CHD3	EOMES
DLL1	EPHA1	S100A6	LHPP	RBP1	MLLT3	ID3	ID3	GCNT2	BEX1	CDX2	LINC01356
HOXD12	TMSB15B	HOXB5	HOXA1	PFN1	TUBA1B	WNT8A	IFIH1	HES1	DNMT3B	KCNAB3	IER3
CDH2	CDH2	ARL1	HOXB9	GPX4	UCHL1	PLS3	INA	HOXA10	T	ARID3B	TUBB2B
MSX1	MT4L	NREP	SP5	NME1	TUBA1A	GRB7	KIFC2	HOXA7	SLC2A3	SYT11	GAL
ENHO	FN1	STMN1	HOXB1	PHLDA3	HOXC8	ID2	LPAR4	HOXA9	NKX1-2	OAT	ANP32B
APLP2	CACNG3	CCNI	EPHA5	WFDC2	PITRM1	F2RL1	MOB1B	HOXB5OS	FN1	PLAGL1	VAMP8
AKAP12	CTSZ	SNX10	TSPAN13	HOXA1	SLC2A3	TDH	NKX1.2	HOXC10	APLN	HOXD11	GSTO1
WNT8A	CXCL14	ENHO	FGF17	SLC25A5	LIX1	HES1	NR6A1	HOXC6	LEFTY2	LIN28A	FOXH1
METTL6	MPZL3	HOXA4	FGF8	CXX1B	DAZAP2	PLA2G7	NT5E	HOXC9	TSPAN13	ZIC5	CDH2
FGF8	MESP1	PSMD1	SLC2A3	CITED2	SSBP2	ABCG1	POU5F1	HOXD10	TCEAL8	HOXA10	WLS
EPHA1	HSP90AA1	PDE6D	POU5F1	EIF4A1	RPS23	PMAIP1	PRTG	HOXD11	LEF1	WNT5A	DSP
APBB1IP	AMY1A	FSTL1	HES7	RANBP1	RPS28	CAMK2A	PTPRZ1	HOXD3OS1	RBMS1	CCNJL	DKK1
ARHGEF9	CFC1	METTL6	STMN2	BEX1	SCD2	SLC16A3	RXRG	HOXD8	POU5F1	NUDT14	H2AFY2
WNT3A	CNTN2	ATF4	MGST1	SRSF3	EEF1B2	PODXL	SCN2B	HOXD9	SPINT2	NCAM1	B3GNT7
HOXB7	MCAT	FGF18	SLC2A1	HNRNPA1	ID2	MCRIP2	UPP1	HSD11B2	CDKN1A	LDHA	ODC1
NKAIN4	DLL1	HOXD4	HOTAIRM1	DNMT3B	HOXA7	PGM2	WNT8A	IGFBP5	CDX1	IGFBP2	SERPINB9
SDC3	PMVK	HOXD11	NR6A1	ACER2	GRB10	PDGFA	ZIC3	KIF26B	TDH	NKX1-2	APCDD1
WNT5B	PLAC8L1	EEF1A1	CXX1A	MRPL42	HOXB9	IFIH1		LIMA1	SLC25A4	IL17RD	SLC7A5
GREB1	BMP2	TUBAL3	FGFBP3	SP5	IGF1R	ITGA6		LIMCH1	APELA	FOXD1	WNT5B
DRAXIN	LIN28A	ASB13	T	NUDC	RPS27RT	RASSF2		LIX1	RSPO3	NIN	RPLP2
JARID2	KRAS	DIXDC1	BEX4	CXX1A	SMTNL2	RRAGD		LRP2	MYL7	SCD2	NKD1
SCD	MDK	BRI3	CXX1B	DNAJA1	TUBB2B	PDPN		MFAP4	EZR	JARID2	SLC39A8
GAD1	PPAT	chPKCI	PABPC1	SSSCA1	FN1	ALPL		MSMO1	RBP1	ETV5	RPL8
TPST1	GJA1	ARHGEF9	GBX2	H2AFZ	CYP26A1	HES3		MYO5B	RASGRP2	TUBA1A	FADS1
TESC	UCH-L1	HDGF	HOXB5OS	HMGN1	FABP5	TGFBR3		NSDHL	FAM212A	ACOT7	ALDH3A2
ATP2B1	NUCB2	HAPLN1	OAT	SNRPN	WNT5A	PTN		PDE4D	CRIP2	CCND1	BNIP3
SPRY2	CD24	JARID2	HOXB2	TSPAN13	SOD1	RERG		PDK1	DUSP9	HOXA5	GAD1
GNAI3	CACUL1	OAF	LDHB	RPL8	HOXC10	TTYH1		PLAGL1	CXX1A	BEX4	RPS2
HOXA9	MYLK	MID1IP1	WNT5B	ATP5L	FGF17	PAK1		SERINC5	SLC2A1	SSBP2	RPS17
ARL1	AKR1D1	H3F3C	GREB1	H3F3B	ACTB	PIM2		SLC19A2	CRABP1	HOXC6	BMP2
C9orf3	LZTS1	RPS15A	PSIP1	ZFP428	SULF2	ERAS		SMOC2	TRH	PTK7	CDX2
PDE6D	HTRA1	NUP205	HOXC8	PSMA4	PABPC1	EFNB1		SMUG1	NEFM	LRP2	GRM4
GULP1	DHODH	HOXD8	SEMA6A	ATP5C1	BNIP3L	SLC7A3		SOCS2	CDH1	ENC1	NKX1-2
LGALS8	ACOT7	TXN	PHLDA3	NDUFS4	HBA-X	THY1		SPACA6	HMGA2	CELSR1	IL17RD
HOXA4	RAB3A	HMGN4	SKAP2	BCAS2	PALLD	RASGRP2		SPARCL1	PDGFA	KDM7A	H1FX
B4GALT1	TOMM20	SOD1	IGFBP2	CHCHD10	DUSP6	CIART		STC2	IGFBP4	FGF17	KCNG1
ANP32B	NFASC	CKAP2	SET	NPM1	SERF1	PCSK1N		STRA6L	SYNGR2	SMTNL2	RPS19
HOXB8	MCRIP2	FANCC	MKRN1	RAN	ARID3B	PHC1		TPM1	PSORS1C2	MAP1B	RPL9
SNX10	AP1S3	FAU	PTK7	PRDX6	PGK1	ZIC5		TRIL	TPI1	ENO1	RPL10
LDHB	SP4	TPST1	CCND1	SUMO1	CDH2	RAPGEF5		TRP53I11	SLC16A3	MYCL	RPS14
MSGN1	GXYLT2	TMEM123	ENO1	NECTIN2	NNAT	GM1840		TUBA1A	NEFL	PGK1	CYP1B1
CD3E	MT3	TESC	EPHA1	HMGB2	MEST	1700019D03RIK		UCHL1	PCDH19	HOXC9	CRABP2
SALL1	LSS	C9orf3	FOXB1	EMB	CHD3	2900011O08RIK		WNT5A	CHCHD10	HOXC11	RPL17
HOXA5	GCHFR	HDGFL3	EVX1OS	RPS3A1	IGF2	SOX3		ZBTB16	BST2	PCSK9	GBX2
HOXC9	AIG1	LGALS8	HOXB4	SET	MAGED1	EPCAM			FGF3	SFRP2	RPS3
COMTD1	2021-09-09	GULP1	ACOT7	CAR4	CCNJL	ZFP36L2			IGFBP2	CRABP2	GLIPR1L1
HOXA11	ITPK1	HOXA5	CCND2	LSM2	NEDD4	BST2			LHFP	IFNGR2	RPS15
COL4A1	AGRP	RPL27	TGIF1	EIF1AX	RPS25	FGFBP3			RAB25	IGF1R	RPL19
ADD3	GJB1	CD3E	NEFM	TCEAL8	MT-ND3	UTF1			MESP1	HOXD10	RPL6
ARID1B	MFGE8	ATP5ME	WNT3A	RBBP7	GM10053	NKX1-2			FOXB1	GLDC	RPL31
PCBD1	ARL8BL	ARID1B	NOTUM	NEFM	ATP5G3	CHCHD10			SP5	MLLT3	SLC25A1
TMEM123	DHDDS	HOXC8	PAK1	SUB1	CKS1BRT	DTX3L			CLDN6	BNIP3	RPS23
SP5	CKS1B	HNRNPH2	CAR14	2700060E02RIK	YWHAZ	ARL4C			ARL4C	SOCS2	ROR2
MID1IP1	SELENOS	FAM168B	CCNJL	ATP5G1	ARID1A	PCDH1			TPD52	LHPP	UBA52
ID4	TSPAN13	IGF1R	CYSTM1	UBE2N	RPL27A	EPP13			MKRN1	FABP5	RPL13A
AXIN2	B2M	RPL26L1	HOXC4	FTL1	NISCH	EML1			MGST1	EPHA2	GAPDH
SKAP2	NOL11	ANXA2	EVX1	NKX1-2	GM3839	ZFP36L3			CITED1	CYSTM1	RPS12
BAMBI	TSPAN16	PMP22	HOXA7	BEX3	SSBP3	NECTIN2			FABP5	AGO1	RPL13
VAV3	EIF2AK3	RPL37A	FST	ATP5F1	IL17RD	SEMA3E			CLDN7	HES6	SLC3A2
DHX37	CTSA	VIM	NCAM1	PPP4C	VCAN	SCN2B			APLNR	PABPC1	GAS5
MPZL2	LARP7	RPL29	RXRG	SUMO2	PPP1CB	MCC			GNG3	PSIP1	RPS20
BRSK2	SPIN1W	AP5M1	HOXA3	NEFL	MAP1B	BNIP3			TMEM59L	FOXB1	RPL3
IGF1R	DPYSL3	SRGAP1	CDKN1A	NR6A1	HOXC4	APELA			RASGRP3	HOXA11OS	RPL35
NPM3	GNA11	SEM1	WNT8A	ATP5O	RPL12	B3GNT7			HES7	TUBB4B	RPL36A
RIPK2	XPR1	GARS	GAP43	RPLP0	CDKN1C	MKRN1-PS1			MEST	RTN3	RPL32
RALY	SENP5	GLO1	FZD10	DUT	IDI1	C430049E01RIK			TCEA3	CYP26A1	KRT8
LYPD6B	SGK3	ABHD18	H2AFV	MRPL28	WDR89	GM9176			CAR3	CIB1	RPL11
B3GNT7	Meis2a.2	SALL1	BCAT1	NDUFA12	RPL30				BCAT1	TPI1	NIPA2
HOXD11	IL6R	SARNP	PDGFA	ATP5G2	IFITM1				WNT3A	DTX4	RPL37
LRP11	RGN	KLHL24	SPINT2	GADD45GIP1	HNRNPA0				EMB	ZMYND8	RPS27
GCNT1	HOXB8	HNRNPUL1	HOXC6	HSP90AA1	KPNB1				APOE	EZR	RPL7
SAT1	LACTB	RPL35	HOXB7	SPC24	NDN				TUBA1A	PKM	FGF17
HOXB5	DUSP14	DTNBP1	AKR1B3	EIF3M	TPI1				MRFAP1	TRP53I11	WARS
PALD1	SMARCA4	H2AFZ	GJA1	RASGRP2	PLAGL1				WNT2	CNTFR	RPS9
SLC16A1	RMDN3	ABRAXAS2	SMIM3	BEX4	GNB1				GBX2	GBX2	EIF1
EDEM2	CHRD	ENO1	BEX1	MTCH2	RPS20				EPHA1	COL2A1	RPS4X
gga-mir-1723	EXOSC7	HOXC12	PMAIP1	SRSF7	FASN				GRSF1	2010111I01RIK	VANGL1
STMN1	CCDC88C	C12orf66	PIM1	RANGRF	CHD4				FOXC2	HSP90AB1	CXXC5
BIRC2	TRARG1	LIFR	PYCR1	PRMT1	HNRNPH1				TOM1L1	HOXC4	APOE
KIF5C	CYP1B1	GPX8	FABP5	HDAC1	CD63				TMSB10	SALL3	RPL18
LMO4	DACT1	LYPD6B	ARID3B	EEF1D	HOXA10				SLC7A3	DUSP6	KRT18
ASB13	PDZRN3	RPL11	IFNGR2	ECHS1	SFRP2				1700013H16RIK	BEX1	PGM1
CTNNB1	IRF6	MRPS17	CENPX	POLR1D	FUS				MIF	ID2	CDA
NUP205	PGM2	CRTAC1	IGDCC3	CCT5	CTNNB1				EIF4EBP1	TUBB2B	LINC00467
UNG	MYCL	ILKAP	CHD3	PSMD6	ANP32E				PRTG	TSPAN7	RPS8
PIK3R5	URB1	REEP5	TCEA3	EIF3F	RPS24				GPC3	PITRM1	CIRBP
SLC2A1	MRPS35	POU2F1	TMEM59L	TRH	UBC				FGF8	CD24A	RPL36
HOXD4	ST14	PGAM1	MAP1B	PSMA7	SOX11				DLL1	HES3	PSAT1
MKRN1	EIF2S2	COTL1	MYCL	PPIH	GM26909				SLC29A1	LIX1	RPSA
EWSR1	SPARC	ZEB1	APELA	MRPL18	UNC13D				ZFP428		RPS10
PTCHD1	DTX3L	IGFBP2	SALL4	NHP2	CS				H3F3A		RNF24
HOXA3	ANKMY2	UBE2E2	LIN28A	BTF3	TXN1				SNRPN		TMSB10
CMTM8	RASGRP1	ATF6	EBP	RPL6	CNOT6				H2AFY2		RPS16
BDH1A	ABCC6	RIPK2	PAIP2	PSMB6	SALL1				NNAT		MAP1B
RORA	ZNF518A	PCBD1	APLN	TPM3	IGF2BP3				NANOG		RPL35A
EVX1	EDNRB	RPL8	MDK	EMG1	HNRNPAB				CDH2		PPIA
CD63	PAICS	SRSF7	RARG	RPS3	AKT1				MEG3		RACK1
TIMM50	VASH1	ID3	H2AFZ	EIF3G	PBRM1				PSIP1		CHCHD10
H2AFV	FBXO5	RBM24	HOXC9	MEG3	HOXD11				TUBB3		RPS27A
CDX4	ABCE1	PSMD7	HOXA9	BCAT1	SERPINH1				ERAS		RPLP0
PSMD1	COL1A2	AP2M1	LIX1	RPL7A	IPO5				SET		RPL26
HMGB3	BF1	ACAP2	NEFL	COPS6	MAPK1IP1L				UTF1		PKM
DIXDC1	DAZAP1	CTNNB1	CDCA7	TAF7	AGO2				HOXA1		RPS26
DHCR7	CDX1	TIMP3	ALPL	STOML2	BNIP3				LDHB		COL6A1
BAZ2B	AGRN	CORO1B	CTBP2	PSMA6	YBX3				PDLIM4		SLC25A3
NUCB2	CTSD	ALDH7A1	PCDH11X	SELENOH	MCM7				B3GNT7		RPL41
ARHGAP8	GFPT2	BID	TUBB2B	PIM2	MSL1				AGTRAP		SLC25A6
CCNH	GART	ATP5MF	MSX1	RPL9	TTC3				PDLIM2		ATP5ME
CTSV	IVNS1ABP	HOXA10	H2-D1	BRIX1	CSDE1				OAT		RPL37A
SS18L1	CASR	HEXB	MARCKSL1	GM10076	PRELID2				TBX6		LZTS1
FGF1	SLC7A5	MATR3	SELENOH	TALDO1	ACOT7				TOR3A		FABP5
SAP130	WBP4	TALDO1	SP8	IMPDH2	SLC25A4				RBBP7		RPL24
MAOA	ORAI2	IFRD1	PCLAF	CCT4	BANF1				CALM2		IFITM3
COX7C	KRT7	COL4A1	DEK	RPL19	PHF10				MRPS6		RPS6
HOXB9	TIMM21	RAB5C	CRMP1	PSMB2	NSD1				TCEAL9		FASN
PUM1	FYCO1	GNAI3	ACER2	BCCIP	EIF4G2				PCSK1N		GNAL
BAG3	Pou5f3	ING3	B3GNT7	ATP5E	PRPF8				NIPSNAP1		FOXA2
HDGF	ELMOD1	COX7C	TLX2	RPS8	NAAA				MAP1B		GSTP1
KIF21A	CASP7	RAB11B	PPIA	ELOF1	UBA1				2900011O08RIK		RPS3A
HOXC12	MTF1	RRM1	CBX1	HMGB1	SREBF2				PPIC		RPS11
HEXB	TMPRSS9	WSB1	ZFP703	RPLP1	PDK1				PTN		TMEM123
FGF13	GDPD5	FBLN1	ETV5	RBM42	2010107E04RIK				ALDH1A2		MARCKS
SMC6	YRDC	MAPRE2	RSPO3	MALAT1	ACTN1				DDIT4		RPLP1
RC3H1	ABCA2	AZIN1	MIF	ANP32A	HOXA5				RHBG		ZFAS1
LEFTY2	NRXN1	MSX1	TUBA1A	PSMB3	OLFR354				SP8		FGF19
CHIC1	GBX2	RAMAC	PROM1	EEF1AKMT1	RPS21				ARMC10		LEF1
TMEM64	XPO4	DUT	ZFP428	LSM3	PTPRF				L1TD1		RPL36AL
SH3D19	DNAJC17	TOMM6	ASPSCR1	ATOX1	TRP53I11				MESP2		RPS13
GLG1	C25H1ORF43	BAZ1B	SLC16A2	PSMC5	SYT11				GAL		PTMS
NDC1	PTPRO	MKRN1	AXIN2	EIF2S1	HNRNPD				ARL4D		RPL21
TMEM163	C12orf10	UBE2Q2	EPOP	PSMB7	CYSTM1				BAMBI		GNB4
LPGAT1	NCAPH	CTGF	ZFP503	CALM2	YWHAB				HOXB3OS		RPL28
PHACTR1	CDH1	DCTN3	UCHL1	SPINT2	NOC2L				SLC6A6		SHMT2
ACVR2B	STK26	PCNP	MSI2	PPP1CA	DDX3X				SEMA6A		PMEPA1
ABHD18	RBBP8	GNG5	FKBP3	RPL36	DHX9				CHST7		PPP1R16A
ITGA4	SOX17	AK1	CALM1	RXRG	GTF2I				WNT8A		PA2G4
FAM3C	DNAJC11	CPNE2	PKM	ECI1	KDM7A				FGF17		RPL22
S100A6	RDH10	BTF3	TPD52	FTH1	P4HB				PLPP4		ENO1
ZBTB2	SUCLG2	RPL23A	MFGE8	PHLDA2	AGO1				DYNLL1		AMOTL1
SARNP	ALDH5A1	TPRG1L	EPHX2	TGIF1	CCND3				LMO1		MRPS21
GXYLT1	KANK1	GNPDA2	IL17RD	LYAR	RAD21				HES3		EIF3K
TKT	NBN	RASL11B	NKD1	RPL18A	CSRP2				CTHRC1		RPL34
HOXD8	CD2AP	JMJD4	AES	YWHAQ	PTBP1				MAGED1		TCF7
KCNK17	HIF1A	SVBP	PTN	TIMM13	HOXD4				YPEL3		MTRNR2L1
UGT8	COX18	CTHRC1	YWHAQ	RPS4X	CBX3				CMTM8		RPL29
REEP1	ETV1	RALGPS2	NAAA	OARD1	MCM6				SPINT1		EEF1D
HNRNPA1	DIRC2	SUGP1	ZYX	APLN	MDK				PCDH8		LDHB
BTBD3	NRG4	TRA2A	SFRP2	FGFBP3	GDF11				FAM213A		RPL18A
TWSG1	DUSP19	CALML4	FSCN1	UPP1	CBX5				KHDRBS1		DCLK1
SCOC	BEND6	METTL9	BNIP3L	TXNL4A	HES1				PHLDA1		EIF4A1
SOD1	NMRAL1	FANCL	CYP26A1	ECHDC2	USP22				SLC38A4		H2AFY
SPIN1W	EIF4EBP3	EIF3H	NIPSNAP1	CNPY2	HMGCS1				SOX2		YARS
TXNDC5	GALNT6	PSMD2	HOXA5	DEK	KHSRP				SFRP1		MEX3A
TTC26	SLC29A4	C13H5orf15	MYL12B	FKBP3	SLC38A2				ID3		TMA7
FUBP1	COL1A1	NAXD	ZMYND8	BAX	YWHAG				F2RL1		TRIM28
NASP	SCGN	DUSP23	EPP13	RPS19BP1	6330403K07RIK				SERPINH1		HPAT5
CHAC2	TRIM35	CLPTM1	CASP3	HOTAIRM1	ZMIZ1				LY6E		CCND1
ACTG1	GSG1L	TCF12	MCC	CBR1	TNFAIP1				BNIP3		GSC
NPTN	SLC35A5	AIFM1	PLPP4	ATP5H	RPL38				GLDC		PINK1
TENM4	EBF4	ZNF423	TNFRSF19	EXOSC3	SLC39A6				FOXF1		SLIT2
S1PR1	PYCR3	CHST15	SPINT1	RPL11	RCOR2				NOTUM		FGF4
HMGCR	HIST2H3L	BRSK2	HMGN5	NDUFA10	WDR6				EPHA4		RPS18
RUFY3	ESCO1	MRPS16	CD24A	RBPMS2	44441				ALDOA		MT-ND5
SYNE2	ST3GAL1	LRRC20	EZR	PFDN5	CSE1L				TFPI		PRKX
BICD2	MGAT1	ATP5A1Z	PRTG	GRPEL1	ZFP422				H2AFY		NME2
PTPRM	NIPBLL	XPO1	PIGX	DCUN1D5	RNPS1				FRZB		EVX1
SERINC1	CNTNAP1	SULT1B1	LDHA	RPL35	PRELID1				TPM4		RPL14
RALGPS2	EGFL7	TTC7B	CNTFR	NDUFS8	TUBB5				HIST3H2BA		MAP2K2
C3orf70	HARS	PTP4A1	WFIKKN1	ANXA7	ETS2				CNTFR		DSEL
HES1	CNR1	PSMB4	SNX10	ETFA	MYH10				EPB41L3		RPL4
SP8	DNMT3A	SAT1	PRICKLE1	EXOSC5	44450				INA		PHLDB2
PRTG	PHF10	ITGAV	NDUFS4	RPL24	DYNLL2				LHX1		NME4
FGF10	PISD	GPR107	SEMA3E	COA3	EGLN1				GREB1		RPS24
IPP	CASD1	FUBP1	IER2	RPL3	FOXD1				GNAI2		USP3
WAS	BCAT1	WNT3A	YPEL1	FKBP11	WDR26				AP3S1		FAAP20
PDIA6	MAP1LC3A	FGF13	DUSP6	CRIP2	TNKS2				SYCE2		SOX4
YTHDC1	GLTP	CDK2AP1	SCD2	NOP10	H19				SNAI1		CAMKK2
GPM6A	CORO1C	ZNF207	TUBB5	REXO2	FLNA				CXCL12		ADAM19
VSTM5	LDLRAP1	COMTD1	TEAD2	TOMM20	DDX17				ACOT7		AC068587.4
ALDH7A1	ALDH1A2	H2AFV	PLGRKT	LRPAP1	CCND1				ETV4		RPL39
TCF12	RRAGB	BIRC2	TDH	SRA1	ZC3H7B				MYL12B		LINC00458
HOXB13	LTA4H	TIMMDC1	SOX3	MRTO4	TMEM132C				IER2		NXN
TMEM154	LMO1	SLC35C1	STRBP	GMPS	EIF4B				RBPMS2		MDK
RSPO2	TNNC1	ANP32B	GLUL	RBM8A	MAGED2				FBLIM1		IDH1
CYB5D2	DHCR24	CRYAB	MDH1	LSM7	RPRM				CTBP2		RPS28
XBP1	SEMA3A	NFIL3	TECR	MRPS14	ACTG1				PDPN		MT-CYB
EEF2	APOA1	CCDC93	SALL3	RPL29	PTGES3				PTH1R		RHBDF1
KIF26A	PIK3CB	POMT1	CXXC5	RPS9	PDCD5				GCAT		NACA
ADAMTS18	PPP6R2	WLS	SOX2	PPID	CYP51				PBX1		COX4I1
EEF1D	DDX20	RACK1	HACD2	CLPP	SRP54B				WNT5B		GPX4
GRIK1	NR2C1	TUBA1B	PLPPR1	RPL27	CSNK2A1				PGK1		UROD
IL20RA	PLIN4	YBX3	CUEDC2	HSP90B1	KIF26B				GSTT2		SNHG8
FBN1	SLC29A1	PYM1	GCAT	DKC1	HPGDS				SNX10		MT-ND4L
NOTCH1	OPTN	THOC7	HSP90AB1	ATPIF1	TOP2B				PROM1		YWHAZ
ERBB2	TMEM192	CBX3	TCEAL8	SUPT4A	TCF12				TMEM54		UBL5
CREB3	SLC39A9	MBNL3	DUSP4	HSP90AB1	MPRIP				PLS3		SNRPB
SERPINC1	PANX2	EWSR1	ARMC10	GLRX3	DPYSL2				LHPP		PCDH10
PREPL	PARN	CENPX	EIF1AX	MRPL11	USP50				RBM38		NPM1
MAFK	MARCKSL1	ATP5MC3	LPAR4	TOMM22	MAP4K4				S100A10		EPHA4
H2AFY2	CDH11	SKA2	SLC37A3	CDH1	ATXN7L3B				AES		GABRB2
RACK1	SLC34A2	HP1BP3	PITRM1	PSMC4	ADPRH				CELF4		FOXB1
NSUN3	PMS2	CABP1	PGAM1	MRPS34	RAC1				CDKN1C		CDX1
AP5M1	PDHB	BRD2	PLA2G7	EEF1G	CLIC4				PDGFRA		RPL15
CPNE2	AKAP8L	XRCC5	GNAI2	PRDX2	CLTC				GRB7		RPS21
KIF3B	TAF7L	UFM1	DST	C1D	USP19				TAGLN2		RPL27A
FEZ1	ADH6	TSN	FABP7	USE1	NOCT				RFTN1		SPATC1L
ATP5F1D	KRT18	DYNLL2	FAM222A	APELA	QK				IRX1		RBMX
UBR7	RPUSD1	SMAD6	ACRBP	TDH	EEF1A1				MEIS2		PCSK9
TRPM2	CAMK2B	INTS7	APBA2	IDH3A	CSNK1E				CRMP1		RPL12
REPS1	SLC4A8	PPIA	NT5E	EPOP	MT-CO2				TENM4		EDF1
PROK1	SHTN1	RASL11A	FLYWCH2	HYPK	FOXB1				DUSP6		ATP5MPL
ILF2	ENPP2	PSMD4	ALCAM	TDP2	2610528A11RIK				CACNA1A		RPS5
FER	PLA2G6	GPC1	CENPW	RPL36AL	MEX3A				MPC2		NPM3
MFAP3	CALN1	KDELR3	GAPDH	SNRNP40	TMEM123				FOXC1		SNHG5
COL3A1	COL14A1	TIMM50	MOSPD1	EIF3K	PURB				ALCAM		DHCR24
HMGB2	CD80	XBP1	NRXN2	SYNGR2	LLGL1				ENO1		MAT2A
OTOGL	C1QTNF6	TIA1	CBY1	RPS27	IMPAD1				PCBP4		MBNL3
PYGO1	THSD1	YWHAG	NPM1	ZNHIT1	SPATS2				H2-D1		GATA6
ARHGAP21	PAK3	PPEF1	CYB5R4	MRPL34	ITCH				LMO2		H2AFZ
PTGDR	SFRP5	TCP1	HOXA4	SF3B5	DHX15				ID2		C5
DAZAP2	PKD2	TNFRSF19	TRH	RPL13	ATP2A2				PKM		PRTG
GYG2	PTPN3	UBTF	SPRY4	UQCR10	GLI3				CYP26A1		RPL38
LRRC34	gga-mir-1608	MSX2	2700060E02RIK	EIF3E	ZFP503				MID1IP1		PRKCSH
RAC3	SOD3	C11orf52	APEX1	NDUFS7	CCDC50				LDHA		EFEMP1
FZD6	ABCG1	WDR34	PAICS	GLO1	TNRC6A				KCTD6		SLC2A3
EDDM	AMPH	SUV39H2	PCDH1	LSM4	CAPRIN1				EVX1		P3H2
IL17RD	NRCAM	ANKRD10	TRP53	DPH3	HOXD9				STMN2		NQO2
MBNL3	TPD52L1	HDGFL2	DUT	STARD3NL	PGD				RASL11A		COX7B
F2RL1	NTN3	ACTB	PTMA	ATP6V0E	SOX3				SMC6		HSPA8
FBLN1	ADGRG1	MXD1	DBI	CTSZ	RPL23				PHGDH		VGLL4
DIRC2	ETNK1	CALD1	NSG1	VAPA	2010111I01RIK				CAPN2		EGR1
ATP5F1B	DMAP1	HNRNPA2B1	TSPAN3	MRPL21	SPIN1				LFNG		H3F3B
ZBED1	AGXT2	PARK7	SHF	WNT8A	MARCKS				PRDX6		APLNR
ADCY5	CUX2	YBX1	GTF3A	SMDT1	MTA1				HMGN1		CARM1
KCNN1	NANOS1	PREP	NMRAL1	MRPL40	HBB-BH1				RPS6KA4		XRCC6
HOXA6	OASL	WARS	RGMA	EIF6	PLAGL2				CPA2		MT-ATP8
TOMM6	ACACA	TLE4	SLC9A3R1	SLBP	RNF220				SOCS2		ZC3HAV1
SACS	PDGFA	TDG	MLLT3	POLR2E	AK4				GFRA3		HOXA1
TMEM35B	CACNG5	AGA	GNA14	PYM1	MSMO1				ISYNA1		COX6B1
PIP4K2A	POLG2	NIPA1	MAPK12	IGFBP2	HMGCR				KLHL6		EFNB2
PDIA3	C1GALT1C1	HSBP1	METTL26	CARNMT1	CAND1				CNN2		HDGF
DISP1	CCNB2	GKAP1	TMEM132C	EXOSC7	FADS1				GSTA4		MAGED1
CDK2AP1	VTN	HMGB3	ARL4A	BEX2	SF3B3				LHX1OS		TLE3
CTNNBIP1	DUS1L	SEC14L1	DAB1	PLP2	GPC3				HOXB2		SNRPD1
PDE10A	CRABP-I	EEF1D	PRDX4	TOMM40	PTK7				GNG5		C19orf53
HMOX1	RIPK1	WDR41	ASPHD2	CDC20	MOB1A				CUEDC2		HHLA1
MFSD2B	MAL2	NOG	TCF7	TSFM	NSD2				ITM2A		ADRA2C
P4HB	TMCC3	RTN1	HOXB3	EIF3J1	MTCH1				FAM57B		UQCRH
METTL21A	NME4	KDM5B	RANBP1	TIMM8A1	POLR2A				MYRFL		LDHA
BIVM	ANKRD66	PRDX3	SUSD4	HMGN2	POM121				TCEAL5		ATP5F1E
HDGFL3	KPNA6	CLSTN1	HOXB6	RPL28	IGF2BP1				TWIST1		ID2
PPP1R14C	PPIF	PGAP2	CD81	MRPL24	GOLM1				APOBEC3		UBC
SYNDIG1	CHST3	GDPD1	ORMDL2	SUGT1	TRIM2				ACRBP		TUBB4B
RAB6A	PCYT1B	HMGB2	GPX7	RPS2	NREP				NECTIN2		ERP29
RANBP9	PFKL	HMGB1	SEM1	CNBP	CT573034.3				SH3GL3		COX5A
TMEM131L	NOV	ARAP2	ROR2	FRZB	DNMT1				PGAM1		PTK7
MAF	PKIB	SRSF6	CELF4	NACA	COL2A1				NOTCH1		RPL30
PDZRN3	MTDH	SWAP70	THY1	PITHD1	TPM4				CPE		HNRNPDL
BNAS2	MDM2	MID1	RAB38	HSPD1	UBE2Q1				ZCCHC18		PTBP1
BID	GABRG2	GLIPR2	SOX11	ADRM1	HOXB3				GAPDH		ATP5MF
DUSP5	ABHD17A	CCNL1	ARHGEF26	SELENOW	DOCK7				IRX5		FTL
GST2L	SIKE1	YWHAZ	FKBP4	RPLP2	MT-ND6				1700027J19RIK		AL591742.2
B3GNT3	ATP5C1	CLTA	ADH5	DDT	SOX2				1700020I14RIK		CCT8
APC	TCOF1	RCN2	PRR13	TMEM59L	FIGNL2				DDAH1		ITGB5
EIF3H	SSH2	NMRK1	EPHA4	VPS29	CIB1				WNT5A		TOMM7
SLC25A26	GTSE1	GAPDH	SLAIN1	AURKAIP1	KMT2E				FZD10		HOTAIRM1
FGF3	GM2A	MGST3	GPC4	KRT18	GM10260				SOX3		DUSP5
DSTN	ARSA	TMEM199	ATP6V1F	UBE2K	SMAD4				NFIL3		RANBP1
DYRK2	DPYSL4	SNX1	TRP53I11	MRPL17	NRARP				GATA4		RHOBTB3
TUBA1B	ASCC1	IGFBP4	CALM2	RPS12	ELP2				HOTAIRM1		SSR2
CNGB3	COPS5	DHX37	RCN2	NAA20	ARID3A				HOXB1		RPL23
ND4L	MSGN1	RNF10	UBE2D1	MRPL12	NUCKS1				NOL7		HSP90AA1
SERBP1	SEMA6B	AKR1B10L1	FBLIM1	UCHL3	ENC1				UCHL1		SSBP1
MEX3B	CARMIL1	PHLDA2	PPDPF	NUP43	HK2				GLRX		METAP2
DENND5A	ANKRD17	CA9	WLS	SDHB	RASL2-9				TCF15		HMGA1
TUBA1A	MED21	SOBP	PCSK1	PPIG	HCFC1				YBX1		GAP43
HAS2	GATA2	FGD3	HMGB3	STX3	SRRM2				POLR2H		GCNT1
RAB22A	TMEM39A	RBM5	DKK4	RPL14	LDHA				RIPPLY2		ARL4C
ABHD17B	DCAF13	GJC1	CDK4	GNG3	LIMCH1				GALNT12		ATP5PO
TM9SF2L	WDR77	SPIN1Z	WNT5A	UBB	HOXD10				GAS1		FAM167A
CTNS	PANK1	SPATS2	ZNRD1	KHDRBS1	SPARCL1				THY1		CTXN1
UPP1	CNN2	GNG10	TMSB4X	YWHAH	TCEA1				ATP6V1F		CCT5
TPP1	LRRFIP2	RAB22A	HOXD4	ITM2B	IDH2				RXRG		MRPL12
SMARCD2	SPOPL	PSMD13	SULT4A1	MPLKIP	SOCS2				PLA2G12A		MT-ND2
KIDINS220	ERMARD	PNISR	CTH	SLC7A3	IGF2BP2				ATP6V0E2		SNHG6
NBEAL2	NSG1	SLC25A14	LEF1	TCEAL9	APPBP2				ODC1		IER2
SS2	ATP13A3	HSP90AB1	TSPO	FCF1	EIF4G1				MCC		P4HB
JPT1	TLCD2	IGHMBP2	PID1	RPL41	PAFAH1B2				PARP1		CLIC1
CHRNG	PPRC1	SRGAP3	EEF1AKMT1	RSL1D1	TJP1				FGF5		CHD7
ARHGAP24	TTC39A	ENPP4	HES6	ZFAND6	ACO2				NRARP		SNRPE
ERCC5	LRRC3B	SERBP1	ZFP422	DDX39	PRRC2B				FBXO44		BAZ1A
F7	ATP5MC1	TFB2M	TPI1	SSR2	SFPQ				ADGRA3		NRBP1
PTK7	NOL8	TXNDC5	FBLN1	ARF5	TCF4				LDB2		GJA1
	BUD31	FBP2	MOB1B	ARXES1	P3H3				KLHL7		HMGN2
	ACBD3	CYTL1	MEIS3	RUVBL2	PTPA				NPDC1		GARS
	TMEM69	VCP	2010111I01RIK	NDUFA13	ILF3				HTRA1		RBM8A
	CHCHD4	CHN1	ATP6V0E2	RPS13	IGSF9				PIM1		AXIN2
	HSD17B10	NIFK	MPHOSPH8	PID1	KLHL9				PLEKHF2		NEDD8
	MSMO1	SFPQ	CAMKV	VBP1	ADGRA3				GATA6		JPT1
	TNFAIP8L3	MRPL12	FBLN2	BRMS1	SUPT16				44447		CKB
	CRHBP	PDS5B	GABRG1	UQCC3	TRIL				F11R		S100A11
	TUBD1	NDUFS6	TMA7	ARL6IP5	TNPO1				JUN		IGDCC3
	ADSS	NBL1	GPM6A	UBE2S	IFNGR2				SPARC		EPHX1
	TRIM71	SLC49A3	LEMD1	ETV4	CENPV				TMEM238		FTH1
	TBC1D8	L2HGDH	PGK1	FAM92A	HEG1				MOGAT2		EPB41L4A-AS1
	RMND1	MPV17	HEXB	RPS15	ENY2				EPHA2		PREX1
	RAN	ERI2	RNASE1	CENPX	PTP4A2				CYB5A		EXOSC8
	SNCAIP	N6AMT1	WFDC2	NDUFA8	TAB2				PYCR2		SKA1
	DHRS3	PTPRM	PORCN	PSMC6	CELSR1				NDRG2		NME1
	GCSH	TBCA	CHST7	MRPL23	LDLR				ARMCX1		FAM53B
	C4	EMC1	THBS3	EIF1	FAT1				ANXA5		HES6
	C12orf43	RUFY3	ARMCX1	ARPP19	TRIM28				ACER2		BEX3
	TAGLN	EIF3E	CELSR1	GTF2E2	RBM15B				UPP1		RCN1
	GNL2	RBM45	RGS12	RRP15	FEM1B				EEF1AKMT1		EIF4EBP1
	SRD5A2	SLC25A3	LRRC42	ACP1	BRI3BP				PHC1		RPL10A
	LRRFIP1	KCTD1	GJC1	DTD1	JUND				APBA2		CYFIP1
	AGPAT3	LVRN	CDH2	UBE2D3	SON				CAR4		LONRF1
	CCDC149	WASF3	CDCA7L	RWDD1	ARID2				SLC5A5		SP8
	SNX5	OSBPL7	PTBP2	RPL26	STT3B				PRICKLE1		CLN8
	POU2F3	HOXB13	CLDN9	CDX2	GJC1				ASAH1		ERGIC3
	EXFABP	CHAC1	SSBP1	CAPZA2	AUTS2				RGS17		CCND2
	MAP7	MRPL50	COX7C	MRPL58	LASP1				HDAC1		GMPR
	PIN1	GNPDA1	TRIM2	FABP7	EID1				AP1S2		TIMM8B
	PHLPP1	SSU72	FAM60A	GCSH	PRKAG2				SMARCD3		COMMD7
	LITAF	TRAPPC6B	B230323A14RIK	TMEM165	IER5				CALD1		COPE
	MCF2L2	WDR76	PHC1	BST2	ARCN1				CFC1		MRPS15
	KIAA1671	SRPRA	CITED2	PAM16	RPL10-PS3				PDZK1		LDB2
	GATA5	AP5S1	FAM162A	PSMA2	BPTF				DDX58		TCF4
	ABCF2	HBM	F11R	VDAC3	AP1M1				KRT18		C6orf48
	KIF7	FLT4	RPS2	ALKBH7	RNF145				CRABP2		DRG1
	ASIP	CYP39A1	NXN	G3BP1	NIN				CLDND1		FAU
	ATP8B2	SNRPE	MCM7	RPL21	CELF1				1190002N15RIK		TRIP10
	PLA2R1	PSMC2	LAD1	TMEM256	UBN2				PHLDB2		EOGT
	ABL2	ARPP19	DNMT3A	OAZ1	ITGB1				CITED2		PSMD9
	BLVRA	AP3M2	H3F3A	FAM96A	EHMT1				FGF4		CFL1
	PLXNA2	FBXO9	5730596B20RIK	UQCRC1	MT-ND2				GM2694		TUBA1B
	BEST4	COLEC12	NME5	MRPL54	DDAH2				NAPRT		ZNF664
	KDM2A	STON1	GLDC	PPIB	SEMA3A				BTLA		SHISAL2B
	AFG1L	HNRNPA3	STMN1	PIGX	HNRNPA2B1				QPRT		MLLT6
	AKAP11	ZCCHC8		PSMG1	PCBP1						SOWAHC
	RGS10	CHRAC1
	R3HCC1L	GTF2E2
	PHYHIPL	TAF12
	RNLS	HNRNPR
	MAP3K1	BABAM2
	TAF4B	ALDH4A1
	FGF22	AHSA2
	TCF7L1	SNRPB2
	MYH7	PEX16
	FAIM2	ANXA5
	FRS3	RHEB
	MYO9A	CCNL2
	MRC1	H2AFY2
	NAA10	STIL
	MYSM1	RBM33
	SYT12	TOP2A
	EYA1	EIF2AK1
	SLC38A10	CAND1
	UBA5	TRAFD1
	UBASH3B	USP46
	DOCK10	RAD23A
	DHX8	ABRACL
	DGKI	MTURN
	LMBR1L	RPL4
	DAB2IP	SRSF4
	CNTF	UBE2S
	PAN3	LEPROTL1
	CLMN	NDUFB4
	VPS37B	ST3GAL2
	CD36	MCM5
	CAV3	PRPF6
	HYAL2	PTGR1
	MAK16	MRPL1
	CPN1	HNRNPH3
	FAM234B	FGFR1OP2
	IFT20	HNRNPAB
	MYL9	ITGB1BP1
	CDX4	WDHD1
	ACSF2	AGBL1
	ARL5B	PHACTR1
	ADI1	FAM45A
	CHORDC1	PSMC5
	NT5C2	HENMT1
	HDAC1	RGS17
	PTPN2	NFU1
	PDK1	FYN
	TACC3	MAP1LC3B
	CGNL1	DCBLD2
	USP19	CETN3
	RAB35	ANKRA2
		MRPL37
		MMADHC
		DAZAP2
		TMEM267
		HOXB9
		LTF
		ATP5F1D
		NDFIP1
		CYB5A
		IST1
		RIC8A
		IL17RD
		EEF2
		SNRPN
		SPRY2
		CCDC80
		CTH
		GRB2
		MBTPS1
		H3F3B
		ADA2
		SMARCA2
		CMC4
		VAV3
		B3GNT7
		ERCC5
		RNF2
		ELK3
		TPM4
		DHRS4
		EIF5
		CTBP1
		SRSF2
		YTHDC1
		DCAF12
		MAPK6
		COPS2
		MCRS1
		MCPH1
		SDR42E1
		HIST1H46L2
		FSIP1
		MLLT10
		PRLR
		PTPRZ1
		YPEL1
		C1H12ORF57
		CXCR4
		FAM210A
		MZT1
		FGF1
		RPP25L
		SLC18B1
		YWHAB
		COL3A1
		WDR5
		COQ8B
		CDC42SE1
		FARP2
		RNASEH2B
		POFUT1
		NDUFS4
		ISOC1
		VPS13C
		EIF4EBP2
		MCM3
		SLC25A16
		PTPN6
		RHOA
		GGPS1
		WBP1
		PLOD1
		UBE2H
		ACAT1
		IP6K2

## Sheet: Table NMP for comparison
This study		Diaz-Cuadros et al, 2020		Guibentif et al, 2021	Dias et al, 2020	Gouti et al, 2017
Guillot_Chicken	Guillot_Mouse	Human	Mouse E9.5	Mouse E6-E8.5	Mouse	Mouse
FDR>0.05	Top350	Top350	Top 100	Top350	E8.0	E8.5 & E9.5
T	CDX1	MIXL1	SLC2A3	IFITM1	CDH1	ALCAM
APCDD1	CDX2	T	GREB1	PIM2	CAR4	CAR3
RASGRP3	NKX1-2	SP5	UCHL1	PHLDA2	COL18A1	CDH1
FGF19	HOXAAS3	NODAL	SOX3	FST	APOE	CDX1
CHST15	GRSF1	FST	HOXC10	CDX2	SLC2A3	DSG2
WLS	RBP1	CNTNAP2	MKRN1	EPCAM	DUSP3	FABP7
FGF18	HOXB8	TUBB2A	PMAIP1	LAPTM4B	MAP2K1	FOXH1
HOXA7	CRABP2	RBP1	SALL4	CXX1B	SLC1A3	FRZB
WNT5A	ETV4	SERPINE2	SOX2	BEX4	KIT	FST
CD99	CDX4	FSCN1	SLC2A1	WFDC2	TRH	GNB1
GJA1	HES3	EOMES	CHD3	DLL3	PDK1	GRSF1
DLL1	LHPP	LINC01356	CDX2	BEX1	ID3	ID3
HOXD12	HOXA1	IER3	KCNAB3	DNMT3B	WNT8A	IFIH1
CDH2	HOXB9	TUBB2B	ARID3B	T	PLS3	INA
MSX1	SP5	GAL	SYT11	SLC2A3	GRB7	KIFC2
ENHO	HOXB1	ANP32B	OAT	NKX1-2	ID2	LPAR4
APLP2	EPHA5	VAMP8	PLAGL1	FN1	F2RL1	MOB1B
AKAP12	TSPAN13	GSTO1	HOXD11	APLN	TDH	NKX1.2
WNT8A	FGF17	FOXH1	LIN28A	LEFTY2	HES1	NR6A1
METTL6	FGF8	CDH2	ZIC5	TSPAN13	PLA2G7	NT5E
FGF8	SLC2A3	WLS	HOXA10	TCEAL8	ABCG1	POU5F1
EPHA1	POU5F1	DSP	WNT5A	LEF1	PMAIP1	PRTG
APBB1IP	HES7	DKK1	CCNJL	RBMS1	CAMK2A	PTPRZ1
ARHGEF9	STMN2	H2AFY2	NUDT14	POU5F1	SLC16A3	RXRG
WNT3A	MGST1	B3GNT7	NCAM1	SPINT2	PODXL	SCN2B
HOXB7	SLC2A1	ODC1	LDHA	CDKN1A	MCRIP2	UPP1
NKAIN4	HOTAIRM1	SERPINB9	IGFBP2	CDX1	PGM2	WNT8A
SDC3	NR6A1	APCDD1	NKX1-2	TDH	PDGFA	ZIC3
WNT5B	CXX1A	SLC7A5	IL17RD	SLC25A4	IFIH1	ADAMTS9
GREB1	FGFBP3	WNT5B	FOXD1	APELA	ITGA6	AGO1
DRAXIN	T	RPLP2	NIN	RSPO3	RASSF2	CGNL1
JARID2	BEX4	NKD1	SCD2	MYL7	RRAGD	CLDN9
SCD	CXX1B	SLC39A8	JARID2	EZR	PDPN	CYP26A1
GAD1	PABPC1	RPL8	ETV5	RBP1	ALPL	EBF2
TPST1	GBX2	FADS1	TUBA1A	RASGRP2	HES3	ETS2
TESC	HOXB5OS	ALDH3A2	ACOT7	FAM212A	TGFBR3	FAT3
ATP2B1	OAT	BNIP3	CCND1	CRIP2	PTN	FBN2
SPRY2	HOXB2	GAD1	HOXA5	DUSP9	RERG	FGF17
GNAI3	LDHB	RPS2	BEX4	CXX1A	TTYH1	FOXD1
HOXA9	WNT5B	RPS17	SSBP2	SLC2A1	PAK1	GCNT2
ARL1	GREB1	BMP2	HOXC6	CRABP1	PIM2	HES1
C9orf3	PSIP1	CDX2	PTK7	TRH	ERAS	HOXA10
PDE6D	HOXC8	GRM4	LRP2	NEFM	EFNB1	HOXA7
GULP1	SEMA6A	NKX1-2	ENC1	CDH1	SLC7A3	HOXA9
LGALS8	PHLDA3	IL17RD	CELSR1	HMGA2	THY1	HOXB5OS
HOXA4	SKAP2	H1FX	KDM7A	PDGFA	RASGRP2	HOXC10
B4GALT1	IGFBP2	KCNG1	FGF17	IGFBP4	CIART	HOXC6
ANP32B	SET	RPS19	SMTNL2	SYNGR2	PCSK1N	HOXC9
HOXB8	MKRN1	RPL9	MAP1B	PSORS1C2	PHC1	HOXD10
SNX10	PTK7	RPL10	ENO1	TPI1	ZIC5	HOXD11
LDHB	CCND1	RPS14	MYCL	SLC16A3	RAPGEF5	HOXD3OS1
MSGN1	ENO1	CYP1B1	PGK1	NEFL	GM1840	HOXD8
CD3E	EPHA1	CRABP2	HOXC9	PCDH19	1700019D03RIK	HOXD9
SALL1	FOXB1	RPL17	HOXC11	CHCHD10	2900011O08RIK	HSD11B2
HOXA5	EVX1OS	GBX2	PCSK9	BST2	SOX3	IGFBP5
HOXC9	HOXB4	RPS3	SFRP2	FGF3	EPCAM	KIF26B
COMTD1	ACOT7	GLIPR1L1	CRABP2	IGFBP2	ZFP36L2	LIMA1
HOXA11	CCND2	RPS15	IFNGR2	LHFP	BST2	LIMCH1
COL4A1	TGIF1	RPL19	IGF1R	RAB25	FGFBP3	LIX1
ADD3	NEFM	RPL6	HOXD10	MESP1	UTF1	LRP2
ARID1B	WNT3A	RPL31	GLDC	FOXB1	NKX1-2	MFAP4
PCBD1	NOTUM	SLC25A1	MLLT3	SP5	CHCHD10	MSMO1
TMEM123	PAK1	RPS23	BNIP3	CLDN6	DTX3L	MYO5B
SP5	CAR14	ROR2	SOCS2	ARL4C	ARL4C	NSDHL
MID1IP1	CCNJL	UBA52	LHPP	TPD52	PCDH1	PDE4D
ID4	CYSTM1	RPL13A	FABP5	MKRN1	EPP13	PDK1
AXIN2	HOXC4	GAPDH	EPHA2	MGST1	EML1	PLAGL1
SKAP2	EVX1	RPS12	CYSTM1	CITED1	ZFP36L3	SERINC5
BAMBI	HOXA7	RPL13	AGO1	FABP5	NECTIN2	SLC19A2
VAV3	FST	SLC3A2	HES6	CLDN7	SEMA3E	SMOC2
DHX37	NCAM1	GAS5	PABPC1	APLNR	SCN2B	SMUG1
MPZL2	RXRG	RPS20	PSIP1	GNG3	MCC	SOCS2
BRSK2	HOXA3	RPL3	FOXB1	TMEM59L	BNIP3	SPACA6
IGF1R	CDKN1A	RPL35	HOXA11OS	RASGRP3	APELA	SPARCL1
NPM3	WNT8A	RPL36A	TUBB4B	HES7	B3GNT7	STC2
RIPK2	GAP43	RPL32	RTN3	MEST	MKRN1-PS1	STRA6L
RALY	FZD10	KRT8	CYP26A1	TCEA3	C430049E01RIK	TPM1
LYPD6B	H2AFV	RPL11	CIB1	CAR3	GM9176	TRIL
B3GNT7	BCAT1	NIPA2	TPI1	BCAT1		TRP53I11
HOXD11	PDGFA	RPL37	DTX4	WNT3A		TUBA1A
LRP11	SPINT2	RPS27	ZMYND8	EMB		UCHL1
GCNT1	HOXC6	RPL7	EZR	APOE		WNT5A
SAT1	HOXB7	FGF17	PKM	TUBA1A		ZBTB16
HOXB5	AKR1B3	WARS	TRP53I11	MRFAP1
PALD1	GJA1	RPS9	CNTFR	WNT2
SLC16A1	SMIM3	EIF1	GBX2	GBX2
EDEM2	BEX1	RPS4X	COL2A1	EPHA1
gga-mir-1723	PMAIP1	VANGL1	2010111I01RIK	GRSF1
STMN1	PIM1	CXXC5	HSP90AB1	FOXC2
BIRC2	PYCR1	APOE	HOXC4	TOM1L1
KIF5C	FABP5	RPL18	SALL3	TMSB10
LMO4	ARID3B	KRT18	DUSP6	SLC7A3
ASB13	IFNGR2	PGM1	BEX1	1700013H16RIK
CTNNB1	CENPX	CDA	ID2	MIF
NUP205	IGDCC3	LINC00467	TUBB2B	EIF4EBP1
UNG	CHD3	RPS8	TSPAN7	PRTG
PIK3R5	TCEA3	CIRBP	PITRM1	GPC3
SLC2A1	TMEM59L	RPL36	CD24A	FGF8
HOXD4	MAP1B	PSAT1	HES3	DLL1
MKRN1	MYCL	RPSA	LIX1	SLC29A1
EWSR1	APELA	RPS10		ZFP428
PTCHD1	SALL4	RNF24		H3F3A
HOXA3	LIN28A	TMSB10		SNRPN
CMTM8	EBP	RPS16		H2AFY2
BDH1A	PAIP2	MAP1B		NNAT
RORA	APLN	RPL35A		NANOG
EVX1	MDK	PPIA		CDH2
CD63	RARG	RACK1		MEG3
TIMM50	H2AFZ	CHCHD10		PSIP1
H2AFV	HOXC9	RPS27A		TUBB3
CDX4	HOXA9	RPLP0		ERAS
PSMD1	LIX1	RPL26		SET
HMGB3	NEFL	PKM		UTF1
DIXDC1	CDCA7	RPS26		HOXA1
DHCR7	ALPL	COL6A1		LDHB
BAZ2B	CTBP2	SLC25A3		PDLIM4
NUCB2	PCDH11X	RPL41		B3GNT7
ARHGAP8	TUBB2B	SLC25A6		AGTRAP
CCNH	MSX1	ATP5ME		PDLIM2
CTSV	H2-D1	RPL37A		OAT
SS18L1	MARCKSL1	LZTS1		TBX6
FGF1	SELENOH	FABP5		TOR3A
SAP130	SP8	RPL24		RBBP7
MAOA	PCLAF	IFITM3		CALM2
COX7C	DEK	RPS6		MRPS6
HOXB9	CRMP1	FASN		TCEAL9
PUM1	ACER2	GNAL		PCSK1N
BAG3	B3GNT7	FOXA2		NIPSNAP1
HDGF	TLX2	GSTP1		MAP1B
KIF21A	PPIA	RPS3A		2900011O08RIK
HOXC12	CBX1	RPS11		PPIC
HEXB	ZFP703	TMEM123		PTN
FGF13	ETV5	MARCKS		ALDH1A2
SMC6	RSPO3	RPLP1		DDIT4
RC3H1	MIF	ZFAS1		RHBG
LEFTY2	TUBA1A	FGF19		SP8
CHIC1	PROM1	LEF1		ARMC10
TMEM64	ZFP428	RPL36AL		L1TD1
SH3D19	ASPSCR1	RPS13		MESP2
GLG1	SLC16A2	PTMS		GAL
NDC1	AXIN2	RPL21		ARL4D
TMEM163	EPOP	GNB4		BAMBI
LPGAT1	ZFP503	RPL28		HOXB3OS
PHACTR1	UCHL1	SHMT2		SLC6A6
ACVR2B	MSI2	PMEPA1		SEMA6A
ABHD18	FKBP3	PPP1R16A		CHST7
ITGA4	CALM1	PA2G4		WNT8A
FAM3C	PKM	RPL22		FGF17
S100A6	TPD52	ENO1		PLPP4
ZBTB2	MFGE8	AMOTL1		DYNLL1
SARNP	EPHX2	MRPS21		LMO1
GXYLT1	IL17RD	EIF3K		HES3
TKT	NKD1	RPL34		CTHRC1
HOXD8	AES	TCF7		MAGED1
KCNK17	PTN	MTRNR2L1		YPEL3
UGT8	YWHAQ	RPL29		CMTM8
REEP1	NAAA	EEF1D		SPINT1
HNRNPA1	ZYX	LDHB		PCDH8
BTBD3	SFRP2	RPL18A		FAM213A
TWSG1	FSCN1	DCLK1		KHDRBS1
SCOC	BNIP3L	EIF4A1		PHLDA1
SOD1	CYP26A1	H2AFY		SLC38A4
SPIN1W	NIPSNAP1	YARS		SOX2
TXNDC5	HOXA5	MEX3A		SFRP1
TTC26	MYL12B	TMA7		ID3
FUBP1	ZMYND8	TRIM28		F2RL1
NASP	EPP13	HPAT5		SERPINH1
CHAC2	CASP3	CCND1		LY6E
ACTG1	MCC	GSC		BNIP3
NPTN	PLPP4	PINK1		GLDC
TENM4	TNFRSF19	SLIT2		FOXF1
S1PR1	SPINT1	FGF4		NOTUM
HMGCR	HMGN5	RPS18		EPHA4
RUFY3	CD24A	MT-ND5		ALDOA
SYNE2	EZR	PRKX		TFPI
BICD2	PRTG	NME2		H2AFY
PTPRM	PIGX	EVX1		FRZB
SERINC1	LDHA	RPL14		TPM4
RALGPS2	CNTFR	MAP2K2		HIST3H2BA
C3orf70	WFIKKN1	DSEL		CNTFR
HES1	SNX10	RPL4		EPB41L3
SP8	PRICKLE1	PHLDB2		INA
PRTG	NDUFS4	NME4		LHX1
FGF10	SEMA3E	RPS24		GREB1
IPP	IER2	USP3		GNAI2
WAS	YPEL1	FAAP20		AP3S1
PDIA6	DUSP6	SOX4		SYCE2
YTHDC1	SCD2	CAMKK2		SNAI1
GPM6A	TUBB5	ADAM19		CXCL12
VSTM5	TEAD2	AC068587.4		ACOT7
ALDH7A1	PLGRKT	RPL39		ETV4
TCF12	TDH	LINC00458		MYL12B
HOXB13	SOX3	NXN		IER2
TMEM154	STRBP	MDK		RBPMS2
RSPO2	GLUL	IDH1		FBLIM1
CYB5D2	MDH1	RPS28		CTBP2
XBP1	TECR	MT-CYB		PDPN
EEF2	SALL3	RHBDF1		PTH1R
KIF26A	CXXC5	NACA		GCAT
ADAMTS18	SOX2	COX4I1		PBX1
EEF1D	HACD2	GPX4		WNT5B
GRIK1	PLPPR1	UROD		PGK1
IL20RA	CUEDC2	SNHG8		GSTT2
FBN1	GCAT	MT-ND4L		SNX10
NOTCH1	HSP90AB1	YWHAZ		PROM1
ERBB2	TCEAL8	UBL5		TMEM54
CREB3	DUSP4	SNRPB		PLS3
SERPINC1	ARMC10	PCDH10		LHPP
PREPL	EIF1AX	NPM1		RBM38
MAFK	LPAR4	EPHA4		S100A10
H2AFY2	SLC37A3	GABRB2		AES
RACK1	PITRM1	FOXB1		CELF4
NSUN3	PGAM1	CDX1		CDKN1C
AP5M1	PLA2G7	RPL15		PDGFRA
CPNE2	GNAI2	RPS21		GRB7
KIF3B	DST	RPL27A		TAGLN2
FEZ1	FABP7	SPATC1L		RFTN1
ATP5F1D	FAM222A	RBMX		IRX1
UBR7	ACRBP	PCSK9		MEIS2
TRPM2	APBA2	RPL12		CRMP1
REPS1	NT5E	EDF1		TENM4
PROK1	FLYWCH2	ATP5MPL		DUSP6
ILF2	ALCAM	RPS5		CACNA1A
FER	CENPW	NPM3		MPC2
MFAP3	GAPDH	SNHG5		FOXC1
COL3A1	MOSPD1	DHCR24		ALCAM
HMGB2	NRXN2	MAT2A		ENO1
OTOGL	CBY1	MBNL3		PCBP4
PYGO1	NPM1	GATA6		H2-D1
ARHGAP21	CYB5R4	H2AFZ		LMO2
PTGDR	HOXA4	C5		ID2
DAZAP2	TRH	PRTG		PKM
GYG2	SPRY4	RPL38		CYP26A1
LRRC34	2700060E02RIK	PRKCSH		MID1IP1
RAC3	APEX1	EFEMP1		LDHA
FZD6	PAICS	SLC2A3		KCTD6
EDDM	PCDH1	P3H2		EVX1
IL17RD	TRP53	NQO2		STMN2
MBNL3	DUT	COX7B		RASL11A
F2RL1	PTMA	HSPA8		SMC6
FBLN1	DBI	VGLL4		PHGDH
DIRC2	NSG1	EGR1		CAPN2
ATP5F1B	TSPAN3	H3F3B		LFNG
ZBED1	SHF	APLNR		PRDX6
ADCY5	GTF3A	CARM1		HMGN1
KCNN1	NMRAL1	XRCC6		RPS6KA4
HOXA6	RGMA	MT-ATP8		CPA2
TOMM6	SLC9A3R1	ZC3HAV1		SOCS2
SACS	MLLT3	HOXA1		GFRA3
TMEM35B	GNA14	COX6B1		ISYNA1
PIP4K2A	MAPK12	EFNB2		KLHL6
PDIA3	METTL26	HDGF		CNN2
DISP1	TMEM132C	MAGED1		GSTA4
CDK2AP1	ARL4A	TLE3		LHX1OS
CTNNBIP1	DAB1	SNRPD1		HOXB2
PDE10A	PRDX4	C19orf53		GNG5
HMOX1	ASPHD2	HHLA1		CUEDC2
MFSD2B	TCF7	ADRA2C		ITM2A
P4HB	HOXB3	UQCRH		FAM57B
METTL21A	RANBP1	LDHA		MYRFL
BIVM	SUSD4	ATP5F1E		TCEAL5
HDGFL3	HOXB6	ID2		TWIST1
PPP1R14C	CD81	UBC		APOBEC3
SYNDIG1	ORMDL2	TUBB4B		ACRBP
RAB6A	GPX7	ERP29		NECTIN2
RANBP9	SEM1	COX5A		SH3GL3
TMEM131L	ROR2	PTK7		PGAM1
MAF	CELF4	RPL30		NOTCH1
PDZRN3	THY1	HNRNPDL		CPE
BNAS2	RAB38	PTBP1		ZCCHC18
BID	SOX11	ATP5MF		GAPDH
DUSP5	ARHGEF26	FTL		IRX5
GST2L	FKBP4	AL591742.2		1700027J19RIK
B3GNT3	ADH5	CCT8		1700020I14RIK
APC	PRR13	ITGB5		DDAH1
EIF3H	EPHA4	TOMM7		WNT5A
SLC25A26	SLAIN1	HOTAIRM1		FZD10
FGF3	GPC4	DUSP5		SOX3
DSTN	ATP6V1F	RANBP1		NFIL3
DYRK2	TRP53I11	RHOBTB3		GATA4
TUBA1B	CALM2	SSR2		HOTAIRM1
CNGB3	RCN2	RPL23		HOXB1
ND4L	UBE2D1	HSP90AA1		NOL7
SERBP1	FBLIM1	SSBP1		UCHL1
MEX3B	PPDPF	METAP2		GLRX
DENND5A	WLS	HMGA1		TCF15
TUBA1A	PCSK1	GAP43		YBX1
HAS2	HMGB3	GCNT1		POLR2H
RAB22A	DKK4	ARL4C		RIPPLY2
ABHD17B	CDK4	ATP5PO		GALNT12
TM9SF2L	WNT5A	FAM167A		GAS1
CTNS	ZNRD1	CTXN1		THY1
UPP1	TMSB4X	CCT5		ATP6V1F
TPP1	HOXD4	MRPL12		RXRG
SMARCD2	SULT4A1	MT-ND2		PLA2G12A
KIDINS220	CTH	SNHG6		ATP6V0E2
NBEAL2	LEF1	IER2		ODC1
SS2	TSPO	P4HB		MCC
JPT1	PID1	CLIC1		PARP1
CHRNG	EEF1AKMT1	CHD7		FGF5
ARHGAP24	HES6	SNRPE		NRARP
ERCC5	ZFP422	BAZ1A		FBXO44
F7	TPI1	NRBP1		ADGRA3
PTK7	FBLN1	GJA1		LDB2
	MOB1B	HMGN2		KLHL7
	MEIS3	GARS		NPDC1
	2010111I01RIK	RBM8A		HTRA1
	ATP6V0E2	AXIN2		PIM1
	MPHOSPH8	NEDD8		PLEKHF2
	CAMKV	JPT1		GATA6
	FBLN2	CKB		44447
	GABRG1	S100A11		F11R
	TMA7	IGDCC3		JUN
	GPM6A	EPHX1		SPARC
	LEMD1	FTH1		TMEM238
	PGK1	EPB41L4A-AS1		MOGAT2
	HEXB	PREX1		EPHA2
	RNASE1	EXOSC8		CYB5A
	WFDC2	SKA1		PYCR2
	PORCN	NME1		NDRG2
	CHST7	FAM53B		ARMCX1
	THBS3	HES6		ANXA5
	ARMCX1	BEX3		ACER2
	CELSR1	RCN1		UPP1
	RGS12	EIF4EBP1		EEF1AKMT1
	LRRC42	RPL10A		PHC1
	GJC1	CYFIP1		APBA2
	CDH2	LONRF1		CAR4
	CDCA7L	SP8		SLC5A5
	PTBP2	CLN8		PRICKLE1
	CLDN9	ERGIC3		ASAH1
	SSBP1	CCND2		RGS17
	COX7C	GMPR		HDAC1
	TRIM2	TIMM8B		AP1S2
	FAM60A	COMMD7		SMARCD3
	B230323A14RIK	COPE		CALD1
	PHC1	MRPS15		CFC1
	CITED2	LDB2		PDZK1
	FAM162A	TCF4		DDX58
	F11R	C6orf48		KRT18
	RPS2	DRG1		CRABP2
	NXN	FAU		CLDND1
	MCM7	TRIP10		1190002N15RIK
	LAD1	EOGT		PHLDB2
	DNMT3A	PSMD9		CITED2
	H3F3A	CFL1		FGF4
	5730596B20RIK	TUBA1B		GM2694
	NME5	ZNF664		NAPRT
	GLDC	SHISAL2B		BTLA
	STMN1	MLLT6		QPRT
		SOWAHC

## Sheet: All gene list intersect
Item	Occurences	Present In
WNT8A	5	Guillot_NMP_Chicken all stages, Guillot_Mouse_Top350, Guibentif_Top350 , Dias_NMP (Cluster 1 E8.0 ), Gouti NMP (module 1 E8.5 & module 2 E9.5 )
WNT5A	5	Guillot_NMP_Chicken all stages, Guillot_Mouse_Top350, Diaz-Cuadros_mouse (E9.5), Guibentif_Top350 , Gouti NMP (module 1 E8.5 & module 2 E9.5 )
TUBA1A	5	Guillot_NMP_Chicken all stages, Guillot_Mouse_Top350, Diaz-Cuadros_mouse (E9.5), Guibentif_Top350 , Gouti NMP (module 1 E8.5 & module 2 E9.5 )
SLC2A3	5	Guillot_Mouse_Top350, Diaz-Cuadros_NMP human, Diaz-Cuadros_mouse (E9.5), Guibentif_Top350 , Dias_NMP (Cluster 1 E8.0 )
PRTG	5	Guillot_NMP_Chicken all stages, Guillot_Mouse_Top350, Diaz-Cuadros_NMP human, Guibentif_Top350 , Gouti NMP (module 1 E8.5 & module 2 E9.5 )
NKX1-2	5	Guillot_Mouse_Top350, Diaz-Cuadros_NMP human, Diaz-Cuadros_mouse (E9.5), Guibentif_Top350 , Dias_NMP (Cluster 1 E8.0 )			Lane 1
FGF17	5	Guillot_Mouse_Top350, Diaz-Cuadros_NMP human, Diaz-Cuadros_mouse (E9.5), Guibentif_Top350 , Gouti NMP (module 1 E8.5 & module 2 E9.5 )
B3GNT7	5	Guillot_NMP_Chicken all stages, Guillot_Mouse_Top350, Diaz-Cuadros_NMP human, Guibentif_Top350 , Dias_NMP (Cluster 1 E8.0 )
WNT5B	4	Guillot_NMP_Chicken all stages, Guillot_Mouse_Top350, Diaz-Cuadros_NMP human, Guibentif_Top350			Lane 2
UCHL1	4	Guillot_Mouse_Top350, Diaz-Cuadros_mouse (E9.5), Guibentif_Top350 , Gouti NMP (module 1 E8.5 & module 2 E9.5 )
T	4	Guillot_NMP_Chicken all stages, Guillot_Mouse_Top350, Diaz-Cuadros_NMP human, Guibentif_Top350
SP8	4	Guillot_NMP_Chicken all stages, Guillot_Mouse_Top350, Diaz-Cuadros_NMP human, Guibentif_Top350			Lane 3
SP5	4	Guillot_NMP_Chicken all stages, Guillot_Mouse_Top350, Diaz-Cuadros_NMP human, Guibentif_Top350
SOX3	4	Guillot_Mouse_Top350, Diaz-Cuadros_mouse (E9.5), Guibentif_Top350 , Dias_NMP (Cluster 1 E8.0 )
SLC2A1	4	Guillot_NMP_Chicken all stages, Guillot_Mouse_Top350, Diaz-Cuadros_mouse (E9.5), Guibentif_Top350			Lane 4
PTK7	4	Guillot_NMP_Chicken all stages, Guillot_Mouse_Top350, Diaz-Cuadros_NMP human, Diaz-Cuadros_mouse (E9.5)
PKM	4	Guillot_Mouse_Top350, Diaz-Cuadros_NMP human, Diaz-Cuadros_mouse (E9.5), Guibentif_Top350
MKRN1	4	Guillot_NMP_Chicken all stages, Guillot_Mouse_Top350, Diaz-Cuadros_mouse (E9.5), Guibentif_Top350			Lane 5
MAP1B	4	Guillot_Mouse_Top350, Diaz-Cuadros_NMP human, Diaz-Cuadros_mouse (E9.5), Guibentif_Top350
LDHB	4	Guillot_NMP_Chicken all stages, Guillot_Mouse_Top350, Diaz-Cuadros_NMP human, Guibentif_Top350
LDHA	4	Guillot_Mouse_Top350, Diaz-Cuadros_NMP human, Diaz-Cuadros_mouse (E9.5), Guibentif_Top350			Lane 6
IL17RD	4	Guillot_NMP_Chicken all stages, Guillot_Mouse_Top350, Diaz-Cuadros_NMP human, Diaz-Cuadros_mouse (E9.5)
ID2	4	Diaz-Cuadros_NMP human, Diaz-Cuadros_mouse (E9.5), Guibentif_Top350 , Dias_NMP (Cluster 1 E8.0 )
HOXC9	4	Guillot_NMP_Chicken all stages, Guillot_Mouse_Top350, Diaz-Cuadros_mouse (E9.5), Gouti NMP (module 1 E8.5 & module 2 E9.5 )
HES3	4	Guillot_Mouse_Top350, Diaz-Cuadros_mouse (E9.5), Guibentif_Top350 , Dias_NMP (Cluster 1 E8.0 )
GREB1	4	Guillot_NMP_Chicken all stages, Guillot_Mouse_Top350, Diaz-Cuadros_mouse (E9.5), Guibentif_Top350
GBX2	4	Guillot_Mouse_Top350, Diaz-Cuadros_NMP human, Diaz-Cuadros_mouse (E9.5), Guibentif_Top350
FST	4	Guillot_Mouse_Top350, Diaz-Cuadros_NMP human, Guibentif_Top350 , Gouti NMP (module 1 E8.5 & module 2 E9.5 )
FOXB1	4	Guillot_Mouse_Top350, Diaz-Cuadros_NMP human, Diaz-Cuadros_mouse (E9.5), Guibentif_Top350
FABP5	4	Guillot_Mouse_Top350, Diaz-Cuadros_NMP human, Diaz-Cuadros_mouse (E9.5), Guibentif_Top350
EVX1	4	Guillot_NMP_Chicken all stages, Guillot_Mouse_Top350, Diaz-Cuadros_NMP human, Guibentif_Top350
ENO1	4	Guillot_Mouse_Top350, Diaz-Cuadros_NMP human, Diaz-Cuadros_mouse (E9.5), Guibentif_Top350
CYP26A1	4	Guillot_Mouse_Top350, Diaz-Cuadros_mouse (E9.5), Guibentif_Top350 , Gouti NMP (module 1 E8.5 & module 2 E9.5 )
CRABP2	4	Guillot_Mouse_Top350, Diaz-Cuadros_NMP human, Diaz-Cuadros_mouse (E9.5), Guibentif_Top350
CDX2	4	Guillot_Mouse_Top350, Diaz-Cuadros_NMP human, Diaz-Cuadros_mouse (E9.5), Guibentif_Top350
CDX1	4	Guillot_Mouse_Top350, Diaz-Cuadros_NMP human, Guibentif_Top350 , Gouti NMP (module 1 E8.5 & module 2 E9.5 )
CDH2	4	Guillot_NMP_Chicken all stages, Guillot_Mouse_Top350, Diaz-Cuadros_NMP human, Guibentif_Top350
BNIP3	4	Diaz-Cuadros_NMP human, Diaz-Cuadros_mouse (E9.5), Guibentif_Top350 , Dias_NMP (Cluster 1 E8.0 )
WNT3A	3	Guillot_NMP_Chicken all stages, Guillot_Mouse_Top350, Guibentif_Top350
WLS	3	Guillot_NMP_Chicken all stages, Guillot_Mouse_Top350, Diaz-Cuadros_NMP human
UPP1	3	Guillot_NMP_Chicken all stages, Guibentif_Top350 , Gouti NMP (module 1 E8.5 & module 2 E9.5 )
TUBB2B	3	Guillot_Mouse_Top350, Diaz-Cuadros_NMP human, Diaz-Cuadros_mouse (E9.5)
TRP53I11	3	Guillot_Mouse_Top350, Diaz-Cuadros_mouse (E9.5), Gouti NMP (module 1 E8.5 & module 2 E9.5 )
TRH	3	Guillot_Mouse_Top350, Guibentif_Top350 , Dias_NMP (Cluster 1 E8.0 )
TPI1	3	Guillot_Mouse_Top350, Diaz-Cuadros_mouse (E9.5), Guibentif_Top350
THY1	3	Guillot_Mouse_Top350, Guibentif_Top350 , Dias_NMP (Cluster 1 E8.0 )
TDH	3	Guillot_Mouse_Top350, Guibentif_Top350 , Dias_NMP (Cluster 1 E8.0 )
SOX2	3	Guillot_Mouse_Top350, Diaz-Cuadros_mouse (E9.5), Guibentif_Top350
SOCS2	3	Diaz-Cuadros_mouse (E9.5), Guibentif_Top350 , Gouti NMP (module 1 E8.5 & module 2 E9.5 )
SNX10	3	Guillot_NMP_Chicken all stages, Guillot_Mouse_Top350, Guibentif_Top350
RXRG	3	Guillot_Mouse_Top350, Guibentif_Top350 , Gouti NMP (module 1 E8.5 & module 2 E9.5 )
RBP1	3	Guillot_Mouse_Top350, Diaz-Cuadros_NMP human, Guibentif_Top350
PTN	3	Guillot_Mouse_Top350, Guibentif_Top350 , Dias_NMP (Cluster 1 E8.0 )
PSIP1	3	Guillot_Mouse_Top350, Diaz-Cuadros_mouse (E9.5), Guibentif_Top350
POU5F1	3	Guillot_Mouse_Top350, Guibentif_Top350 , Gouti NMP (module 1 E8.5 & module 2 E9.5 )
PMAIP1	3	Guillot_Mouse_Top350, Diaz-Cuadros_mouse (E9.5), Dias_NMP (Cluster 1 E8.0 )
PHC1	3	Guillot_Mouse_Top350, Guibentif_Top350 , Dias_NMP (Cluster 1 E8.0 )
PGK1	3	Guillot_Mouse_Top350, Diaz-Cuadros_mouse (E9.5), Guibentif_Top350
PDGFA	3	Guillot_Mouse_Top350, Guibentif_Top350 , Dias_NMP (Cluster 1 E8.0 )
OAT	3	Guillot_Mouse_Top350, Diaz-Cuadros_mouse (E9.5), Guibentif_Top350
MCC	3	Guillot_Mouse_Top350, Guibentif_Top350 , Dias_NMP (Cluster 1 E8.0 )
LIX1	3	Guillot_Mouse_Top350, Diaz-Cuadros_mouse (E9.5), Gouti NMP (module 1 E8.5 & module 2 E9.5 )
LHPP	3	Guillot_Mouse_Top350, Diaz-Cuadros_mouse (E9.5), Guibentif_Top350
LEF1	3	Guillot_Mouse_Top350, Diaz-Cuadros_NMP human, Guibentif_Top350
IGFBP2	3	Guillot_Mouse_Top350, Diaz-Cuadros_mouse (E9.5), Guibentif_Top350
IER2	3	Guillot_Mouse_Top350, Diaz-Cuadros_NMP human, Guibentif_Top350
ID3	3	Guibentif_Top350 , Dias_NMP (Cluster 1 E8.0 ), Gouti NMP (module 1 E8.5 & module 2 E9.5 )
HOXD11	3	Guillot_NMP_Chicken all stages, Diaz-Cuadros_mouse (E9.5), Gouti NMP (module 1 E8.5 & module 2 E9.5 )
HOXC6	3	Guillot_Mouse_Top350, Diaz-Cuadros_mouse (E9.5), Gouti NMP (module 1 E8.5 & module 2 E9.5 )
HOXA9	3	Guillot_NMP_Chicken all stages, Guillot_Mouse_Top350, Gouti NMP (module 1 E8.5 & module 2 E9.5 )
HOXA7	3	Guillot_NMP_Chicken all stages, Guillot_Mouse_Top350, Gouti NMP (module 1 E8.5 & module 2 E9.5 )
HOXA5	3	Guillot_NMP_Chicken all stages, Guillot_Mouse_Top350, Diaz-Cuadros_mouse (E9.5)
HOXA1	3	Guillot_Mouse_Top350, Diaz-Cuadros_NMP human, Guibentif_Top350
HOTAIRM1	3	Guillot_Mouse_Top350, Diaz-Cuadros_NMP human, Guibentif_Top350
HES6	3	Guillot_Mouse_Top350, Diaz-Cuadros_NMP human, Diaz-Cuadros_mouse (E9.5)
HES1	3	Guillot_NMP_Chicken all stages, Dias_NMP (Cluster 1 E8.0 ), Gouti NMP (module 1 E8.5 & module 2 E9.5 )
H2AFY2	3	Guillot_NMP_Chicken all stages, Diaz-Cuadros_NMP human, Guibentif_Top350
GRSF1	3	Guillot_Mouse_Top350, Guibentif_Top350 , Gouti NMP (module 1 E8.5 & module 2 E9.5 )
GLDC	3	Guillot_Mouse_Top350, Diaz-Cuadros_mouse (E9.5), Guibentif_Top350
GJA1	3	Guillot_NMP_Chicken all stages, Guillot_Mouse_Top350, Diaz-Cuadros_NMP human
GAPDH	3	Guillot_Mouse_Top350, Diaz-Cuadros_NMP human, Guibentif_Top350
FGF8	3	Guillot_NMP_Chicken all stages, Guillot_Mouse_Top350, Guibentif_Top350
F2RL1	3	Guillot_NMP_Chicken all stages, Guibentif_Top350 , Dias_NMP (Cluster 1 E8.0 )
EZR	3	Guillot_Mouse_Top350, Diaz-Cuadros_mouse (E9.5), Guibentif_Top350
EPHA4	3	Guillot_Mouse_Top350, Diaz-Cuadros_NMP human, Guibentif_Top350
EPHA1	3	Guillot_NMP_Chicken all stages, Guillot_Mouse_Top350, Guibentif_Top350
DUSP6	3	Guillot_Mouse_Top350, Diaz-Cuadros_mouse (E9.5), Guibentif_Top350
CNTFR	3	Guillot_Mouse_Top350, Diaz-Cuadros_mouse (E9.5), Guibentif_Top350
CHCHD10	3	Diaz-Cuadros_NMP human, Guibentif_Top350 , Dias_NMP (Cluster 1 E8.0 )
CDH1	3	Guibentif_Top350 , Dias_NMP (Cluster 1 E8.0 ), Gouti NMP (module 1 E8.5 & module 2 E9.5 )
CCND1	3	Guillot_Mouse_Top350, Diaz-Cuadros_NMP human, Diaz-Cuadros_mouse (E9.5)
BEX4	3	Guillot_Mouse_Top350, Diaz-Cuadros_mouse (E9.5), Guibentif_Top350
BEX1	3	Guillot_Mouse_Top350, Diaz-Cuadros_mouse (E9.5), Guibentif_Top350
AXIN2	3	Guillot_NMP_Chicken all stages, Guillot_Mouse_Top350, Diaz-Cuadros_NMP human
ARL4C	3	Diaz-Cuadros_NMP human, Guibentif_Top350 , Dias_NMP (Cluster 1 E8.0 )
APOE	3	Diaz-Cuadros_NMP human, Guibentif_Top350 , Dias_NMP (Cluster 1 E8.0 )
APELA	3	Guillot_Mouse_Top350, Guibentif_Top350 , Dias_NMP (Cluster 1 E8.0 )
ALCAM	3	Guillot_Mouse_Top350, Guibentif_Top350 , Gouti NMP (module 1 E8.5 & module 2 E9.5 )
ACOT7	3	Guillot_Mouse_Top350, Diaz-Cuadros_mouse (E9.5), Guibentif_Top350
ZMYND8	2	Guillot_Mouse_Top350, Diaz-Cuadros_mouse (E9.5)
ZIC5	2	Diaz-Cuadros_mouse (E9.5), Dias_NMP (Cluster 1 E8.0 )
ZFP428	2	Guillot_Mouse_Top350, Guibentif_Top350
WFDC2	2	Guillot_Mouse_Top350, Guibentif_Top350
UTF1	2	Guibentif_Top350 , Dias_NMP (Cluster 1 E8.0 )
TUBB4B	2	Diaz-Cuadros_NMP human, Diaz-Cuadros_mouse (E9.5)
TUBA1B	2	Guillot_NMP_Chicken all stages, Diaz-Cuadros_NMP human
TSPAN13	2	Guillot_Mouse_Top350, Guibentif_Top350
TPD52	2	Guillot_Mouse_Top350, Guibentif_Top350
TMSB10	2	Diaz-Cuadros_NMP human, Guibentif_Top350
TMEM59L	2	Guillot_Mouse_Top350, Guibentif_Top350
TMEM123	2	Guillot_NMP_Chicken all stages, Diaz-Cuadros_NMP human
TMA7	2	Guillot_Mouse_Top350, Diaz-Cuadros_NMP human
TENM4	2	Guillot_NMP_Chicken all stages, Guibentif_Top350
TCF7	2	Guillot_Mouse_Top350, Diaz-Cuadros_NMP human
TCEAL8	2	Guillot_Mouse_Top350, Guibentif_Top350
TCEA3	2	Guillot_Mouse_Top350, Guibentif_Top350
STMN2	2	Guillot_Mouse_Top350, Guibentif_Top350
STMN1	2	Guillot_NMP_Chicken all stages, Guillot_Mouse_Top350
SSBP1	2	Guillot_Mouse_Top350, Diaz-Cuadros_NMP human
SPINT2	2	Guillot_Mouse_Top350, Guibentif_Top350
SPINT1	2	Guillot_Mouse_Top350, Guibentif_Top350
SMC6	2	Guillot_NMP_Chicken all stages, Guibentif_Top350
SLC7A3	2	Guibentif_Top350 , Dias_NMP (Cluster 1 E8.0 )
SLC16A3	2	Guibentif_Top350 , Dias_NMP (Cluster 1 E8.0 )
SKAP2	2	Guillot_NMP_Chicken all stages, Guillot_Mouse_Top350
SFRP2	2	Guillot_Mouse_Top350, Diaz-Cuadros_mouse (E9.5)
SET	2	Guillot_Mouse_Top350, Guibentif_Top350
SEMA6A	2	Guillot_Mouse_Top350, Guibentif_Top350
SEMA3E	2	Guillot_Mouse_Top350, Dias_NMP (Cluster 1 E8.0 )
SCN2B	2	Dias_NMP (Cluster 1 E8.0 ), Gouti NMP (module 1 E8.5 & module 2 E9.5 )
SCD2	2	Guillot_Mouse_Top350, Diaz-Cuadros_mouse (E9.5)
SALL4	2	Guillot_Mouse_Top350, Diaz-Cuadros_mouse (E9.5)
SALL3	2	Guillot_Mouse_Top350, Diaz-Cuadros_mouse (E9.5)
RSPO3	2	Guillot_Mouse_Top350, Guibentif_Top350
RPS2	2	Guillot_Mouse_Top350, Diaz-Cuadros_NMP human
ROR2	2	Guillot_Mouse_Top350, Diaz-Cuadros_NMP human
RASGRP3	2	Guillot_NMP_Chicken all stages, Guibentif_Top350
RASGRP2	2	Guibentif_Top350 , Dias_NMP (Cluster 1 E8.0 )
RANBP1	2	Guillot_Mouse_Top350, Diaz-Cuadros_NMP human
RACK1	2	Guillot_NMP_Chicken all stages, Diaz-Cuadros_NMP human
PROM1	2	Guillot_Mouse_Top350, Guibentif_Top350
PRICKLE1	2	Guillot_Mouse_Top350, Guibentif_Top350
PPIA	2	Guillot_Mouse_Top350, Diaz-Cuadros_NMP human
PLS3	2	Guibentif_Top350 , Dias_NMP (Cluster 1 E8.0 )
PLPP4	2	Guillot_Mouse_Top350, Guibentif_Top350
PLAGL1	2	Diaz-Cuadros_mouse (E9.5), Gouti NMP (module 1 E8.5 & module 2 E9.5 )
PLA2G7	2	Guillot_Mouse_Top350, Dias_NMP (Cluster 1 E8.0 )
PITRM1	2	Guillot_Mouse_Top350, Diaz-Cuadros_mouse (E9.5)
PIM2	2	Guibentif_Top350 , Dias_NMP (Cluster 1 E8.0 )
PIM1	2	Guillot_Mouse_Top350, Guibentif_Top350
PHLDB2	2	Diaz-Cuadros_NMP human, Guibentif_Top350
PGAM1	2	Guillot_Mouse_Top350, Guibentif_Top350
PDPN	2	Guibentif_Top350 , Dias_NMP (Cluster 1 E8.0 )
PDK1	2	Dias_NMP (Cluster 1 E8.0 ), Gouti NMP (module 1 E8.5 & module 2 E9.5 )
PCSK9	2	Diaz-Cuadros_NMP human, Diaz-Cuadros_mouse (E9.5)
PCSK1N	2	Guibentif_Top350 , Dias_NMP (Cluster 1 E8.0 )
PCDH1	2	Guillot_Mouse_Top350, Dias_NMP (Cluster 1 E8.0 )
PAK1	2	Guillot_Mouse_Top350, Dias_NMP (Cluster 1 E8.0 )
PABPC1	2	Guillot_Mouse_Top350, Diaz-Cuadros_mouse (E9.5)
P4HB	2	Guillot_NMP_Chicken all stages, Diaz-Cuadros_NMP human
ODC1	2	Diaz-Cuadros_NMP human, Guibentif_Top350
NXN	2	Guillot_Mouse_Top350, Diaz-Cuadros_NMP human
NT5E	2	Guillot_Mouse_Top350, Gouti NMP (module 1 E8.5 & module 2 E9.5 )
NR6A1	2	Guillot_Mouse_Top350, Gouti NMP (module 1 E8.5 & module 2 E9.5 )
NPM3	2	Guillot_NMP_Chicken all stages, Diaz-Cuadros_NMP human
NPM1	2	Guillot_Mouse_Top350, Diaz-Cuadros_NMP human
NOTUM	2	Guillot_Mouse_Top350, Guibentif_Top350
NOTCH1	2	Guillot_NMP_Chicken all stages, Guibentif_Top350
NKD1	2	Guillot_Mouse_Top350, Diaz-Cuadros_NMP human
NIPSNAP1	2	Guillot_Mouse_Top350, Guibentif_Top350
NEFM	2	Guillot_Mouse_Top350, Guibentif_Top350
NEFL	2	Guillot_Mouse_Top350, Guibentif_Top350
NECTIN2	2	Guibentif_Top350 , Dias_NMP (Cluster 1 E8.0 )
NCAM1	2	Guillot_Mouse_Top350, Diaz-Cuadros_mouse (E9.5)
MYL12B	2	Guillot_Mouse_Top350, Guibentif_Top350
MYCL	2	Guillot_Mouse_Top350, Diaz-Cuadros_mouse (E9.5)
MSX1	2	Guillot_NMP_Chicken all stages, Guillot_Mouse_Top350
MOB1B	2	Guillot_Mouse_Top350, Gouti NMP (module 1 E8.5 & module 2 E9.5 )
MLLT3	2	Guillot_Mouse_Top350, Diaz-Cuadros_mouse (E9.5)
MIF	2	Guillot_Mouse_Top350, Guibentif_Top350
MID1IP1	2	Guillot_NMP_Chicken all stages, Guibentif_Top350
MGST1	2	Guillot_Mouse_Top350, Guibentif_Top350
MDK	2	Guillot_Mouse_Top350, Diaz-Cuadros_NMP human
MBNL3	2	Guillot_NMP_Chicken all stages, Diaz-Cuadros_NMP human
MAGED1	2	Diaz-Cuadros_NMP human, Guibentif_Top350
LRP2	2	Diaz-Cuadros_mouse (E9.5), Gouti NMP (module 1 E8.5 & module 2 E9.5 )
LPAR4	2	Guillot_Mouse_Top350, Gouti NMP (module 1 E8.5 & module 2 E9.5 )
LIN28A	2	Guillot_Mouse_Top350, Diaz-Cuadros_mouse (E9.5)
LEFTY2	2	Guillot_NMP_Chicken all stages, Guibentif_Top350
LDB2	2	Diaz-Cuadros_NMP human, Guibentif_Top350
KRT18	2	Diaz-Cuadros_NMP human, Guibentif_Top350
JPT1	2	Guillot_NMP_Chicken all stages, Diaz-Cuadros_NMP human
JARID2	2	Guillot_NMP_Chicken all stages, Diaz-Cuadros_mouse (E9.5)
INA	2	Guibentif_Top350 , Gouti NMP (module 1 E8.5 & module 2 E9.5 )
IGF1R	2	Guillot_NMP_Chicken all stages, Diaz-Cuadros_mouse (E9.5)
IGDCC3	2	Guillot_Mouse_Top350, Diaz-Cuadros_NMP human
IFNGR2	2	Guillot_Mouse_Top350, Diaz-Cuadros_mouse (E9.5)
IFIH1	2	Dias_NMP (Cluster 1 E8.0 ), Gouti NMP (module 1 E8.5 & module 2 E9.5 )
HSP90AB1	2	Guillot_Mouse_Top350, Diaz-Cuadros_mouse (E9.5)
HOXD8	2	Guillot_NMP_Chicken all stages, Gouti NMP (module 1 E8.5 & module 2 E9.5 )
HOXD4	2	Guillot_NMP_Chicken all stages, Guillot_Mouse_Top350
HOXD10	2	Diaz-Cuadros_mouse (E9.5), Gouti NMP (module 1 E8.5 & module 2 E9.5 )
HOXC4	2	Guillot_Mouse_Top350, Diaz-Cuadros_mouse (E9.5)
HOXC10	2	Diaz-Cuadros_mouse (E9.5), Gouti NMP (module 1 E8.5 & module 2 E9.5 )
HOXB9	2	Guillot_NMP_Chicken all stages, Guillot_Mouse_Top350
HOXB8	2	Guillot_NMP_Chicken all stages, Guillot_Mouse_Top350
HOXB7	2	Guillot_NMP_Chicken all stages, Guillot_Mouse_Top350
HOXB5OS	2	Guillot_Mouse_Top350, Gouti NMP (module 1 E8.5 & module 2 E9.5 )
HOXB2	2	Guillot_Mouse_Top350, Guibentif_Top350
HOXB1	2	Guillot_Mouse_Top350, Guibentif_Top350
HOXA4	2	Guillot_NMP_Chicken all stages, Guillot_Mouse_Top350
HOXA3	2	Guillot_NMP_Chicken all stages, Guillot_Mouse_Top350
HOXA10	2	Diaz-Cuadros_mouse (E9.5), Gouti NMP (module 1 E8.5 & module 2 E9.5 )
HMGB3	2	Guillot_NMP_Chicken all stages, Guillot_Mouse_Top350
HEXB	2	Guillot_NMP_Chicken all stages, Guillot_Mouse_Top350
HES7	2	Guillot_Mouse_Top350, Guibentif_Top350
HDGF	2	Guillot_NMP_Chicken all stages, Diaz-Cuadros_NMP human
H3F3A	2	Guillot_Mouse_Top350, Guibentif_Top350
H2-D1	2	Guillot_Mouse_Top350, Guibentif_Top350
H2AFZ	2	Guillot_Mouse_Top350, Diaz-Cuadros_NMP human
H2AFY	2	Diaz-Cuadros_NMP human, Guibentif_Top350
H2AFV	2	Guillot_NMP_Chicken all stages, Guillot_Mouse_Top350
GRB7	2	Guibentif_Top350 , Dias_NMP (Cluster 1 E8.0 )
GPM6A	2	Guillot_NMP_Chicken all stages, Guillot_Mouse_Top350
GNAI2	2	Guillot_Mouse_Top350, Guibentif_Top350
GCNT1	2	Guillot_NMP_Chicken all stages, Diaz-Cuadros_NMP human
GCAT	2	Guillot_Mouse_Top350, Guibentif_Top350
GATA6	2	Diaz-Cuadros_NMP human, Guibentif_Top350
GAP43	2	Guillot_Mouse_Top350, Diaz-Cuadros_NMP human
GAL	2	Diaz-Cuadros_NMP human, Guibentif_Top350
GAD1	2	Guillot_NMP_Chicken all stages, Diaz-Cuadros_NMP human
FZD10	2	Guillot_Mouse_Top350, Guibentif_Top350
FSCN1	2	Guillot_Mouse_Top350, Diaz-Cuadros_NMP human
FRZB	2	Guibentif_Top350 , Gouti NMP (module 1 E8.5 & module 2 E9.5 )
FOXH1	2	Diaz-Cuadros_NMP human, Gouti NMP (module 1 E8.5 & module 2 E9.5 )
FOXD1	2	Diaz-Cuadros_mouse (E9.5), Gouti NMP (module 1 E8.5 & module 2 E9.5 )
FGFBP3	2	Guillot_Mouse_Top350, Dias_NMP (Cluster 1 E8.0 )
FGF4	2	Diaz-Cuadros_NMP human, Guibentif_Top350
FGF3	2	Guillot_NMP_Chicken all stages, Guibentif_Top350
FGF19	2	Guillot_NMP_Chicken all stages, Diaz-Cuadros_NMP human
FBLN1	2	Guillot_NMP_Chicken all stages, Guillot_Mouse_Top350
FBLIM1	2	Guillot_Mouse_Top350, Guibentif_Top350
FABP7	2	Guillot_Mouse_Top350, Gouti NMP (module 1 E8.5 & module 2 E9.5 )
F11R	2	Guillot_Mouse_Top350, Guibentif_Top350
ETV5	2	Guillot_Mouse_Top350, Diaz-Cuadros_mouse (E9.5)
ETV4	2	Guillot_Mouse_Top350, Guibentif_Top350
ERAS	2	Guibentif_Top350 , Dias_NMP (Cluster 1 E8.0 )
EPP13	2	Guillot_Mouse_Top350, Dias_NMP (Cluster 1 E8.0 )
EPHA2	2	Diaz-Cuadros_mouse (E9.5), Guibentif_Top350
EPCAM	2	Guibentif_Top350 , Dias_NMP (Cluster 1 E8.0 )
EIF4EBP1	2	Diaz-Cuadros_NMP human, Guibentif_Top350
EEF1D	2	Guillot_NMP_Chicken all stages, Diaz-Cuadros_NMP human
EEF1AKMT1	2	Guillot_Mouse_Top350, Guibentif_Top350
DUSP5	2	Guillot_NMP_Chicken all stages, Diaz-Cuadros_NMP human
DLL1	2	Guillot_NMP_Chicken all stages, Guibentif_Top350
CYSTM1	2	Guillot_Mouse_Top350, Diaz-Cuadros_mouse (E9.5)
CXXC5	2	Guillot_Mouse_Top350, Diaz-Cuadros_NMP human
CXX1B	2	Guillot_Mouse_Top350, Guibentif_Top350
CXX1A	2	Guillot_Mouse_Top350, Guibentif_Top350
CUEDC2	2	Guillot_Mouse_Top350, Guibentif_Top350
CTBP2	2	Guillot_Mouse_Top350, Guibentif_Top350
CRMP1	2	Guillot_Mouse_Top350, Guibentif_Top350
COX7C	2	Guillot_NMP_Chicken all stages, Guillot_Mouse_Top350
CMTM8	2	Guillot_NMP_Chicken all stages, Guibentif_Top350
CLDN9	2	Guillot_Mouse_Top350, Gouti NMP (module 1 E8.5 & module 2 E9.5 )
CITED2	2	Guillot_Mouse_Top350, Guibentif_Top350
CHST7	2	Guillot_Mouse_Top350, Guibentif_Top350
CHD3	2	Guillot_Mouse_Top350, Diaz-Cuadros_mouse (E9.5)
CELSR1	2	Guillot_Mouse_Top350, Diaz-Cuadros_mouse (E9.5)
CELF4	2	Guillot_Mouse_Top350, Guibentif_Top350
CDX4	2	Guillot_NMP_Chicken all stages, Guillot_Mouse_Top350
CDKN1A	2	Guillot_Mouse_Top350, Guibentif_Top350
CD24A	2	Guillot_Mouse_Top350, Diaz-Cuadros_mouse (E9.5)
CCNJL	2	Guillot_Mouse_Top350, Diaz-Cuadros_mouse (E9.5)
CCND2	2	Guillot_Mouse_Top350, Diaz-Cuadros_NMP human
CAR4	2	Guibentif_Top350 , Dias_NMP (Cluster 1 E8.0 )
CAR3	2	Guibentif_Top350 , Gouti NMP (module 1 E8.5 & module 2 E9.5 )
CALM2	2	Guillot_Mouse_Top350, Guibentif_Top350
BST2	2	Guibentif_Top350 , Dias_NMP (Cluster 1 E8.0 )
BCAT1	2	Guillot_Mouse_Top350, Guibentif_Top350
BAMBI	2	Guillot_NMP_Chicken all stages, Guibentif_Top350
ATP6V1F	2	Guillot_Mouse_Top350, Guibentif_Top350
ATP6V0E2	2	Guillot_Mouse_Top350, Guibentif_Top350
ARMCX1	2	Guillot_Mouse_Top350, Guibentif_Top350
ARMC10	2	Guillot_Mouse_Top350, Guibentif_Top350
ARID3B	2	Guillot_Mouse_Top350, Diaz-Cuadros_mouse (E9.5)
APLNR	2	Diaz-Cuadros_NMP human, Guibentif_Top350
APLN	2	Guillot_Mouse_Top350, Guibentif_Top350
APCDD1	2	Guillot_NMP_Chicken all stages, Diaz-Cuadros_NMP human
APBA2	2	Guillot_Mouse_Top350, Guibentif_Top350
ANP32B	2	Guillot_NMP_Chicken all stages, Diaz-Cuadros_NMP human
ALPL	2	Guillot_Mouse_Top350, Dias_NMP (Cluster 1 E8.0 )
AGO1	2	Diaz-Cuadros_mouse (E9.5), Gouti NMP (module 1 E8.5 & module 2 E9.5 )
AES	2	Guillot_Mouse_Top350, Guibentif_Top350
ACRBP	2	Guillot_Mouse_Top350, Guibentif_Top350
ACER2	2	Guillot_Mouse_Top350, Guibentif_Top350
2900011O08RIK	2	Guibentif_Top350 , Dias_NMP (Cluster 1 E8.0 )
2010111I01RIK	2	Guillot_Mouse_Top350, Diaz-Cuadros_mouse (E9.5)

## Sheet: 2 by 2 Gene list Intersect
Lane 1	Guillot_NMP_Chicken all stages ∩ Guillot_Mouse_Top350	Guillot_NMP_Chicken all stages ∩ Diaz-Cuadros_NMP human	Guillot_NMP_Chicken all stages ∩ Diaz-Cuadros_mouse (E9.5)	Guillot_NMP_Chicken all stages ∩ Guibentif_Top350	Guillot_NMP_Chicken all stages ∩ Dias_NMP (Cluster 1 E8.0 )	Guillot_NMP_Chicken all stages ∩ Gouti NMP (module 1 E8.5 & module 2 E9.5 )	Lane 2	Guillot_Mouse_Top350 ∩ Diaz-Cuadros_NMP human	Guillot_Mouse_Top350 ∩ Diaz-Cuadros_mouse (E9.5)	Guillot_Mouse_Top350 ∩ Guibentif_Top350	Guillot_Mouse_Top350 ∩ Dias_NMP (Cluster 1 E8.0 )	Guillot_Mouse_Top350 ∩ Gouti NMP (module 1 E8.5 & module 2 E9.5 )	Lane 3	Diaz-Cuadros_NMP human ∩ Diaz-Cuadros_mouse (E9.5)	Diaz-Cuadros_NMP human ∩ Guibentif_Top350	Diaz-Cuadros_NMP human ∩ Dias_NMP (Cluster 1 E8.0 )	Diaz-Cuadros_NMP human ∩ Gouti NMP (module 1 E8.5 & module 2 E9.5 )	Lane 4	Diaz-Cuadros_mouse (E9.5) ∩ Guibentif_Top350	Diaz-Cuadros_mouse (E9.5) ∩ Dias_NMP (Cluster 1 E8.0 )	Diaz-Cuadros_mouse (E9.5) ∩ Gouti NMP (module 1 E8.5 & module 2 E9.5 )	Lane 5	Guibentif_Top350 ∩ Dias_NMP (Cluster 1 E8.0 )	Guibentif_Top350 ∩ Gouti NMP (module 1 E8.5 & module 2 E9.5 )	Lane 6	Dias_NMP (Cluster 1 E8.0 ) ∩ Gouti NMP (module 1 E8.5 & module 2 E9.5 )
	WNT8A	WNT5B	WNT5A	WNT8A	WNT8A	WNT8A		WNT5B	ZMYND8	ZFP428	WNT8A	WNT8A		TUBB4B	WNT5B	SLC2A3	PRTG		WNT5A	ZIC5	WNT5A		WNT8A	WNT8A		WNT8A
	WNT5B	WLS	TUBA1A	WNT5B	HES1	WNT5A		WLS	WNT5A	WNT8A	TRH	WNT5A		TUBB2B	TMSB10	NKX1-2	FST		UCHL1	SOX3	UCHL1		UTF1	WNT5A		SCN2B
	WNT5A	TUBA1B	SLC2A1	WNT5A	F2RL1	UPP1		TUBB2B	UCHL1	WNT5B	THY1	UCHL1		SLC2A3	T	ID2	FOXH1		TUBA1A	SLC2A3	TUBA1A		TRH	UPP1		PDK1
	WNT3A	TMEM123	PTK7	WNT3A	B3GNT7	TUBA1A		TMA7	TUBB2B	WNT5A	TDH	TUBA1A		PTK7	SP8	CHCHD10	FGF17		TPI1	PMAIP1	TRP53I11		THY1	UCHL1		IFIH1
	WLS	T	MKRN1	UPP1		PRTG		TCF7	TUBA1A	WNT3A	SOX3	TRP53I11		PKM	SP5	BNIP3	CDX1		SOX3	NKX1-2	SOCS2		TDH	TUBA1A		ID3
	TUBA1A	SP8	JARID2	TUBA1A		HOXD8		T	TRP53I11	WFDC2	SLC2A3	RXRG		PCSK9	SLC2A3	B3GNT7			SOX2	ID2	PLAGL1		SOX3	SOCS2		HES1
	T	SP5	IL17RD	TENM4		HOXD11		SSBP1	TPI1	UCHL1	SEMA3E	PRTG		NKX1-2	RBP1	ARL4C			SOCS2	HES3	LRP2		SLC7A3	RXRG		CDH1
	STMN1	RACK1	IGF1R	T		HOXC9		SP8	SOX3	TUBA1A	PTN	POU5F1		MAP1B	PRTG	APOE			SLC2A3	BNIP3	LIX1		SLC2A3	PRTG
	SP8	PTK7	HOXD11	SP8		HOXA9		SP5	SOX2	TSPAN13	PMAIP1	NT5E		LDHA	PKM				SLC2A1		HOXD11		SLC16A3	POU5F1
	SP5	PRTG	HOXC9	SP5		HOXA7		SLC2A3	SLC2A3	TRH	PLA2G7	NR6A1		IL17RD	PHLDB2				PSIP1		HOXD10		RASGRP2	INA
	SNX10	P4HB	HOXA5	SNX10		HES1		RPS2	SLC2A1	TPI1	PHC1	MOB1B		ID2	ODC1				PKM		HOXC9		PTN	ID3
	SLC2A1	NPM3	GREB1	SMC6				ROR2	SFRP2	TPD52	PDGFA	LPAR4		HES6	NKX1-2				PGK1		HOXC6		PLS3	GRSF1
	SKAP2	MBNL3		SLC2A1				RBP1	SCD2	TMEM59L	PCDH1	LIX1		GBX2	MAP1B				OAT		HOXC10		PIM2	FST
	PTK7	LDHB		RASGRP3				RANBP1	SALL4	THY1	PAK1	HOXC9		FOXB1	MAGED1				NKX1-2		HOXA10		PHC1	FRZB
	PRTG	JPT1		PRTG				PTK7	SALL3	TDH	NKX1-2	HOXC6		FGF17	LEF1				MKRN1		FOXD1		PDPN	FGF17
	MSX1	IL17RD		NOTCH1				PRTG	PTK7	TCEAL8	MCC	HOXB5OS		FABP5	LDHB				MAP1B		FGF17		PDGFA	CYP26A1
	MKRN1	HDGF		MKRN1				PPIA	PSIP1	TCEA3	HES3	HOXA9		ENO1	LDHA				LHPP		CYP26A1		PCSK1N	CDX1
	LDHB	H2AFY2		MID1IP1				PKM	PMAIP1	T	FGFBP3	HOXA7		CRABP2	LDB2				LDHA		AGO1		NKX1-2	CDH1
	IL17RD	GJA1		LEFTY2				NXN	PKM	STMN2	EPP13	GRSF1		CDX2	KRT18				IGFBP2				NECTIN2	CAR3
	HOXD4	GCNT1		LDHB				NPM1	PITRM1	SPINT2	B3GNT7	FST		CCND1	IER2				ID2				MCC	ALCAM
	HOXC9	GAD1		H2AFY2				NKX1-2	PGK1	SPINT1	APELA	FGF17		BNIP3	ID2				HES3				ID3
	HOXB9	FGF19		GREB1				NKD1	PABPC1	SP8	ALPL	FABP7			HOXA1				GREB1				ID2
	HOXB8	EVX1		FGF8				MDK	OAT	SP5		CYP26A1			HOTAIRM1				GLDC				HES3
	HOXB7	EEF1D		FGF3				MAP1B	NKX1-2	SOX3		CLDN9			H2AFY2				GBX2				GRB7
	HOXA9	DUSP5		F2RL1				LEF1	NCAM1	SOX2		CDX1			H2AFY				FOXB1				F2RL1
	HOXA7	CDH2		EVX1				LDHB	MYCL	SNX10		ALCAM			GBX2				FGF17				ERAS
	HOXA5	B3GNT7		EPHA1				LDHA	MLLT3	SLC2A3					GATA6				FABP5				EPCAM
	HOXA4	AXIN2		DLL1				IL17RD	MKRN1	SLC2A1					GAPDH				EZR				CHCHD10
	HOXA3	APCDD1		CMTM8				IGDCC3	MAP1B	SET					GAL				EPHA2				CDH1
	HMGB3	ANP32B		CDH2				IER2	LIX1	SEMA6A					FST				ENO1				CAR4
	HEXB			BAMBI				HOXA1	LIN28A	RXRG					FOXB1				DUSP6				BST2
	H2AFV			B3GNT7				HOTAIRM1	LHPP	RSPO3					FGF4				CYP26A1				BNIP3
	GREB1							HES6	LDHA	RBP1					FGF17				CRABP2				B3GNT7
	GPM6A							H2AFZ	IL17RD	PTN					FABP5				CNTFR				ARL4C
	GJA1							GJA1	IGFBP2	PSIP1					EVX1				CDX2				APOE
	FGF8							GBX2	IFNGR2	PRTG					EPHA4				BNIP3				APELA
	FBLN1							GAPDH	HSP90AB1	PROM1					ENO1				BEX4				2900011O08RIK
	EVX1							GAP43	HOXC9	PRICKLE1					EIF4EBP1				BEX1
	EPHA1							FST	HOXC6	POU5F1					CRABP2				ACOT7
	COX7C							FSCN1	HOXC4	PLPP4					CHCHD10
	CDX4							FOXB1	HOXA5	PKM					CDX2
	CDH2							FGF17	HES6	PIM1					CDX1
	B3GNT7							FABP5	HES3	PHC1					CDH2
	AXIN2							EVX1	GREB1	PGK1					BNIP3
								EPHA4	GLDC	PGAM1					B3GNT7
								ENO1	GBX2	PDGFA					ARL4C
								CXXC5	FOXB1	OAT					APOE
								CRABP2	FGF17	NOTUM					APLNR
								CDX2	FABP5	NKX1-2
								CDX1	EZR	NIPSNAP1
								CDH2	ETV5	NEFM
								CCND2	ENO1	NEFL
								CCND1	DUSP6	MYL12B
								B3GNT7	CYSTM1	MKRN1
								AXIN2	CYP26A1	MIF
									CRABP2	MGST1
									CNTFR	MCC
									CHD3	MAP1B
									CELSR1	LHPP
									CDX2	LEF1
									CD24A	LDHB
									CCNJL	LDHA
									CCND1	IGFBP2
									BEX4	IER2
									BEX1	HOXB2
									ARID3B	HOXB1
									ACOT7	HOXA1
									2010111I01RIK	HOTAIRM1
										HES7
										HES3
										H3F3A
										H2-D1
										GRSF1
										GREB1
										GNAI2
										GLDC
										GCAT
										GBX2
										GAPDH
										FZD10
										FST
										FOXB1
										FGF8
										FGF17
										FBLIM1
										FABP5
										F11R
										EZR
										EVX1
										ETV4
										EPHA4
										EPHA1
										ENO1
										EEF1AKMT1
										DUSP6
										CYP26A1
										CXX1B
										CXX1A
										CUEDC2
										CTBP2
										CRMP1
										CRABP2
										CNTFR
										CITED2
										CHST7
										CELF4
										CDX2
										CDX1
										CDKN1A
										CDH2
										CALM2
										BEX4
										BEX1
										BCAT1
										B3GNT7
										ATP6V1F
										ATP6V0E2
										ARMCX1
										ARMC10
										APLN
										APELA
										APBA2
										ALCAM
										AES
										ACRBP
										ACOT7
										ACER2

## Sheet: chickenvsmousevshumanNMPs
Item	Occurences	Present In		Gene that is also in the 15 genes common between all the NMP stages from the chicken analysis												Guillot_NMP_Chicken all stages ∩ Guillot_Mouse_Top350	Guillot_NMP_Chicken all stages ∩ Diaz-Cuadros_NMP human	Guillot_Mouse_Top350 ∩ Diaz-Cuadros_NMP human
WNT5B	3	Guillot_NMP_Chicken all stages, Guillot_Mouse_Top350, Diaz-Cuadros_NMP human														WNT8A	WNT5B	WNT5B
WLS	3	Guillot_NMP_Chicken all stages, Guillot_Mouse_Top350, Diaz-Cuadros_NMP human														WNT5B	WLS	WLS
T	3	Guillot_NMP_Chicken all stages, Guillot_Mouse_Top350, Diaz-Cuadros_NMP human														WNT5A	TUBA1B	TUBB2B
SP8	3	Guillot_NMP_Chicken all stages, Guillot_Mouse_Top350, Diaz-Cuadros_NMP human														WNT3A	TMEM123	TMA7
SP5	3	Guillot_NMP_Chicken all stages, Guillot_Mouse_Top350, Diaz-Cuadros_NMP human														WLS	T	TCF7
PTK7	3	Guillot_NMP_Chicken all stages, Guillot_Mouse_Top350, Diaz-Cuadros_NMP human														TUBA1A	SP8	T
PRTG	3	Guillot_NMP_Chicken all stages, Guillot_Mouse_Top350, Diaz-Cuadros_NMP human														T	SP5	SSBP1
LDHB	3	Guillot_NMP_Chicken all stages, Guillot_Mouse_Top350, Diaz-Cuadros_NMP human														STMN1	RACK1	SP8
IL17RD	3	Guillot_NMP_Chicken all stages, Guillot_Mouse_Top350, Diaz-Cuadros_NMP human														SP8	PTK7	SP5
GJA1	3	Guillot_NMP_Chicken all stages, Guillot_Mouse_Top350, Diaz-Cuadros_NMP human														SP5	PRTG	SLC2A3
EVX1	3	Guillot_NMP_Chicken all stages, Guillot_Mouse_Top350, Diaz-Cuadros_NMP human														SNX10	P4HB	RPS2
CDH2	3	Guillot_NMP_Chicken all stages, Guillot_Mouse_Top350, Diaz-Cuadros_NMP human														SLC2A1	NPM3	ROR2
B3GNT7	3	Guillot_NMP_Chicken all stages, Guillot_Mouse_Top350, Diaz-Cuadros_NMP human														SKAP2	MBNL3	RBP1
AXIN2	3	Guillot_NMP_Chicken all stages, Guillot_Mouse_Top350, Diaz-Cuadros_NMP human														PTK7	LDHB	RANBP1
WNT8A	2	Guillot_NMP_Chicken all stages, Guillot_Mouse_Top350														PRTG	JPT1	PTK7
WNT5A	2	Guillot_NMP_Chicken all stages, Guillot_Mouse_Top350														MSX1	IL17RD	PRTG
WNT3A	2	Guillot_NMP_Chicken all stages, Guillot_Mouse_Top350														MKRN1	HDGF	PPIA
TUBB2B	2	Guillot_Mouse_Top350, Diaz-Cuadros_NMP human														LDHB	H2AFY2	PKM
TUBA1B	2	Guillot_NMP_Chicken all stages, Diaz-Cuadros_NMP human														IL17RD	GJA1	NXN
TUBA1A	2	Guillot_NMP_Chicken all stages, Guillot_Mouse_Top350														HOXD4	GCNT1	NPM1
TMEM123	2	Guillot_NMP_Chicken all stages, Diaz-Cuadros_NMP human														HOXC9	GAD1	NKX1-2
TMA7	2	Guillot_Mouse_Top350, Diaz-Cuadros_NMP human														HOXB9	FGF19	NKD1
TCF7	2	Guillot_Mouse_Top350, Diaz-Cuadros_NMP human														HOXB8	EVX1	MDK
STMN1	2	Guillot_NMP_Chicken all stages, Guillot_Mouse_Top350														HOXB7	EEF1D	MAP1B
SSBP1	2	Guillot_Mouse_Top350, Diaz-Cuadros_NMP human														HOXA9	DUSP5	LEF1
SNX10	2	Guillot_NMP_Chicken all stages, Guillot_Mouse_Top350														HOXA7	CDH2	LDHB
SLC2A3	2	Guillot_Mouse_Top350, Diaz-Cuadros_NMP human														HOXA5	B3GNT7	LDHA
SLC2A1	2	Guillot_NMP_Chicken all stages, Guillot_Mouse_Top350														HOXA4	AXIN2	IL17RD
SKAP2	2	Guillot_NMP_Chicken all stages, Guillot_Mouse_Top350														HOXA3	APCDD1	IGDCC3
RPS2	2	Guillot_Mouse_Top350, Diaz-Cuadros_NMP human														HMGB3	ANP32B	IER2
ROR2	2	Guillot_Mouse_Top350, Diaz-Cuadros_NMP human														HEXB		HOXA1
RBP1	2	Guillot_Mouse_Top350, Diaz-Cuadros_NMP human														H2AFV		HOTAIRM1
RANBP1	2	Guillot_Mouse_Top350, Diaz-Cuadros_NMP human														GREB1		HES6
RACK1	2	Guillot_NMP_Chicken all stages, Diaz-Cuadros_NMP human														GPM6A		H2AFZ
PPIA	2	Guillot_Mouse_Top350, Diaz-Cuadros_NMP human														GJA1		GJA1
PKM	2	Guillot_Mouse_Top350, Diaz-Cuadros_NMP human														FGF8		GBX2
P4HB	2	Guillot_NMP_Chicken all stages, Diaz-Cuadros_NMP human														FBLN1		GAPDH
NXN	2	Guillot_Mouse_Top350, Diaz-Cuadros_NMP human														EVX1		GAP43
NPM3	2	Guillot_NMP_Chicken all stages, Diaz-Cuadros_NMP human														EPHA1		FST
NPM1	2	Guillot_Mouse_Top350, Diaz-Cuadros_NMP human														COX7C		FSCN1
NKX1-2	2	Guillot_Mouse_Top350, Diaz-Cuadros_NMP human														CDX4		FOXB1
NKD1	2	Guillot_Mouse_Top350, Diaz-Cuadros_NMP human														CDH2		FGF17
MSX1	2	Guillot_NMP_Chicken all stages, Guillot_Mouse_Top350														B3GNT7		FABP5
MKRN1	2	Guillot_NMP_Chicken all stages, Guillot_Mouse_Top350														AXIN2		EVX1
MDK	2	Guillot_Mouse_Top350, Diaz-Cuadros_NMP human																EPHA4
MBNL3	2	Guillot_NMP_Chicken all stages, Diaz-Cuadros_NMP human																ENO1
MAP1B	2	Guillot_Mouse_Top350, Diaz-Cuadros_NMP human																CXXC5
LEF1	2	Guillot_Mouse_Top350, Diaz-Cuadros_NMP human																CRABP2
LDHA	2	Guillot_Mouse_Top350, Diaz-Cuadros_NMP human																CDX2
JPT1	2	Guillot_NMP_Chicken all stages, Diaz-Cuadros_NMP human																CDX1
IGDCC3	2	Guillot_Mouse_Top350, Diaz-Cuadros_NMP human																CDH2
IER2	2	Guillot_Mouse_Top350, Diaz-Cuadros_NMP human																CCND2
HOXD4	2	Guillot_NMP_Chicken all stages, Guillot_Mouse_Top350																CCND1
HOXC9	2	Guillot_NMP_Chicken all stages, Guillot_Mouse_Top350																B3GNT7
HOXB9	2	Guillot_NMP_Chicken all stages, Guillot_Mouse_Top350																AXIN2
HOXB8	2	Guillot_NMP_Chicken all stages, Guillot_Mouse_Top350
HOXB7	2	Guillot_NMP_Chicken all stages, Guillot_Mouse_Top350
HOXA9	2	Guillot_NMP_Chicken all stages, Guillot_Mouse_Top350
HOXA7	2	Guillot_NMP_Chicken all stages, Guillot_Mouse_Top350
HOXA5	2	Guillot_NMP_Chicken all stages, Guillot_Mouse_Top350
HOXA4	2	Guillot_NMP_Chicken all stages, Guillot_Mouse_Top350
HOXA3	2	Guillot_NMP_Chicken all stages, Guillot_Mouse_Top350
HOXA1	2	Guillot_Mouse_Top350, Diaz-Cuadros_NMP human
HOTAIRM1	2	Guillot_Mouse_Top350, Diaz-Cuadros_NMP human
HMGB3	2	Guillot_NMP_Chicken all stages, Guillot_Mouse_Top350
HEXB	2	Guillot_NMP_Chicken all stages, Guillot_Mouse_Top350
HES6	2	Guillot_Mouse_Top350, Diaz-Cuadros_NMP human
HDGF	2	Guillot_NMP_Chicken all stages, Diaz-Cuadros_NMP human
H2AFZ	2	Guillot_Mouse_Top350, Diaz-Cuadros_NMP human
H2AFY2	2	Guillot_NMP_Chicken all stages, Diaz-Cuadros_NMP human
H2AFV	2	Guillot_NMP_Chicken all stages, Guillot_Mouse_Top350
GREB1	2	Guillot_NMP_Chicken all stages, Guillot_Mouse_Top350
GPM6A	2	Guillot_NMP_Chicken all stages, Guillot_Mouse_Top350
GCNT1	2	Guillot_NMP_Chicken all stages, Diaz-Cuadros_NMP human
GBX2	2	Guillot_Mouse_Top350, Diaz-Cuadros_NMP human
GAPDH	2	Guillot_Mouse_Top350, Diaz-Cuadros_NMP human
GAP43	2	Guillot_Mouse_Top350, Diaz-Cuadros_NMP human
GAD1	2	Guillot_NMP_Chicken all stages, Diaz-Cuadros_NMP human
FST	2	Guillot_Mouse_Top350, Diaz-Cuadros_NMP human
FSCN1	2	Guillot_Mouse_Top350, Diaz-Cuadros_NMP human
FOXB1	2	Guillot_Mouse_Top350, Diaz-Cuadros_NMP human
FGF8	2	Guillot_NMP_Chicken all stages, Guillot_Mouse_Top350
FGF19	2	Guillot_NMP_Chicken all stages, Diaz-Cuadros_NMP human
FGF17	2	Guillot_Mouse_Top350, Diaz-Cuadros_NMP human
FBLN1	2	Guillot_NMP_Chicken all stages, Guillot_Mouse_Top350
FABP5	2	Guillot_Mouse_Top350, Diaz-Cuadros_NMP human
EPHA4	2	Guillot_Mouse_Top350, Diaz-Cuadros_NMP human
EPHA1	2	Guillot_NMP_Chicken all stages, Guillot_Mouse_Top350
ENO1	2	Guillot_Mouse_Top350, Diaz-Cuadros_NMP human
EEF1D	2	Guillot_NMP_Chicken all stages, Diaz-Cuadros_NMP human
DUSP5	2	Guillot_NMP_Chicken all stages, Diaz-Cuadros_NMP human
CXXC5	2	Guillot_Mouse_Top350, Diaz-Cuadros_NMP human
CRABP2	2	Guillot_Mouse_Top350, Diaz-Cuadros_NMP human
COX7C	2	Guillot_NMP_Chicken all stages, Guillot_Mouse_Top350
CDX4	2	Guillot_NMP_Chicken all stages, Guillot_Mouse_Top350
CDX2	2	Guillot_Mouse_Top350, Diaz-Cuadros_NMP human
CDX1	2	Guillot_Mouse_Top350, Diaz-Cuadros_NMP human
CCND2	2	Guillot_Mouse_Top350, Diaz-Cuadros_NMP human
CCND1	2	Guillot_Mouse_Top350, Diaz-Cuadros_NMP human
APCDD1	2	Guillot_NMP_Chicken all stages, Diaz-Cuadros_NMP human
ANP32B	2	Guillot_NMP_Chicken all stages, Diaz-Cuadros_NMP human
